# Supplementary material for: Consecutive 2-azidoallylation/click cycloaddition of active methylene for synthesis of functionalized hepta-1,6-dienes with a bis-1,2,3-triazole scaffold
Source: Royal Society of Chemistry journal article supplement (doi:10.1039/d2qo01118b), 2022-01-01

## **Consecutive 2-Azidoallylation/Click Cycloaddition of Active Methylene for Synthesis of Functionalized Hepta-1,6-dienes with Bis-1,2,3-triazole Scaffold**

Zhenhua Liu,<sup>a</sup> Huimin Chen,<sup>a</sup> Xingxing Gan,<sup>a</sup> Lianxiao Wang,<sup>b</sup> Ping Lin,<sup>a</sup> Jiayi Li,<sup>a</sup> Xiuxiu Huang,<sup>a</sup> Rongbiao Tian,<sup>a</sup> Xuan Liu,<sup>a</sup> Wen Gao<sup>\*a</sup> and Bo Tang<sup>\*a</sup>

<sup>a</sup>College of Chemistry, Chemical Engineering and Materials Science, Collaborative Innovation Center of Functionalized Probes for Chemical Imaging in Universities of Shandong, Key Laboratory of Molecular and Nano Probes, Ministry of Education, Shandong Provincial Key Laboratory of Clean Production of Fine Chemicals, Shandong Normal University, Jinan, 250014, P. R. China

<sup>b</sup>No.1 Middle School of Qihe Shandong, Dezhou, 253000,, P. R. China, P. R. China.

E-mail: gaowen@sdnu.edu.cn; tangb@sdnu.edu.cn

### **Contents**

|                                                                      |               |
|----------------------------------------------------------------------|---------------|
| <b>I. General information .....</b>                                  | <b>1</b>      |
| <b>II. Synthesis and analytical data of product 3, 4 and 6 .....</b> | <b>1-47</b>   |
| <b>III. NMR spectra copies .....</b>                                 | <b>48-121</b> |

## I. General information

All reagents were purchased from commercial sources and used without treatment, unless otherwise indicated. The products were purified by column chromatography over silica gel.  $^1\text{H}$  NMR and  $^{13}\text{C}$  NMR spectra were recorded at 25 °C on a Varian 400 MHz and 100 MHz, respectively, and TMS was used as internal standard. Mass spectra were recorded on Bruker AutoflexIII Smartbeam MS-spectrometer. High resolution mass spectra (HRMS) were recorded on Bruker microTof by using ESI method.

## II. Synthesis and analytical data of product 3, 4 and 6

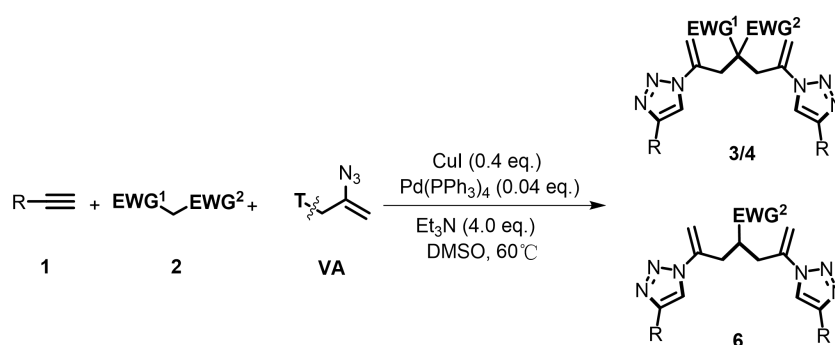

**General procedure:** Under argon atmosphere, alkyne **1** (0.55 mmol, 2.2 eq.), 2-((2-azidoallyl)oxy)-1,3,5-tribromobenzene (**VA**) (0.55 mmol, 2.2 eq.), methylene compound **2** (0.25 mmol), triethylamine (Et<sub>3</sub>N) (1.0 mmol, 4.0 eq.), CuI (0.1 mmol, 0.4 eq.) and Pd(PPh<sub>3</sub>)<sub>4</sub> (0.01 mmol, 0.04 eq.) were added in an oven-dried 10 mL Schlenk tube with 1 mL DMSO. The reaction mixture was then stirred for 2 h when TLC conformed that substrate **2** had been consumed. The reaction was cooled to room temperature and taken up by dichloromethane (3×15 mL). The combined organic layer was washed with brine (3×40 mL), dried over MgSO<sub>4</sub> and concentrated under reduced pressure. The residue was purified by a silica gel column chromatography (petroleum ether/ethyl acetate) and the target product was afforded.

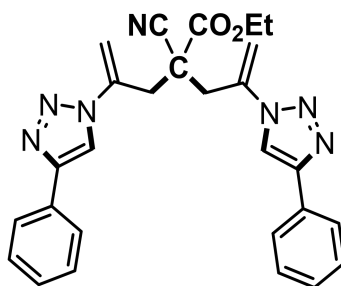

**(3a) 0.25 mmol scale:** Prepared following the general procedure showed above using phenylacetylene (60.4  $\mu\text{L}$ , 0.55 mmol, 2.2 eq.), **VA** (224.8 mg, 0.55 mmol, 2.2 eq.), ethyl cyanoacetate (26.6  $\mu\text{L}$ , 0.25 mmol, 1.0 eq.), triethylamine ( $\text{Et}_3\text{N}$ ) (139.0  $\mu\text{L}$ , 1.0 mmol, 4.0 eq.),  $\text{CuI}$  (190.4 mg, 0.1 mmol, 0.4 eq.) and  $\text{Pd}(\text{PPh}_3)_4$  (11.5 mg, 0.01 mmol, 0.04 eq.). The desired product was purified by a silica gel column chromatography (petroleum ether/ethyl acetate=2:1) as yellow oily liquid (210.9 mg, 88%);  $^1\text{H NMR}$  (400 MHz,  $\text{CDCl}_3$ )  $\delta$  8.03 (s, 2H), 7.88–7.81 (m, 4H), 7.47–7.39 (m, 4H), 7.40–7.31 (m, 2H), 5.61 (d,  $J = 2.2$  Hz, 2H), 5.34 (d,  $J = 2.1$  Hz, 2H), 3.97 (q,  $J = 7.2$  Hz, 2H), 3.68 (d,  $J = 14.9$  Hz, 2H), 3.48 (d,  $J = 14.9$  Hz, 2H), 1.16 (t,  $J = 7.2$  Hz, 3H);  $^{13}\text{C NMR}$  (100 MHz,  $\text{CDCl}_3$ )  $\delta$  166.6, 148.3, 137.7, 129.8, 128.9, 128.6, 125.9, 118.0, 116.6, 110.0, 63.8, 48.9, 39.1, 13.7; **HRMS** (ESI)  $m/z$  calculated for  $\text{C}_{27}\text{H}_{25}\text{N}_2\text{O}_2\text{Na}$   $[\text{M}+\text{Na}]^+$ : 502.1968, found: 502.1976.

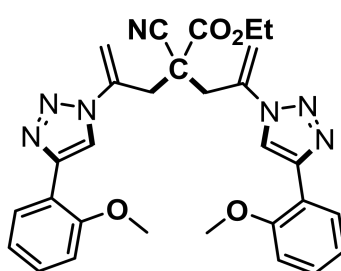

**(3b) 0.25 mmol scale:** Prepared following the general procedure showed above using 2-methoxyphenylacetylene (64.7  $\mu\text{L}$ , 0.5 mmol, 2.0 eq.), **VA** (224.8 mg, 0.55 mmol, 2.2 eq.), ethyl cyanoacetate (26.6  $\mu\text{L}$ , 0.25 mmol, 1.0 eq.), triethylamine ( $\text{Et}_3\text{N}$ ) (139.0  $\mu\text{L}$ , 1.0 mmol, 4.0 eq.),  $\text{CuI}$  (190.4 mg, 0.1 mmol, 0.4 eq.) and  $\text{Pd}(\text{PPh}_3)_4$  (11.5 mg, 0.01 mmol, 0.04 eq.). The desired product was purified by a silica gel column chromatography (petroleum ether/ethyl acetate=2:1) as yellow oily liquid (474.85 mg,

88%); **<sup>1</sup>H NMR** (400 MHz, CDCl<sub>3</sub>) δ 8.41–8.30 (m, 2H), 8.29 (s, 2H), 7.40–7.29 (m, 2H), 7.11–7.03 (m, 2H), 6.99 (d, *J* = 8.3 Hz, 2H), 5.63 (d, *J* = 2.1 Hz, 2H), 5.33 (d, *J* = 2.0 Hz, 2H), 3.96 (s, 6H), 3.95–3.88 (m, 2H), 3.71 (d, *J* = 14.9 Hz, 2H), 3.49 (d, *J* = 14.9 Hz, 2H), 1.14 (t, *J* = 7.2 Hz, 3H); **<sup>13</sup>C NMR** (100 MHz, CDCl<sub>3</sub>) δ 166.6, 155.8, 143.7, 137.7, 129.3, 127.9, 121.1, 121.0, 118.7, 116.8, 110.8, 109.5, 63.7, 55.5, 49.0, 39.1, 13.6; **HRMS** (ESI) *m/z* calculated for C<sub>29</sub>H<sub>29</sub>N<sub>7</sub>O<sub>4</sub>Na [M+Na]<sup>+</sup>: 562.2179, found: 562.2149.

---

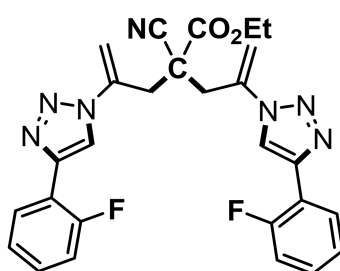

**(3c) 0.25 mmol scale:** Prepared following the general procedure showed above using 2-fluorophenylacetylene (60.1 mg, 0.5 mmol, 2.0 eq.), **VA** (224.8 mg, 0.55 mmol, 2.2 eq.), ethyl cyanoacetate (26.6 μL, 0.25 mmol, 1.0 eq.), triethylamine (Et<sub>3</sub>N) (139.0 μL, 1.0 mmol, 4.0 eq.), CuI (190.4 mg, 0.1 mmol, 0.4 eq.) and Pd(PPh<sub>3</sub>)<sub>4</sub> (11.5 mg, 0.01 mmol, 0.04 eq.). The desired product was purified by a silica gel column chromatography (petroleum ether/ethyl acetate=2:1) as yellow oily liquid (226.83 mg, 88%); **<sup>1</sup>H NMR** (400 MHz, CDCl<sub>3</sub>) δ 8.34–8.26 (m, 2H), 8.19 (d, *J* = 3.4 Hz, 2H), 7.37–7.29 (m, 2H), 7.28–7.21 (m, 2H), 7.19–7.08 (m, 2H), 5.65 (d, *J* = 2.3 Hz, 2H), 5.37 (d, *J* = 2.2 Hz, 2H), 3.98 (q, *J* = 7.2 Hz, 2H), 3.70 (d, *J* = 14.9 Hz, 2H), 3.52 (d, *J* = 14.9 Hz, 2H), 1.17 (t, *J* = 7.2 Hz, 3H); **<sup>13</sup>C NMR** (100 MHz, CDCl<sub>3</sub>) δ 166.6, 160.6 (d, *J* = 249.1 Hz), 141.7, 137.6, 129.8 (d, *J* = 8.6 Hz), 128.0 (d, *J* = 3.4 Hz), 124.7 (d, *J* = 3.4 Hz), 121.0 (d, *J* = 13.2 Hz), 118.0 (d, *J* = 13.2 Hz), 116.5, 115.9 (d, *J* = 21.3 Hz), 110.2, 63.7, 48.7, 39.1, 13.7; **<sup>19</sup>F NMR** (376 MHz, CDCl<sub>3</sub>) δ -114.12; **HRMS** (ESI) *m/z* calculated for C<sub>27</sub>H<sub>23</sub>F<sub>2</sub>N<sub>7</sub>O<sub>2</sub>Na [M+Na]<sup>+</sup>: 538.1779, found: 538.1787.

---



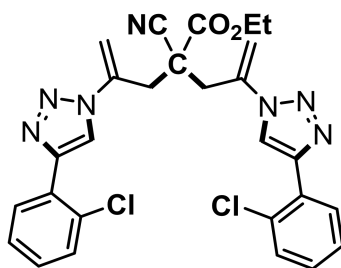

**(3d) 0.25 mmol scale:** Prepared following the general procedure showed above using 2-chlorophenylacetylene (68.3 mg, 0.5 mmol, 2.0 eq.), VA (224.8 mg, 0.55 mmol, 2.2 eq.), ethyl cyanoacetate (26.6  $\mu\text{L}$ , 0.25 mmol, 1.0 eq.), triethylamine ( $\text{Et}_3\text{N}$ ) (139.0  $\mu\text{L}$ , 1.0 mmol, 4.0 eq.), CuI (190.4 mg, 0.1 mmol, 0.4 eq.) and  $\text{Pd}(\text{PPh}_3)_4$  (11.5 mg, 0.01 mmol, 0.04 eq.). The desired product was purified by a silica gel column chromatography (petroleum ether/ethyl acetate=2:1) as yellow oily liquid (244.05 mg, 89%);  $^1\text{H NMR}$  (400 MHz,  $\text{CDCl}_3$ )  $\delta$  8.44 (s, 2H), 8.26–8.20 (m, 2H), 7.47–7.42 (m, 2H), 7.40–7.36 (m, 2H), 7.32–7.26 (m, 2H), 5.66 (d,  $J = 2.3$  Hz, 2H), 5.38 (d,  $J = 2.2$  Hz, 2H), 3.98 (q,  $J = 7.2$  Hz, 2H), 3.71 (d,  $J = 14.9$  Hz, 2H), 3.51 (d,  $J = 14.9$  Hz, 2H), 1.17 (t,  $J = 7.2$  Hz, 3H);  $^{13}\text{C NMR}$  (100 MHz,  $\text{CDCl}_3$ )  $\delta$  166.6, 144.5, 137.6, 131.4, 130.3, 129.9, 129.4, 128.5, 127.2, 121.5, 116.6, 110.4, 63.8, 48.8, 39.2, 13.7; **HRMS** (ESI)  $m/z$  calculated for  $\text{C}_{27}\text{H}_{23}\text{Cl}_2\text{N}_7\text{O}_2\text{Na}$   $[\text{M}+\text{Na}]^+$ : 570.1188, found: 570.1149.

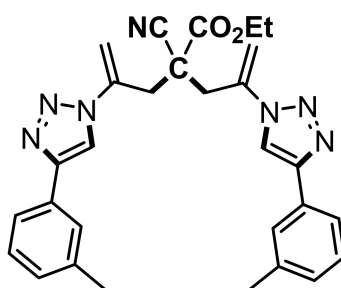

**(3e) 0.25 mmol scale:** Prepared following the general procedure showed above using 3-ethynyltoluene (63.4  $\mu\text{L}$ , 0.5 mmol, 2.0 eq.), VA (224.8 mg, 0.55 mmol, 2.2 eq.), ethyl cyanoacetate (26.6  $\mu\text{L}$ , 0.25 mmol, 1.0 eq.), triethylamine ( $\text{Et}_3\text{N}$ ) (139.0  $\mu\text{L}$ , 1.0 mmol, 4.0 eq.), CuI (190.4 mg, 0.1 mmol, 0.4 eq.) and  $\text{Pd}(\text{PPh}_3)_4$  (11.5 mg, 0.01 mmol, 0.04 eq.). The desired product was purified by a silica gel column chromatography (petroleum ether/ethyl acetate=2:1) as yellow oily liquid (220.81 mg, 87%);  $^1\text{H NMR}$  (400 MHz,  $\text{CDCl}_3$ )  $\delta$  8.02 (s, 2H), 7.69 (s, 2H), 7.62 (d,  $J = 7.7$  Hz,

2H), 7.31 (t,  $J = 7.6$  Hz, 2H), 7.16 (d,  $J = 7.6$  Hz, 2H), 5.60 (d,  $J = 2.2$  Hz, 2H), 5.32 (d,  $J = 1.9$  Hz, 2H), 3.95 (q,  $J = 7.2$  Hz, 2H), 3.67 (d,  $J = 14.9$  Hz, 2H), 3.47 (d,  $J = 14.9$  Hz, 2H), 2.39 (s, 6H), 1.15 (t,  $J = 7.2$  Hz, 3H);  $^{13}\text{C}$  NMR (100 MHz,  $\text{CDCl}_3$ )  $\delta$  166.6, 148.3, 138.6, 137.7, 129.7, 129.4, 128.8, 126.6, 123.0, 118.0, 116.6, 110.0, 63.8, 48.9, 39.0, 21.4, 13.7; HRMS (ESI)  $m/z$  calculated for  $\text{C}_{29}\text{H}_{29}\text{N}_7\text{O}_2\text{Na}$   $[\text{M}+\text{Na}]^+$ : 530.2281, found: 530.2251.

---

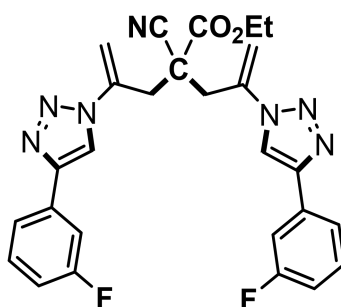

**(3f) 0.25 mmol scale:** Prepared following the general procedure showed above using 3-fluorophenylacetylene (60.1 mg, 0.5 mmol, 2.0 eq.), VA (224.8 mg, 0.55 mmol, 2.2 eq.), ethyl cyanoacetate (26.6  $\mu\text{L}$ , 0.25 mmol, 1.0 eq.), triethylamine ( $\text{Et}_3\text{N}$ ) (139.0  $\mu\text{L}$ , 1.0 mmol, 4.0 eq.),  $\text{CuI}$  (190.4 mg, 0.1 mmol, 0.4 eq.) and  $\text{Pd}(\text{PPh}_3)_4$  (11.5 mg, 0.01 mmol, 0.04 eq.). The desired product was purified by a silica gel column chromatography (petroleum ether/ethyl acetate=2:1) as yellow oily liquid (213.95 mg, 83%);  $^1\text{H}$  NMR (400 MHz,  $\text{CDCl}_3$ )  $\delta$  8.05 (s, 2H), 7.65–7.52 (m, 4H), 7.42–7.35 (m, 2H), 7.07–7.01 (m, 2H), 5.62 (d,  $J = 2.3$  Hz, 2H), 5.35 (d,  $J = 2.2$  Hz, 2H), 3.99 (q,  $J = 7.2$  Hz, 2H), 3.67 (d,  $J = 14.8$  Hz, 2H), 3.49 (d,  $J = 14.9$  Hz, 2H), 1.18 (t,  $J = 7.2$  Hz, 3H);  $^{13}\text{C}$  NMR (100 MHz,  $\text{CDCl}_3$ )  $\delta$  166.6, 164.4 (d,  $J = 245.4$  Hz), 147.1 (d,  $J = 2.9$  Hz), 137.6, 132.0 (d,  $J = 8.5$  Hz), 130.6 (d,  $J = 8.5$  Hz), 121.5 ( $J = 2.9$  Hz), 118.5, 116.4, 115.5 (d,  $J = 22.0$  Hz), 113.0 (d,  $J = 22.0$  Hz), 110.4, 63.8, 48.8, 39.0, 13.8;  $^{19}\text{F}$  NMR (376 MHz,  $\text{CDCl}_3$ )  $\delta$  -112.38; HRMS (ESI)  $m/z$  calculated for  $\text{C}_{27}\text{H}_{23}\text{F}_2\text{N}_7\text{O}_2\text{Na}$   $[\text{M}+\text{Na}]^+$ : 538.1779, found: 538.1771.

---

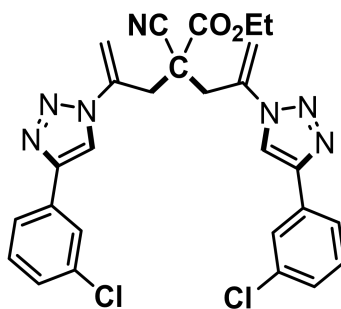

**(3g) 0.25 mmol scale:** Prepared following the general procedure showed above using 3-chlorophenylacetylene (68.3 mg, 0.5 mmol, 2.0 eq.), **VA** (224.8 mg, 0.55 mmol, 2.2 eq.), ethyl cyanoacetate (26.6  $\mu\text{L}$ , 0.25 mmol, 1.0 eq.), triethylamine ( $\text{Et}_3\text{N}$ ) (139.0  $\mu\text{L}$ , 1.0 mmol, 4.0 eq.),  $\text{CuI}$  (190.4 mg, 0.1 mmol, 0.4 eq.) and  $\text{Pd}(\text{PPh}_3)_4$  (11.5 mg, 0.01 mmol, 0.04 eq.). The desired product was purified by a silica gel column chromatography (petroleum ether/ethyl acetate=2:1) as yellow oily liquid (233.08 mg, 85%);  $^1\text{H NMR}$  (400 MHz,  $\text{CDCl}_3$ )  $\delta$  8.05 (s, 2H), 7.85 (s, 2H), 7.77–7.70 (m, 2H), 7.41–7.30 (m, 4H), 5.62 (d,  $J = 2.3$  Hz, 2H), 5.36 (d,  $J = 2.0$  Hz, 2H), 4.00 (q,  $J = 7.1$  Hz, 2H), 3.67 (d,  $J = 14.8$  Hz, 2H), 3.49 (d,  $J = 14.8$  Hz, 2H), 1.19 (t,  $J = 7.2$  Hz, 3H);  $^{13}\text{C NMR}$  (100 MHz,  $\text{CDCl}_3$ )  $\delta$  166.6, 147.0, 137.6, 134.9, 131.6, 130.2, 128.6, 126.0, 124.0, 118.4, 116.4, 110.4, 63.8, 48.8, 39.0, 13.8; **HRMS** (ESI)  $m/z$  calculated for  $\text{C}_{27}\text{H}_{23}\text{Cl}_2\text{N}_7\text{O}_2\text{Na}$   $[\text{M}+\text{Na}]^+$ : 570.1188, found: 570.1149.

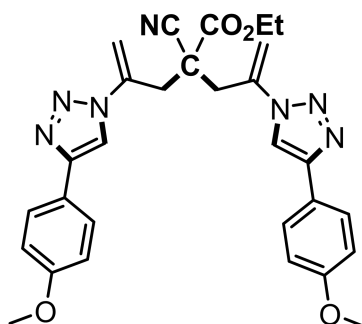

**(3h) 0.25 mmol scale:** Prepared following the general procedure showed above using 4-ethynylanisole (64.8  $\mu\text{L}$ , 0.5 mmol, 2.0 eq.), **VA** (224.8 mg, 0.55 mmol, 2.2 eq.), ethyl cyanoacetate (26.6  $\mu\text{L}$ , 0.25 mmol, 1.0 eq.), triethylamine ( $\text{Et}_3\text{N}$ ) (139.0  $\mu\text{L}$ , 1.0 mmol, 4.0 eq.),  $\text{CuI}$  (190.4 mg, 0.1 mmol, 0.4 eq.) and  $\text{Pd}(\text{PPh}_3)_4$  (11.5 mg, 0.01 mmol, 0.04 eq.). The desired product was purified by a silica gel column chromatography (petroleum ether/ethyl acetate=2:1) as yellow oily liquid (215.83 mg,

80%);  $^1\text{H NMR}$  (400 MHz,  $\text{CDCl}_3$ )  $\delta$  7.94 (s, 2H), 7.80–7.73 (m, 4H), 6.98–6.93 (m, 4H), 5.59 (d,  $J = 2.2$  Hz, 2H), 5.32 (d,  $J = 2.1$  Hz, 2H), 3.97 (q,  $J = 7.2$  Hz, 2H), 3.84 (s, 6H), 3.67 (d,  $J = 14.9$  Hz, 2H), 3.47 (d,  $J = 14.9$  Hz, 2H), 1.16 (t,  $J = 7.2$  Hz, 3H);  $^{13}\text{C NMR}$  (100 MHz,  $\text{CDCl}_3$ ) 166.7, 159.9, 148.1, 137.7, 127.3, 122.5, 117.1, 116.6, 114.3, 109.7, 63.7, 55.4, 48.9, 39.0, 13.7; **HRMS** (ESI)  $m/z$  calculated for  $\text{C}_{29}\text{H}_{29}\text{N}_7\text{O}_4\text{Na}$   $[\text{M}+\text{Na}]^+$ : 526.2179, found: 526.2170.

---

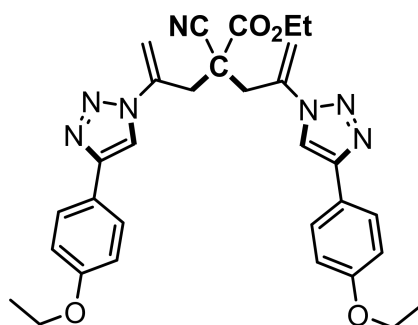

**(3i) 0.25 mmol scale:** Prepared following the general procedure showed above using 4-ethoxyphenylacetylene (73.8  $\mu\text{L}$ , 0.5 mmol, 2.0 eq.), **VA** (224.8 mg, 0.55 mmol, 2.2 eq.), ethyl cyanoacetate (26.6  $\mu\text{L}$ , 0.25 mmol, 1.0 eq.), triethylamine ( $\text{Et}_3\text{N}$ ) (139.0  $\mu\text{L}$ , 1.0 mmol, 4.0 eq.),  $\text{CuI}$  (190.4 mg, 0.1 mmol, 0.4 eq.) and  $\text{Pd}(\text{PPh}_3)_4$  (11.5 mg, 0.01 mmol, 0.04 eq.). The desired product was purified by a silica gel column chromatography (petroleum ether/ethyl acetate=2:1) as yellow oily liquid (249.60 mg, 88%);  $^1\text{H NMR}$  (400 MHz,  $\text{CDCl}_3$ )  $\delta$  7.94 (s, 2H), 7.80–7.70 (m, 4H), 7.01–6.84 (m, 4H), 5.59 (d,  $J = 2.2$  Hz, 2H), 5.31 (d,  $J = 2.1$  Hz, 2H), 4.06 (q,  $J = 7.0$  Hz, 4H), 3.96 (q,  $J = 7.1$  Hz, 2H), 3.66 (d,  $J = 14.9$  Hz, 2H), 3.47 (d,  $J = 14.9$  Hz, 2H), 1.43 (t,  $J = 7.0$  Hz, 6H), 1.15 (t,  $J = 7.2$  Hz, 3H);  $^{13}\text{C NMR}$  (100 MHz,  $\text{CDCl}_3$ )  $\delta$  166.7, 159.3, 148.2, 137.7, 127.2, 122.3, 117.0, 116.6, 114.8, 109.7, 63.7, 63.5, 48.9, 39.0, 14.8, 13.7; **HRMS** (ESI)  $m/z$  calculated for  $\text{C}_{31}\text{H}_{33}\text{N}_7\text{O}_4\text{Na}$   $[\text{M}+\text{Na}]^+$ : 590.2492, found: 590.2510.

---

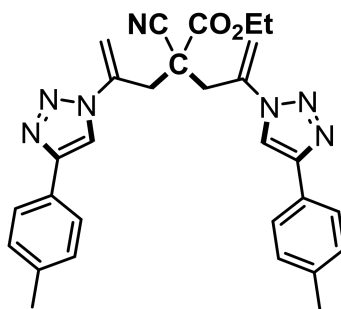

**(3j) 0.25 mmol scale:** Prepared following the general procedure showed above using 4-ethynyltoluene (63.4  $\mu$ L, 0.5 mmol, 2.0 eq.), VA (224.8 mg, 0.55 mmol, 2.2 eq.), ethyl cyanoacetate (26.6  $\mu$ L, 0.25 mmol, 1.0 eq.), triethylamine ( $\text{Et}_3\text{N}$ ) (139.0  $\mu$ L, 1.0 mmol, 4.0 eq.), CuI (190.4 mg, 0.1 mmol, 0.4 eq.) and  $\text{Pd}(\text{PPh}_3)_4$  (11.5 mg, 0.01 mmol, 0.04 eq.). The desired product was purified by a silica gel column chromatography (petroleum ether/ethyl acetate=2:1) as yellow oily liquid (223.33 mg, 88%);  $^1\text{H NMR}$  (400 MHz,  $\text{CDCl}_3$ )  $\delta$  7.98 (s, 2H), 7.73 (d,  $J = 8.1$  Hz, 4H), 7.24 (d,  $J = 8.0$  Hz, 4H), 5.60 (d,  $J = 2.2$  Hz, 2H), 5.33 (d,  $J = 2.1$  Hz, 2H), 3.95 (q,  $J = 7.2$  Hz, 2H), 3.68 (d,  $J = 14.9$  Hz, 2H), 3.47 (d,  $J = 14.9$  Hz, 2H), 2.38 (s, 6H), 1.15 (t,  $J = 7.2$  Hz, 3H);  $^{13}\text{C NMR}$  (100 MHz,  $\text{CDCl}_3$ )  $\delta$  166.6, 148.3, 138.5, 137.7, 129.6, 127.0, 125.8, 117.5, 116.6, 109.8, 63.8, 48.9, 39.0, 21.3, 13.7; **HRMS** (ESI)  $m/z$  calculated for  $\text{C}_{29}\text{H}_{29}\text{N}_7\text{O}_2\text{Na}$   $[\text{M}+\text{Na}]^+$ : 530.2281, found: 530.2280.

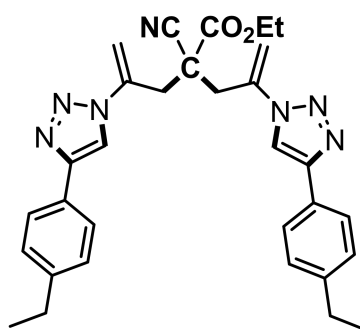

**(3k) 0.25 mmol scale:** Prepared following the general procedure showed above using 4-ethynyltoluene (63.4  $\mu$ L, 0.5 mmol, 2.0 eq.), VA (224.8 mg, 0.55 mmol, 2.2 eq.), ethyl cyanoacetate (26.6  $\mu$ L, 0.25 mmol, 1.0 eq.), triethylamine ( $\text{Et}_3\text{N}$ ) (139.0  $\mu$ L, 1.0 mmol, 4.0 eq.), CuI (190.4 mg, 0.1 mmol, 0.4 eq.) and  $\text{Pd}(\text{PPh}_3)_4$  (11.5 mg,

0.01 mmol, 0.04 eq.). The desired product was purified by a silica gel column chromatography (petroleum ether/ethyl acetate=2:1) as yellow oily liquid (222.30 mg, 83%);  $^1\text{H NMR}$  (400 MHz,  $\text{CDCl}_3$ )  $\delta$  7.99 (s, 2H), 7.81–7.70 (m, 4H), 7.26 (d,  $J = 8.3$  Hz, 4H), 5.60 (d,  $J = 2.2$  Hz, 2H), 5.33 (d,  $J = 2.1$  Hz, 2H), 3.95 (q,  $J = 7.2$  Hz, 2H), 3.68 (d,  $J = 14.9$  Hz, 2H), 3.47 (d,  $J = 14.9$  Hz, 2H), 2.68 (q,  $J = 7.6$  Hz, 4H), 1.26 (t,  $J = 7.6$  Hz, 6H), 1.15 (t,  $J = 7.2$  Hz, 3H);  $^{13}\text{C NMR}$  (100 MHz,  $\text{CDCl}_3$ )  $\delta$  166.6, 148.3, 144.9, 137.7, 128.4, 127.3, 125.9, 117.6, 116.6, 109.8, 63.8, 48.9, 39.0, 28.7, 15.5, 13.7; **HRMS** (ESI)  $m/z$  calculated for  $\text{C}_{31}\text{H}_{33}\text{N}_7\text{O}_2\text{Na}$   $[\text{M}+\text{Na}]^+$ : 558.2594, found: 558.2592.

---

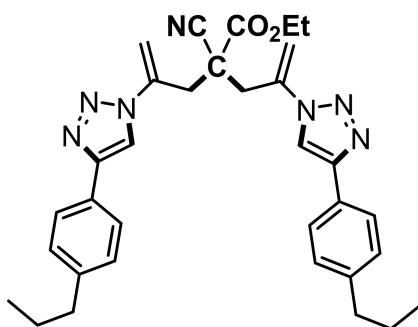

**(3l) 0.25 mmol scale:** Prepared following the general procedure showed above using 1-eth-1-ynyl-4-propylbenzene (79.2  $\mu\text{L}$ , 0.5 mmol, 2.0 eq.), **VA** (224.8 mg, 0.55 mmol, 2.2 eq.), ethyl cyanoacetate (26.6  $\mu\text{L}$ , 0.25 mmol, 1.0 eq.), triethylamine ( $\text{Et}_3\text{N}$ ) (139.0  $\mu\text{L}$ , 1.0 mmol, 4.0 eq.),  $\text{CuI}$  (190.4 mg, 0.1 mmol, 0.4 eq.) and  $\text{Pd}(\text{PPh}_3)_4$  (11.5 mg, 0.01 mmol, 0.04 eq.). The desired product was purified by a silica gel column chromatography (petroleum ether/ethyl acetate=2:1) as yellow oily liquid (247.86 mg, 88%);  $^1\text{H NMR}$  (400 MHz,  $\text{CDCl}_3$ )  $\delta$  7.99 (s, 2H), 7.77–7.73 (m, 4H), 7.25–7.21 (m, 4H), 5.59 (d,  $J = 2.2$  Hz, 2H), 5.32 (s, 2H), 3.95 (q,  $J = 7.2$  Hz, 2H), 3.65 (s, 2H), 3.46 (d,  $J = 14.9$  Hz, 2H), 2.65–2.56 (m, 4H), 1.71–1.60 (m, 4H), 1.15 (t,  $J = 7.2$  Hz, 3H), 0.95 (t,  $J = 7.3$  Hz, 6H);  $^{13}\text{C NMR}$  (100 MHz,  $\text{CDCl}_3$ )  $\delta$  166.6, 148.3, 143.3, 137.7, 129.0, 127.3, 125.8, 117.6, 116.6, 109.8, 63.7, 48.9, 39.0, 37.8, 24.5, 13.8, 13.7; **HRMS** (ESI)  $m/z$  calculated for  $\text{C}_{33}\text{H}_{37}\text{N}_7\text{O}_2\text{Na}$   $[\text{M}+\text{Na}]^+$ : 586.2907, found: 586.2910.

---

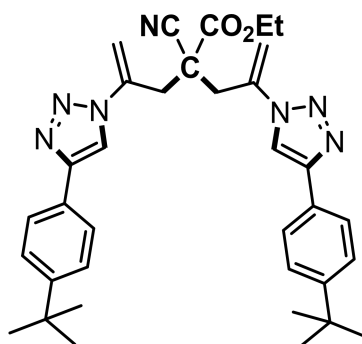

**(3m) 0.25 mmol scale:** Prepared following the general procedure showed above using 4-tert-butylphenylacetylene (90.2  $\mu\text{L}$ , 0.5 mmol, 2.0 eq.), VA (224.8 mg, 0.55 mmol, 2.2 eq.), ethyl cyanoacetate (26.6  $\mu\text{L}$ , 0.25 mmol, 1.0 eq.), triethylamine ( $\text{Et}_3\text{N}$ ) (139.0  $\mu\text{L}$ , 1.0 mmol, 4.0 eq.), CuI (190.4 mg, 0.1 mmol, 0.4 eq.) and  $\text{Pd}(\text{PPh}_3)_4$  (11.5 mg, 0.01 mmol, 0.04 eq.). The desired product was purified by a silica gel column chromatography (petroleum ether/ethyl acetate=2:1) as yellow oily liquid (239.67 mg, 81%);  $^1\text{H NMR}$  (400 MHz,  $\text{CDCl}_3$ )  $\delta$  8.00 (s, 2H), 7.80–7.75 (m, 4H), 7.49–7.43 (m, 4H), 5.61 (d,  $J = 2.2$  Hz, 2H), 5.33 (d,  $J = 2.1$  Hz, 2H), 3.95 (q,  $J = 7.2$  Hz, 2H), 3.68 (d,  $J = 14.9$  Hz, 2H), 3.47 (d,  $J = 14.9$  Hz, 2H), 1.34 (s, 18H), 1.16 (t,  $J = 7.2$  Hz, 3H);  $^{13}\text{C NMR}$  (100 MHz,  $\text{CDCl}_3$ )  $\delta$  166.6, 151.8, 148.3, 137.7, 127.0, 125.8, 125.7, 117.6, 116.6, 109.8, 63.7, 48.9, 39.0, 34.7, 31.3, 13.7; **HRMS** (ESI)  $m/z$  calculated for  $\text{C}_{35}\text{H}_{41}\text{N}_7\text{O}_2\text{Na}$   $[\text{M}+\text{Na}]^+$ : 614.3220, found: 614.3297.

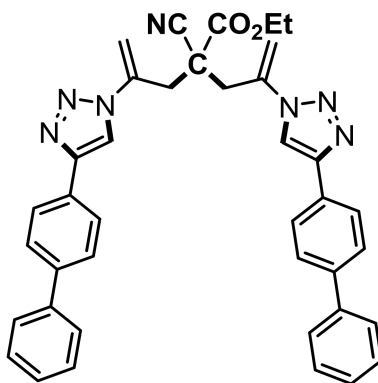

**(3n) 0.25 mmol scale:** Prepared following the general procedure showed above using 4-ethynyl-1,1'-biphenyl (89.1 mg, 0.5 mmol, 2.0 eq.), VA (224.8 mg, 0.55 mmol,

2.2 eq.), ethyl cyanoacetate (26.6  $\mu\text{L}$ , 0.25 mmol, 1.0 eq.), triethylamine ( $\text{Et}_3\text{N}$ ) (139.0  $\mu\text{L}$ , 1.0 mmol, 4.0 eq.),  $\text{CuI}$  (190.4 mg, 0.1 mmol, 0.4 eq.) and  $\text{Pd}(\text{PPh}_3)_4$  (11.5 mg, 0.01 mmol, 0.04 eq.). The desired product was purified by a silica gel column chromatography (petroleum ether/ethyl acetate=5:3) as yellow oily liquid (262.17 mg, 83%);  $^1\text{H NMR}$  (400 MHz,  $\text{CDCl}_3$ )  $\delta$  8.06 (s, 2H), 7.93 (d,  $J = 8.3$  Hz, 4H), 7.67 (d,  $J = 8.3$  Hz, 4H), 7.65–7.58 (m, 4H), 7.45 (t,  $J = 7.5$  Hz, 4H), 7.36 (t,  $J = 7.3$  Hz, 2H), 5.64 (d,  $J = 2.2$  Hz, 2H), 5.37 (d,  $J = 2.1$  Hz, 2H), 4.00 (q,  $J = 7.1$  Hz, 2H), 3.71 (d,  $J = 14.9$  Hz, 2H), 3.51 (d,  $J = 14.9$  Hz, 2H), 1.19 (t,  $J = 7.2$  Hz, 3H);  $^{13}\text{C NMR}$  (100 MHz,  $\text{CDCl}_3$ )  $\delta$  166.7, 148.0, 141.4, 140.5, 137.7, 128.9, 128.8, 127.6, 127.6, 127.0, 126.3, 117.9, 116.6, 110.0, 63.8, 48.9, 39.0, 13.8; **HRMS** (ESI)  $m/z$  calculated for  $\text{C}_{39}\text{H}_{33}\text{N}_7\text{O}_2\text{Na}$   $[\text{M}+\text{Na}]^+$ : 654.2594, found: 654.2556.

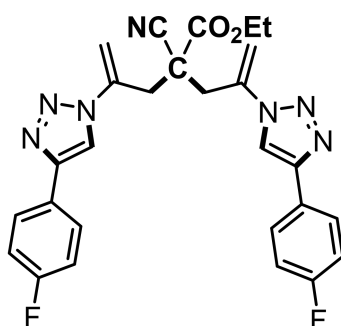

**(30) 0.25 mmol scale:** Prepared following the general procedure showed above using 4-fluorophenylacetylene (57.3  $\mu\text{L}$ , 0.5 mmol, 2.0 eq.), **VA** (224.8 mg, 0.55 mmol, 2.2 eq.), ethyl cyanoacetate (26.6  $\mu\text{L}$ , 0.25 mmol, 1.0 eq.), triethylamine ( $\text{Et}_3\text{N}$ ) (139.0  $\mu\text{L}$ , 1.0 mmol, 4.0 eq.),  $\text{CuI}$  (190.4 mg, 0.1 mmol, 0.4 eq.) and  $\text{Pd}(\text{PPh}_3)_4$  (11.5 mg, 0.01 mmol, 0.04 eq.). The desired product was purified by a silica gel column chromatography (petroleum ether/ethyl acetate=2:1) as yellow oily liquid (219.09 mg, 85%);  $^1\text{H NMR}$  (400 MHz,  $\text{CDCl}_3$ )  $\delta$  8.00 (s, 2H), 7.87–7.71 (m, 4H), 7.12 (t,  $J = 8.7$  Hz, 4H), 5.61 (d,  $J = 2.2$  Hz, 2H), 5.34 (d,  $J = 2.0$  Hz, 2H), 4.00 (q,  $J = 7.2$  Hz, 2H), 3.67 (d,  $J = 14.9$  Hz, 2H), 3.49 (d,  $J = 14.8$  Hz, 2H), 1.18 (t,  $J = 7.2$  Hz, 3H);  $^{13}\text{C NMR}$  (100 MHz,  $\text{CDCl}_3$ )  $\delta$  166.8, 164.2 (d,  $J = 248.0$  Hz), 147.5, 137.7, 127.7 (d,  $J = 8.3$  Hz), 126.0 (d,  $J = 3.3$  Hz), 117.8, 116.5, 116.1 (d,  $J = 21.8$  Hz), 110.1, 63.8, 48.8,



39.0, 13.8;  $^{19}\text{F}$  NMR (376 MHz,  $\text{CDCl}_3$ )  $\delta$  -112.74; HRMS (ESI)  $m/z$  calculated for  $\text{C}_{27}\text{H}_{23}\text{F}_2\text{N}_7\text{O}_2\text{Na}$   $[\text{M}+\text{Na}]^+$ : 538.1179, found: 538.1787.

---

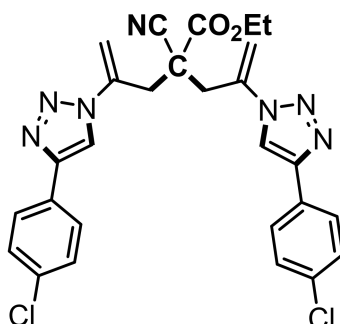

**(3p) 0.25 mmol scale:** Prepared following the general procedure showed above using 4-chlorophenylacetylene (68,3 mg, 0.5 mmol, 2.0 eq.), VA (224.8 mg, 0.55 mmol, 2.2 eq.), ethyl cyanoacetate (26.6  $\mu\text{L}$ , 0.25 mmol, 1.0 eq.), triethylamine ( $\text{Et}_3\text{N}$ ) (139.0  $\mu\text{L}$ , 1.0 mmol, 4.0 eq.),  $\text{CuI}$  (190.4 mg, 0.1 mmol, 0.4 eq.) and  $\text{Pd}(\text{PPh}_3)_4$  (11.5 mg, 0.01 mmol, 0.04 eq.). The desired product was purified by a silica gel column chromatography (petroleum ether/ethyl acetate=2:1) as yellow oily liquid (238.00 mg, 87%);  $^1\text{H}$  NMR (400 MHz,  $\text{CDCl}_3$ )  $\delta$  8.02 (s, 2H), 7.81–7.75 (m, 4H), 7.43–7.36 (m, 4H), 5.61 (d,  $J = 2.3$  Hz, 2H), 5.35 (d,  $J = 2.2$  Hz, 2H), 3.99 (q,  $J = 7.2$  Hz, 2H), 3.66 (d,  $J = 14.8$  Hz, 2H), 3.49 (d,  $J = 14.9$  Hz, 2H), 1.18 (t,  $J = 7.2$  Hz, 3H);  $^{13}\text{C}$  NMR (100 MHz,  $\text{CDCl}_3$ )  $\delta$  166.6, 147.2, 137.6, 134.4, 129.1, 128.3, 127.2, 118.1, 116.4, 110.2, 63.8, 48.8, 39.0, 13.8; HRMS (ESI)  $m/z$  calculated for  $\text{C}_{27}\text{H}_{23}\text{Cl}_2\text{N}_7\text{O}_2\text{Na}$   $[\text{M}+\text{Na}]^+$ : 570.1188, found: 570.1149.

---

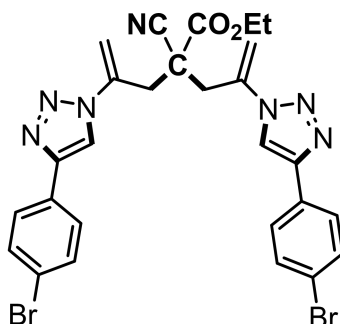

**(3q) 0.25 mmol scale:** Prepared following the general procedure showed above using 4-bromophenylacetylene (63.5  $\mu\text{L}$ , 0.5 mmol, 2.0 eq.), VA (224.8 mg, 0.55 mmol, 2.2 eq.), ethyl cyanoacetate (26.6  $\mu\text{L}$ , 0.25 mmol, 1.0 eq.), triethylamine ( $\text{Et}_3\text{N}$ )

(139.0  $\mu\text{L}$ , 1.0 mmol, 4.0 eq.), CuI (190.4 mg, 0.1 mmol, 0.4 eq.) and Pd(PPh<sub>3</sub>)<sub>4</sub> (11.5 mg, 0.01 mmol, 0.04 eq.). The desired product was purified by a silica gel column chromatography (petroleum ether/ethyl acetate=2:1) as yellow oily liquid (263.66 mg, 83%); <sup>1</sup>H NMR (400 MHz, CDCl<sub>3</sub>)  $\delta$  8.03 (s, 2H), 7.75–7.70 (m, 4H), 7.59–7.53 (m, 4H), 5.61 (d,  $J$  = 2.2 Hz, 2H), 5.36 (d,  $J$  = 2.8 Hz, 2H), 4.00 (q,  $J$  = 6.2 Hz, 2H), 3.69 (d,  $J$  = 12.9 Hz, 2H), 3.48 (d,  $J$  = 14.8 Hz, 2H), 1.18 (t,  $J$  = 7.4 Hz, 3H); <sup>13</sup>C NMR (100 MHz, CDCl<sub>3</sub>)  $\delta$  166.6, 147.3, 137.6, 132.1, 128.8, 127.4, 122.6, 118.1, 116.4, 110.3, 63.8, 48.8, 39.0, 13.8; HRMS (ESI)  $m/z$  calculated for C<sub>27</sub>H<sub>23</sub>Br<sub>2</sub>N<sub>7</sub>O<sub>2</sub>Na [M+Na]<sup>+</sup>: 660.0157, found: 660.0208.

---

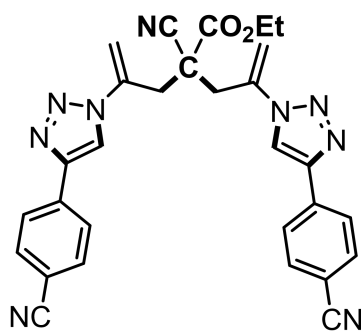

**(3r) 0.25 mmol scale:** Prepared following the general procedure showed above using 4-cyanophenylacetylene (63.5 mg, 0.5 mmol, 2.0 eq.), VA (224.8 mg, 0.55 mmol, 2.2 eq.), ethyl cyanoacetate (26.6  $\mu\text{L}$ , 0.25 mmol, 1.0 eq.), triethylamine (Et<sub>3</sub>N) (139.0  $\mu\text{L}$ , 1.0 mmol, 4.0 eq.), CuI (190.4 mg, 0.1 mmol, 0.4 eq.) and Pd(PPh<sub>3</sub>)<sub>4</sub> (11.5 mg, 0.01 mmol, 0.04 eq.). The desired product was purified by a silica gel column chromatography (petroleum ether/ethyl acetate=2:1) as yellow oily liquid (227.71 mg, 86%); <sup>1</sup>H NMR (400 MHz, CDCl<sub>3</sub>)  $\delta$  8.14 (s, 2H), 7.99–7.89 (m, 4H), 7.80–7.65 (m, 4H), 5.65 (d,  $J$  = 2.3 Hz, 2H), 5.40 (d,  $J$  = 2.3 Hz, 2H), 4.03 (q,  $J$  = 7.2 Hz, 2H), 3.68 (d,  $J$  = 14.8 Hz, 2H), 3.52 (d,  $J$  = 14.8 Hz, 2H), 1.21 (t,  $J$  = 7.2 Hz, 3H); <sup>13</sup>C NMR (100 MHz, CDCl<sub>3</sub>)  $\delta$  166.6, 146.4, 137.6, 134.1, 132.8, 126.3, 119.2, 118.6, 112.1, 110.9, 63.9, 53.5, 48.7, 39.0, 13.8; HRMS (ESI)  $m/z$  calculated for C<sub>29</sub>H<sub>23</sub>N<sub>9</sub>O<sub>2</sub>Na [M+Na]<sup>+</sup>: 552.1872, found: 552.1873.

---

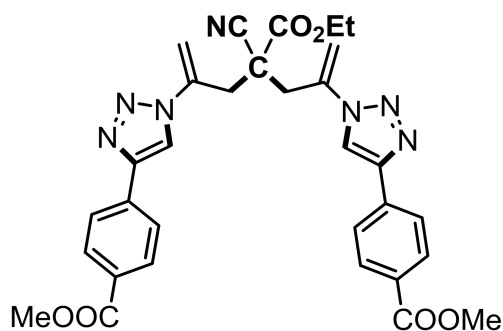

**(3s) 0.25 mmol scale:** Prepared following the general procedure showed above using 4-ethynyl-benzoic acid methyl ester (80.1 mg, 0.5 mmol, 2.0 eq.), **VA** (224.8 mg, 0.55 mmol, 2.2 eq.), ethyl cyanoacetate (26.6  $\mu\text{L}$ , 0.25 mmol, 1.0 eq.), triethylamine ( $\text{Et}_3\text{N}$ ) (139.0  $\mu\text{L}$ , 1.0 mmol, 4.0 eq.),  $\text{CuI}$  (190.4 mg, 0.1 mmol, 0.4 eq.) and  $\text{Pd}(\text{PPh}_3)_4$  (11.5 mg, 0.01 mmol, 0.04 eq.). The desired product was purified by a silica gel column chromatography (petroleum ether/ethyl acetate=5:3) as yellow oily liquid (259.09 mg, 85%);  $^1\text{H NMR}$  (400 MHz,  $\text{CDCl}_3$ )  $\delta$  8.13 (s, 2H), 8.12–8.06 (m, 4H), 7.96–7.89 (m, 4H), 5.64 (d,  $J = 2.3$  Hz, 2H), 5.37 (d,  $J = 2.2$  Hz, 2H), 4.01 (q,  $J = 7.2$  Hz, 2H), 3.94 (s, 6H), 3.68 (d,  $J = 14.9$  Hz, 2H), 3.51 (d,  $J = 14.9$  Hz, 2H), 1.19 (t,  $J = 7.2$  Hz, 3H);  $^{13}\text{C NMR}$  (100 MHz,  $\text{CDCl}_3$ )  $\delta$  166.7, 166.6, 147.2, 137.6, 134.1, 130.3, 130.0, 125.7, 118.9, 116.4, 110.5, 63.9, 52.2, 48.8, 39.0, 13.8; **HRMS** (ESI)  $m/z$  calculated for  $\text{C}_{31}\text{H}_{29}\text{N}_7\text{O}_6\text{Na}$   $[\text{M}+\text{Na}]^+$ : 618.2077, found: 618.2092.

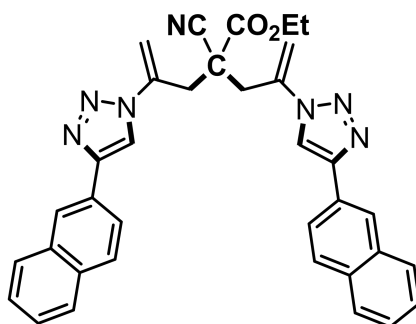

**(3t) 0.25 mmol scale:** Prepared following the general procedure showed above using 2-ethynyl naphthalene (76.10 mg, 0.5 mmol, 2.0 eq.), **VA** (224.8 mg, 0.55 mmol, 2.2 eq.), ethyl cyanoacetate (26.6  $\mu\text{L}$ , 0.25 mmol, 1.0 eq.), triethylamine ( $\text{Et}_3\text{N}$ ) (139.0  $\mu\text{L}$ , 1.0 mmol, 4.0 eq.),  $\text{CuI}$  (190.4 mg, 0.1 mmol, 0.4 eq.) and  $\text{Pd}(\text{PPh}_3)_4$  (11.5 mg, 0.01 mmol, 0.04 eq.). The desired product was purified by a silica gel column chromatography (petroleum ether/ethyl acetate=2:1) as yellow oily liquid (243.46 mg,

84%);  $^1\text{H NMR}$  (400 MHz,  $\text{CDCl}_3$ )  $\delta$  8.37 (s, 2H), 8.14 (s, 2H), 7.96–7.80 (m, 8H), 7.54–7.46 (m, 4H), 5.65 (d,  $J = 2.2$  Hz, 2H), 5.38 (d,  $J = 2.1$  Hz, 2H), 4.00 (q,  $J = 7.2$  Hz, 2H), 3.72 (d,  $J = 14.9$  Hz, 2H), 3.52 (d,  $J = 14.9$  Hz, 2H), 1.17 (t,  $J = 7.2$  Hz, 3H);  $^{13}\text{C NMR}$  (100 MHz,  $\text{CDCl}_3$ )  $\delta$  166.7, 148.4, 137.7, 133.5, 133.3, 128.7, 128.3, 127.8, 127.1, 126.6, 126.4, 124.9, 123.8, 118.2, 116.6, 110.1, 63.8, 48.9, 39.1, 13.8; **HRMS** (ESI)  $m/z$  calculated for  $\text{C}_{35}\text{H}_{29}\text{N}_7\text{O}_2\text{Na}$   $[\text{M}+\text{Na}]^+$ : 602.2281, found: 602.2300.

---

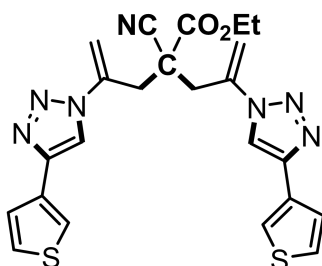

**(3u) 0.25 mmol scale:** Prepared following the general procedure showed above using 2-ethynylthiophene (50.1  $\mu\text{L}$ , 0.5 mmol, 2.0 eq.), **VA** (224.8 mg, 0.55 mmol, 2.2 eq.), ethyl cyanoacetate (26.6  $\mu\text{L}$ , 0.25 mmol, 1.0 eq.), triethylamine ( $\text{Et}_3\text{N}$ ) (139.0  $\mu\text{L}$ , 1.0 mmol, 4.0 eq.),  $\text{CuI}$  (190.4 mg, 0.1 mmol, 0.4 eq.) and  $\text{Pd}(\text{PPh}_3)_4$  (11.5 mg, 0.01 mmol, 0.04 eq.). The desired product was purified by a silica gel column chromatography (petroleum ether/ethyl acetate=2:1) as yellow oily liquid (194.18 mg, 79%);  $^1\text{H NMR}$  (400 MHz,  $\text{CDCl}_3$ )  $\delta$  7.93 (s, 2H), 7.75–7.70 (m, 2H), 7.48–7.43 (m, 2H), 7.41–7.36 (m, 2H), 5.59 (d,  $J = 2.2$  Hz, 2H), 5.33 (d,  $J = 2.2$  Hz, 2H), 3.98 (q,  $J = 7.2$  Hz, 2H), 3.66 (d,  $J = 14.8$  Hz, 2H), 3.48 (d,  $J = 14.9$  Hz, 2H), 1.17 (t,  $J = 7.2$  Hz, 3H);  $^{13}\text{C NMR}$  (100 MHz,  $\text{CDCl}_3$ )  $\delta$  166.6, 144.4, 137.6, 131.0, 126.6, 125.8, 121.9, 117.7, 116.5, 109.9, 63.8, 48.9, 39.0, 13.7; **HRMS** (ESI)  $m/z$  calculated for  $\text{C}_{23}\text{H}_{21}\text{N}_7\text{O}_2\text{S}_2\text{Na}$   $[\text{M}+\text{Na}]^+$ : 514.1096, found: 514.1088.

---

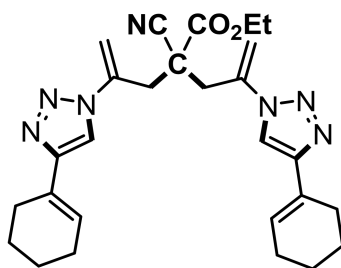

**(3v) 0.25 mmol scale:** Prepared following the general procedure showed above using 1-ethynylcyclohex-1-ene (58.8  $\mu\text{L}$ , 0.5 mmol, 2.0 eq.), VA (224.8 mg, 0.55 mmol, 2.2 eq.), ethyl cyanoacetate (26.6  $\mu\text{L}$ , 0.25 mmol, 1.0 eq.), triethylamine ( $\text{Et}_3\text{N}$ ) (139.0  $\mu\text{L}$ , 1.0 mmol, 4.0 eq.), CuI (190.4 mg, 0.1 mmol, 0.4 eq.) and  $\text{Pd}(\text{PPh}_3)_4$  (11.5 mg, 0.01 mmol, 0.04 eq.). The desired product was purified by a silica gel column chromatography (petroleum ether/ethyl acetate=2:1) as yellow oily liquid (216.99 mg, 85%);  $^1\text{H NMR}$  (400 MHz,  $\text{CDCl}_3$ )  $\delta$  7.62 (s, 2H), 6.62–6.57 (m, 2H), 5.51 (d,  $J = 2.1$  Hz, 2H), 5.25 (d,  $J = 2.0$  Hz, 2H), 3.97 (q,  $J = 7.2$  Hz, 2H), 3.59 (d,  $J = 14.8$  Hz, 2H), 3.42 (d,  $J = 14.8$  Hz, 2H), 2.48–2.18 (m, 8H), 1.81–1.63 (m, 8H), 1.19 (t,  $J = 7.2$  Hz, 3H);  $^{13}\text{C NMR}$  (100 MHz,  $\text{CDCl}_3$ )  $\delta$  166.7, 149.9, 137.7, 126.6, 126.3, 116.6, 116.5, 109.1, 63.7, 48.9, 38.9, 26.3, 25.3, 22.4, 22.1, 13.7; **HRMS** (ESI)  $m/z$  calculated for  $\text{C}_{27}\text{H}_{33}\text{N}_7\text{O}_2\text{Na}$   $[\text{M}+\text{Na}]^+$ : 510.2594, found: 510.2590.

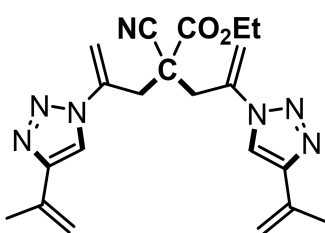

**(3w) 0.25 mmol scale:** Prepared following the general procedure showed above using 4-ethynyltoluene (63.4  $\mu\text{L}$ , 0.5 mmol, 2.0 eq.), VA (224.8 mg, 0.55 mmol, 2.2 eq.), ethyl cyanoacetate (26.6  $\mu\text{L}$ , 0.25 mmol, 1.0 eq.), triethylamine ( $\text{Et}_3\text{N}$ ) (139.0  $\mu\text{L}$ , 1.0 mmol, 4.0 eq.), CuI (190.4 mg, 0.1 mmol, 0.4 eq.) and  $\text{Pd}(\text{PPh}_3)_4$  (11.5 mg, 0.01 mmol, 0.04 eq.). The desired product was purified by a silica gel column chromatography (petroleum ether/ethyl acetate=2:1) as yellow oily liquid (187.21 mg, 89%);  $^1\text{H NMR}$  (400 MHz,  $\text{CDCl}_3$ )  $\delta$  7.73 (s, 2H), 5.79 (s, 2H), 5.54 (d,  $J = 2.2$  Hz,

2H), 5.29 (d,  $J = 2.1$  Hz, 2H), 5.23–5.08 (m, 2H), 3.97 (q,  $J = 7.2$  Hz, 2H), 3.62 (d,  $J = 14.8$  Hz, 2H), 3.44 (d,  $J = 14.8$  Hz, 2H), 2.13 (s, 6H), 1.18 (t,  $J = 7.2$  Hz, 3H);  $^{13}\text{C}$  NMR (100 MHz,  $\text{CDCl}_3$ )  $\delta$  166.6, 149.2, 137.7, 132.8, 117.9, 116.5, 113.7, 109.6, 63.7, 48.8, 39.0, 20.6, 13.7; HRMS (ESI)  $m/z$  calculated for  $\text{C}_{21}\text{H}_{25}\text{N}_7\text{O}_2\text{Na}$   $[\text{M}+\text{Na}]^+$ : 430.1968, found: 430.1992.

---

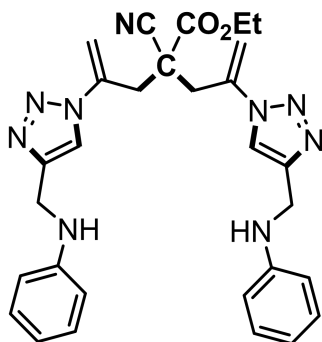

**(3x) 0.25 mmol scale:** Prepared following the general procedure showed above using N-(prop-2-yn-1-yl)aniline (65.6 mg, 0.5 mmol, 2.0 eq.), **VA** (224.8 mg, 0.55 mmol, 2.2 eq.), ethyl cyanoacetate (26.6  $\mu\text{L}$ , 0.25 mmol, 1.0 eq.), triethylamine ( $\text{Et}_3\text{N}$ ) (139.0  $\mu\text{L}$ , 1.0 mmol, 4.0 eq.), CuI (190.4 mg, 0.1 mmol, 0.4 eq.) and  $\text{Pd}(\text{PPh}_3)_4$  (11.5 mg, 0.01 mmol, 0.04 eq.). The desired product was purified by a silica gel column chromatography (petroleum ether/ethyl acetate=2:1) as yellow oily liquid (228.50 mg, 85%);  $^1\text{H}$  NMR (400 MHz,  $\text{CDCl}_3$ )  $\delta$  7.69 (s, 2H), 7.22–7.12 (m, 4H), 6.77–6.71 (m, 2H), 6.70–6.62 (m, 4H), 5.48 (d,  $J = 2.2$  Hz, 2H), 5.24 (d,  $J = 2.1$  Hz, 2H), 4.47 (s, 4H), 3.94 (q,  $J = 7.1$  Hz, 2H), 3.55 (d,  $J = 14.8$  Hz, 2H), 3.39 (d,  $J = 14.8$  Hz, 2H), 1.15 (t,  $J = 7.1$  Hz, 3H);  $^{13}\text{C}$  NMR (100 MHz,  $\text{CDCl}_3$ )  $\delta$  166.6, 147.4, 147.1, 137.6, 129.3, 120.2, 118.2, 116.3, 113.2, 110.0, 63.6, 48.6, 39.8, 39.0, 13.8; HRMS (ESI)  $m/z$  calculated for  $\text{C}_{29}\text{H}_{31}\text{N}_9\text{O}_2\text{Na}$   $[\text{M}+\text{Na}]^+$ : 560.2499, found: 560.2548.

---

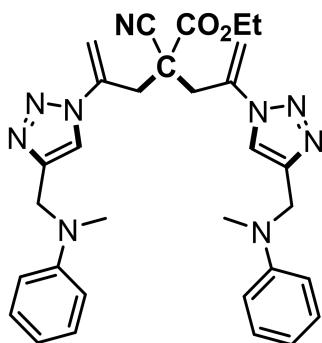

**(3y) 0.25 mmol scale:** Prepared following the general procedure showed above using N-methyl-N-(prop-2-yn-1-yl)aniline (72.5 mg, 0.5 mmol, 2.0 eq.), **VA** (224.8 mg, 0.55 mmol, 2.2 eq.), ethyl cyanoacetate (26.6  $\mu$ L, 0.25 mmol, 1.0 eq.), triethylamine (Et<sub>3</sub>N) (139.0  $\mu$ L, 1.0 mmol, 4.0 eq.), CuI (190.4 mg, 0.1 mmol, 0.4 eq.) and Pd(PPh<sub>3</sub>)<sub>4</sub> (11.5 mg, 0.01 mmol, 0.04 eq.). The desired product was purified by a silica gel column chromatography (petroleum ether/ethyl acetate=2:1) as yellow oily liquid (226.27 mg, 80%); **<sup>1</sup>H NMR** (400 MHz, CDCl<sub>3</sub>)  $\delta$  7.53 (s, 2H), 7.26–7.20 (m, 4H), 6.79 (d,  $J$  = 8.6 Hz, 4H), 6.74 (t,  $J$  = 7.3 Hz, 2H), 5.42 (d,  $J$  = 2.2 Hz, 2H), 5.21 (d,  $J$  = 2.1 Hz, 2H), 4.64 (s, 4H), 3.87 (q,  $J$  = 7.2 Hz, 2H), 3.54 (d,  $J$  = 14.8 Hz, 2H), 3.36 (d,  $J$  = 14.9 Hz, 2H), 3.01 (s, 6H), 1.11 (t,  $J$  = 7.2 Hz, 3H); **<sup>13</sup>C NMR** (100 MHz, CDCl<sub>3</sub>)  $\delta$  166.5, 149.0, 146.2, 137.6, 129.3, 120.0, 117.4, 116.4, 113.0, 109.8, 63.6, 48.6, 39.0, 38.6, 13.8; **HRMS** (ESI)  $m/z$  calculated for C<sub>31</sub>H<sub>35</sub>N<sub>9</sub>O<sub>2</sub>Na [M+Na]<sup>+</sup>: 588.2812, found: 588.2860.

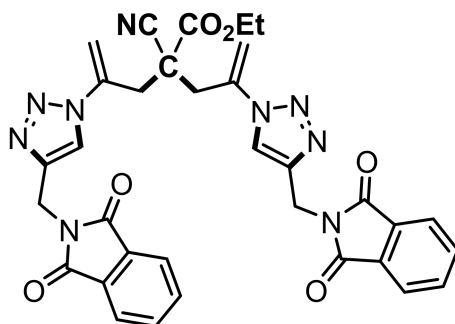

**(3z) 0.5 mmol scale:** Prepared following the general procedure showed above using 2-(prop-2-yn-1-yl)isoindoline-1,3-dione (92.6 mg, 0.5 mmol, 2.0 eq.), **VA** (224.8 mg, 0.55 mmol, 2.2 eq.), ethyl cyanoacetate (26.6  $\mu$ L, 0.25 mmol, 1.0 eq.), triethylamine (Et<sub>3</sub>N) (139.0  $\mu$ L, 1.0 mmol, 4.0 eq.), CuI (190.4 mg, 0.1 mmol, 0.4 eq.) and

Pd(PPh<sub>3</sub>)<sub>4</sub> (11.5 mg, 0.01 mmol, 0.04 eq.). The desired product was purified by a silica gel column chromatography (petroleum ether/ethyl acetate=2:1) as yellow oily liquid (255.03 mg, 79%); <sup>1</sup>H NMR (400 MHz, CDCl<sub>3</sub>) δ 7.87 (s, 2H), 7.86–7.82(m, 4H), 7.75–7.70 (m, 4H), 5.53 (d, *J* = 2.3 Hz, 2H), 5.27 (d, *J* = 2.1 Hz, 2H), 5.00 (s, 4H), 3.91 (q, *J* = 7.1 Hz, 2H), 3.54 (s, 2H), 3.36 (d, *J* = 15.0 Hz, 2H), 1.12 (t, *J* = 7.1 Hz, 3H); <sup>13</sup>C NMR (100 MHz, CDCl<sub>3</sub>) δ 167.6, 166.4, 143.3, 137.4, 134.2, 132.0, 123.5, 121.4, 116.5, 110.2, 63.7, 48.5, 38.9, 32.9, 13.7; HRMS (ESI) *m/z* calculated for C<sub>33</sub>H<sub>27</sub>N<sub>9</sub>O<sub>6</sub>Na [M+Na]<sup>+</sup>: 668.1982, found: 668.2075.

---

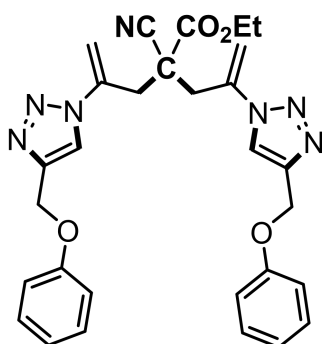

**(3za) 0.25 mmol scale:** Prepared following the general procedure showed above using (prop-2-yn-1-yloxy)benzene (66.1 mg, 0.5 mmol, 2.0 eq.), VA (224.8 mg, 0.55 mmol, 2.2 eq.), ethyl cyanoacetate (26.6 μL, 0.25 mmol, 1.0 eq.), triethylamine (Et<sub>3</sub>N) (139.0 μL, 1.0 mmol, 4.0 eq.), CuI (190.4 mg, 0.1 mmol, 0.4 eq.) and Pd(PPh<sub>3</sub>)<sub>4</sub> (11.5 mg, 0.01 mmol, 0.04 eq.). The desired product was purified by a silica gel column chromatography (petroleum ether/ethyl acetate=2:1) as yellow oily liquid (221.23 mg, 82%); <sup>1</sup>H NMR (400 MHz, CDCl<sub>3</sub>) δ 7.81 (s, 2H), 7.24–7.18 (m, 4H), 6.94–6.88 (m, 6H), 5.49 (d, *J* = 2.3 Hz, 2H), 5.24 (d, *J* = 2.2 Hz, 2H), 5.15 (s, 4H), 3.86 (q, *J* = 7.2 Hz, 2H), 3.55 (d, *J* = 14.9 Hz, 2H), 3.35 (d, *J* = 14.9 Hz, 2H), 1.09 (t, *J* = 7.2 Hz, 3H); <sup>13</sup>C NMR (100 MHz, CDCl<sub>3</sub>) δ 164.7, 157.0, 144.0, 136.6, 128.6, 120.4, 120.2, 115.4, 113.7, 109.3, 62.7, 60.7, 47.6, 38.1, 12.7; HRMS (ESI) *m/z* calculated for C<sub>29</sub>H<sub>29</sub>N<sub>7</sub>O<sub>4</sub>Na [M+Na]<sup>+</sup>: 562.2179, found: 562.2180.

---



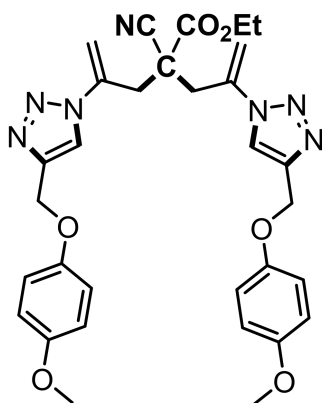

**(3zb) 0.25 mmol scale:** Prepared following the general procedure showed above using 1-methoxy-4-(prop-2-yn-1-yloxy)benzene (81.2 mg, 0.5 mmol, 2.0 eq.), VA (224.8 mg, 0.55 mmol, 2.2 eq.), ethyl cyanoacetate (26.6  $\mu$ L, 0.25 mmol, 1.0 eq.), triethylamine (Et<sub>3</sub>N) (139.0  $\mu$ L, 1.0 mmol, 4.0 eq.), CuI (190.4 mg, 0.1 mmol, 0.4 eq.) and Pd(PPh<sub>3</sub>)<sub>4</sub> (11.5 mg, 0.01 mmol, 0.04 eq.). The desired product was purified by a silica gel column chromatography (petroleum ether/ethyl acetate=2:1) as yellow oily liquid (257.85 mg, 86%); <sup>1</sup>H NMR (400 MHz, CDCl<sub>3</sub>)  $\delta$  7.86 (s, 2H), 6.95–6.89 (m, 4H), 6.87–6.80 (m, 4H), 5.55 (d, *J* = 2.3 Hz, 2H), 5.31 (d, *J* = 2.2 Hz, 2H), 5.17 (s, 4H), 3.94 (t, *J* = 7.2 Hz, 2H), 3.76 (s, 6H), 3.62 (d, *J* = 14.9 Hz, 2H), 3.42 (d, *J* = 14.9 Hz, 2H), 1.17 (t, *J* = 7.2 Hz, 3H); <sup>13</sup>C NMR (100 MHz, CDCl<sub>3</sub>)  $\delta$  166.5, 154.3, 152.2, 145.2, 137.6, 121.2, 116.4, 115.8, 114.7, 110.3, 63.7, 62.5, 55.7, 48.7, 39.1, 13.8; HRMS (ESI) *m/z* calculated for C<sub>31</sub>H<sub>33</sub>N<sub>7</sub>O<sub>6</sub>Na [M+Na]<sup>+</sup>: 622.2390, found: 622.2351.

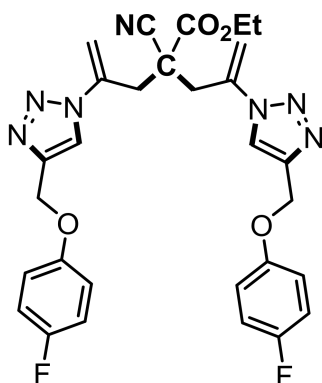

**(3zc) 0.25 mmol scale:** Prepared following the general procedure showed above

using 1-fluoro-4-(prop-2-yn-1-yloxy)benzene (75.1 mg, 0.5 mmol, 2.0 eq.), VA (224.8 mg, 0.55 mmol, 2.2 eq.), ethyl cyanoacetate (26.6  $\mu$ L, 0.25 mmol, 1.0 eq.), triethylamine ( $\text{Et}_3\text{N}$ ) (139.0  $\mu$ L, 1.0 mmol, 4.0 eq.), CuI (190.4 mg, 0.1 mmol, 0.4 eq.) and  $\text{Pd}(\text{PPh}_3)_4$  (11.5 mg, 0.01 mmol, 0.04 eq.). The desired product was purified by a silica gel column chromatography (petroleum ether/ethyl acetate=2:1) as yellow oily liquid (233.11 mg, 81%);  $^1\text{H NMR}$  (400 MHz,  $\text{CDCl}_3$ )  $\delta$  7.87 (s, 2H), 7.01–6.88 (m, 8H), 5.56 (d,  $J = 2.3$  Hz, 2H), 5.32 (d,  $J = 2.2$  Hz, 2H), 5.18 (s, 4H), 3.94 (q,  $J = 7.2$  Hz, 2H), 3.62 (d,  $J = 14.9$  Hz, 2H), 3.43 (d,  $J = 14.9$  Hz, 2H), 1.17 (t,  $J = 7.2$  Hz, 3H);  $^{13}\text{C NMR}$  (100 MHz,  $\text{CDCl}_3$ )  $\delta$  166.5, 158.8 (d,  $J = 239.0$  Hz), 154.2 (d,  $J = 2.1$  Hz), 144.8, 137.6, 121.3, 116.3, 116.1 (d,  $J = 12.6$  Hz), 115.9 (d,  $J = 2.1$  Hz), 110.4, 63.7, 62.4, 48.7, 39.1, 13.8;  $^{19}\text{F NMR}$  (376 MHz,  $\text{CDCl}_3$ )  $\delta$  -123.05; **HRMS** (ESI)  $m/z$  calculated for  $\text{C}_{29}\text{H}_{27}\text{F}_2\text{N}_7\text{O}_4\text{Na}$   $[\text{M}+\text{Na}]^+$ : 598.1991, found: 598.1960.

---

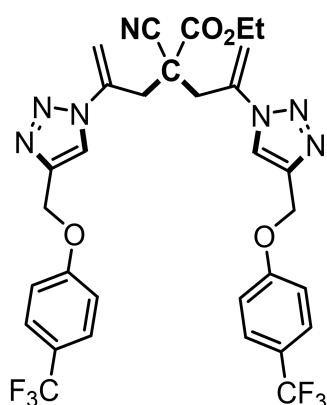

**(3zd) 0.25 mmol scale:** Prepared following the general procedure showed above using 1-(prop-2-yn-1-yloxy)-4-(trifluoromethyl)benzene (100.1 mg, 0.5 mmol, 2.0 eq.), VA (224.8 mg, 0.55 mmol, 2.2 eq.), ethyl cyanoacetate (26.6  $\mu$ L, 0.25 mmol, 1.0 eq.), triethylamine ( $\text{Et}_3\text{N}$ ) (139.0  $\mu$ L, 1.0 mmol, 4.0 eq.), CuI (190.4 mg, 0.1 mmol, 0.4 eq.) and  $\text{Pd}(\text{PPh}_3)_4$  (11.5 mg, 0.01 mmol, 0.04 eq.). The desired product was purified by a silica gel column chromatography (petroleum ether/ethyl acetate=5:1) as yellow oily liquid (280.37 mg, 83%);  $^1\text{H NMR}$  (400 MHz,  $\text{CDCl}_3$ )  $\delta$  7.90 (s, 2H), 7.55 (d,  $J = 8.7$  Hz, 4H), 7.06 (d,  $J = 8.6$  Hz, 4H), 5.57 (d,  $J = 2.3$  Hz, 2H), 5.33 (d,  $J = 2.2$  Hz, 2H), 5.27 (s, 4H), 3.94 (q,  $J = 7.2$  Hz, 2H), 3.62 (d,  $J = 14.8$  Hz, 2H), 3.44

(d,  $J = 14.8$  Hz, 2H), 1.18 (s, 3H);  $^{13}\text{C}$  NMR (100 MHz,  $\text{CDCl}_3$ )  $\delta$  166.5, 160.4, 144.2, 137.6, 127.0 (q,  $J = 3.6$  Hz), 125.6, 123.7, 123.4, 123.0, 121.5, 116.3, 114.8, 110.6, 63.7, 61.9, 48.6, 39.1, 13.7;  $^{19}\text{F}$  NMR (376 MHz,  $\text{CDCl}_3$ )  $\delta$  -61.57; HRMS (ESI)  $m/z$  calculated for  $\text{C}_{31}\text{H}_{27}\text{F}_6\text{N}_7\text{O}_4\text{Na}$   $[\text{M}+\text{Na}]^+$ : 698.1927, found: 698.1937.

---

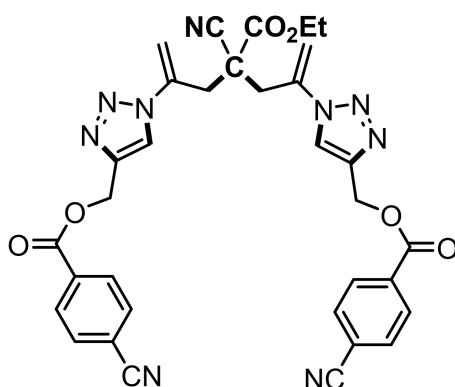

**(3ze) 0.25 mmol scale:** Prepared following the general procedure showed above using prop-2-yn-1-yl 4-cyanobenzoate (92.6 mg, 0.5 mmol, 2.0 eq.), VA (224.8 mg, 0.55 mmol, 2.2 eq.), ethyl cyanoacetate (26.6  $\mu\text{L}$ , 0.25 mmol, 1.0 eq.), triethylamine ( $\text{Et}_3\text{N}$ ) (139.0  $\mu\text{L}$ , 1.0 mmol, 4.0 eq.),  $\text{CuI}$  (190.4 mg, 0.1 mmol, 0.4 eq.) and  $\text{Pd}(\text{PPh}_3)_4$  (11.5 mg, 0.01 mmol, 0.04 eq.). The desired product was purified by a silica gel column chromatography (petroleum ether/ethyl acetate=2:1) as yellow oily liquid (277.63 mg, 86%);  $^1\text{H}$  NMR (400 MHz,  $\text{CDCl}_3$ )  $\delta$  8.18–8.10 (m, 4H), 7.97 (s, 2H), 7.78–7.69 (m, 4H), 5.58 (d,  $J = 2.3$  Hz, 2H), 5.55–5.48 (m, 4H), 5.33 (d,  $J = 2.2$  Hz, 2H), 4.00 (q,  $J = 7.2$  Hz, 2H), 3.60 (d,  $J = 14.9$  Hz, 2H), 3.44 (d,  $J = 14.9$  Hz, 2H), 1.17 (t,  $J = 7.2$  Hz, 3H);  $^{13}\text{C}$  NMR (100 MHz,  $\text{CDCl}_3$ )  $\delta$  166.5, 164.8, 142.9, 137.5, 133.4, 132.3, 130.3, 122.7, 117.8, 116.7, 116.2, 110.7, 63.7, 58.4, 48.5, 39.1, 13.8; HRMS (ESI)  $m/z$  calculated for  $\text{C}_{33}\text{H}_{27}\text{N}_9\text{O}_6\text{Na}$   $[\text{M}+\text{Na}]^+$ : 668.1982, found: 668.1983.

---

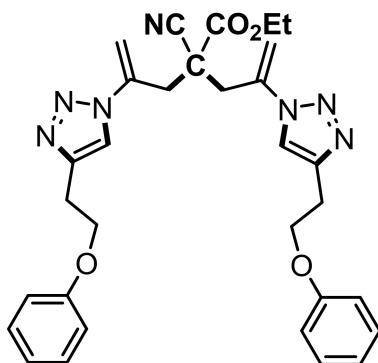

**(3zf) 0.5 mmol scale:** Prepared following the general procedure showed above using (but-3-yn-1-yloxy)benzene (73.1 mg, 0.5 mmol, 2.0 eq.), VA (224.8 mg, 0.55 mmol, 2.2 eq.), ethyl cyanoacetate (26.6  $\mu\text{L}$ , 0.25 mmol, 1.0 eq.), triethylamine ( $\text{Et}_3\text{N}$ ) (139.0  $\mu\text{L}$ , 1.0 mmol, 4.0 eq.), CuI (190.4 mg, 0.1 mmol, 0.4 eq.) and  $\text{Pd}(\text{PPh}_3)_4$  (11.5 mg, 0.01 mmol, 0.04 eq.). The desired product was purified by a silica gel column chromatography (petroleum ether/ethyl acetate=2:1) as yellow oily liquid (227.06 mg, 80%);  $^1\text{H NMR}$  (400 MHz,  $\text{CDCl}_3$ )  $\delta$  7.71 (s, 2H), 7.31–7.25 (m, 4H), 7.03–6.86 (m, 6H), 5.50 (d,  $J = 2.2$  Hz, 2H), 5.26 (d,  $J = 2.0$  Hz, 2H), 4.25 (t,  $J = 6.3$  Hz, 4H), 3.92 (q,  $J = 7.2$  Hz, 2H), 3.60 (d,  $J = 14.9$  Hz, 2H), 3.40 (d,  $J = 14.9$  Hz, 2H), 3.23 (t,  $J = 6.3$  Hz, 4H), 1.12 (t,  $J = 7.2$  Hz, 3H);  $^{13}\text{C NMR}$  (100 MHz,  $\text{CDCl}_3$ )  $\delta$  166.6, 158.5, 145.4, 137.7, 129.5, 121.0, 120.5, 116.5, 114.6, 109.6, 66.4, 63.6, 48.8, 39.0, 26.1, 13.7; **HRMS** (ESI)  $m/z$  calculated for  $\text{C}_{31}\text{H}_{33}\text{N}_7\text{O}_4\text{Na}$   $[\text{M}+\text{Na}]^+$ : 590.2492, found: 590.2576.

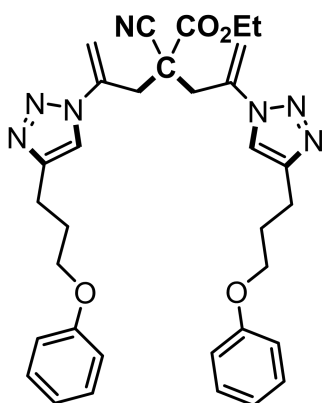

**(3zg) 0.25 mmol scale:** Prepared following the general procedure showed above

using (pent-4-yn-1-yloxy)benzene (80.1 mg, 0.5 mmol, 2.0 eq.), VA (224.8 mg, 0.55 mmol, 2.2 eq.), ethyl cyanoacetate (26.6  $\mu$ L, 0.25 mmol, 1.0 eq.), triethylamine (Et<sub>3</sub>N) (139.0  $\mu$ L, 1.0 mmol, 4.0 eq.), CuI (190.4 mg, 0.1 mmol, 0.4 eq.) and Pd(PPh<sub>3</sub>)<sub>4</sub> (11.5 mg, 0.01 mmol, 0.04 eq.). The desired product was purified by a silica gel column chromatography (petroleum ether/ethyl acetate=2:1) as yellow oily liquid (259.13 mg, 87%); <sup>1</sup>H NMR (400 MHz, CDCl<sub>3</sub>)  $\delta$  7.56 (s, 2H), 7.29–7.23 (m, 4H), 6.95–6.86 (m, 6H), 5.45 (d, *J* = 2.1 Hz, 2H), 5.22 (d, *J* = 2.0 Hz, 2H), 4.03–3.93 (m, 6H), 3.57 (d, *J* = 14.8 Hz, 2H), 3.40 (d, *J* = 14.8 Hz, 2H), 2.93 (t, *J* = 7.5 Hz, 4H), 2.96–2.13 (m, 4H), 1.17 (t, *J* = 7.2 Hz, 3H); <sup>13</sup>C NMR (100 MHz, CDCl<sub>3</sub>)  $\delta$  166.6, 158.9, 147.9, 137.7, 129.5, 120.7, 119.7, 116.4, 114.5, 109.4, 66.5, 63.5, 48.7, 39.0, 28.8, 22.1, 13.8; HRMS (ESI) *m/z* calculated for C<sub>33</sub>H<sub>37</sub>N<sub>7</sub>O<sub>4</sub>Na [M+Na]<sup>+</sup>: 618.2805, found: 618.2800.

---

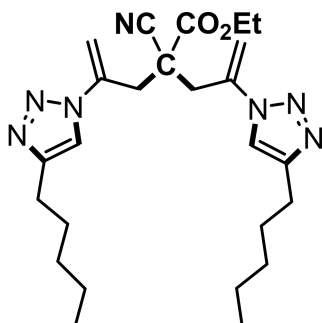

**(3zh) 0.25 mmol scale:** Prepared following the general procedure showed above using 1-heptyne (65.6  $\mu$ L, 0.5 mmol, 2.0 eq.), VA (224.8 mg, 0.55 mmol, 2.2 eq.), ethyl cyanoacetate (26.6  $\mu$ L, 0.25 mmol, 1.0 eq.), triethylamine (Et<sub>3</sub>N) (139.0  $\mu$ L, 1.0 mmol, 4.0 eq.), CuI (190.4 mg, 0.1 mmol, 0.4 eq.) and Pd(PPh<sub>3</sub>)<sub>4</sub> (11.5 mg, 0.01 mmol, 0.04 eq.). The desired product was purified by a silica gel column chromatography (petroleum ether/ethyl acetate=2:1) as yellow oily liquid (191.72 mg, 82%); <sup>1</sup>H NMR (400 MHz, CDCl<sub>3</sub>)  $\delta$  7.54 (s, 2H), 5.49 (d, *J* = 2.1 Hz, 2H), 5.25 (d, *J* = 1.9 Hz, 2H), 3.97 (q, *J* = 7.2 Hz, 2H), 3.61 (d, *J* = 14.8 Hz, 2H), 3.41 (d, *J* = 14.8 Hz, 2H), 2.78–2.66 (m, 4H), 1.76–1.59 (m, 4H), 1.35 (t, *J* = 5.4 Hz, 8H), 1.20 (t, *J* = 7.2 Hz, 3H), 0.93–0.86 (m, 6H); <sup>13</sup>C NMR (100 MHz, CDCl<sub>3</sub>)  $\delta$  166.6, 149.1, 137.8,

119.1, 116.6, 109.1, 63.5, 53.5, 48.8, 39.0, 31.4, 29.0, 25.5, 22.4, 14.0; **HRMS** (ESI)  $m/z$  calculated for  $C_{25}H_{37}N_7O_2Na$   $[M+Na]^+$ : 490.2907, found: 490.2998.

---

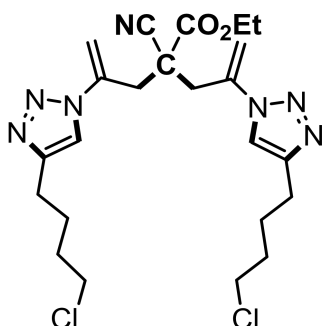

**(3zi) 0.25 mmol scale:** Prepared following the general procedure showed above using 6-chlorohex-1-yne (58.1 mg, 0.5 mmol, 2.0 eq.), **VA** (224.8 mg, 0.55 mmol, 2.2 eq.), ethyl cyanoacetate (26.6  $\mu$ L, 0.25 mmol, 1.0 eq.), triethylamine ( $Et_3N$ ) (139.0  $\mu$ L, 1.0 mmol, 4.0 eq.),  $CuI$  (190.4 mg, 0.1 mmol, 0.4 eq.) and  $Pd(PPh_3)_4$  (11.5 mg, 0.01 mmol, 0.04 eq.). The desired product was purified by a silica gel column chromatography (petroleum ether/ethyl acetate=2:1) as yellow oily liquid (205.51 mg, 81%);  $^1H$  NMR (400 MHz,  $CDCl_3$ )  $\delta$  7.57 (s, 2H), 5.49 (d,  $J = 2.1$  Hz, 2H), 5.25 (d,  $J = 2.0$  Hz, 2H), 4.01 (q,  $J = 7.2$  Hz, 2H), 3.62–3.54 (m, 6H), 3.42 (d,  $J = 14.8$  Hz, 2H), 2.77 (t,  $J = 6.9$  Hz, 4H), 1.86 (d,  $J = 6.7$  Hz, 8H), 1.22 (t,  $J = 7.2$  Hz, 3H);  $^{13}C$  NMR (100 MHz,  $CDCl_3$ )  $\delta$  166.6, 148.2, 137.8, 119.4, 109.3, 63.6, 53.4, 48.7, 44.7, 39.0, 31.8, 26.5, 24.8, 13.8; **HRMS** (ESI)  $m/z$  calculated for  $C_{23}H_{31}Cl_2N_7O_2Na$   $[M+Na]^+$ : 530.1814, found: 530.1868.

---

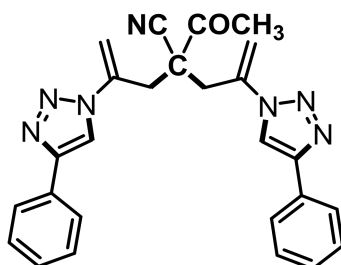

**(4a) 0.25 mmol scale:** Prepared following the general procedure showed above using phenylacetylene (60.4  $\mu$ L, 0.55 mmol, 2.2 eq.), **VA** (224.8 mg, 0.55 mmol, 2.2

eq.), 3-Oxobutanenitrile (21.3  $\mu\text{L}$ , 0.25 mmol, 1.0 eq.), triethylamine ( $\text{Et}_3\text{N}$ ) (139.0  $\mu\text{L}$ , 1.0 mmol, 4.0 eq.),  $\text{CuI}$  (190.4 mg, 0.1 mmol, 0.4 eq.) and  $\text{Pd}(\text{PPh}_3)_4$  (11.5 mg, 0.01 mmol, 0.04 eq.). The desired product was purified by a silica gel column chromatography (petroleumether/ethyl acetate=2:1) as yellow oily liquid (144.12 mg, 85%);  $^1\text{H NMR}$  (400 MHz,  $\text{CDCl}_3$ )  $\delta$  8.04 (s, 2H), 7.94–7.79 (m, 4H), 7.43 (t,  $J = 7.4$  Hz, 4H), 7.39–7.31 (m, 2H), 5.60 (d,  $J = 2.2$  Hz, 2H), 5.26 (d,  $J = 2.1$  Hz, 2H), 3.55 (d,  $J = 14.8$  Hz, 2H), 3.45 (d,  $J = 14.9$  Hz, 2H), 2.35 (s, 3H);  $^{13}\text{C NMR}$  (100 MHz,  $\text{CDCl}_3$ )  $\delta$  166.5, 148.3, 137.4, 129.9, 128.9, 128.6, 126.0, 117.8, 110.7, 106.8, 52.2, 40.3, 29.3; **HRMS** (ESI)  $m/z$  calculated for  $\text{C}_{26}\text{H}_{23}\text{N}_7\text{ONa}$   $[\text{M}+\text{Na}]^+$ : 472.1862, found: 472.1929.

---

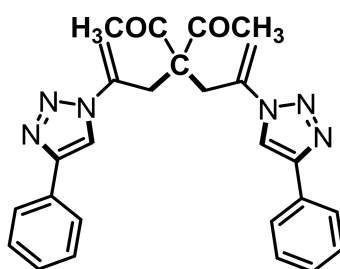

**(4b) 0.25 mmol scale:** Prepared following the general procedure showed above using phenylacetylene (60.4  $\mu\text{L}$ , 0.55 mmol, 2.2 eq.), **VA** (224.8 mg, 0.55 mmol, 2.2 eq.), acetylacetone (25.7  $\mu\text{L}$ , 0.25 mmol, 1.0 eq.), triethylamine ( $\text{Et}_3\text{N}$ ) (139.0  $\mu\text{L}$ , 1.0 mmol, 4.0 eq.),  $\text{CuI}$  (190.4 mg, 0.1 mmol, 0.4 eq.) and  $\text{Pd}(\text{PPh}_3)_4$  (11.5 mg, 0.01 mmol, 0.04 eq.). The desired product was purified by a silica gel column chromatography (petroleumether/ethyl acetate=2:1) as yellow oily liquid (198.28 mg, 85%);  $^1\text{H NMR}$  (400 MHz,  $\text{CDCl}_3$ )  $\delta$  7.89 (s, 2H), 7.83–7.78 (m, 4H), 7.41 (t,  $J = 7.4$  Hz, 4H), 7.37–7.29 (m, 2H), 5.47 (d,  $J = 2.1$  Hz, 2H), 5.07 (d,  $J = 1.8$  Hz, 2H), 3.60 (s, 4H), 2.15 (s, 6H);  $^{13}\text{C NMR}$  (100 MHz,  $\text{CDCl}_3$ )  $\delta$  204.4, 148.1, 139.3, 129.8, 128.9, 128.6, 125.9, 118.1, 109.4, 68.5, 33.7, 27.2; **HRMS** (ESI)  $m/z$  calculated for  $\text{C}_{27}\text{H}_{26}\text{N}_6\text{O}_2\text{Na}$   $[\text{M}+\text{Na}]^+$ : 489.2015, found: 489.2067.

---

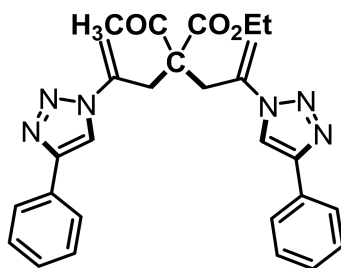

**(4c) 0.25 mmol scale:** Prepared following the general procedure showed above using phenylacetylene (60.4  $\mu$ L, 0.55 mmol, 2.2 eq.), **VA** (224.8 mg, 0.55 mmol, 2.2 eq.), ethyl 3-methoxypropanoate (33.7  $\mu$ L, 0.25 mmol, 1.0 eq.), triethylamine ( $\text{Et}_3\text{N}$ ) (139.0  $\mu$ L, 1.0 mmol, 4.0 eq.),  $\text{CuI}$  (190.4 mg, 0.1 mmol, 0.4 eq.) and  $\text{Pd}(\text{PPh}_3)_4$  (11.5 mg, 0.01 mmol, 0.04 eq.). The desired product was purified by a silica gel column chromatography (petroleumether/ethyl acetate=2:1) as yellow oily liquid (198.63 mg, 80%);  $^1\text{H NMR}$  (400 MHz,  $\text{CDCl}_3$ )  $\delta$  7.92 (s, 2H), 7.87–7.75 (m, 4H), 7.50–7.39 (m, 4H), 7.38–7.30 (m, 2H), 5.50 (d,  $J = 1.8$  Hz, 2H), 5.16 (d,  $J = 1.4$  Hz, 2H), 3.99 (q,  $J = 7.2$  Hz, 2H), 3.60 (d,  $J = 15.8$  Hz, 2H), 3.47 (d,  $J = 15.8$  Hz, 2H), 2.11 (s, 3H), 1.19 (t,  $J = 7.2$  Hz, 3H);  $^{13}\text{C NMR}$  (100 MHz,  $\text{CDCl}_3$ )  $\delta$  202.5, 170.4, 148.0, 139.2, 129.9, 128.9, 128.5, 125.9, 118.2, 110.1, 62.4, 61.7, 34.5, 27.0, 13.8; **HRMS** (ESI)  $m/z$  calculated for  $\text{C}_{28}\text{H}_{28}\text{N}_6\text{O}_3\text{Na}$   $[\text{M}+\text{Na}]^+$ : 519.2121, found: 519.2120.

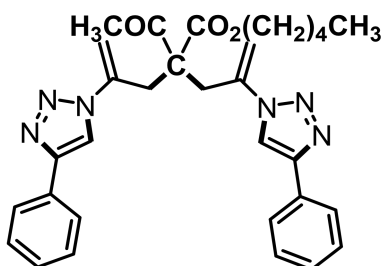

**(4d) 0.25 mmol scale:** Prepared following the general procedure showed above using phenylacetylene (60.4  $\mu$ L, 0.55 mmol, 2.2 eq.), **VA** (224.8 mg, 0.55 mmol, 2.2 eq.), pentyl 3-oxobutanoate (44.8  $\mu$ L, 0.25 mmol, 1.0 eq.), triethylamine ( $\text{Et}_3\text{N}$ ) (139.0  $\mu$ L, 1.0 mmol, 4.0 eq.),  $\text{CuI}$  (190.4 mg, 0.1 mmol, 0.4 eq.) and  $\text{Pd}(\text{PPh}_3)_4$  (11.5 mg, 0.01 mmol, 0.04 eq.). The desired product was purified by a silica gel column chromatography (petroleumether/ethyl acetate=2:1) as yellow oily liquid (223.55 mg, 83%);  $^1\text{H NMR}$  (400 MHz,  $\text{CDCl}_3$ )  $\delta$  7.91 (s, 2H), 7.86–7.77 (m, 4H), 7.42 (t,  $J = 7.4$



Hz, 4H), 7.37–7.30 (m, 2H), 5.50 (d,  $J = 1.7$  Hz, 2H), 5.19–5.10 (m, 2H), 3.91 (t,  $J = 6.9$  Hz, 2H), 3.61 (d,  $J = 15.8$  Hz, 2H), 3.47 (d,  $J = 15.8$  Hz, 2H), 2.12 (s, 3H), 1.59–1.51 (m, 2H), 1.37–1.12 (m, 6H), 0.85 (t,  $J = 7.0$  Hz, 3H);  $^{13}\text{C}$  NMR (100 MHz,  $\text{CDCl}_3$ )  $\delta$  202.4, 170.4, 147.9, 139.2, 129.9, 128.9, 128.5, 125.8, 118.2, 110.0, 66.6, 61.7, 34.4, 27.9, 27.8, 26.9, 22.2, 13.9; HRMS (ESI)  $m/z$  calculated for  $\text{C}_{31}\text{H}_{34}\text{N}_6\text{O}_3\text{Na}$   $[\text{M}+\text{Na}]^+$ : 561.2590, found: 561.2600.

---

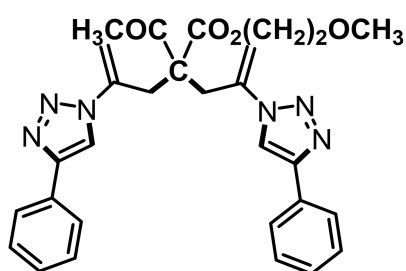

**(4e) 0.25 mmol scale:** Prepared following the general procedure showed above using phenylacetylene (60.4  $\mu\text{L}$ , 0.55 mmol, 2.2 eq.), VA (224.8 mg, 0.55 mmol, 2.2 eq.), 2-methoxyethyl acetoacetate (61.2  $\mu\text{L}$ , 0.25 mmol, 1.0 eq.), triethylamine ( $\text{Et}_3\text{N}$ ) (139.0  $\mu\text{L}$ , 1.0 mmol, 4.0 eq.),  $\text{CuI}$  (190.4 mg, 0.1 mmol, 0.4 eq.) and  $\text{Pd}(\text{PPh}_3)_4$  (11.5 mg, 0.01 mmol, 0.04 eq.). The desired product was purified by a silica gel column chromatography (petroleum ether/ethyl acetate=2:1) as yellow oily liquid (210.63 mg, 80%);  $^1\text{H}$  NMR (400 MHz,  $\text{CDCl}_3$ )  $\delta$  7.92 (s, 2H), 7.86–7.80 (m, 4H), 7.45–7.39 (m, 4H), 7.37–7.30 (m, 2H), 5.50 (d,  $J = 1.7$  Hz, 2H), 5.22–5.12 (m, 2H), 4.11–4.05 (m, 2H), 3.61 (d,  $J = 15.7$  Hz, 2H), 3.53–3.49 (m, 2H), 3.45(d,  $J = 15.8$  Hz, 2H), 3.30 (s, 3H), 2.12 (s, 3H);  $^{13}\text{C}$  NMR (100 MHz,  $\text{CDCl}_3$ )  $\delta$  202.5, 170.4, 147.9, 139.1, 129.9, 128.9, 128.5, 125.8, 118.3, 110.4, 69.8, 64.9, 61.8, 58.8, 34.6, 27.0; HRMS (ESI)  $m/z$  calculated for  $\text{C}_{29}\text{H}_{30}\text{N}_6\text{O}_4\text{Na}$   $[\text{M}+\text{Na}]^+$ : 549.2227, found:549.2200.

---

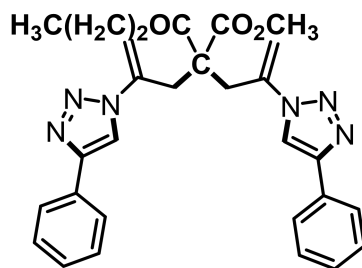

**(4f) 0.25 mmol scale:** Prepared following the general procedure showed above using phenylacetylene (60.4  $\mu$ L, 0.55 mmol, 2.2 eq.), **VA** (224.8 mg, 0.55 mmol, 2.2 eq.), methyl 3-oxohexanoate (35.4  $\mu$ L, 0.25 mmol, 1.0 eq.), triethylamine (Et<sub>3</sub>N) (139.0  $\mu$ L, 1.0 mmol, 4.0 eq.), CuI (190.4 mg, 0.1 mmol, 0.4 eq.) and Pd(PPh<sub>3</sub>)<sub>4</sub> (11.5 mg, 0.01 mmol, 0.04 eq.). The desired product was purified by a silica gel column chromatography (petroleumether/ethyl acetate=2:1) as yellow oily liquid (211.90 mg, 83%); <sup>1</sup>H NMR (400 MHz, CDCl<sub>3</sub>)  $\delta$  7.91 (s, 2H), 7.83–7.78 (m, 4H), 7.42 (t, *J* = 7.4 Hz, 4H), 7.37–7.32 (m, 2H), 5.50 (d, *J* = 1.7 Hz, 2H), 5.15–5.10 (m, 2H), 3.62–3.49 (m, 7H), 2.44 (t, *J* = 7.3 Hz, 2H), 1.43 (q, *J* = 7.4 Hz, 2H), 0.84 (t, *J* = 7.4 Hz, 3H); <sup>13</sup>C NMR (100 MHz, CDCl<sub>3</sub>)  $\delta$  204.8, 171.0, 147.9, 139.3, 129.9, 128.9, 128.5, 125.9, 118.2, 109.9, 61.4, 52.9, 41.1, 34.5, 16.9, 13.5; **HRMS** (ESI) *m/z* calculated for C<sub>29</sub>H<sub>30</sub>N<sub>6</sub>O<sub>3</sub>Na [M+Na]<sup>+</sup>: 533.2277, found: 533.2357.

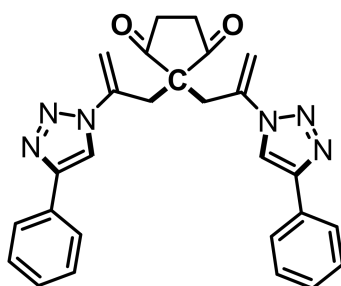

**(4g) 0.25 mmol scale:** Prepared following the general procedure showed above using phenylacetylene (60.4  $\mu$ L, 0.55 mmol, 2.2 eq.), **VA** (224.8 mg, 0.55 mmol, 2.2 eq.), 1,3-cyclopentanedione (22.2  $\mu$ L, 0.25 mmol, 1.0 eq.), triethylamine (Et<sub>3</sub>N) (139.0  $\mu$ L, 1.0 mmol, 4.0 eq.), CuI (190.4 mg, 0.1 mmol, 0.4 eq.) and Pd(PPh<sub>3</sub>)<sub>4</sub> (11.5 mg, 0.01 mmol, 0.04 eq.). The desired product was purified by a silica gel column chromatography (petroleumether/ethyl acetate=2:1) as yellow oily liquid (197.42 mg, 85%); <sup>1</sup>H NMR (400 MHz, CDCl<sub>3</sub>)  $\delta$  7.92 (s, 2H), 7.85–7.79 (m, 4H), 7.42 (t, *J* = 7.4

Hz, 4H), 7.38–7.31 (m, 2H), 5.50 (d,  $J = 1.6$  Hz, 2H), 5.12 (d,  $J = 1.6$  Hz, 2H), 3.23 (s, 4H), 2.70 (s, 4H);  $^{13}\text{C}$  NMR (100 MHz,  $\text{CDCl}_3$ )  $\delta$  213.1, 148.3, 138.2, 129.8, 128.9, 128.6, 125.9, 117.9, 110.0, 57.8, 37.5, 35.5; HRMS (ESI)  $m/z$  calculated for  $\text{C}_{27}\text{H}_{24}\text{N}_6\text{O}_2\text{Na}$   $[\text{M}+\text{Na}]^+$ : 487.1859, found: 487.1882.

---

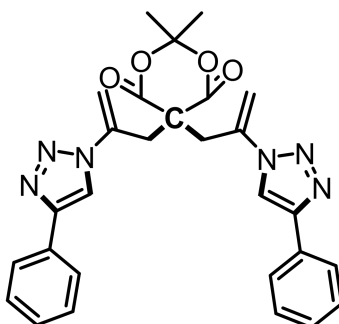

**(4h) 0.25 mmol scale:** Prepared following the general procedure showed above using phenylacetylene (60.4  $\mu\text{L}$ , 0.55 mmol, 2.2 eq.), VA (224.8 mg, 0.55 mmol, 2.2 eq.), 2,2-dimethyl-1,3-dioxane-4,6-dione (31.9  $\mu\text{L}$ , 0.25 mmol, 1.0 eq.), triethylamine ( $\text{Et}_3\text{N}$ ) (139.0  $\mu\text{L}$ , 1.0 mmol, 4.0 eq.),  $\text{CuI}$  (190.4 mg, 0.1 mmol, 0.4 eq.) and  $\text{Pd}(\text{PPh}_3)_4$  (11.5 mg, 0.01 mmol, 0.04 eq.). The desired product was purified by a silica gel column chromatography (petroleumether/ethyl acetate=2:1) as yellow oily liquid (216.99 mg, 85%);  $^1\text{H}$  NMR (400 MHz,  $\text{CDCl}_3$ )  $\delta$  7.98 (s, 2H), 7.86–7.79 (m, 4H), 7.42 (t,  $J = 7.5$  Hz, 4H), 7.34 (t,  $J = 7.4$  Hz, 2H), 5.67 (d,  $J = 1.8$  Hz, 2H), 5.23 (d,  $J = 1.6$  Hz, 2H), 3.66 (s, 4H), 1.74 (s, 6H);  $^{13}\text{C}$  NMR (100 MHz,  $\text{CDCl}_3$ )  $\delta$  199.9, 148.5, 137.7, 129.8, 128.9, 128.7, 126.0, 118.0, 117.9, 110.0, 53.1, 38.0, 28.2; HRMS (ESI)  $m/z$  calculated for  $\text{C}_{28}\text{H}_{26}\text{N}_6\text{O}_4\text{Na}$   $[\text{M}+\text{Na}]^+$ : 533.1914, found: 533.1930.

---

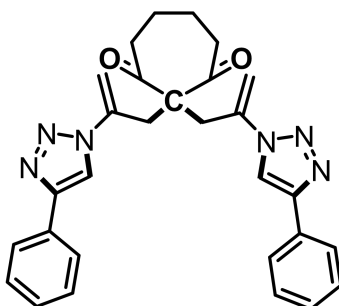

**(4i) 0.25 mmol scale:** Prepared following the general procedure showed above using phenylacetylene (60.4  $\mu\text{L}$ , 0.55 mmol, 2.2 eq.), VA (224.8 mg, 0.55 mmol, 2.2 eq.),

1,3-cycloheptanedione (28.7  $\mu\text{L}$ , 0.25 mmol, 1.0 eq.), triethylamine ( $\text{Et}_3\text{N}$ ) (139.0  $\mu\text{L}$ , 1.0 mmol, 4.0 eq.),  $\text{CuI}$  (190.4 mg, 0.1 mmol, 0.4 eq.) and  $\text{Pd}(\text{PPh}_3)_4$  (11.5 mg, 0.01 mmol, 0.04 eq.). The desired product was purified by a silica gel column chromatography (petroleumether/ethyl acetate=5:1) as white solid (184.72 mg, 75%);  $^1\text{H NMR}$  (400 MHz,  $\text{CDCl}_3$ )  $\delta$  7.89 (s, 2H), 7.88–7.81 (m, 4H), 7.44 (t,  $J = 7.4$  Hz, 4H), 7.39–7.33 (m, 2H), 5.48 (d,  $J = 1.5$  Hz, 2H), 5.27–5.21 (m, 2H), 3.47 (s, 4H), 2.28 (s, 4H), 1.74 (s, 4H);  $^{13}\text{C NMR}$  (100 MHz,  $\text{CDCl}_3$ )  $\delta$  210.2, 148.2, 139.5, 129.8, 128.9, 128.6, 125.9, 118.5, 110.9, 66.6, 42.4, 33.7, 28.6; **HRMS** (ESI)  $m/z$  calculated for  $\text{C}_{29}\text{H}_{28}\text{N}_6\text{O}_2\text{Na}$   $[\text{M}+\text{Na}]^+$ : 515.2172, found: 515.2155.

---

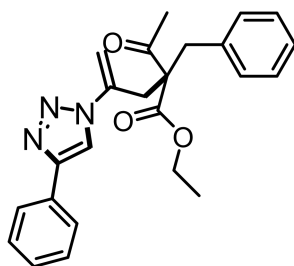

**(4j) 0.25 mmol scale:** Prepared following the general procedure showed above using phenylacetylene (30.2  $\mu\text{L}$ , 0.28 mmol, 1.1 eq.), **VA** (112.4 mg, 0.28 mmol, 1.1 eq.), 1,3-cycloheptanedione (28.7  $\mu\text{L}$ , 0.25 mmol, 1.0 eq.), triethylamine ( $\text{Et}_3\text{N}$ ) (139.0  $\mu\text{L}$ , 1.0 mmol, 4.0 eq.),  $\text{CuI}$  (190.4 mg, 0.1 mmol, 0.4 eq.) and  $\text{Pd}(\text{PPh}_3)_4$  (11.5 mg, 0.01 mmol, 0.04 eq.). The desired product was purified by a silica gel column chromatography (petroleumether/ethyl acetate=8:1) as white solid (85.68 mg, 85%);  $^1\text{H NMR}$  (400 MHz, Chloroform-*d*)  $\delta$  7.87 (d,  $J = 24.5$  Hz, 3H), 7.41 (d,  $J = 33.6$  Hz, 3H), 7.25 (s, 3H), 7.10 (s, 2H), 5.61 (s, 1H), 5.19 (s, 1H), 3.58 (s, 3H), 3.46 (t,  $J = 13.3$  Hz, 2H), 3.27 (d,  $J = 5.2$  Hz, 2H), 2.03 (s, 3H);  $^{13}\text{C NMR}$  (101 MHz,  $\text{CDCl}_3$ )  $\delta$  204.1, 171.5, 147.8, 139.6, 135.5, 130.0, 129.9, 128.9, 128.6, 128.5, 127.3, 125.9, 118.4, 110.4, 63.8, 52.6, 39.0, 35.6, 29.7, 28.1; **HRMS** (ESI)  $m/z$  calculated for  $\text{C}_{24}\text{H}_{25}\text{N}_3\text{O}_3\text{Na}$   $[\text{M}+\text{Na}]^+$ : 426.1794, found: 426.1765.

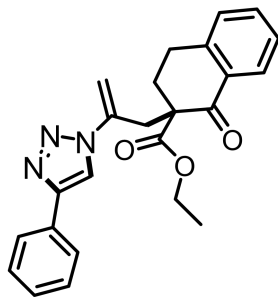

**(4k) 0.25 mmol scale:** Prepared following the general procedure showed above using phenylacetylene (30.2  $\mu\text{L}$ , 0.28 mmol, 1.1 eq.), VA (112.4 mg, 0.28 mmol, 1.1 eq.), 1,3-cycloheptanedione (28.7  $\mu\text{L}$ , 0.25 mmol, 1.0 eq.), triethylamine ( $\text{Et}_3\text{N}$ ) (139.0  $\mu\text{L}$ , 1.0 mmol, 4.0 eq.), CuI (190.4 mg, 0.1 mmol, 0.4 eq.) and  $\text{Pd}(\text{PPh}_3)_4$  (11.5 mg, 0.01 mmol, 0.04 eq.). The desired product was purified by a silica gel column chromatography (petroleum ether/ethyl acetate=8:1) as white solid (73.21 mg, 73%);  $^1\text{H NMR}$  (400 MHz, Chloroform-*d*)  $\delta$  7.99 (d,  $J = 7.2$  Hz, 2H), 7.90- 7.80 (m, 2H), 7.44 (m, 3H), 7.38-7.32 (m, 1H), 7.30-7.26 (m, 1H), 7.16 (d,  $J = 7.7$  Hz, 1H), 5.55 (s, 1H), 5.24 (s, 1H), 4.03 (q,  $J = 7.1$  Hz, 2H), 3.81 (d,  $J = 14.8$  Hz, 1H), 3.48 (d,  $J = 14.8$  Hz, 1H), 3.12-2.98 (m, 1H), 2.83 (m, 1H), 2.53-2.43 (m, 1H), 2.04-1.97 (m, 1H), 1.11 (t,  $J = 7.1$  Hz, 3H);  $^{13}\text{C NMR}$  (101 MHz,  $\text{CDCl}_3$ )  $\delta$  193.9, 171.1, 147.8, 142.9, 139.3, 134.1, 131.9, 130.2, 128.9, 128.7, 128.4, 128.1, 126.8, 125.8, 118.0, 110.1, 61.8, 57.6, 36.4, 31.0, 25.9, 13.4; **HRMS** (ESI)  $m/z$  calculated for  $\text{C}_{24}\text{H}_{23}\text{N}_3\text{O}_3\text{Na}$   $[\text{M}+\text{Na}]^+$ :424.1637, found: 424.1664.

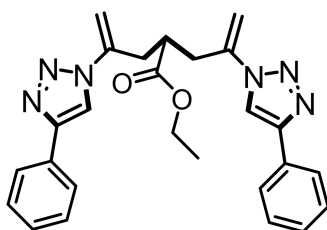

**(6a) 0.25 mmol scale:** Prepared following the general procedure showed above using phenylacetylene (60.4  $\mu\text{L}$ , 0.55 mmol, 2.2 eq.), VA (224.8 mg, 0.55 mmol, 2.2 eq.), ethyl 4,4,4-trifluoro-3-oxobutanoate (36.6  $\mu\text{L}$ , 0.25 mmol, 1.0 eq.), triethylamine ( $\text{Et}_3\text{N}$ ) (139.0  $\mu\text{L}$ , 1.0 mmol, 4.0 eq.), CuI (190.4 mg, 0.1 mmol, 0.4 eq.) and  $\text{Pd}(\text{PPh}_3)_4$  (11.5 mg, 0.01 mmol, 0.04 eq.). The desired product was purified by a

silica gel column chromatography (petroleumether/ethyl acetate=2:1) as yellow oily liquid (99.93 mg, 88%); **<sup>1</sup>H NMR** (400 MHz, Chloroform-*d*) δ 8.02 (s, 2H), 7.85 (d, *J* = 7.5 Hz, 4H), 7.42 (t, *J* = 7.5 Hz, 4H), 7.34 (t, *J* = 7.4 Hz, 2H), 5.48 (s, 2H), 5.11 (s, 2H), 4.09 (q, *J* = 7.1 Hz, 2H), 3.18 (d, *J* = 7.1 Hz, 4H), 3.07 (q, *J* = 7.3, 6.9 Hz, 1H), 1.20 (t, *J* = 7.1 Hz, 3H); **<sup>13</sup>C NMR** (100 MHz, Chloroform-*d*) δ 173.5, 147.9, 140.7, 130.1, 128.9, 128.4, 125.9, 117.5, 106.3, 61.0, 41.8, 35.3, 14.2. **HRMS** (ESI) *m/z* calculated for C<sub>28</sub>H<sub>30</sub>N<sub>5</sub>O<sub>4</sub>Na [M+Na]<sup>+</sup>: 477.2015, found: 477.2065.

---

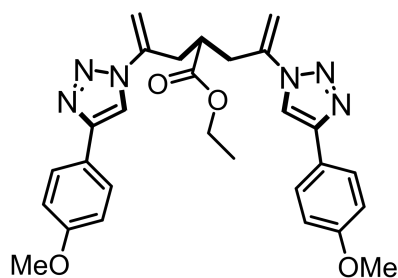

**(6b) 0.25 mmol scale:** Prepared following the general procedure showed above using 4-methoxyphenylacetylene (74.1 μL, 0.55 mmol, 2.2 eq.), VA (224.8 mg, 0.55 mmol, 2.2 eq.), ethyl 4,4,4-trifluoro-3-oxobutanoate (36.6 μL, 0.25 mmol, 1.0 eq.), triethylamine (Et<sub>3</sub>N) (139.0 μL, 1.0 mmol, 4.0 eq.), CuI (190.4 mg, 0.1 mmol, 0.4 eq.) and Pd(PPh<sub>3</sub>)<sub>4</sub> (11.5 mg, 0.01 mmol, 0.04 eq.). The desired product was purified by a silica gel column chromatography (petroleumether/ethyl acetate=2:1) as yellow oily liquid (110.56 mg, 86%); **<sup>1</sup>H NMR** (400 MHz, Chloroform-*d*) δ 7.86 (s, 2H), 7.73 – 7.67 (m, 4H), 6.91 – 6.84 (m, 4H), 5.39 (s, 2H), 5.02 (s, 2H), 4.02 (q, *J* = 7.1 Hz, 2H), 3.78 (s, 6H), 3.10 (d, *J* = 7.0 Hz, 4H), 3.02 – 2.95 (m, 1H), 1.12 (d, *J* = 7.1 Hz, 3H); **<sup>13</sup>C NMR** (100 MHz, Chloroform-*d*) δ 173.3, 146.0, 140.5, 134.4, 132.7, 126.2, 118.9, 118.6, 111.9, 107.2, 61.1, 41.6, 35.2, 14.3. **HRMS** (ESI) *m/z* calculated for C<sub>28</sub>H<sub>30</sub>N<sub>5</sub>O<sub>4</sub>Na [M+Na]<sup>+</sup>: 537.2226, found: 537.2256.

---

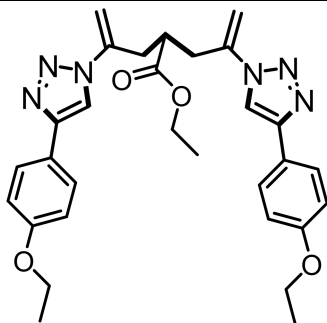

**(6c) 0.25 mmol scale:** Prepared following the general procedure showed above using 4-ethoxyphenylacetylene (81.2  $\mu\text{L}$ , 0.55 mmol, 2.2 eq.), VA (224.8 mg, 0.55 mmol, 2.2 eq.), ethyl 4,4,4-trifluoro-3-oxobutanoate (36.6  $\mu\text{L}$ , 0.25 mmol, 1.0 eq.), triethylamine ( $\text{Et}_3\text{N}$ ) (139.0  $\mu\text{L}$ , 1.0 mmol, 4.0 eq.),  $\text{CuI}$  (190.4 mg, 0.1 mmol, 0.4 eq.) and  $\text{Pd}(\text{PPh}_3)_4$  (11.5 mg, 0.01 mmol, 0.04 eq.). The desired product was purified by a silica gel column chromatography (petroleumether/ethyl acetate=2:1) as yellow oily liquid (111.16 mg, 82%);  $^1\text{H NMR}$  (400 MHz, Chloroform-*d*)  $\delta$  7.91 (s, 2H), 7.75 (d,  $J = 7.8$  Hz, 4H), 6.93 (d,  $J = 8.1$  Hz, 4H), 5.46 (s, 2H), 5.08 (s, 2H), 4.07 (q,  $J = 7.0$  Hz, 6H), 3.16 (d,  $J = 6.8$  Hz, 4H), 3.06 (q,  $J = 6.9$  Hz, 1H), 1.44 (t,  $J = 6.9$  Hz, 6H), 1.19 (t,  $J = 7.1$  Hz, 3H);  $^{13}\text{C NMR}$  (100 MHz, Chloroform-*d*)  $\delta$  173.6, 159.2, 147.8, 140.6, 127.2, 122.6, 116.6, 114.8, 106.0, 63.5, 61.0, 41.7, 35.2, 14.8, 14.2. **HRMS** (ESI)  $m/z$  calculated for  $\text{C}_{30}\text{H}_{34}\text{N}_6\text{O}_4\text{Na}$   $[\text{M}+\text{Na}]^+$ : 565.2539, found: 565.2547.

---

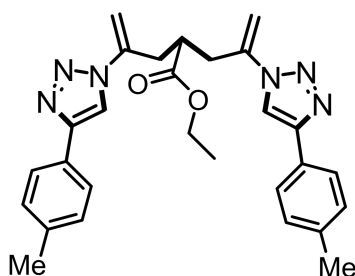

**(6d) 0.25 mmol scale:** Prepared following the general procedure showed above using 4-methylphenylacetylene (47.7  $\mu\text{L}$ , 0.55 mmol, 2.2 eq.), VA (224.8 mg, 0.55 mmol, 2.2 eq.), ethyl 4,4,4-trifluoro-3-oxobutanoate (36.6  $\mu\text{L}$ , 0.25 mmol, 1.0 eq.), triethylamine ( $\text{Et}_3\text{N}$ ) (139.0  $\mu\text{L}$ , 1.0 mmol, 4.0 eq.),  $\text{CuI}$  (190.4 mg, 0.1 mmol, 0.4 eq.) and  $\text{Pd}(\text{PPh}_3)_4$  (11.5 mg, 0.01 mmol, 0.04 eq.). The desired product was purified by a silica gel column chromatography (petroleumether/ethyl acetate=2:1) as yellow oily liquid (96.50 mg, 80%);  $^1\text{H NMR}$  (400 MHz, Chloroform-*d*)  $\delta$  7.97 (s, 2H), 7.73 (d,  $J = 7.6$  Hz, 4H), 7.22 (d,  $J = 7.6$  Hz, 4H), 5.46 (s, 2H), 5.09 (s, 2H), 4.08 (q,  $J = 7.0$  Hz, 2H), 3.17 (d,  $J = 6.7$  Hz, 4H), 3.08 (q,  $J = 7.5, 6.8$  Hz, 1H), 2.38 (s, 6H), 1.19 (t,  $J = 7.2$  Hz, 3H);  $^{13}\text{C NMR}$  (100 MHz, Chloroform-*d*)  $\delta$  173.6, 147.9, 140.6, 138.3, 129.5, 127.3, 125.8, 117.2, 106.1, 61.0, 41.8, 35.2, 21.3, 14.2. **HRMS** (ESI)  $m/z$  calculated for  $\text{C}_{28}\text{H}_{30}\text{N}_6\text{O}_2\text{Na}$   $[\text{M}+\text{Na}]^+$ : 505.2328, found: 505.2378.

---

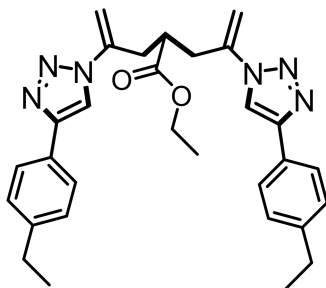

**(6e) 0.25 mmol scale:** Prepared following the general procedure showed above using 4-ethylphenylacetylene (77.8  $\mu\text{L}$ , 0.55 mmol, 2.2 eq.), VA (224.8 mg, 0.55 mmol, 2.2 eq.), ethyl 4,4,4-trifluoro-3-oxobutanoate (36.6  $\mu\text{L}$ , 0.25 mmol, 1.0 eq.), triethylamine ( $\text{Et}_3\text{N}$ ) (139.0  $\mu\text{L}$ , 1.0 mmol, 4.0 eq.),  $\text{CuI}$  (190.4 mg, 0.1 mmol, 0.4 eq.) and  $\text{Pd}(\text{PPh}_3)_4$  (11.5 mg, 0.01 mmol, 0.04 eq.). The desired product was purified by a silica gel column chromatography (petroleumether/ethyl acetate=2:1) as yellow oily liquid (103.33 mg, 81%);  $^1\text{H NMR}$  (400 MHz, Chloroform-*d*)  $\delta$  7.97 (s, 2H), 7.77 (d,  $J = 8.1$  Hz, 4H), 7.25 (d,  $J = 7.4$  Hz, 4H), 5.47 (s, 2H), 5.10 (s, 2H), 4.08 (q,  $J = 7.1$  Hz, 2H), 3.17 (d,  $J = 7.0$  Hz, 4H), 3.11 – 3.03 (m, 1H), 2.68 (q,  $J = 7.6$  Hz, 4H), 1.26 (t,  $J = 7.6$  Hz, 6H), 1.19 (t,  $J = 7.1$  Hz, 3H);  $^{13}\text{C NMR}$  (100 MHz, Chloroform-*d*)  $\delta$  173.6, 148.0, 144.7, 140.7, 128.4, 127.5, 125.9, 117.2, 106.1, 61.0, 41.8, 35.3, 28.7, 15.5, 14.2. **HRMS** (ESI)  $m/z$  calculated for  $\text{C}_{30}\text{H}_{34}\text{N}_6\text{O}_2\text{Na}$   $[\text{M}+\text{Na}]^+$ : 533.2641, found: 533.2657.

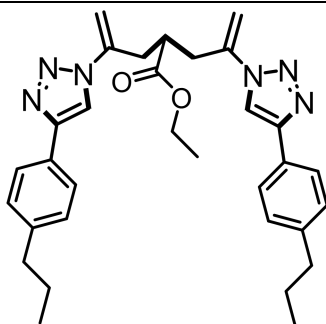

**(6f) 0.25 mmol scale:** Prepared following the general procedure showed above using 4-n-propyl phenylacetylene (87.2  $\mu\text{L}$ , 0.55 mmol, 2.2 eq.), VA (224.8 mg, 0.55 mmol, 2.2 eq.), ethyl 4,4,4-trifluoro-3-oxobutanoate (36.6  $\mu\text{L}$ , 0.25 mmol, 1.0 eq.), triethylamine ( $\text{Et}_3\text{N}$ ) (139.0  $\mu\text{L}$ , 1.0 mmol, 4.0 eq.),  $\text{CuI}$  (190.4 mg, 0.1 mmol, 0.4 eq.) and  $\text{Pd}(\text{PPh}_3)_4$  (11.5 mg, 0.01 mmol, 0.04 eq.). The desired product was purified by a silica gel column chromatography (petroleumether/ethyl acetate=2:1) as yellow oily



liquid (104.97 mg, 78%);  $^1\text{H NMR}$  (400 MHz, Chloroform-*d*)  $\delta$  7.97 (s, 2H), 7.76 (d,  $J = 7.9$  Hz, 4H), 7.22 (d,  $J = 7.9$  Hz, 4H), 5.47 (s, 2H), 5.09 (s, 2H), 4.08 (q,  $J = 7.1$  Hz, 2H), 3.17 (d,  $J = 7.0$  Hz, 4H), 3.10 – 3.02 (m, 1H), 2.61 (t,  $J = 7.6$  Hz, 4H), 1.70 – 1.64 (m, 4H), 1.19 (t,  $J = 7.1$  Hz, 3H), 0.96 (t,  $J = 7.3$  Hz, 6H);  $^{13}\text{C NMR}$  (100 MHz, Chloroform-*d*)  $\delta$  173.6, 148.0, 143.1, 140.6, 127.5, 125.8, 117.2, 106.1, 61.0, 41.8, 37.9, 35.3, 24.5, 14.2, 13.8. **HRMS** (ESI)  $m/z$  calculated for  $\text{C}_{32}\text{H}_{38}\text{N}_6\text{O}_2\text{Na}$   $[\text{M}+\text{Na}]^+$ : 561.2954, found: 561.2974.

---

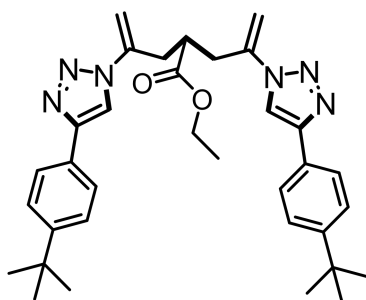

**(6g) 0.25 mmol scale:** Prepared following the general procedure showed above using 4-tert-butyl phenylacetylene (99.2  $\mu\text{L}$ , 0.55 mmol, 2.2 eq.), VA (224.8 mg, 0.55 mmol, 2.2 eq.), ethyl 4,4,4-trifluoro-3-oxobutanoate (36.6  $\mu\text{L}$ , 0.25 mmol, 1.0 eq.), triethylamine ( $\text{Et}_3\text{N}$ ) (139.0  $\mu\text{L}$ , 1.0 mmol, 4.0 eq.),  $\text{CuI}$  (190.4 mg, 0.1 mmol, 0.4 eq.) and  $\text{Pd}(\text{PPh}_3)_4$  (11.5 mg, 0.01 mmol, 0.04 eq.). The desired product was purified by a silica gel column chromatography (petroleum ether/ethyl acetate=2:1) as yellow oily liquid (107.60 mg, 76%);  $^1\text{H NMR}$  (400 MHz, Chloroform-*d*)  $\delta$  7.99 (s, 2H), 7.79 (d,  $J = 7.8$  Hz, 4H), 7.44 (d,  $J = 7.9$  Hz, 4H), 5.48 (s, 2H), 5.09 (s, 2H), 4.08 (q,  $J = 7.0$  Hz, 2H), 3.17 (d,  $J = 6.8$  Hz, 4H), 3.06 (q,  $J = 10.1, 5.8$  Hz, 1H), 1.35 (s, 18H), 1.19 (t,  $J = 7.0$  Hz, 3H);  $^{13}\text{C NMR}$  (100 MHz, Chloroform-*d*)  $\delta$  173.6, 151.5, 147.9, 140.6, 127.3, 125.8, 125.7, 117.2, 106.1, 61.0, 41.8, 35.3, 34.7, 31.3, 14.2. **HRMS** (ESI)  $m/z$  calculated for  $\text{C}_{34}\text{H}_{42}\text{N}_6\text{O}_2\text{Na}$   $[\text{M}+\text{Na}]^+$ : 589.3267, found: 589.3245.

---

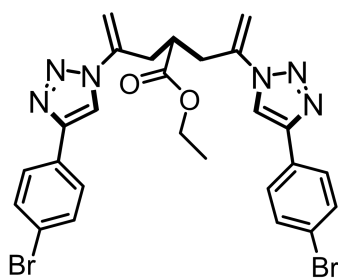

**(6h) 0.25 mmol scale:** Prepared following the general procedure showed above using 4-bromophenylacetylene (99.6 mg, 0.55 mmol, 2.2 eq.), VA (224.8 mg, 0.55 mmol, 2.2 eq.), ethyl 4,4,4-trifluoro-3-oxobutanoate (36.6  $\mu\text{L}$ , 0.25 mmol, 1.0 eq.), triethylamine ( $\text{Et}_3\text{N}$ ) (139.0  $\mu\text{L}$ , 1.0 mmol, 4.0 eq.),  $\text{CuI}$  (190.4 mg, 0.1 mmol, 0.4 eq.) and  $\text{Pd}(\text{PPh}_3)_4$  (11.5 mg, 0.01 mmol, 0.04 eq.). The desired product was purified by a silica gel column chromatography (petroleumether/ethyl acetate=2:1) as yellow oily liquid (115.90 mg, 78%);  $^1\text{H NMR}$  (400 MHz, Chloroform-*d*)  $\delta$  8.01 (s, 2H), 7.70 (d,  $J = 8.6$  Hz, 4H), 7.54 (d,  $J = 8.5$  Hz, 4H), 5.47 (s, 2H), 5.12 (s, 2H), 4.10 (q,  $J = 7.1$  Hz, 2H), 3.22 – 3.11 (m, 4H), 3.04 – 2.95 (m, 1H), 1.20 (t,  $J = 7.1$  Hz, 3H);  $^{13}\text{C NMR}$  (100 MHz, Chloroform-*d*)  $\delta$  173.5, 146.8, 140.6, 132.0, 129.0, 127.4, 122.4, 117.8, 106.7, 61.1, 41.6, 35.2, 14.3. **HRMS** (ESI)  $m/z$  calculated for  $\text{C}_{26}\text{H}_{24}\text{Br}_2\text{N}_6\text{O}_2\text{Na}$   $[\text{M}+\text{Na}]^+$ : 635.0205, found: 635.0227.

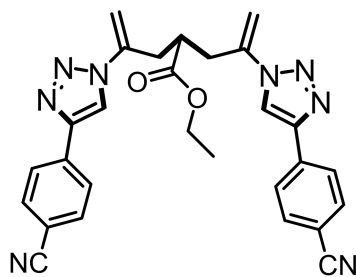

**(6i) 0.25 mmol scale:** Prepared following the general procedure showed above using 4-cyanophenylacetylene (69.9 mg, 0.55 mmol, 2.2 eq.), VA (224.8 mg, 0.55 mmol, 2.2 eq.), ethyl 4,4,4-trifluoro-3-oxobutanoate (36.6  $\mu\text{L}$ , 0.25 mmol, 1.0 eq.), triethylamine ( $\text{Et}_3\text{N}$ ) (139.0  $\mu\text{L}$ , 1.0 mmol, 4.0 eq.),  $\text{CuI}$  (190.4 mg, 0.1 mmol, 0.4 eq.) and  $\text{Pd}(\text{PPh}_3)_4$  (11.5 mg, 0.01 mmol, 0.04 eq.). The desired product was purified by a silica gel column chromatography (petroleumether/ethyl acetate=2:1) as yellow oily liquid (95.80 mg, 76%);  $^1\text{H NMR}$  (400 MHz, Chloroform-*d*)  $\delta$  8.14 (s, 2H), 7.99 – 7.94 (m, 4H), 7.72 (d,  $J = 8.4$  Hz, 4H), 5.51 (s, 2H), 5.17 (s, 2H), 4.11 (q,  $J = 7.1$  Hz,

2H), 3.19 (d,  $J = 7.1$  Hz, 4H), 3.05 – 2.98 (m, 1H), 1.21 (t,  $J = 7.1$  Hz, 3H);  $^{13}\text{C}$  NMR (100 MHz, Chloroform- $d$ )  $\delta$  173.3, 146.0, 140.5, 134.4, 132.7, 126.2, 118.9, 118.6, 111.9, 107.2, 61.1, 41.6, 35.3, 14.3. **HRMS** (ESI)  $m/z$  calculated for  $\text{C}_{28}\text{H}_{24}\text{N}_6\text{O}_2\text{Na}$   $[\text{M}+\text{Na}]^+$ : 527.1920, found: 527.1928.

---

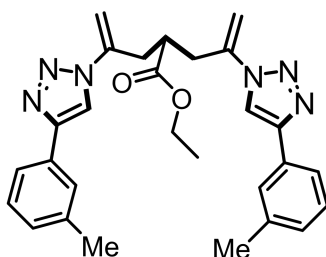

**(6j) 0.25 mmol scale:** Prepared following the general procedure showed above using 3-methylphenylacetylene (71.0  $\mu\text{L}$ , 0.55 mmol, 2.2 eq.), VA (224.8 mg, 0.55 mmol, 2.2 eq.), ethyl 4,4,4-trifluoro-3-oxobutanoate (36.6  $\mu\text{L}$ , 0.25 mmol, 1.0 eq.), triethylamine ( $\text{Et}_3\text{N}$ ) (139.0  $\mu\text{L}$ , 1.0 mmol, 4.0 eq.),  $\text{CuI}$  (190.4 mg, 0.1 mmol, 0.4 eq.) and  $\text{Pd}(\text{PPh}_3)_4$  (11.5 mg, 0.01 mmol, 0.04 eq.). The desired product was purified by a silica gel column chromatography (petroleum ether/ethyl acetate=2:1) as yellow oily liquid (98.90 mg, 82%);  $^1\text{H}$  NMR (400 MHz, Chloroform- $d$ )  $\delta$  8.01 (s, 2H), 7.70 (s, 2H), 7.63 (d,  $J = 7.7$  Hz, 2H), 7.30 (t,  $J = 7.6$  Hz, 2H), 7.15 (d,  $J = 7.6$  Hz, 2H), 5.47 (s, 2H), 5.10 (s, 2H), 4.08 (q,  $J = 7.1$  Hz, 2H), 3.17 (d,  $J = 6.9$  Hz, 4H), 3.08 (q,  $J = 7.0, 6.6$  Hz, 1H), 2.39 (s, 6H), 1.19 (t,  $J = 7.1$  Hz, 3H);  $^{13}\text{C}$  NMR (100 MHz, Chloroform- $d$ )  $\delta$  173.6, 148.0, 140.7, 138.5, 123.0, 129.2, 128.8, 126.6, 123.0, 117.5, 106, 61.00, 41.8, 35.2, 21.4, 14.2. **HRMS** (ESI)  $m/z$  calculated for  $\text{C}_{28}\text{H}_{30}\text{N}_6\text{O}_2\text{Na}$   $[\text{M}+\text{Na}]^+$ : 505.2328, found: 505.2386.

---

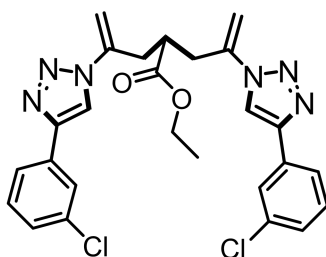

**(6k) 0.25 mmol scale:** Prepared following the general procedure showed above using 3-chlorophenylacetylene (67.7  $\mu\text{L}$ , 0.55 mmol, 2.2 eq.), VA (224.8 mg, 0.55 mmol, 2.2 eq.), ethyl 4,4,4-trifluoro-3-oxobutanoate (36.6  $\mu\text{L}$ , 0.25 mmol, 1.0 eq.),

triethylamine (Et<sub>3</sub>N) (139.0 μL, 1.0 mmol, 4.0 eq.), CuI (190.4 mg, 0.1 mmol, 0.4 eq.) and Pd(PPh<sub>3</sub>)<sub>4</sub> (11.5 mg, 0.01 mmol, 0.04 eq.). The desired product was purified by a silica gel column chromatography (petroleumether/ethyl acetate=2:1) as yellow oily liquid (97.90 mg, 75%); **<sup>1</sup>H NMR** (400 MHz, Chloroform-*d*) δ 8.05 (s, 2H), 7.86 (s, 2H), 7.74 (d, *J* = 7.4 Hz, 2H), 7.38 – 7.28 (m, 4H), 5.48 (s, 2H), 5.13 (s, 2H), 4.10 (q, *J* = 7.1 Hz, 2H), 3.17 (d, *J* = 5.7 Hz, 4H), 3.04 – 2.96 (m, 1H), 1.20 (t, *J* = 7.1 Hz, 3H); **<sup>13</sup>C NMR** (100 MHz, Chloroform-*d*) δ 173.5, 146.6, 140.6, 134.9, 131.8, 130.2, 128.4, 125.9, 124.0, 118.1, 106.8, 61.1, 41.6, 35.3, 14.3. **HRMS** (ESI) *m/z* calculated for C<sub>26</sub>H<sub>24</sub>Cl<sub>2</sub>N<sub>6</sub>O<sub>2</sub>Na [M+Na]<sup>+</sup>: 545.1236, found: 545.1356.

---

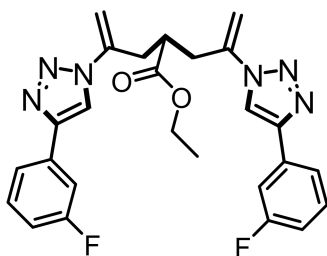

**(6l) 0.25 mmol scale:** Prepared following the general procedure showed above using 3-fluorophenylacetylene (63.6 μL, 0.55 mmol, 2.2 eq.), VA (224.8 mg, 0.55 mmol, 2.2 eq.), ethyl 4,4,4-trifluoro-3-oxobutanoate (36.6 μL, 0.25 mmol, 1.0 eq.), triethylamine (Et<sub>3</sub>N) (139.0 μL, 1.0 mmol, 4.0 eq.), CuI (190.4 mg, 0.1 mmol, 0.4 eq.) and Pd(PPh<sub>3</sub>)<sub>4</sub> (11.5 mg, 0.01 mmol, 0.04 eq.). The desired product was purified by a silica gel column chromatography (petroleumether/ethyl acetate=2:1) as yellow oily liquid (88.30 mg, 72%); **<sup>1</sup>H NMR** (400 MHz, Chloroform-*d*) δ 8.05 (s, 2H), 7.65 – 7.55 (m, 4H), 7.42 – 7.33 (m, 2H), 7.03 (t, *J* = 8.5 Hz, 2H), 5.49 (s, 2H), 5.13 (s, 2H), 4.10 (q, *J* = 7.1 Hz, 2H), 3.17 (d, *J* = 6.1 Hz, 4H), 3.02 (q, *J* = 6.6 Hz, 1H), 1.20 (t, *J* = 7.1 Hz, 3H); **<sup>13</sup>C NMR** (100 MHz, Chloroform-*d*) δ 173.5, 164.4 (d, *J* = 247.4 Hz), 146.8 (d, *J* = 2.5 Hz), 140.6, 132.2 (d, *J* = 8.6 Hz), 130.5 (d, *J* = 8.6 Hz), 121.5 (d, *J* = 2.8 Hz), 118.1, 115.4 (d, *J* = 21.0 Hz), 113.0 (d, *J* = 23.0 Hz), 106.8, 61.1, 41.6, 35.3, 14.2. **HRMS** (ESI) *m/z* calculated for C<sub>26</sub>H<sub>24</sub>F<sub>2</sub>N<sub>6</sub>O<sub>2</sub>Na [M+Na]<sup>+</sup>: 513.1827, found: 513.1878.

---

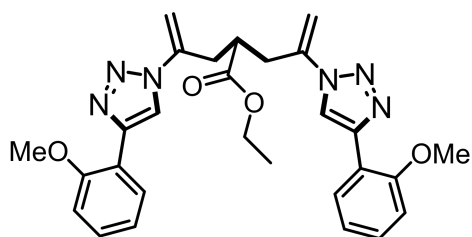

**(6m) 0.25 mmol scale:** Prepared following the general procedure showed above using 2-methoxyphenylacetylene (71.1  $\mu$ L, 0.55 mmol, 2.2 eq.), VA (224.8 mg, 0.55 mmol, 2.2 eq.), ethyl 4,4,4-trifluoro-3-oxobutanoate (36.6  $\mu$ L, 0.25 mmol, 1.0 eq.), triethylamine ( $\text{Et}_3\text{N}$ ) (139.0  $\mu$ L, 1.0 mmol, 4.0 eq.), CuI (190.4 mg, 0.1 mmol, 0.4 eq.) and  $\text{Pd}(\text{PPh}_3)_4$  (11.5 mg, 0.01 mmol, 0.04 eq.). The desired product was purified by a silica gel column chromatography (petroleumether/ethyl acetate=2:1) as yellow oily liquid 102.85 mg, 80%);  $^1\text{H NMR}$  (400 MHz, Chloroform-*d*)  $\delta$  8.33 (d,  $J = 7.7$  Hz, 2H), 8.25 (s, 2H), 7.35 – 7.29 (m, 2H), 7.07 (t,  $J = 7.5$  Hz, 2H), 6.97 (d,  $J = 8.3$  Hz, 2H), 5.47 (s, 2H), 5.07 (s, 2H), 4.08 (q,  $J = 7.1$  Hz, 2H), 3.94 (s, 6H), 3.19 (s, 5H), 1.19 (t,  $J = 7.1$  Hz, 3H);  $^{13}\text{C NMR}$  (100 MHz, Chloroform-*d*)  $\delta$  173.6, 155.8, 143.2, 140.8, 129.2, 127.8, 121.0, 120.7, 119.0, 110.8, 105.7, 60.9, 55.5, 41.9, 35.2, 14.2. **HRMS** (ESI)  $m/z$  calculated for  $\text{C}_{28}\text{H}_{30}\text{N}_6\text{O}_4\text{Na}$   $[\text{M}+\text{Na}]^+$ : 537.2227, found: 537.2256.

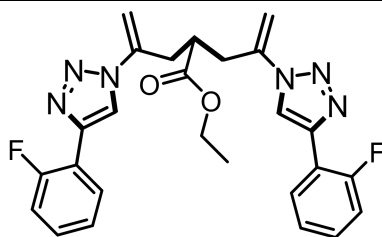

**(6n) 0.25 mmol scale:** Prepared following the general procedure showed above using 2-fluorophenylacetylene (62.3  $\mu$ L, 0.55 mmol, 2.2 eq.), VA (224.8 mg, 0.55 mmol, 2.2 eq.), ethyl 4,4,4-trifluoro-3-oxobutanoate (36.6  $\mu$ L, 0.25 mmol, 1.0 eq.), triethylamine ( $\text{Et}_3\text{N}$ ) (139.0  $\mu$ L, 1.0 mmol, 4.0 eq.), CuI (190.4 mg, 0.1 mmol, 0.4 eq.) and  $\text{Pd}(\text{PPh}_3)_4$  (11.5 mg, 0.01 mmol, 0.04 eq.). The desired product was purified by a silica gel column chromatography (petroleumether/ethyl acetate=2:1) as yellow oily liquid (91.90 mg, 75%);  $^1\text{H NMR}$  (400 MHz, Chloroform-*d*)  $\delta$  8.19 (t,  $J = 7.6$  Hz, 2H), 8.08 (d,  $J = 3.4$  Hz, 2H), 7.27 – 7.21 (m, 2H), 7.18 – 7.13 (m, 2H), 7.09 – 7.02

(m, 2H), 5.41 (s, 2H), 5.04 (s, 2H), 4.01 (q,  $J = 7.2$  Hz, 2H), 3.12 (d,  $J = 6.8$  Hz, 4H), 3.04 (d,  $J = 6.8$  Hz, 1H), 1.12 (t,  $J = 7.1$  Hz, 3H);  $^{13}\text{C}$  NMR (100 MHz, Chloroform-*d*)  $\delta$  173.5, 160.6 (d,  $J = 249.6$  Hz), 141.3 (d,  $J = 2.2$  Hz), 140.6, 129.6 (d,  $J = 8.5$  Hz), , 128.0 (d  $J = 3.4$  Hz), 124.6 (d,  $J = 3.4$  Hz), 120.6 (d,  $J = 12.9$  Hz), 118.2 (d,  $J = 12.9$  Hz), 115.6 (d,  $J = 21.6$  Hz), 106.3, 61.0, 41.67, 35.2, 14.2. **HRMS** (ESI)  $m/z$  calculated for  $\text{C}_{26}\text{H}_{24}\text{F}_2\text{N}_6\text{O}_2\text{Na}$   $[\text{M}+\text{Na}]^+$ : 513.1827, found: 513.1867.

---

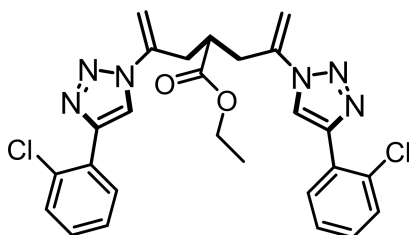

**(6o) 0.25 mmol scale:** Prepared following the general procedure showed above using 2-chlorophenylacetylene (66.8  $\mu\text{L}$ , 0.55 mmol, 2.2 eq.), VA (224.8 mg, 0.55 mmol, 2.2 eq.), ethyl 4,4,4-trifluoro-3-oxobutanoate (36.6  $\mu\text{L}$ , 0.25 mmol, 1.0 eq.), triethylamine ( $\text{Et}_3\text{N}$ ) (139.0  $\mu\text{L}$ , 1.0 mmol, 4.0 eq.),  $\text{CuI}$  (190.4 mg, 0.1 mmol, 0.4 eq.) and  $\text{Pd}(\text{PPh}_3)_4$  (11.5 mg, 0.01 mmol, 0.04 eq.). The desired product was purified by a silica gel column chromatography (petroleum ether/ethyl acetate=2:1) as yellow oily liquid (93.98 mg, 72%);  $^1\text{H}$  NMR (400 MHz, Chloroform-*d*)  $\delta$  8.41 (s, 2H), 8.23 (d,  $J = 7.9$  Hz, 2H), 7.45 (d,  $J = 6.5$  Hz, 2H), 7.36 (t,  $J = 6.9$  Hz, 2H), 7.29 (t,  $J = 7.6$  Hz, 2H), 5.51 (s, 2H), 5.14 (s, 2H), 4.10 (q,  $J = 7.2$  Hz, 2H), 3.21 (d,  $J = 6.4$  Hz, 4H), 3.17 – 3.10 (m, 1H), 1.20 (t,  $J = 7.1$  Hz, 3H);  $^{13}\text{C}$  NMR (100 MHz, Chloroform-*d*)  $\delta$  173.5, 144.1, 140.6, 131.4, 130.2, 123.0, 129.2, 128.8, 127.2, 121.0, 106.5, 61.0, 41.7, 35.2, 14.3, 14.2. **HRMS** (ESI)  $m/z$  calculated for  $\text{C}_{26}\text{H}_{24}\text{Cl}_2\text{N}_6\text{O}_2\text{Na}$   $[\text{M}+\text{Na}]^+$ : 545.1236, found: 545.1287.

---

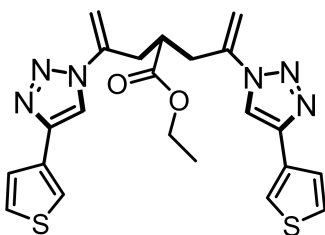

**(6p) 0.25 mmol scale:** Prepared following the general procedure showed above using 2-ethynylthiophene (55.1  $\mu\text{L}$ , 0.55 mmol, 2.2 eq.), VA (224.8 mg, 0.55 mmol,

2.2 eq.), ethyl 4,4,4-trifluoro-3-oxobutanoate (36.6  $\mu\text{L}$ , 0.25 mmol, 1.0 eq.), triethylamine ( $\text{Et}_3\text{N}$ ) (139.0  $\mu\text{L}$ , 1.0 mmol, 4.0 eq.),  $\text{CuI}$  (190.4 mg, 0.1 mmol, 0.4 eq.) and  $\text{Pd}(\text{PPh}_3)_4$  (11.5 mg, 0.01 mmol, 0.04 eq.). The desired product was purified by a silica gel column chromatography (petroleumether/ethyl acetate=2:1) as yellow oily liquid (88.56 mg, 76%);  $^1\text{H NMR}$  (400 MHz, Chloroform-*d*)  $\delta$  7.91 (s, 2H), 7.73 (s, 2H), 7.47 (d,  $J = 5.0$  Hz, 2H), 7.42 – 7.34 (m, 2H), 5.47 (s, 2H), 5.10 (s, 2H), 4.09 (q,  $J = 6.9$  Hz, 2H), 3.16 (d,  $J = 6.9$  Hz, 4H), 3.03 (q,  $J = 7.2$  Hz, 1H), 1.19 (t,  $J = 7.1$  Hz, 3H);  $^{13}\text{C NMR}$  (100 MHz, Chloroform-*d*)  $\delta$  173.5, 144.1, 140.5, 131.3, 126.4, 125.9, 121.7, 117.3, 106.3, 61.0, 41.7, 35.3, 14.2. **HRMS** (ESI)  $m/z$  calculated for  $\text{C}_{22}\text{H}_{34}\text{N}_6\text{O}_2\text{S}_2\text{Na}$   $[\text{M}+\text{Na}]^+$ : 437.2641, found: 437.2641.

---

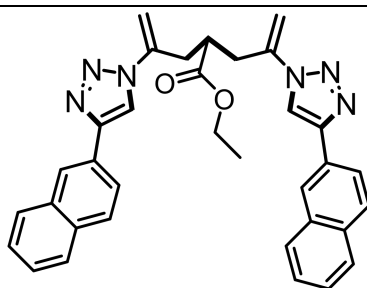

**(6q) 0.25 mmol scale:** Prepared following the general procedure showed above using 2-ethynyl naphthalene (83.7 mg, 0.55 mmol, 2.2 eq.), VA (224.8 mg, 0.55 mmol, 2.2 eq.), ethyl 4,4,4-trifluoro-3-oxobutanoate (36.6  $\mu\text{L}$ , 0.25 mmol, 1.0 eq.), triethylamine ( $\text{Et}_3\text{N}$ ) (139.0  $\mu\text{L}$ , 1.0 mmol, 4.0 eq.),  $\text{CuI}$  (190.4 mg, 0.1 mmol, 0.4 eq.) and  $\text{Pd}(\text{PPh}_3)_4$  (11.5 mg, 0.01 mmol, 0.04 eq.). The desired product was purified by a silica gel column chromatography (petroleumether/ethyl acetate=2:1) as yellow oily liquid (98.38 mg, 71%);  $^1\text{H NMR}$  (400 MHz, Chloroform-*d*)  $\delta$  8.35 (s, 2H), 8.15 (s, 2H), 7.92 (d,  $J = 10.2$  Hz, 2H), 7.85 – 7.79 (m, 6H), 7.47 (q,  $J = 5.2, 4.4$  Hz, 4H), 5.52 (s, 2H), 5.14 (s, 2H), 4.11 (q,  $J = 7.1$  Hz, 2H), 3.21 (d,  $J = 6.9$  Hz, 4H), 3.11 (q,  $J = 6.7$  Hz, 1H), 1.21 (t,  $J = 7.1$  Hz, 3H);  $^{13}\text{C NMR}$  (100 MHz, Chloroform-*d*)  $\delta$  173.6, 147.9, 140.7, 133.5, 133.3, 128.6, 128.3, 127.8, 127.4, 126.5, 126.3, 123.9, 117.9, 106.5, 61.1, 41.7, 35.3, 14.3. **HRMS** (ESI)  $m/z$  calculated for  $\text{C}_{34}\text{H}_{30}\text{N}_6\text{O}_2\text{Na}$   $[\text{M}+\text{Na}]^+$ : 577.2328, found: 577.2356.

---

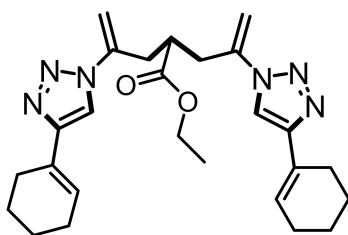

**(6r) 0.25 mmol scale:** Prepared following the general procedure showed above using 1-ethynylcyclohex-1-ene (64.7  $\mu\text{L}$ , 0.55 mmol, 2.2 eq.), VA (224.8 mg, 0.55 mmol, 2.2 eq.), ethyl 4,4,4-trifluoro-3-oxobutanoate (36.6  $\mu\text{L}$ , 0.25 mmol, 1.0 eq.), triethylamine ( $\text{Et}_3\text{N}$ ) (139.0  $\mu\text{L}$ , 1.0 mmol, 4.0 eq.),  $\text{CuI}$  (190.4 mg, 0.1 mmol, 0.4 eq.) and  $\text{Pd}(\text{PPh}_3)_4$  (11.5 mg, 0.01 mmol, 0.04 eq.). The desired product was purified by a silica gel column chromatography (petroleumether/ethyl acetate=2:1) as yellow oily liquid (80.90 mg, 70%);  $^1\text{H NMR}$  (400 MHz, Chloroform-*d*)  $\delta$  7.60 (s, 2H), 6.59 (s, 2H), 5.36 (s, 2H), 5.01 (s, 2H), 4.07 (d,  $J = 7.1$  Hz, 2H), 3.10 (d,  $J = 7.1$  Hz, 4H), 2.98 – 2.94 (m, 1H), 2.39 (s, 4H), 2.22 (s, 4H), 1.81 – 1.75 (m, 4H), 1.68 (q,  $J = 5.8, 4.8$  Hz, 4H), 1.18 (s, 3H);  $^{13}\text{C NMR}$  (100 MHz, Chloroform-*d*)  $\delta$  173.6, 149.4, 126.8, 125.8, 116.1, 105.6, 60.9, 41.7, 35.2, 26.3, 25.3, 22.4, 22.2, 14.2. **HRMS** (ESI)  $m/z$  calculated for  $\text{C}_{26}\text{H}_{34}\text{N}_6\text{O}_2\text{Na}$   $[\text{M}+\text{Na}]^+$ : 485.2641, found: 485.2661.

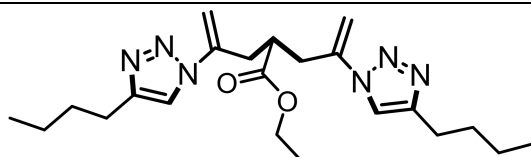

**(6s) 0.25 mmol scale:** Prepared following the general procedure showed above using 1-hexyne (63.2  $\mu\text{L}$ , 0.55 mmol, 2.2 eq.), VA (224.8 mg, 0.55 mmol, 2.2 eq.), ethyl 4,4,4-trifluoro-3-oxobutanoate (36.6  $\mu\text{L}$ , 0.25 mmol, 1.0 eq.), triethylamine ( $\text{Et}_3\text{N}$ ) (139.0  $\mu\text{L}$ , 1.0 mmol, 4.0 eq.),  $\text{CuI}$  (190.4 mg, 0.1 mmol, 0.4 eq.) and  $\text{Pd}(\text{PPh}_3)_4$  (11.5 mg, 0.01 mmol, 0.04 eq.). The desired product was purified by a silica gel column chromatography (petroleumether/ethyl acetate=2:1) as yellow oily liquid (82.85 mg, 80%);  $^1\text{H NMR}$  (400 MHz, Chloroform-*d*)  $\delta$  7.51 (s, 2H), 5.35 (s, 2H), 5.00 (s, 2H), 4.07 (q,  $J = 7.1$  Hz, 2H), 3.10 (d,  $J = 6.8$  Hz, 4H), 3.02 (q,  $J = 7.1, 6.6$  Hz, 1H), 2.72 (t,  $J = 7.8$  Hz, 4H), 1.71-1.63 (m, 4H), 1.45-1.36 (m, 4H), 1.19 (t,  $J = 7.1$  Hz, 3H), 0.95 (t,  $J = 7.3$  Hz, 6H);  $^{13}\text{C NMR}$  (100 MHz, Chloroform-*d*)  $\delta$  173.6, 148.6, 140.7, 118.6, 105.3, 60.8, 41.7, 35.1, 31.4, 25.3, 22.3, 14.2, 13.8. **HRMS** (ESI)  $m/z$  calculated for



C<sub>22</sub>H<sub>34</sub>N<sub>6</sub>O<sub>2</sub>Na [M+Na]<sup>+</sup>: 437.2641, found: 437.2669.

---

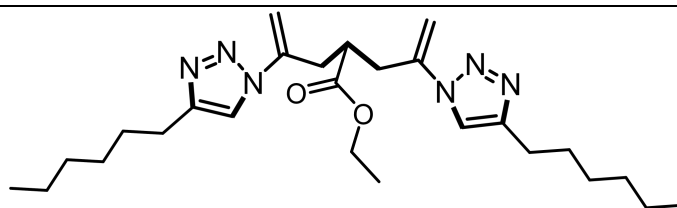

**(6t) 0.25 mmol scale:** Prepared following the general procedure showed above using 1-octyne (81.1  $\mu$ L, 0.55 mmol, 2.2 eq.), VA (224.8 mg, 0.55 mmol, 2.2 eq.), ethyl 4,4,4-trifluoro-3-oxobutanoate (36.6  $\mu$ L, 0.25 mmol, 1.0 eq.), triethylamine (Et<sub>3</sub>N) (139.0  $\mu$ L, 1.0 mmol, 4.0 eq.), CuI (190.4 mg, 0.1 mmol, 0.4 eq.) and Pd(PPh<sub>3</sub>)<sub>4</sub> (11.5 mg, 0.01 mmol, 0.04 eq.). The desired product was purified by a silica gel column chromatography (petroleumether/ethyl acetate=2:1) as yellow oily liquid (92.90 mg, 79%); <sup>1</sup>H NMR (400 MHz, Chloroform-*d*)  $\delta$  7.50 (s, 2H), 5.34 (s, 2H), 5.00 (s, 2H), 4.07 (q, *J* = 7.1 Hz, 2H), 3.10 (d, *J* = 6.8 Hz, 4H), 3.02 (q, *J* = 7.0, 6.6 Hz, 1H), 2.71 (t, *J* = 7.8 Hz, 4H), 1.67 (q, *J* = 7.6 Hz, 4H), 1.40 – 1.28 (m, 12H), 1.19 (t, *J* = 7.1 Hz, 3H), 0.92 – 0.85 (m, 6H); <sup>13</sup>C NMR (100 MHz, Chloroform-*d*)  $\delta$  173.6, 148.6, 140.7, 118.5, 105.3, 60.8, 41.8, 35.1, 31.6, 29.3, 29.0, 25.6, 22.6, 14.2, 14.1., 13.8. HRMS (ESI) *m/z* calculated for C<sub>26</sub>H<sub>42</sub>N<sub>6</sub>O<sub>2</sub>Na [M+Na]<sup>+</sup>: 493.3267, found: 493.3247.

---

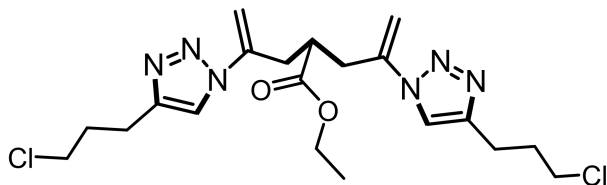

**(6u) 0.25 mmol scale:** Prepared following the general procedure showed above using 5-chloropentyne (58.3  $\mu$ L, 0.55 mmol, 2.2 eq.), VA (224.8 mg, 0.55 mmol, 2.2 eq.), ethyl 4,4,4-trifluoro-3-oxobutanoate (36.6  $\mu$ L, 0.25 mmol, 1.0 eq.), triethylamine (Et<sub>3</sub>N) (139.0  $\mu$ L, 1.0 mmol, 4.0 eq.), CuI (190.4 mg, 0.1 mmol, 0.4 eq.) and Pd(PPh<sub>3</sub>)<sub>4</sub> (11.5 mg, 0.01 mmol, 0.04 eq.). The desired product was purified by a silica gel column chromatography (petroleumether/ethyl acetate=2:1) as yellow oily liquid (86.50 mg, 76%); <sup>1</sup>H NMR (400 MHz, Chloroform-*d*)  $\delta$  7.58 (s, 2H), 5.36 (s, 2H), 5.03 (s, 2H), 4.08 (q, *J* = 7.2 Hz, 2H), 3.60 (t, *J* = 6.4 Hz, 4H), 3.10 (d, *J* = 7.0 Hz, 4H), 3.00 (q, *J* = 6.7 Hz, 1H), 2.90 (t, *J* = 7.3 Hz, 4H), 2.23-2.16 (m, 4H), 1.20 (t,

$J = 7.2$  Hz, 3H);  $^{13}\text{C}$  NMR (100 MHz, Chloroform- $d$ )  $\delta$  173.5, 146.6, 140.6, 119.2, 105.7, 60.9, 44.2, 41.6, 35.1, 31.7, 22.6, 14.2. HRMS (ESI)  $m/z$  calculated for  $\text{C}_{20}\text{H}_{28}\text{N}_6\text{O}_2\text{Na}$   $[\text{M}+\text{Na}]^+$ : 477.1549, found: 477.1549.

---

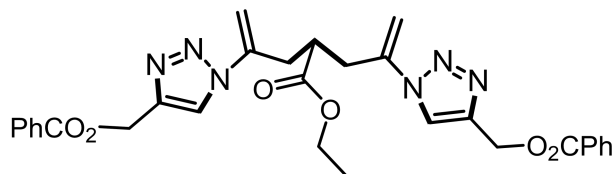

**(6v) 0.25 mmol scale:** Prepared following the general procedure showed above using prop-2-yn-1-yl benzoate (88.0 mg, 0.55 mmol, 2.2 eq.), VA (224.8 mg, 0.55 mmol, 2.2 eq.), ethyl 4,4,4-trifluoro-3-oxobutanoate (36.6  $\mu\text{L}$ , 0.25 mmol, 1.0 eq.), triethylamine ( $\text{Et}_3\text{N}$ ) (139.0  $\mu\text{L}$ , 1.0 mmol, 4.0 eq.),  $\text{CuI}$  (190.4 mg, 0.1 mmol, 0.4 eq.) and  $\text{Pd}(\text{PPh}_3)_4$  (11.5 mg, 0.01 mmol, 0.04 eq.). The desired product was purified by a silica gel column chromatography (petroleumether/ethyl acetate=2:1) as yellow oily liquid (111.19 mg, 78%);  $^1\text{H}$  NMR (400 MHz, Chloroform- $d$ )  $\delta$  8.06 (d,  $J = 8.2$  Hz, 4H), 7.93 (s, 2H), 7.55 (d,  $J = 8.7$  Hz, 2H), 7.43 (t,  $J = 7.7$  Hz, 4H), 5.47 (s, 4H), 5.41 (d,  $J = 1.8$  Hz, 2H), 5.07 (s, 2H), 4.04 (q,  $J = 7.1$  Hz, 2H), 3.12 (d,  $J = 6.5$  Hz, 4H), 3.08 – 3.02 (m, 1H), 1.15 (t,  $J = 7.1$  Hz, 3H);  $^{13}\text{C}$  NMR (100 MHz, Chloroform- $d$ )  $\delta$  173.4, 166.4, 143.1, 140.5, 133.3, 130.0, 128.4, 122.0, 106.5, 61.0, 57.9, 41.6, 35.01, 14.2. HRMS (ESI)  $m/z$  calculated for  $\text{C}_{30}\text{H}_{30}\text{N}_6\text{O}_6\text{Na}$   $[\text{M}+\text{Na}]^+$ : 593.2125, found: 593.2165.

---

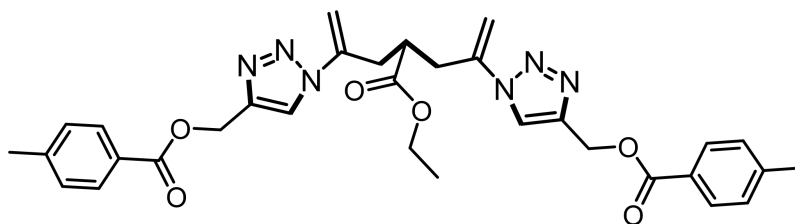

**(6w) 0.25 mmol scale:** Prepared following the general procedure showed above using prop-2-yn-1-yl 4-methylbenzoate (95.7 mg, 0.55 mmol, 2.2 eq.), VA (224.8 mg, 0.55 mmol, 2.2 eq.), ethyl 4,4,4-trifluoro-3-oxobutanoate (36.6  $\mu\text{L}$ , 0.25 mmol, 1.0 eq.), triethylamine ( $\text{Et}_3\text{N}$ ) (139.0  $\mu\text{L}$ , 1.0 mmol, 4.0 eq.),  $\text{CuI}$  (190.4 mg, 0.1 mmol, 0.4 eq.) and  $\text{Pd}(\text{PPh}_3)_4$  (11.5 mg, 0.01 mmol, 0.04 eq.). The desired product was purified by a silica gel column chromatography (petroleumether/ethyl acetate=2:1) as

yellow oily liquid (107.70 mg, 72%);  $^1\text{H NMR}$  (400 MHz, Chloroform-*d*)  $\delta$  7.94 (d,  $J$  = 7.9 Hz, 6H), 7.22 (d,  $J$  = 8.0 Hz, 4H), 5.45 (s, 4H), 5.41 (d,  $J$  = 1.8 Hz, 2H), 5.06 (s, 2H), 4.04 (q,  $J$  = 7.2 Hz, 2H), 3.11 (d,  $J$  = 6.3 Hz, 4H), 3.09 – 3.02 (m, 1H), 2.39 (s, 6H), 1.15 (t,  $J$  = 7.1 Hz, 3H);  $^{13}\text{C NMR}$  (100 MHz, Chloroform-*d*)  $\delta$  173.4, 166.5, 144.0, 143.3, 140.5, 129.8, 129.1, 126.9, 121.9, 106.5, 61.0, 57.8, 41.6, 21.7, 14.2. **HRMS** (ESI)  $m/z$  calculated for  $\text{C}_{32}\text{H}_{24}\text{N}_6\text{O}_6\text{Na}$   $[\text{M}+\text{Na}]^+$ :621.2438, found: 621.2445.

---

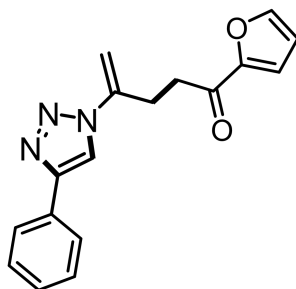

(6x) **0.25 mmol scale:** Prepared following the general procedure showed above using phenylacetylene (60.4  $\mu\text{L}$ , 0.55 mmol, 2.2 eq.), VA (224.8 mg, 0.55 mmol, 2.2 eq.), 4,4,4-trifluoro-1-(2-furanyl)-1,3-butanedione (37.1  $\mu\text{L}$ , 0.25 mmol, 1.0 eq.), triethylamine ( $\text{Et}_3\text{N}$ ) (139.0  $\mu\text{L}$ , 1.0 mmol, 4.0 eq.),  $\text{CuI}$  (190.4 mg, 0.1 mmol, 0.4 eq.) and  $\text{Pd}(\text{PPh}_3)_4$  (11.5 mg, 0.01 mmol, 0.04 eq.). The desired product was purified by a silica gel column chromatography (petroleum ether/ethyl acetate=2:1) as yellow oily liquid (57.16 mg, 78%);  $^1\text{H NMR}$  (400 MHz, Chloroform-*d*)  $\delta$  8.02 (s, 1H), 7.87 (d,  $J$  = 8.8 Hz, 2H), 7.56 (s, 1H), 7.45 (t,  $J$  = 7.5 Hz, 2H), 7.36 (t,  $J$  = 7.4 Hz, 1H), 7.21 (d,  $J$  = 3.6 Hz, 1H), 6.53 (d,  $J$  = 3.6 Hz, 1H), 5.48 (s, 1H), 5.11 (s, 1H), 3.26 – 3.18 (m, 4H);  $^{13}\text{C NMR}$  (100 MHz, Chloroform-*d*)  $\delta$  191.3, 143.8, 142.4, 134.0, 132.3, 130.1, 128.9, 128.5, 128.3, 117.4, 105.0, 37.1, 27.9. **HRMS** (ESI)  $m/z$  calculated for  $\text{C}_{17}\text{H}_{15}\text{N}_3\text{O}_2\text{Na}$   $[\text{M}+\text{Na}]^+$ : 316.1062, found: 316.1036.

---

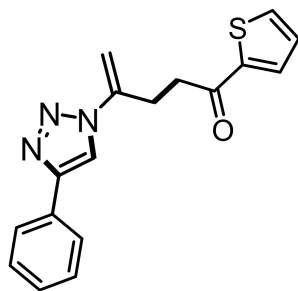

(6y) **0.25 mmol scale:** Prepared following the general procedure showed above using phenylacetylene (60.4  $\mu$ L, 0.55 mmol, 2.2 eq.), VA (224.8 mg, 0.55 mmol, 2.2 eq.), 4,4,4-trifluoro-1-(thiophen-2-yl)butane-1,3-dione (38.6  $\mu$ L, 0.25 mmol, 1.0 eq.), triethylamine (Et<sub>3</sub>N) (139.0  $\mu$ L, 1.0 mmol, 4.0 eq.), CuI (190.4 mg, 0.1 mmol, 0.4 eq.) and Pd(PPh<sub>3</sub>)<sub>4</sub> (11.5 mg, 0.01 mmol, 0.04 eq.). The desired product was purified by a silica gel column chromatography (petroleum ether/ethyl acetate=2:1) as yellow oily liquid (58.72 mg, 76%); **<sup>1</sup>H NMR** (400 MHz, Chloroform-d)  $\delta$  8.05 (s, 1H), 7.87 (d, J = 7.4 Hz, 2H), 7.70 (s, 1H), 7.62 (d, J = 4.8 Hz, 1H), 7.42 (d, J = 7.3 Hz, 2H), 7.35 (t, J = 7.1 Hz, 1H), 7.11 (s, 1H), 5.47 (s, 1H), 5.11 (s, 1H), 3.26 (s, 4H); **<sup>13</sup>C NMR** (100 MHz, Chloroform-d)  $\delta$  187.4, 152.4, 147.8, 146.6, 142.4, 130.2, 128.9, 128.5, 125.9, 117.5, 117.3, 112.3, 105.0, 36.1, 27.4. **HRMS** (ESI) m/z calculated for C<sub>17</sub>H<sub>15</sub>N<sub>3</sub>OSNa [M+Na]<sup>+</sup>: 332.0834, found: 332.0838.

### III. NMR spectra copies

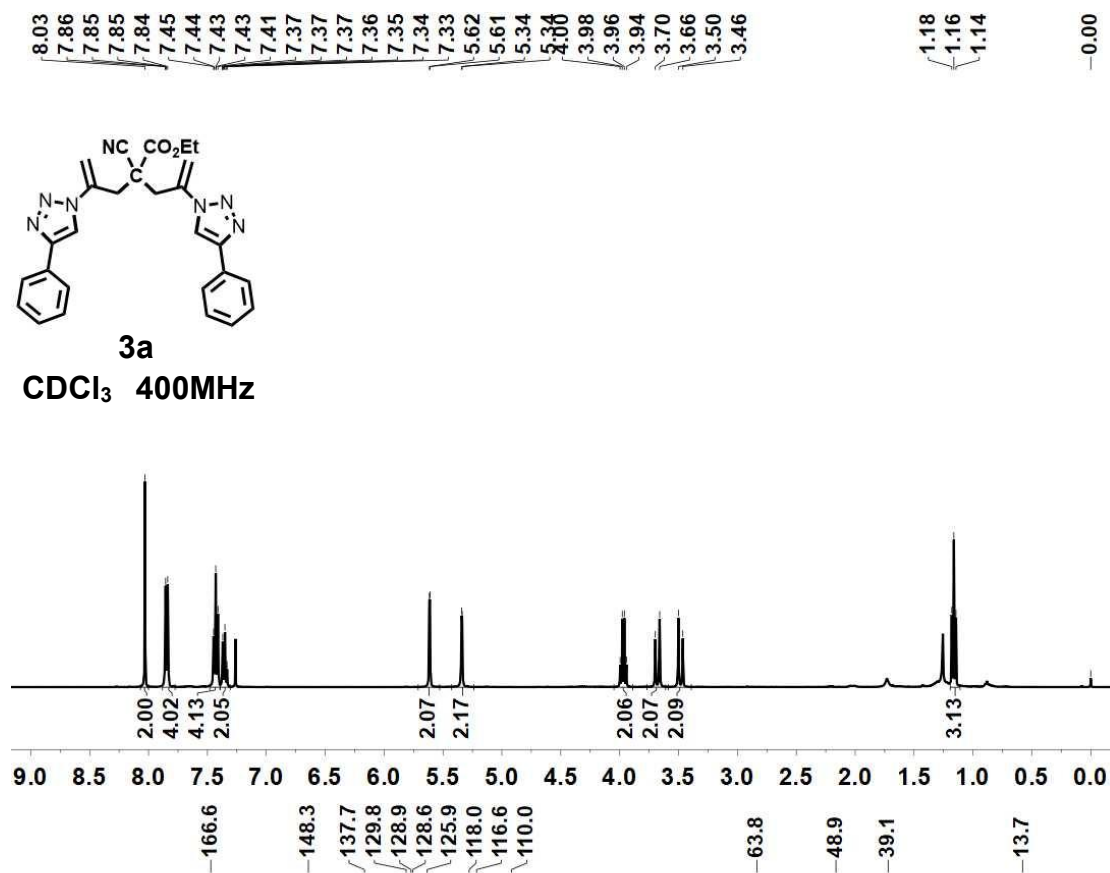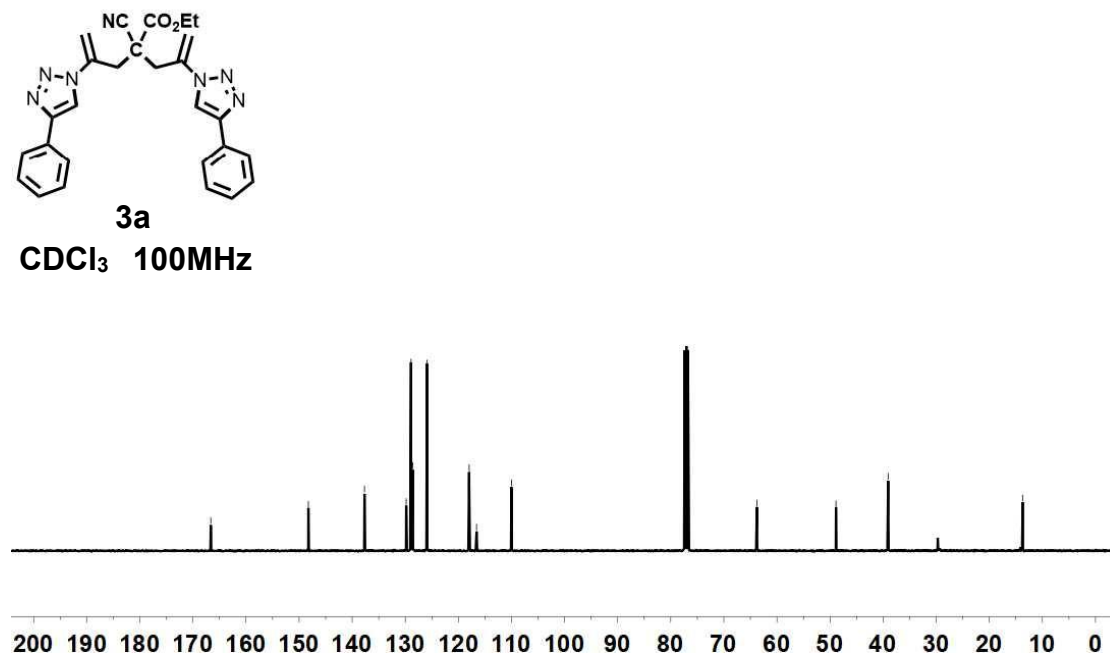

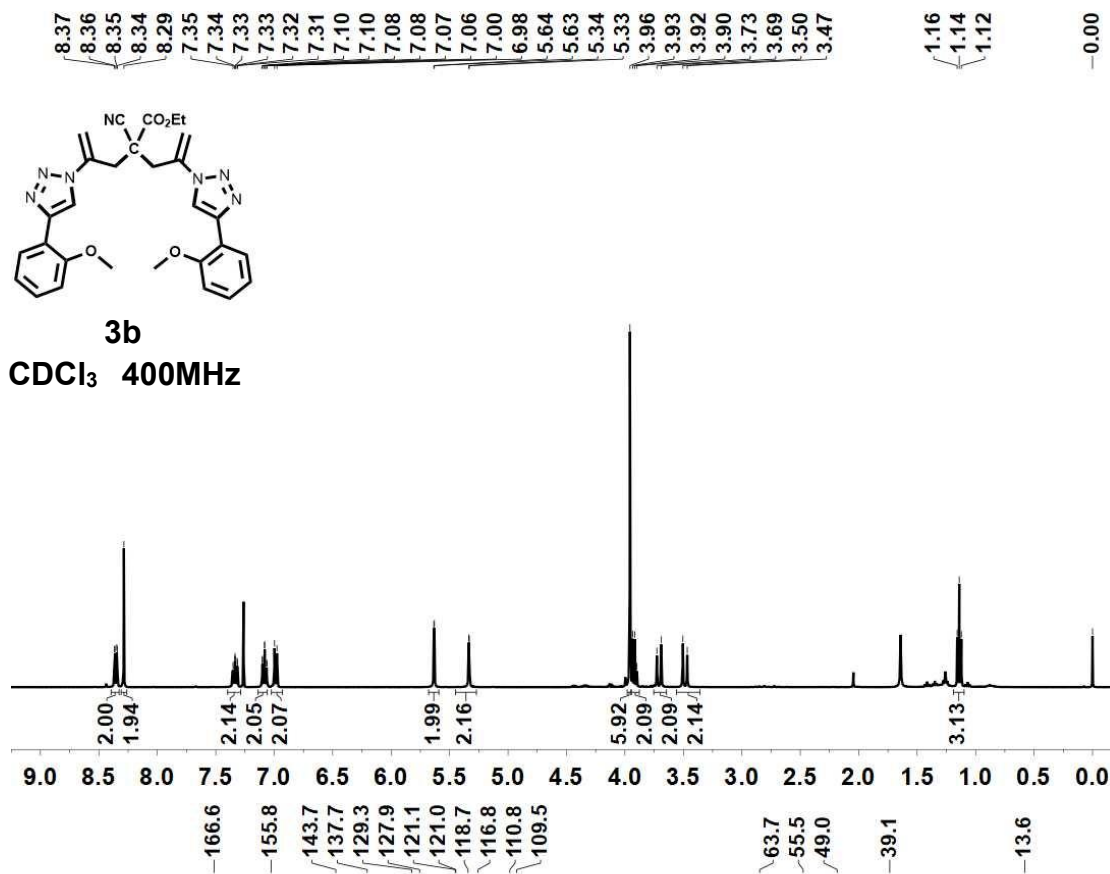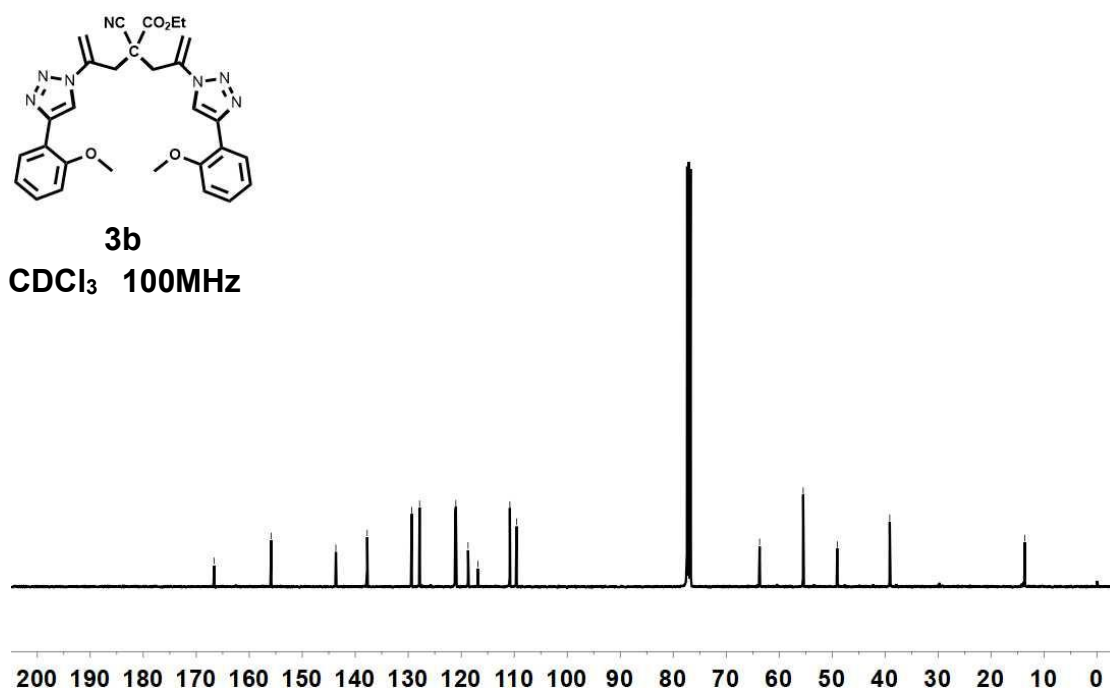

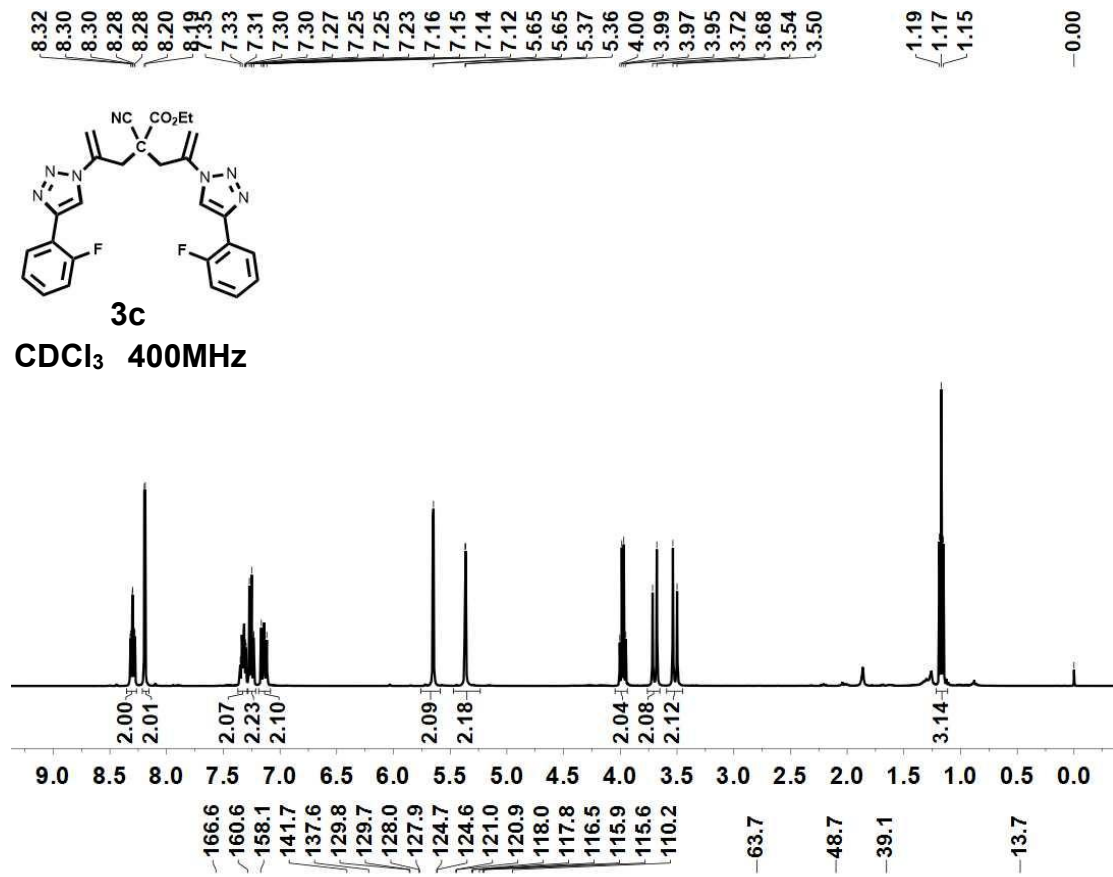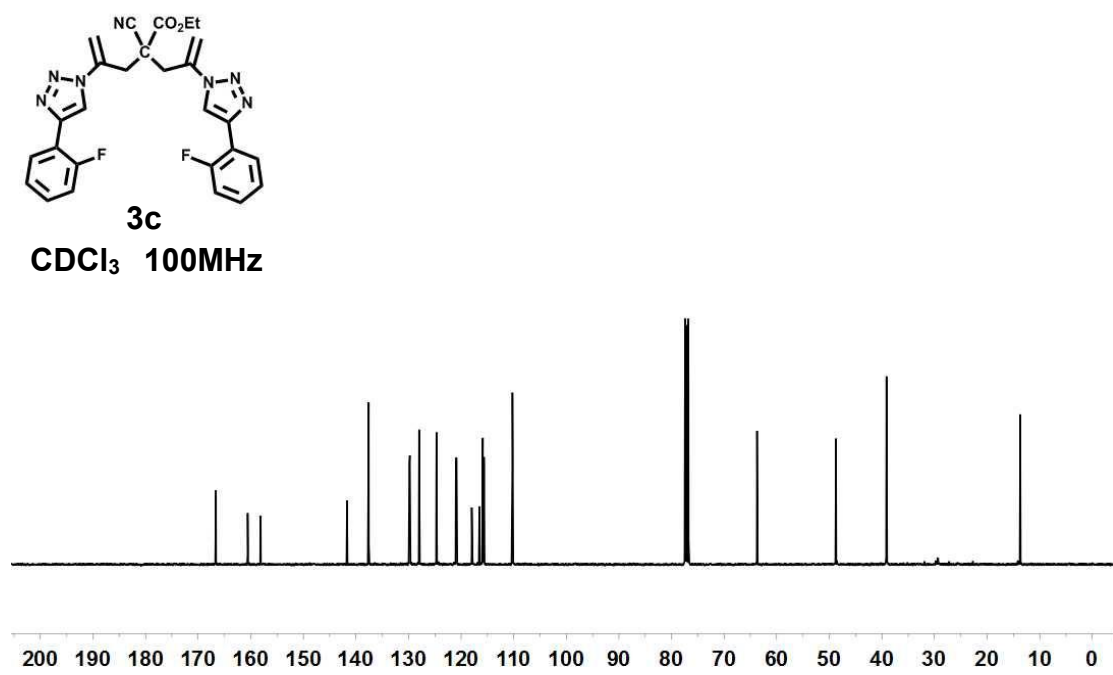

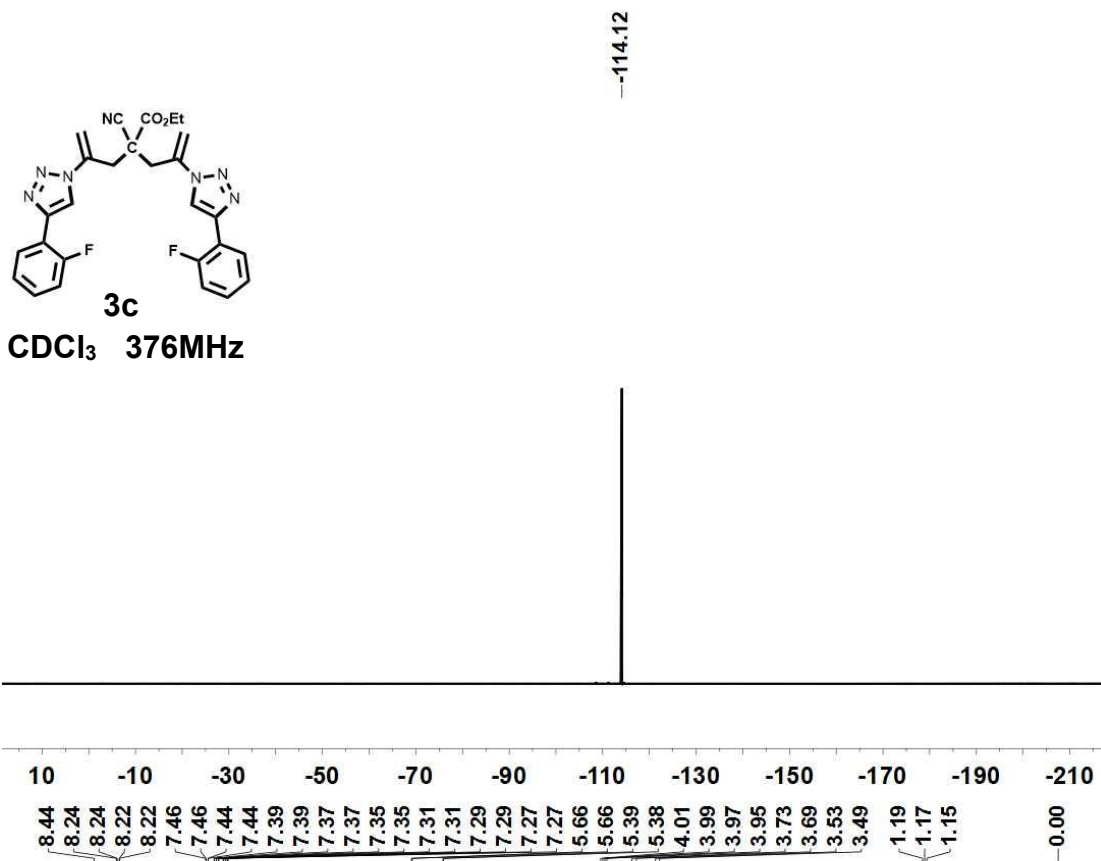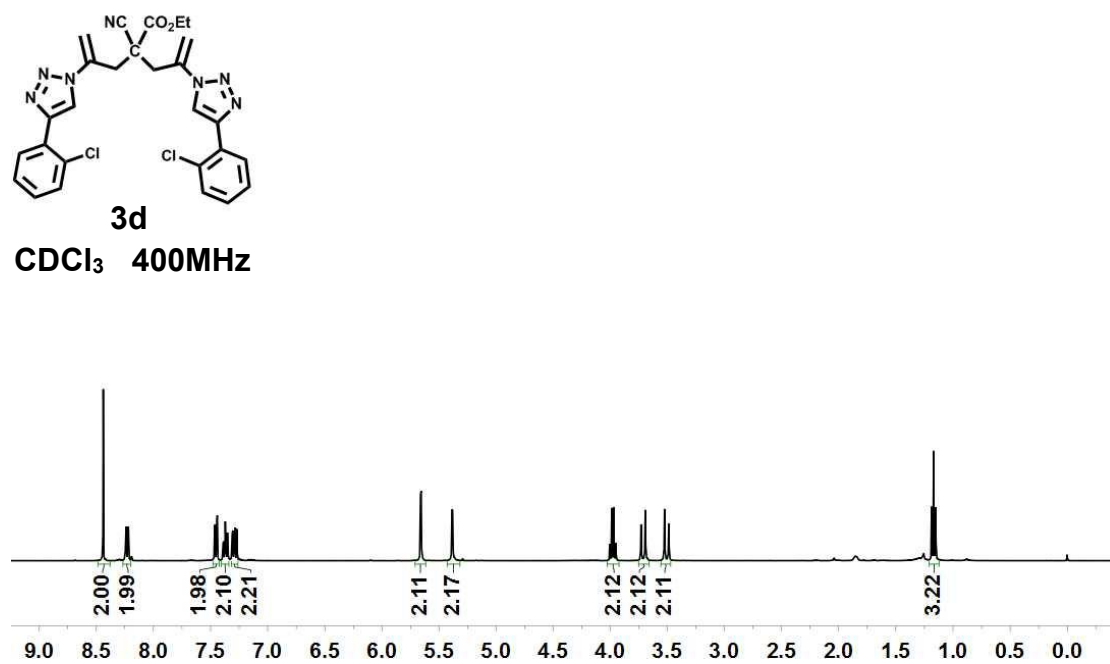



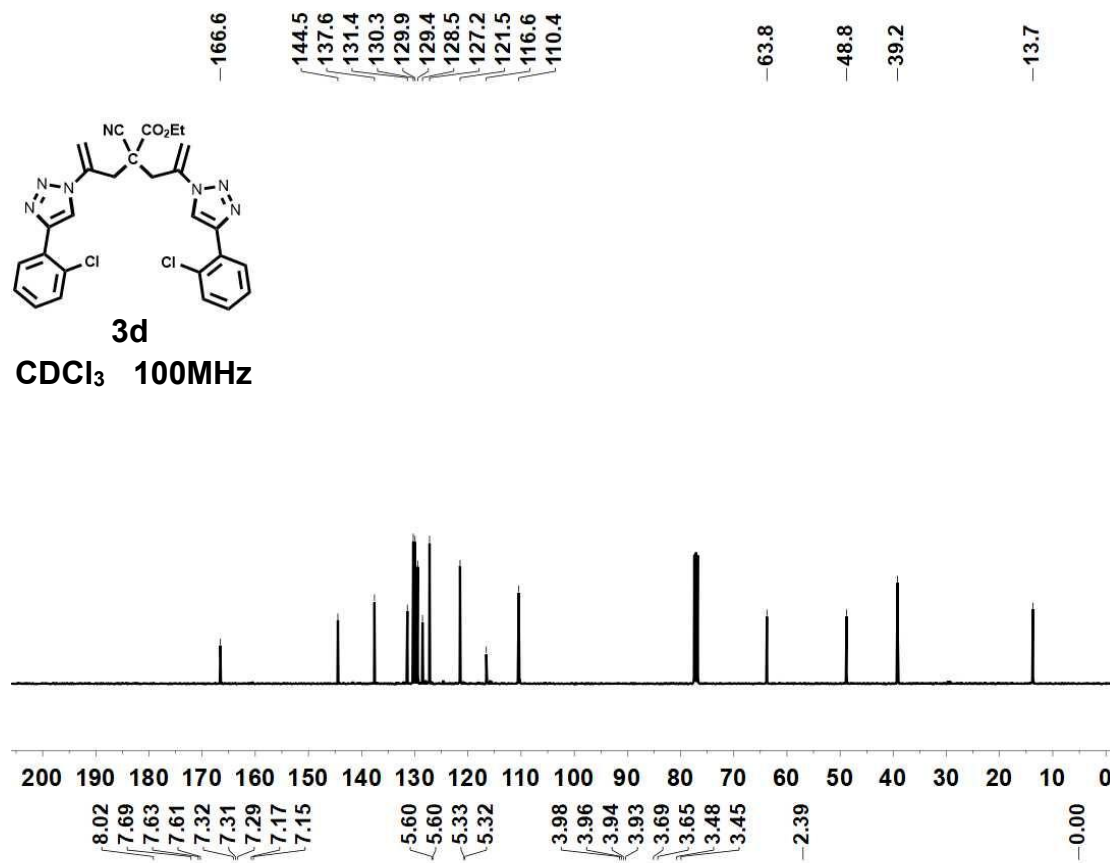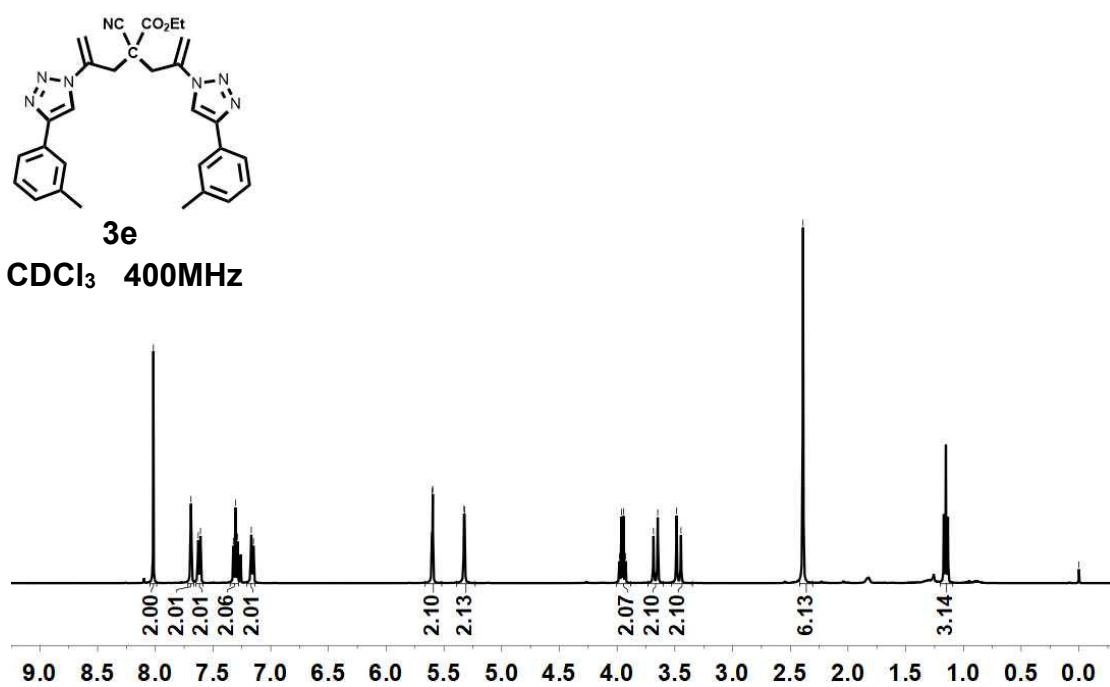

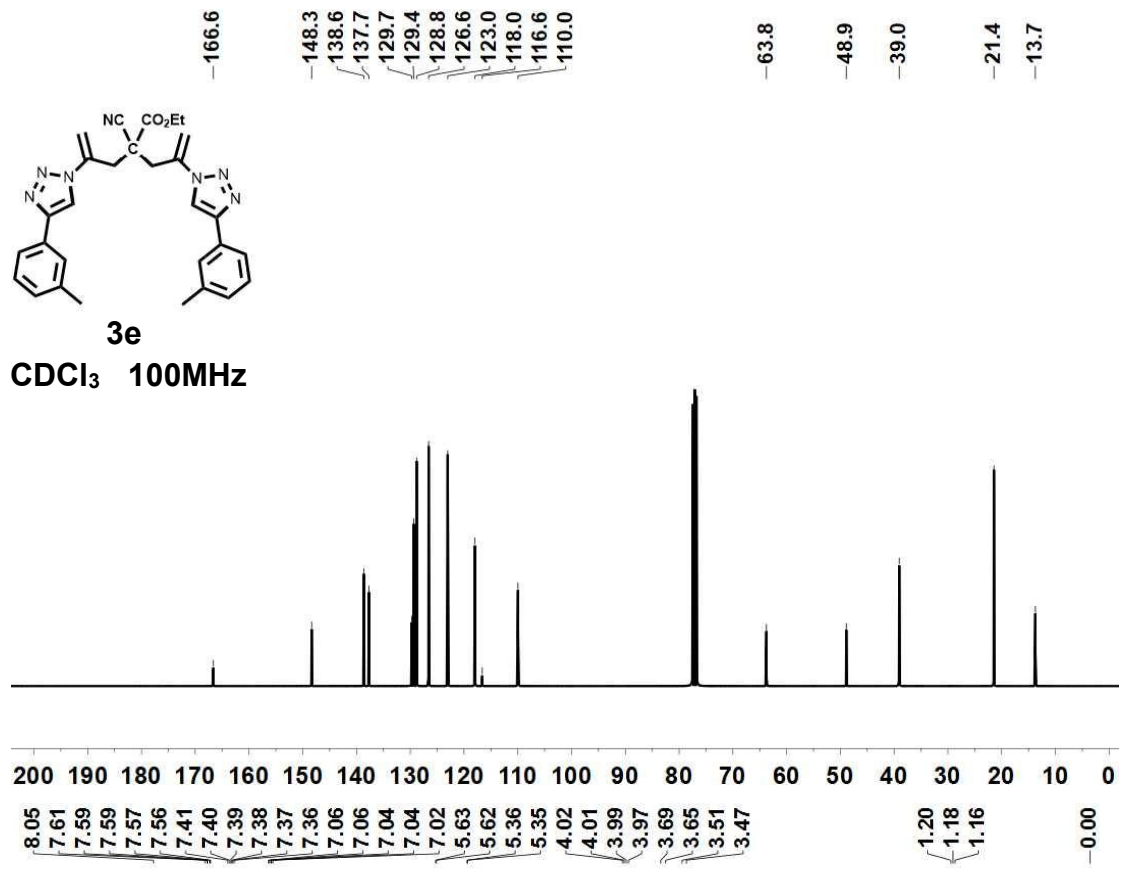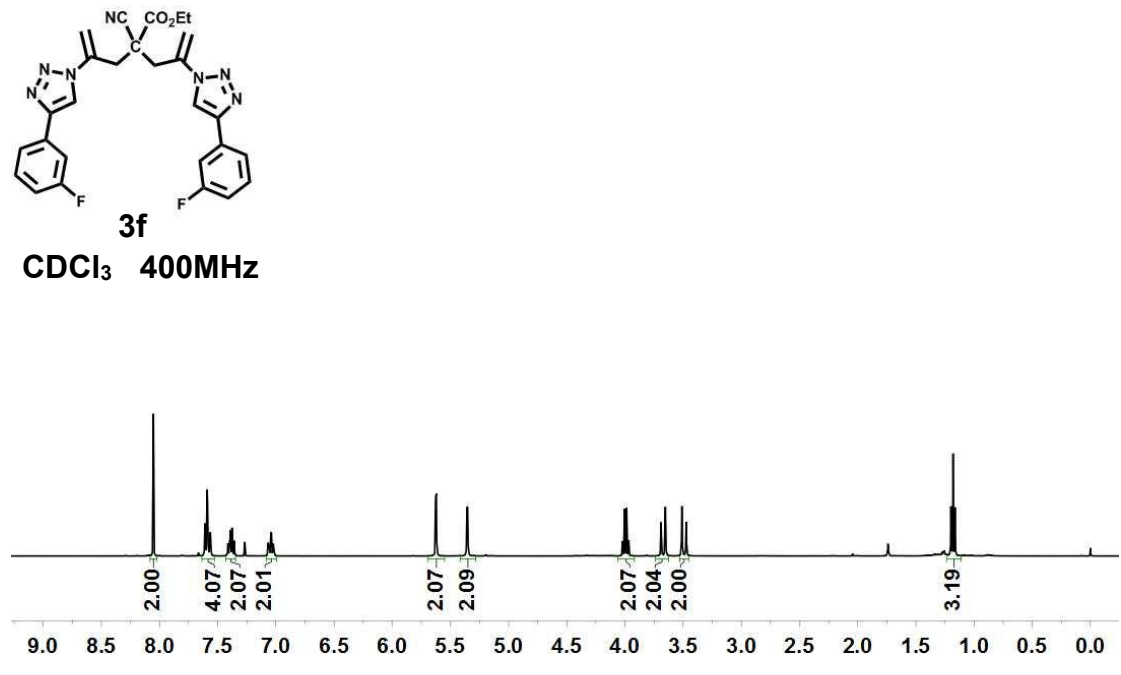

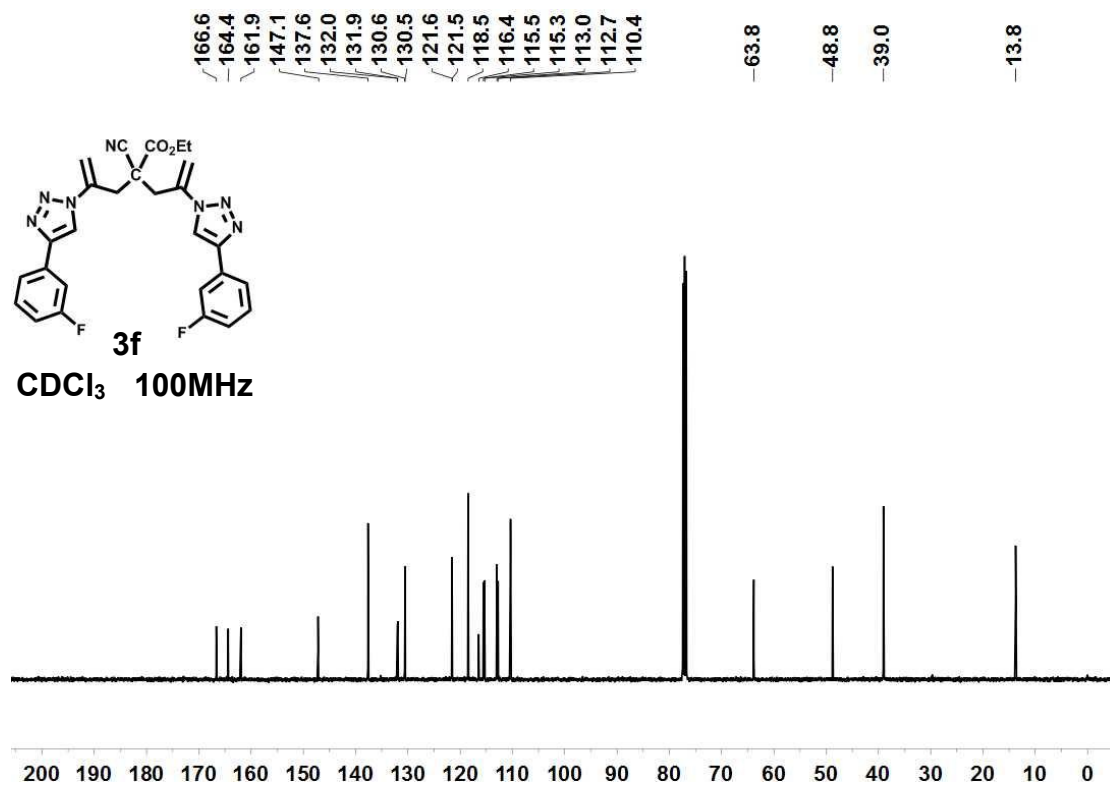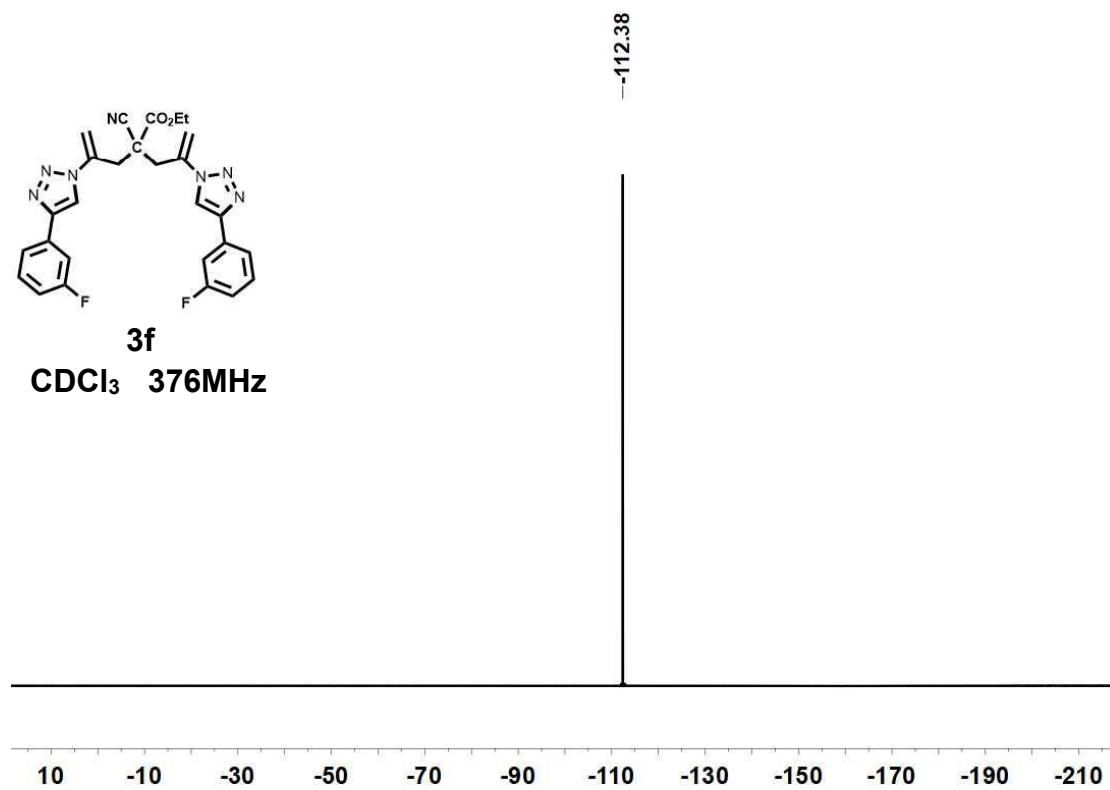

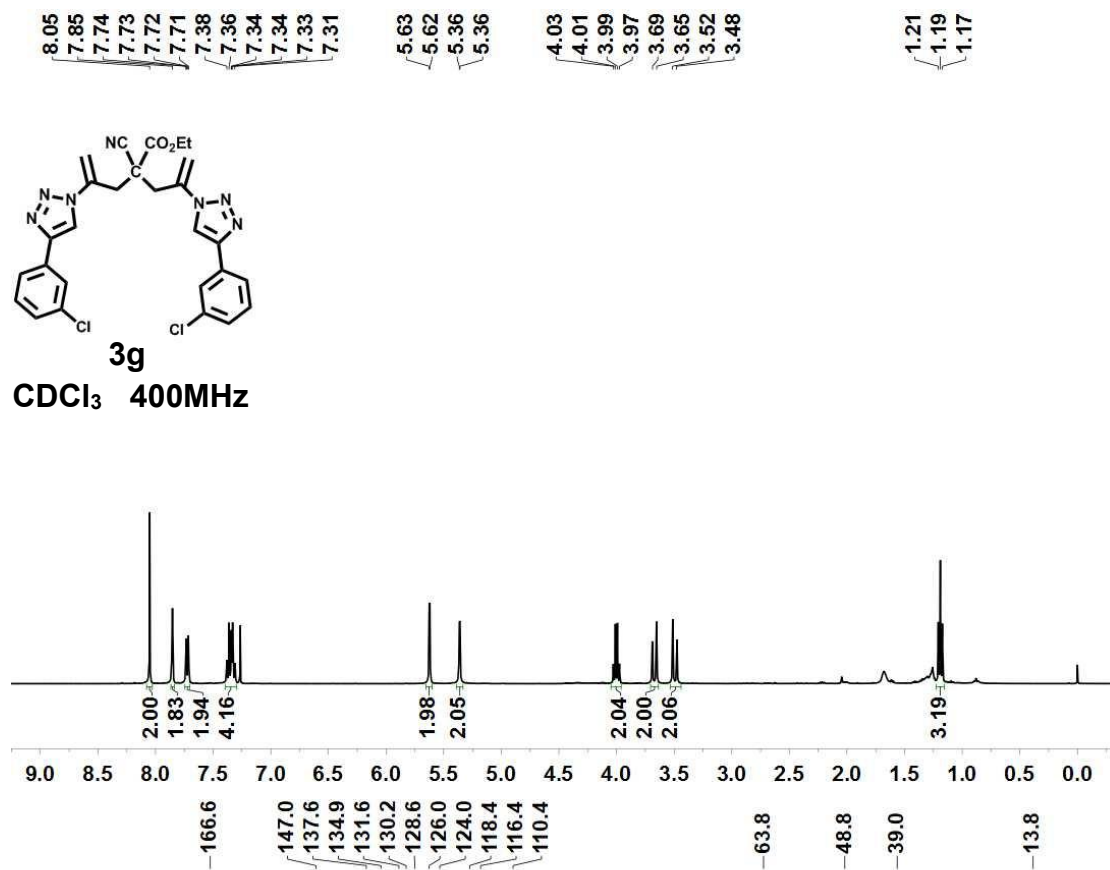

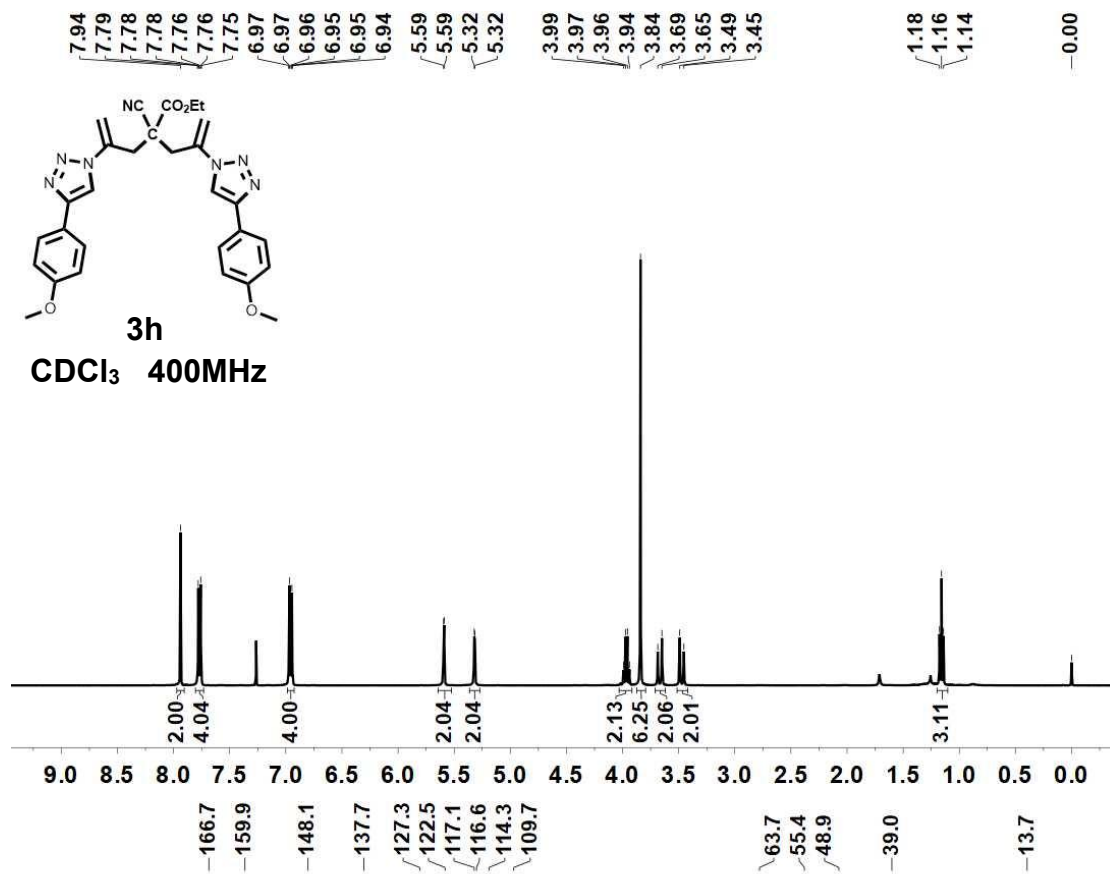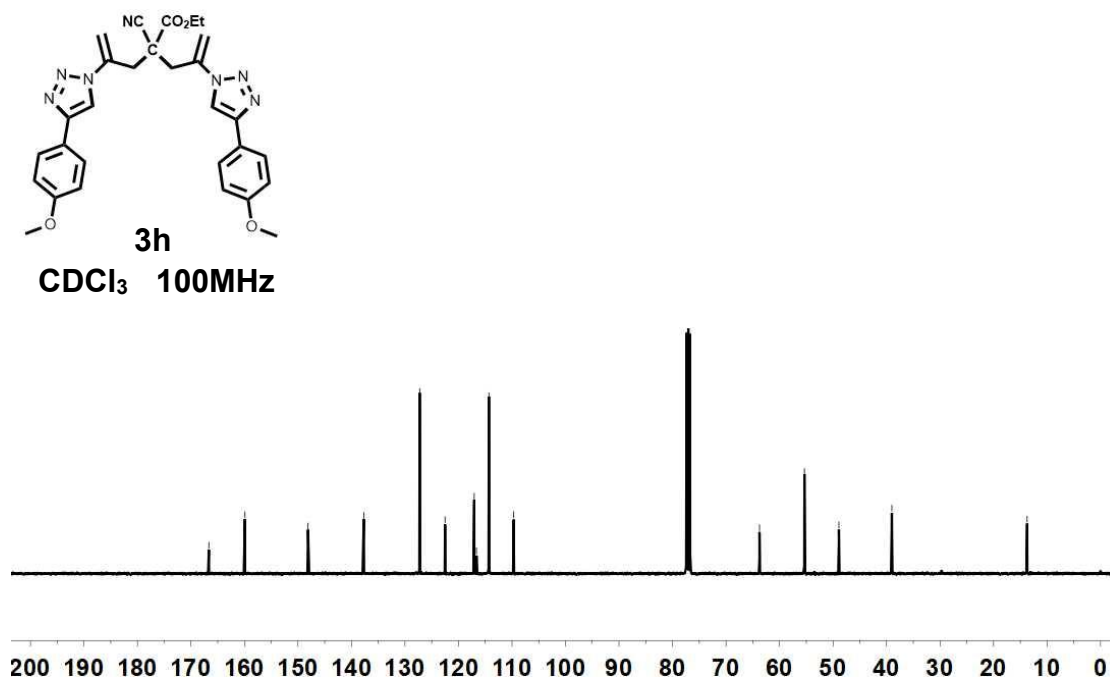

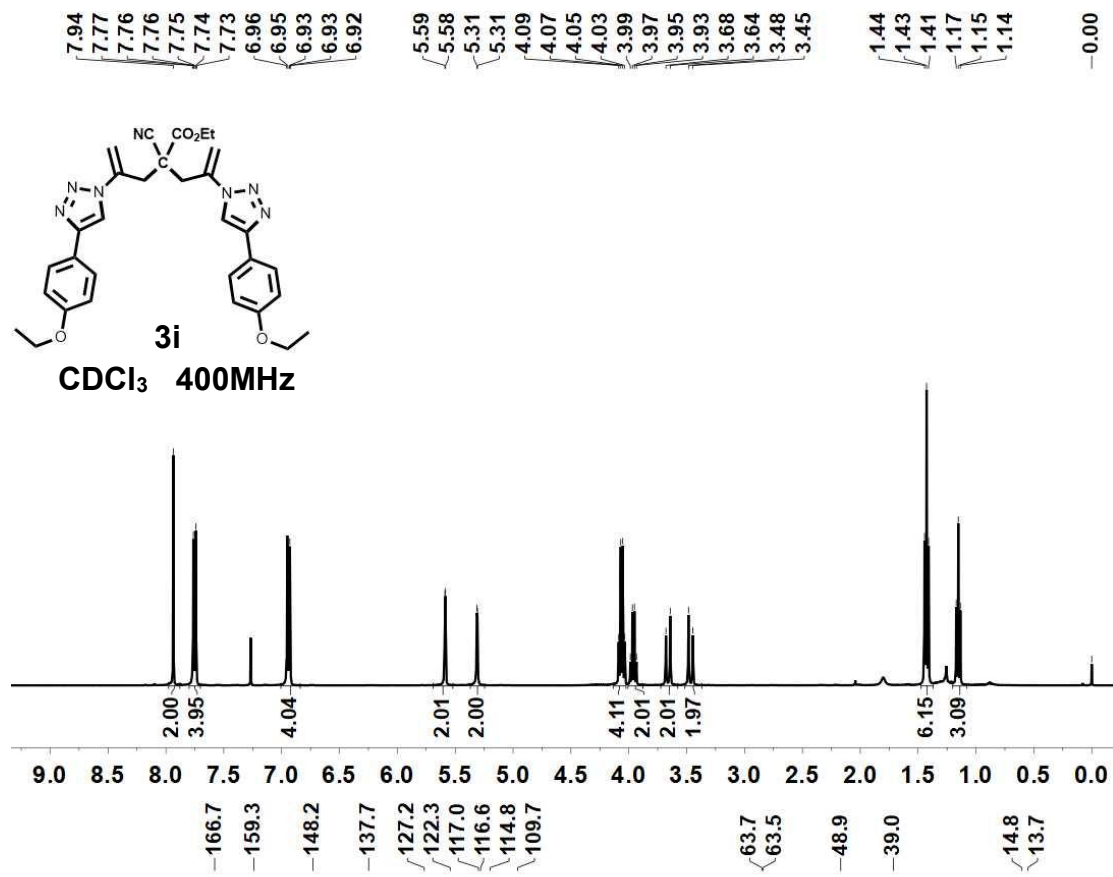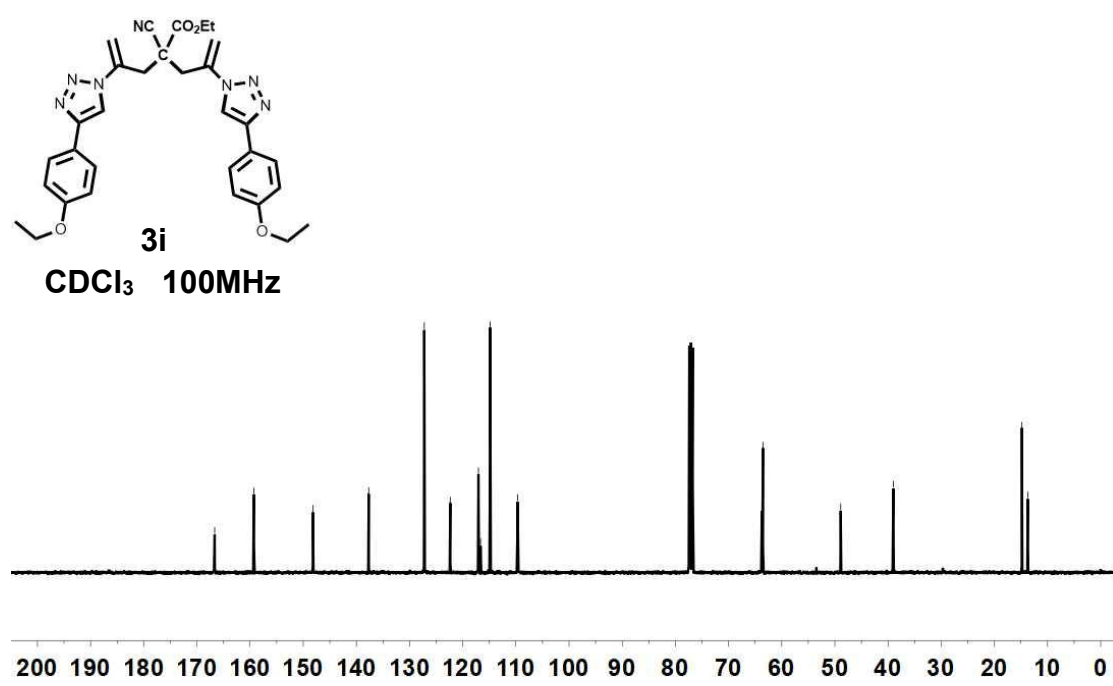

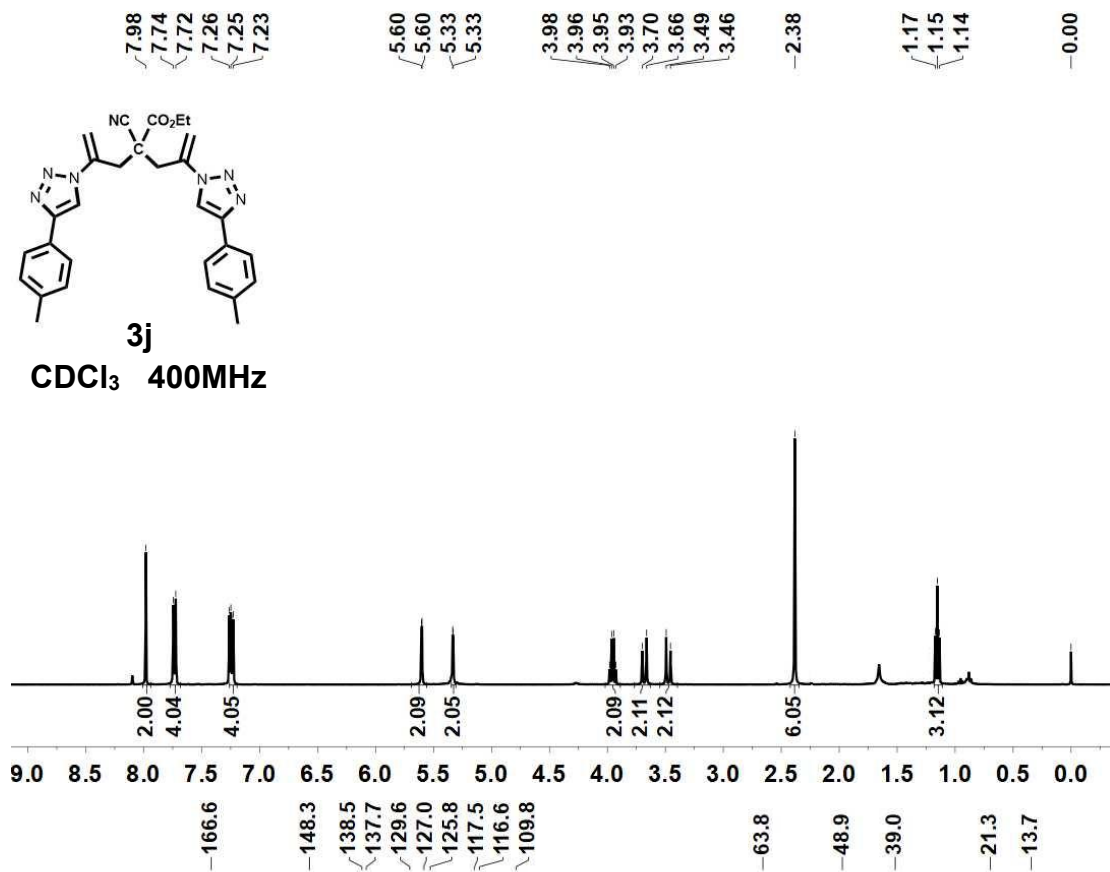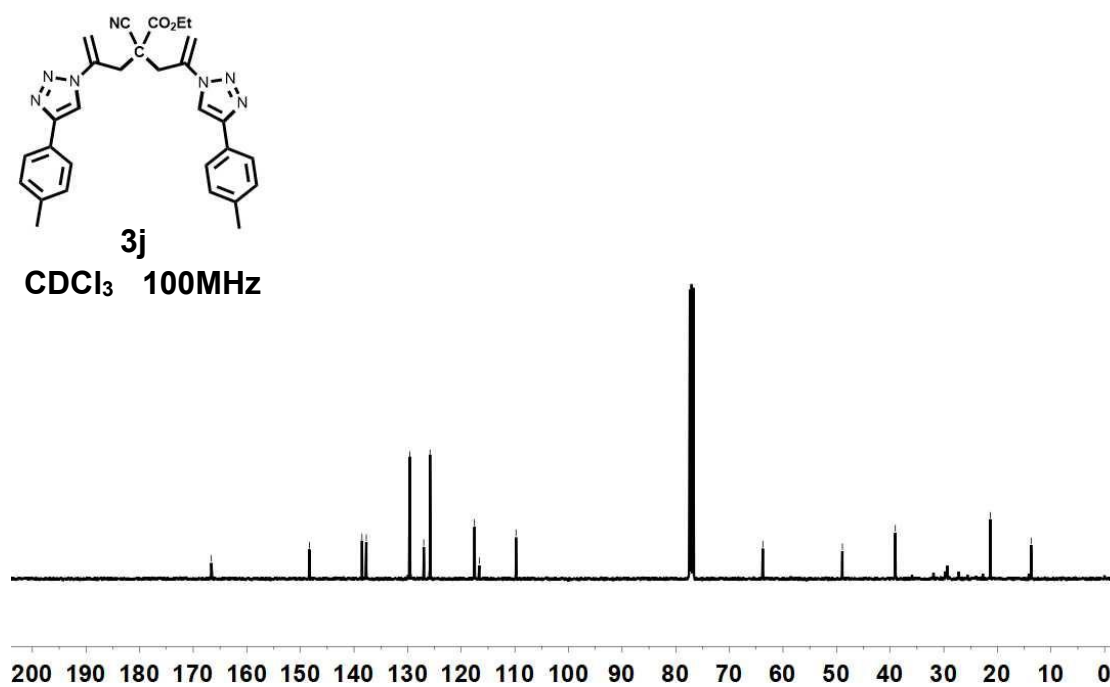

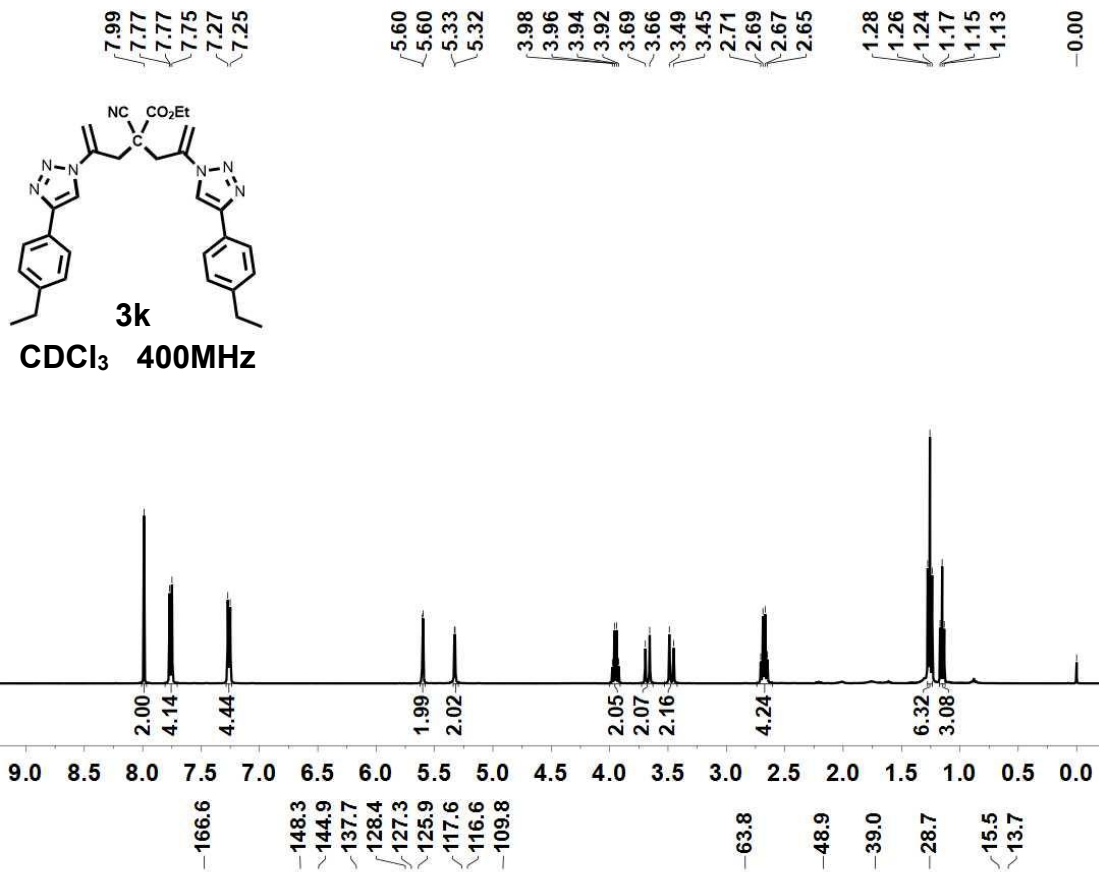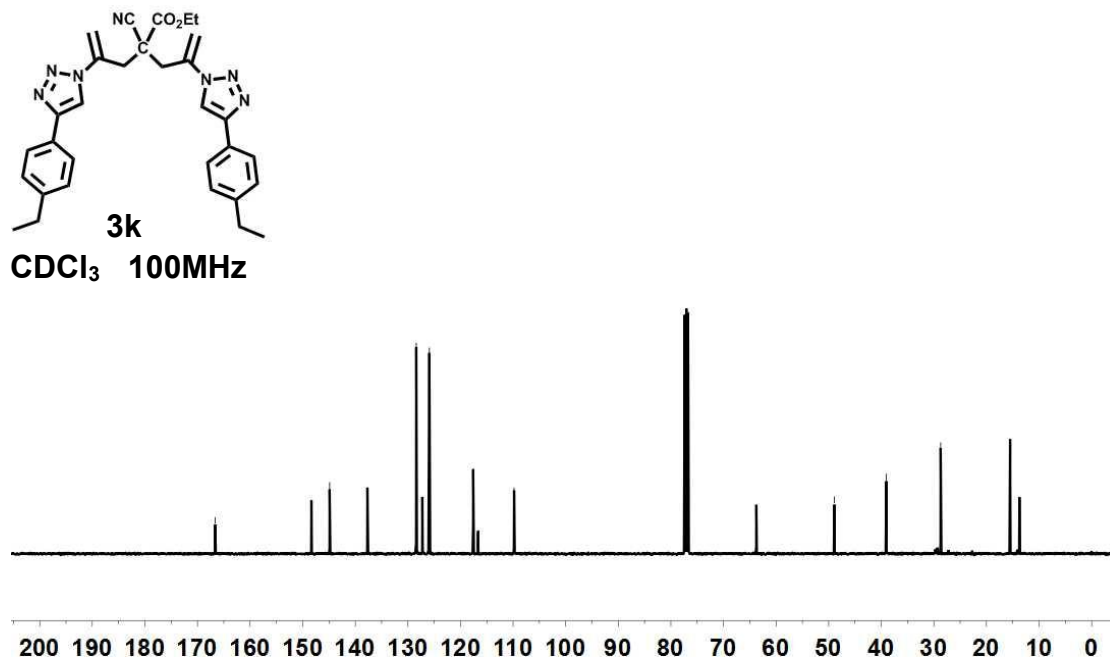



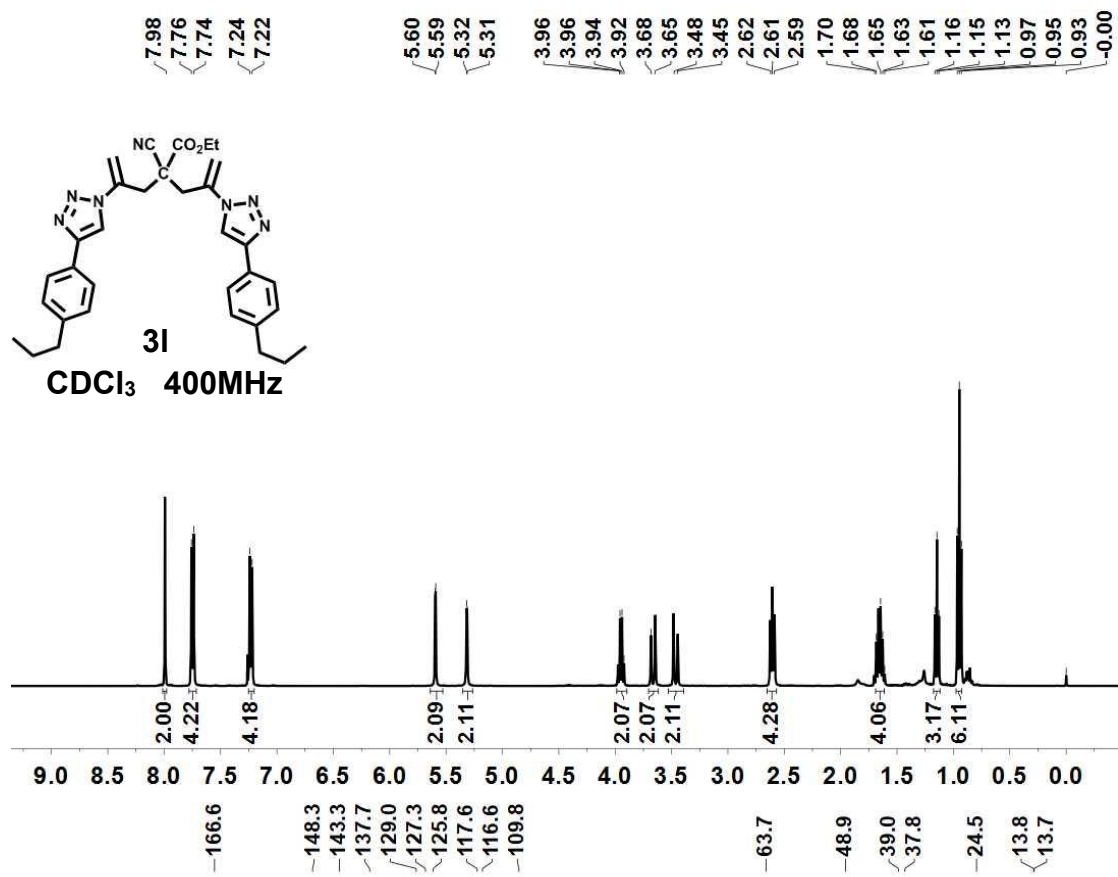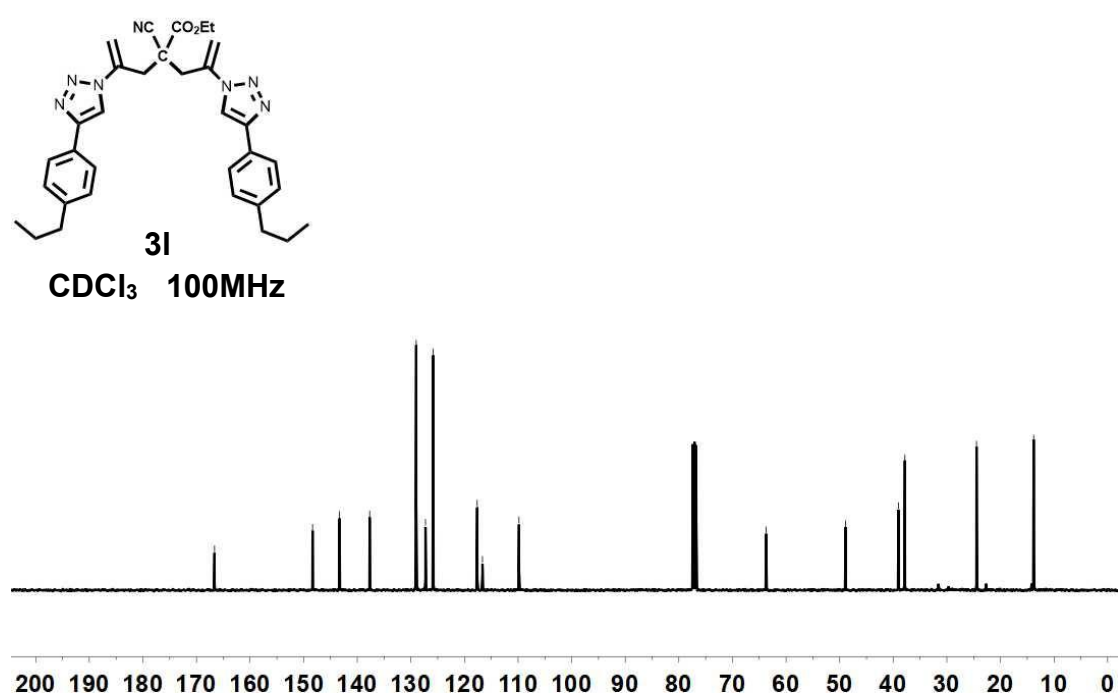

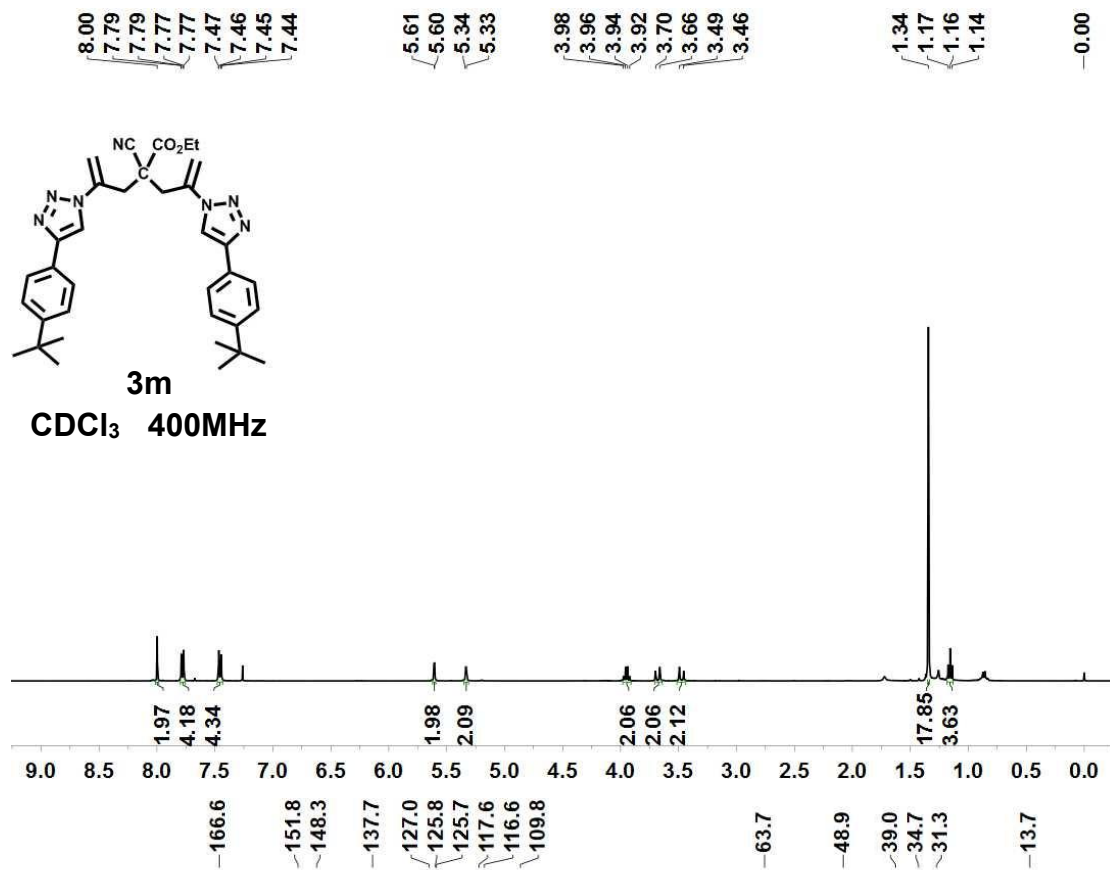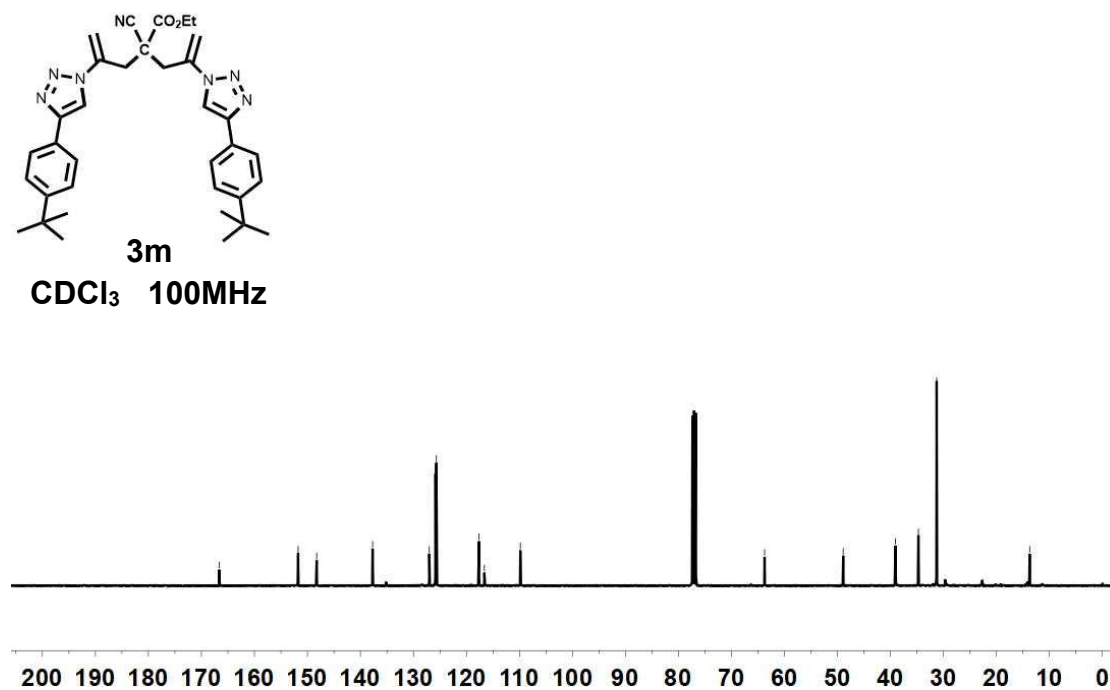

8.06 7.94 7.92 7.68 7.66 7.64 7.64 7.62 7.47 7.47 7.45 7.43 7.38 7.36 7.35 5.64 5.64 5.37 5.37 4.03 4.01 4.00 3.98 3.72 3.69 3.53 3.49 1.21 1.19 1.18 -0.00

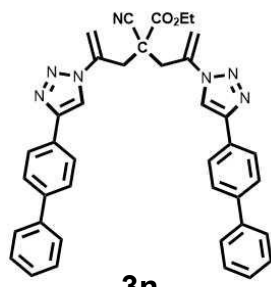

**CDCl<sub>3</sub> 400MHz**

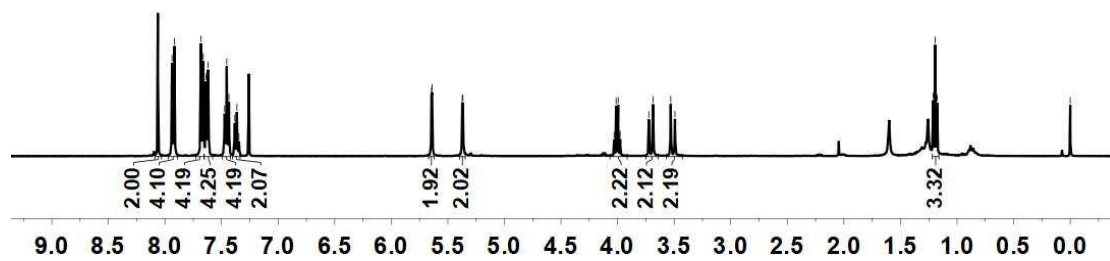

9.0 8.5 8.0 7.5 7.0 6.5 6.0 5.5 5.0 4.5 4.0 3.5 3.0 2.5 2.0 1.5 1.0 0.5 0.0

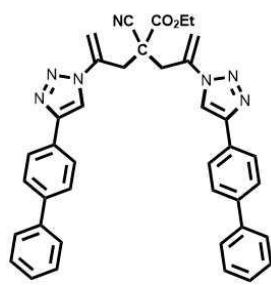

**CDCl<sub>3</sub> 100MHz**

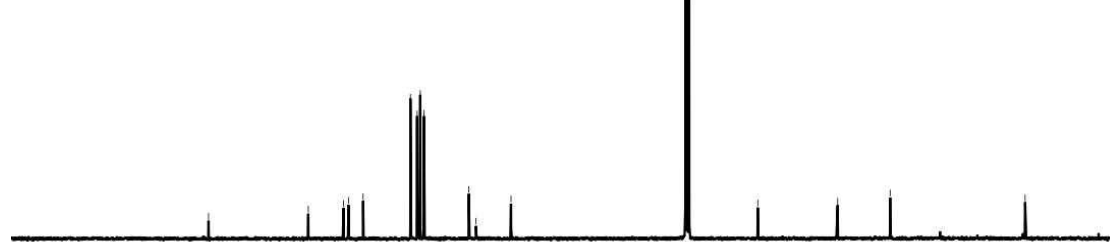

166.7 148.0 141.4 140.5 137.7 128.9 128.8 127.6 127.6 127.0 126.3 117.9 116.6 110.0 63.8 48.9 39.0 13.8

200 190 180 170 160 150 140 130 120 110 100 90 80 70 60 50 40 30 20 10 0

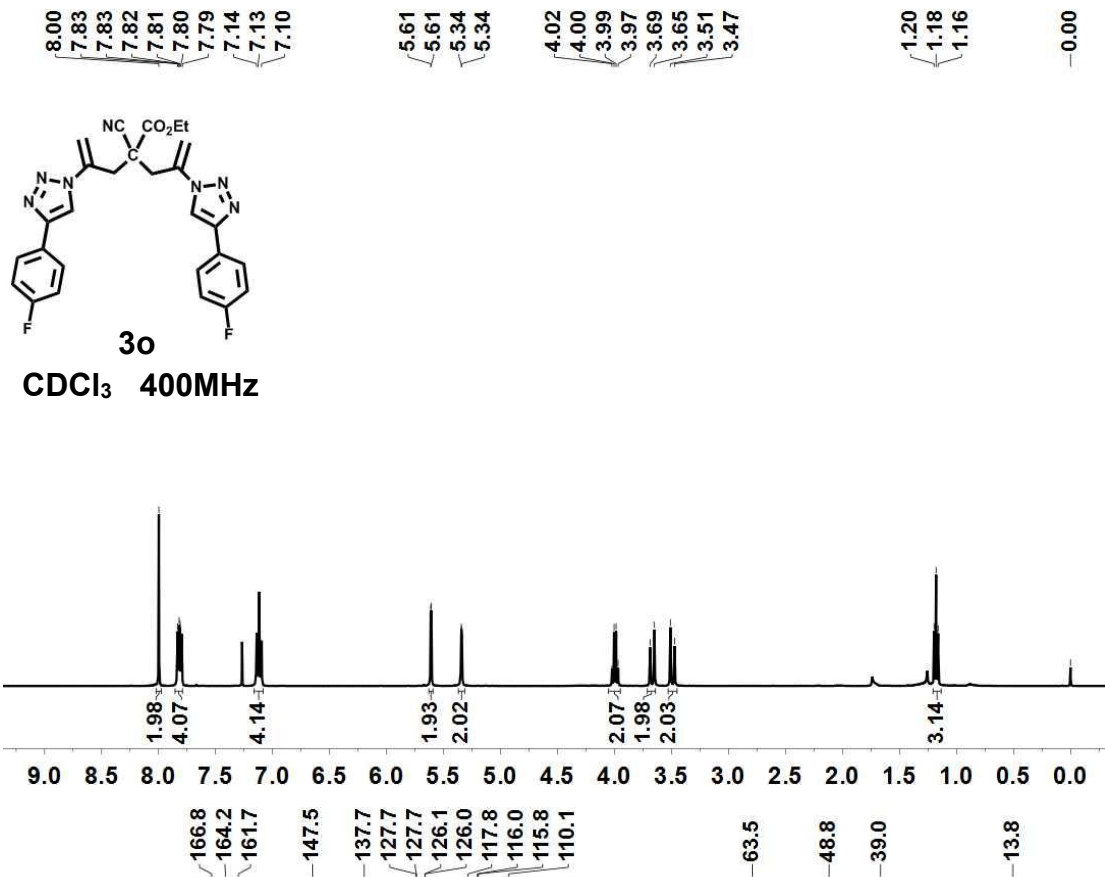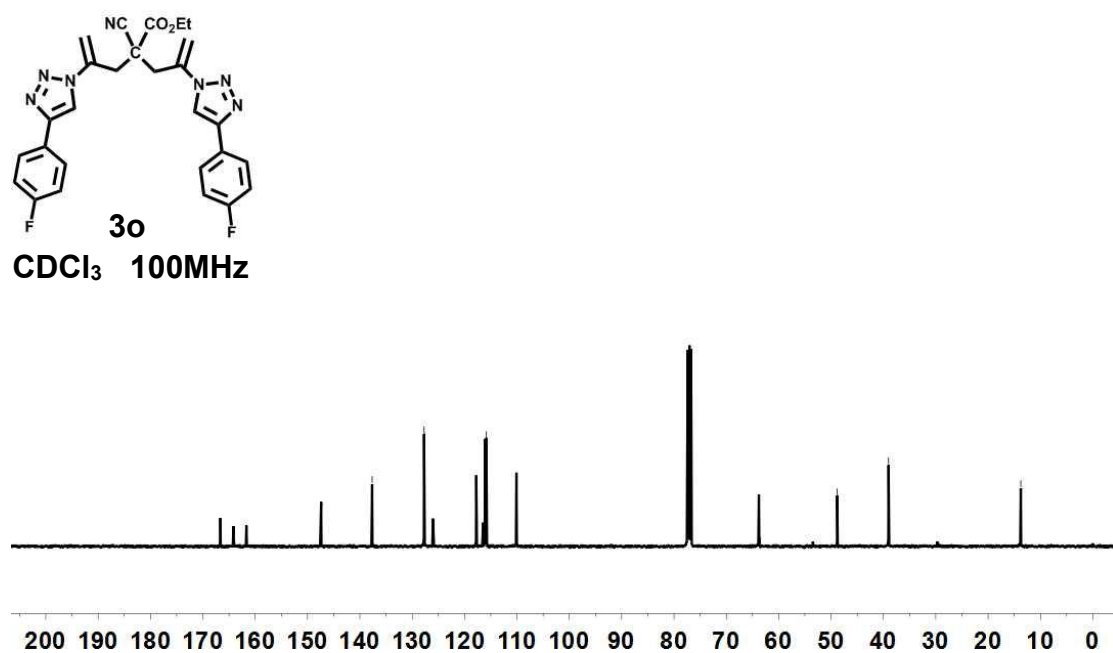

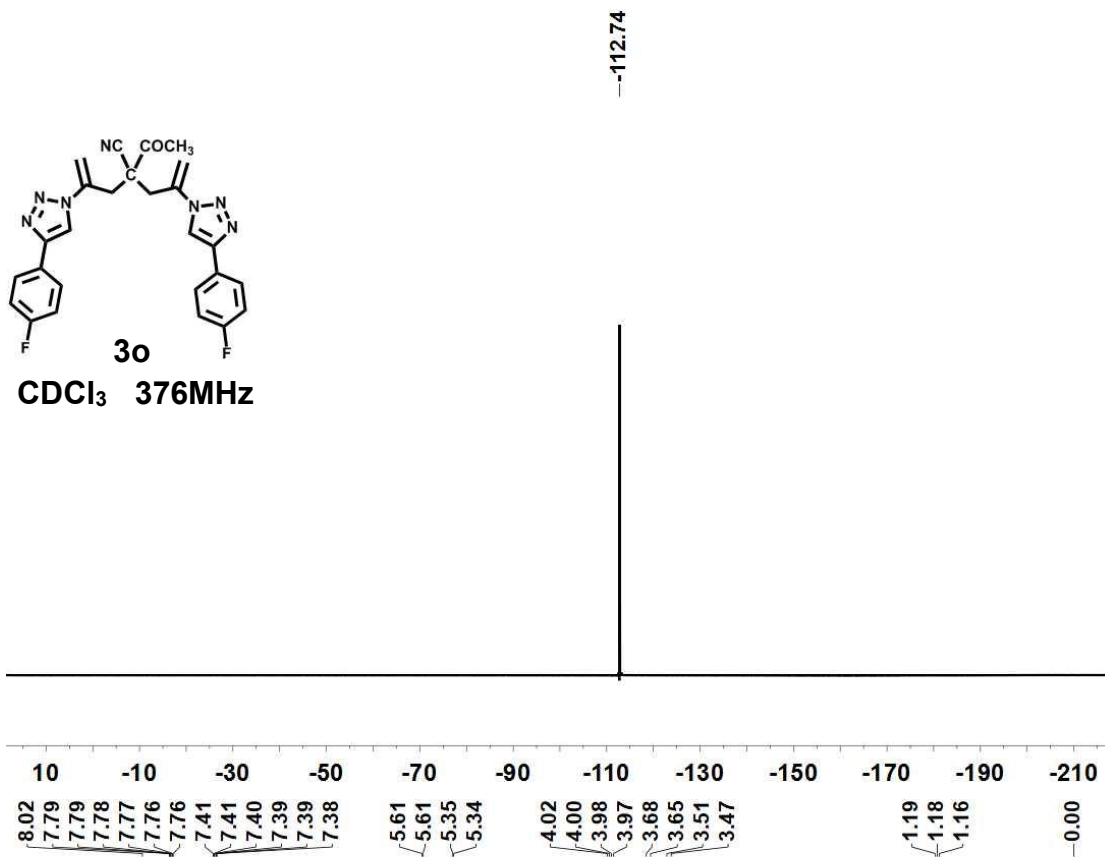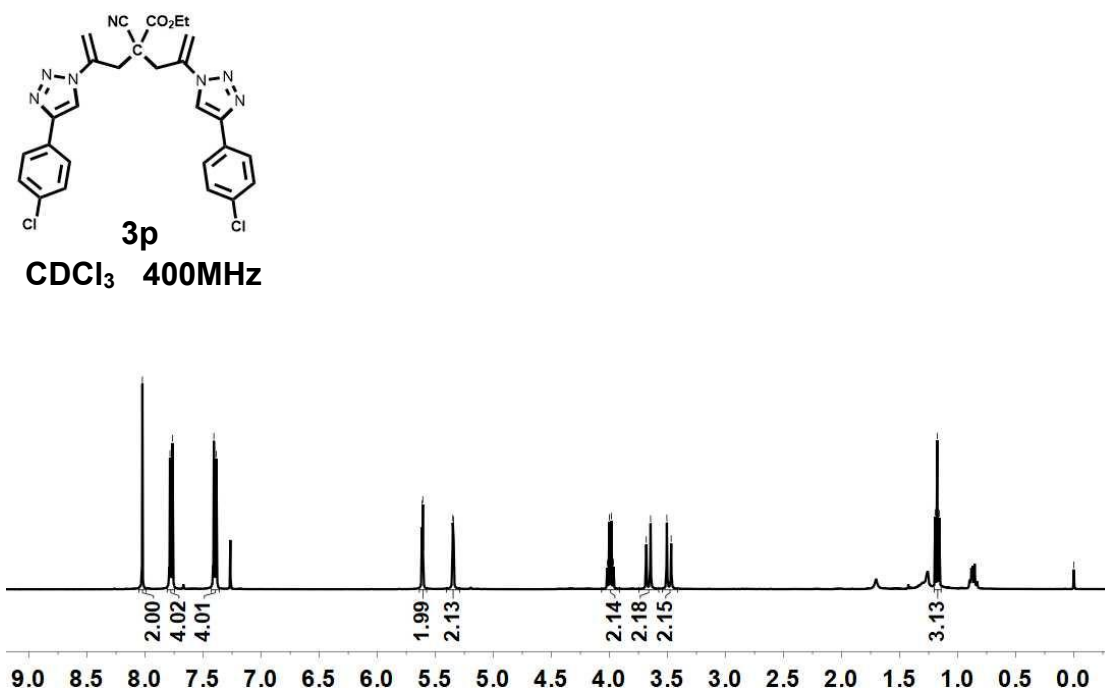

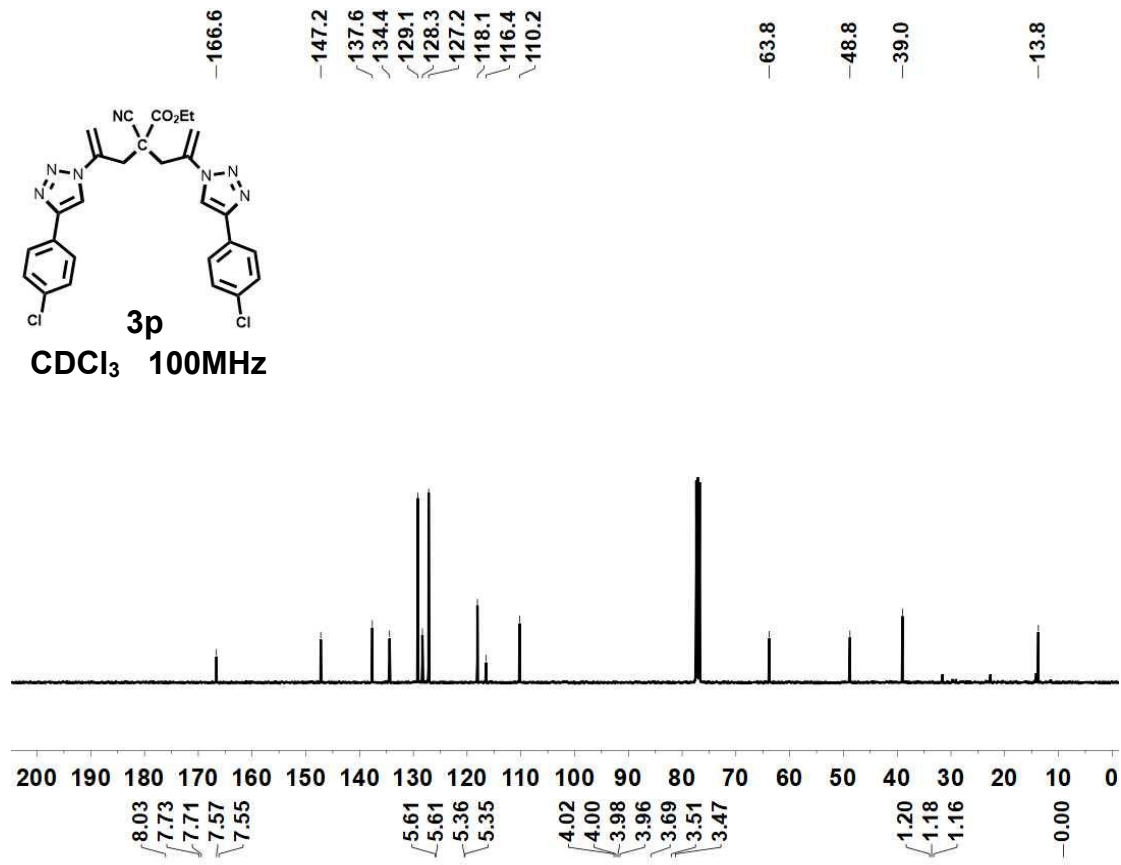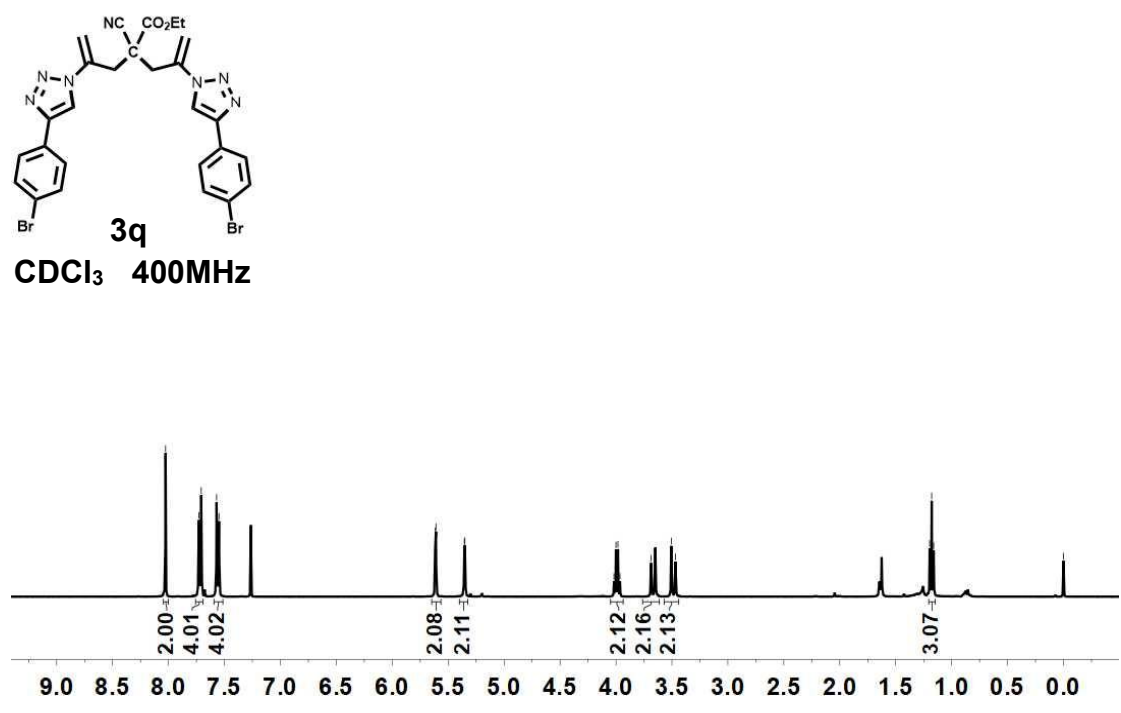

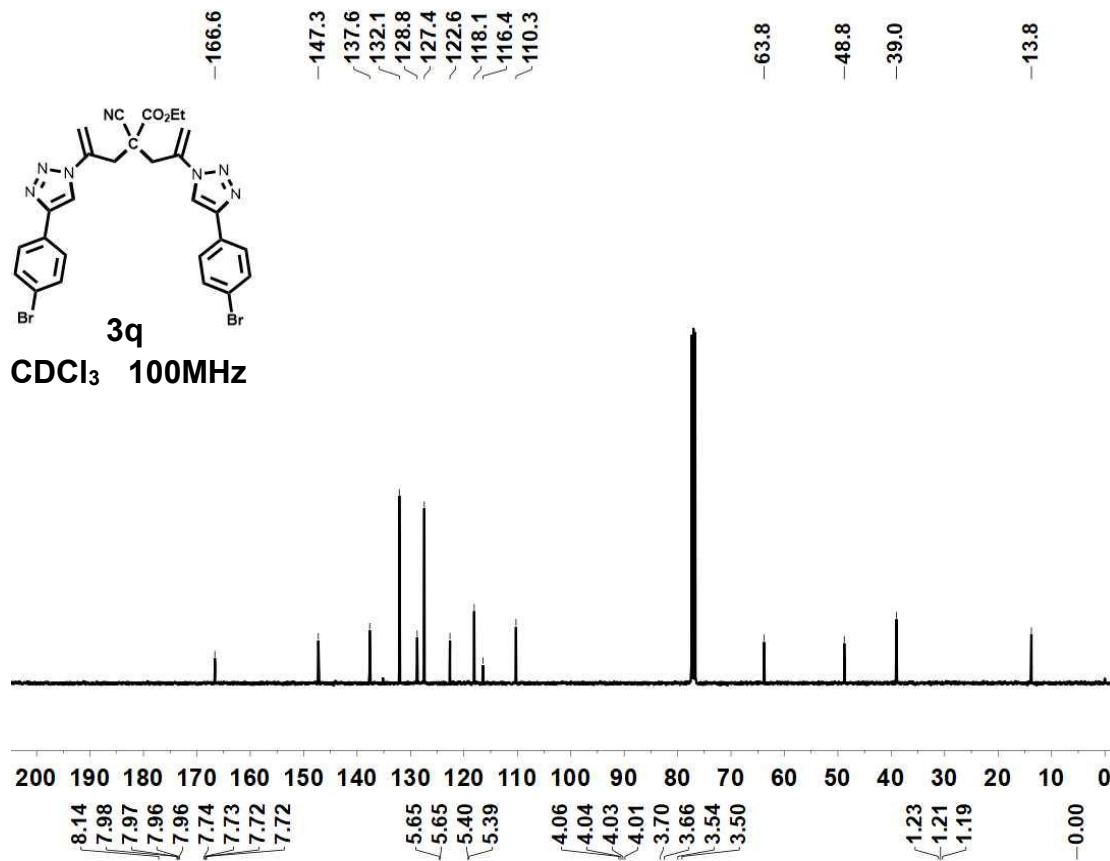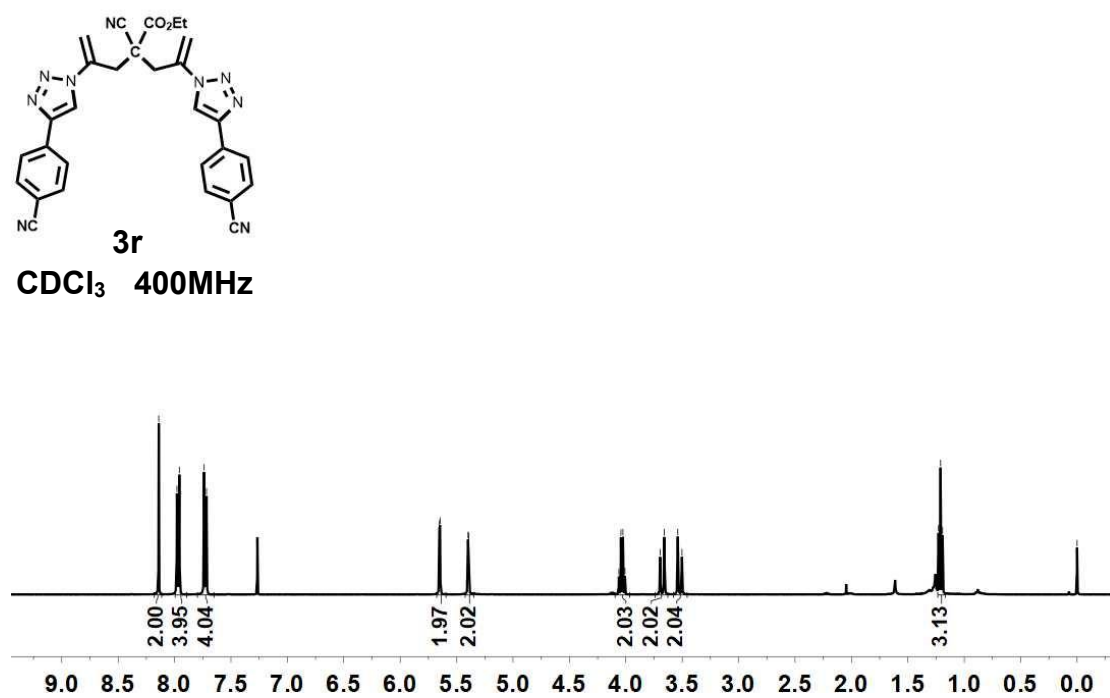

**3r**  
CDCl<sub>3</sub> 100MHz

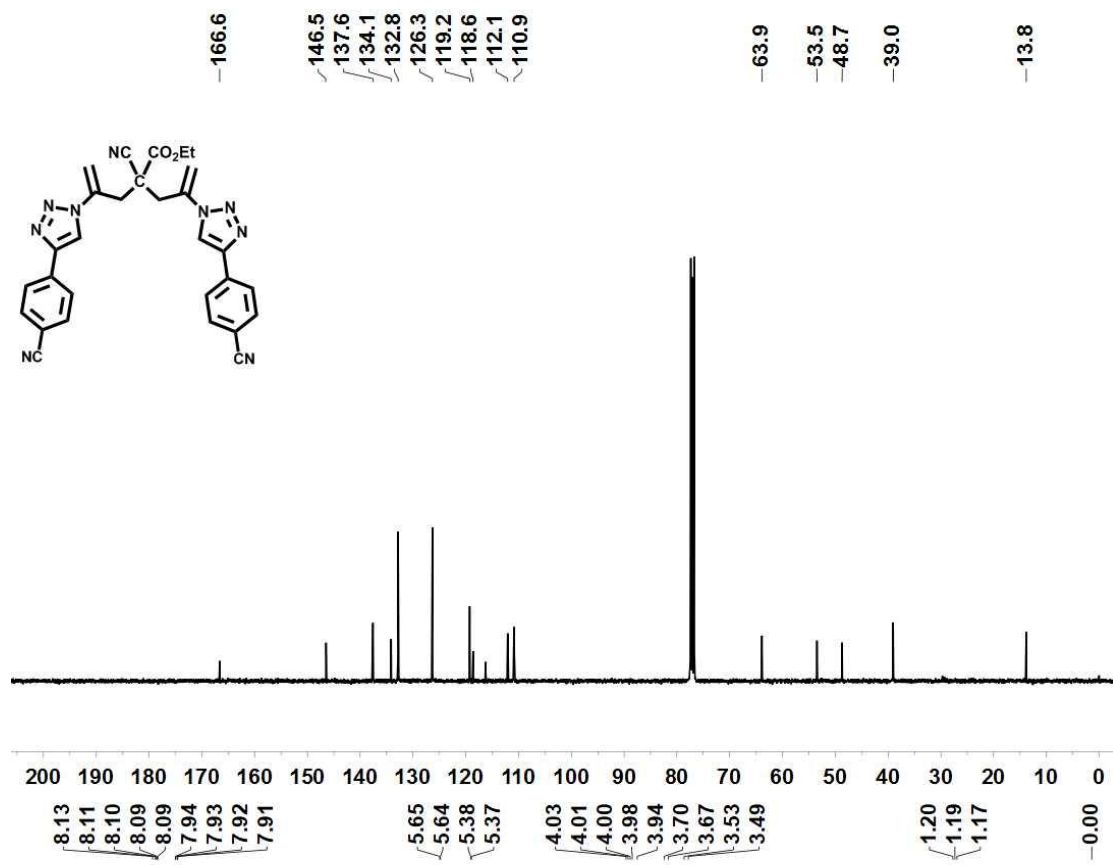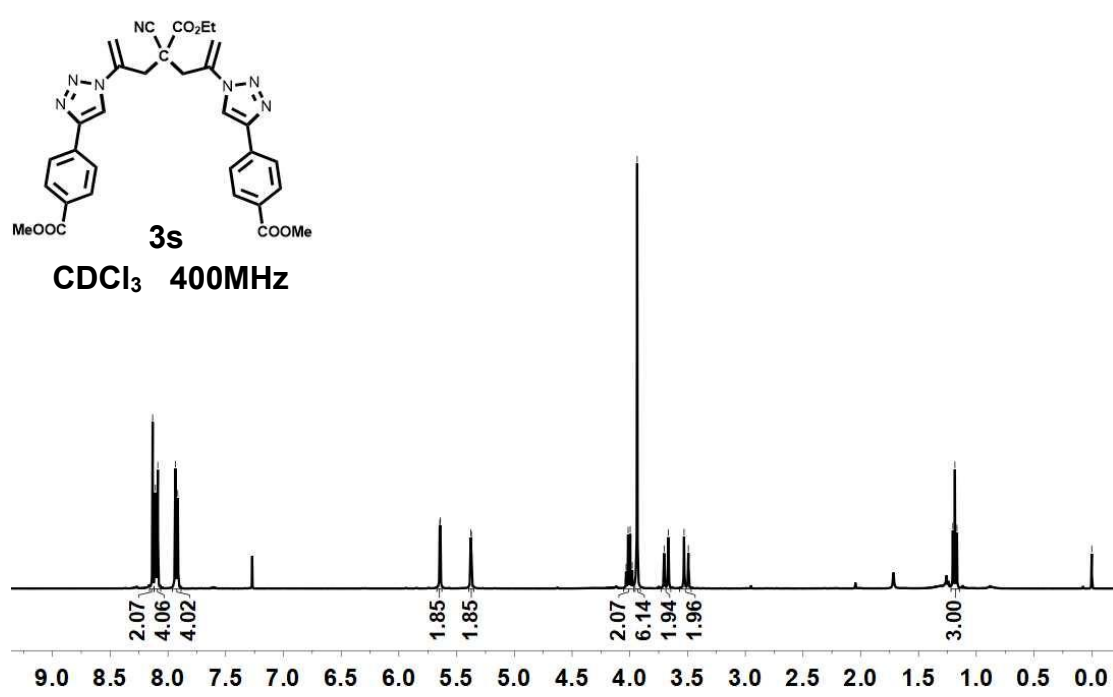



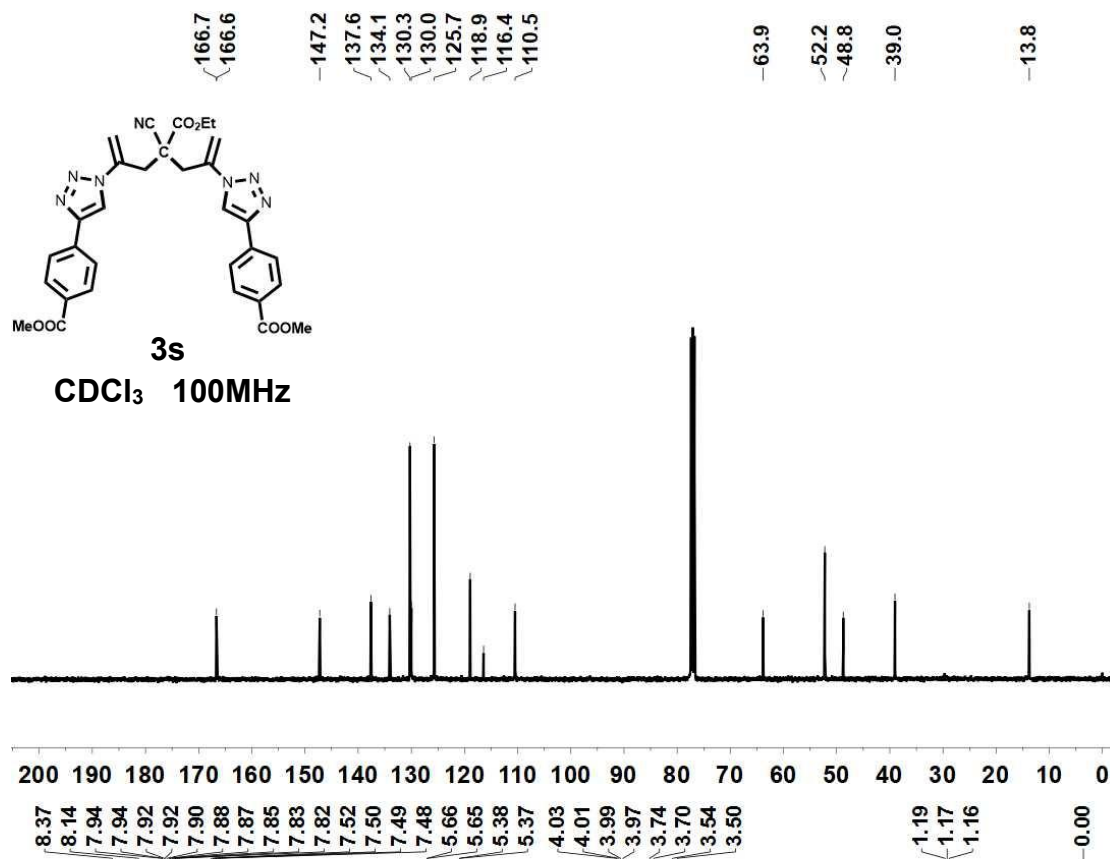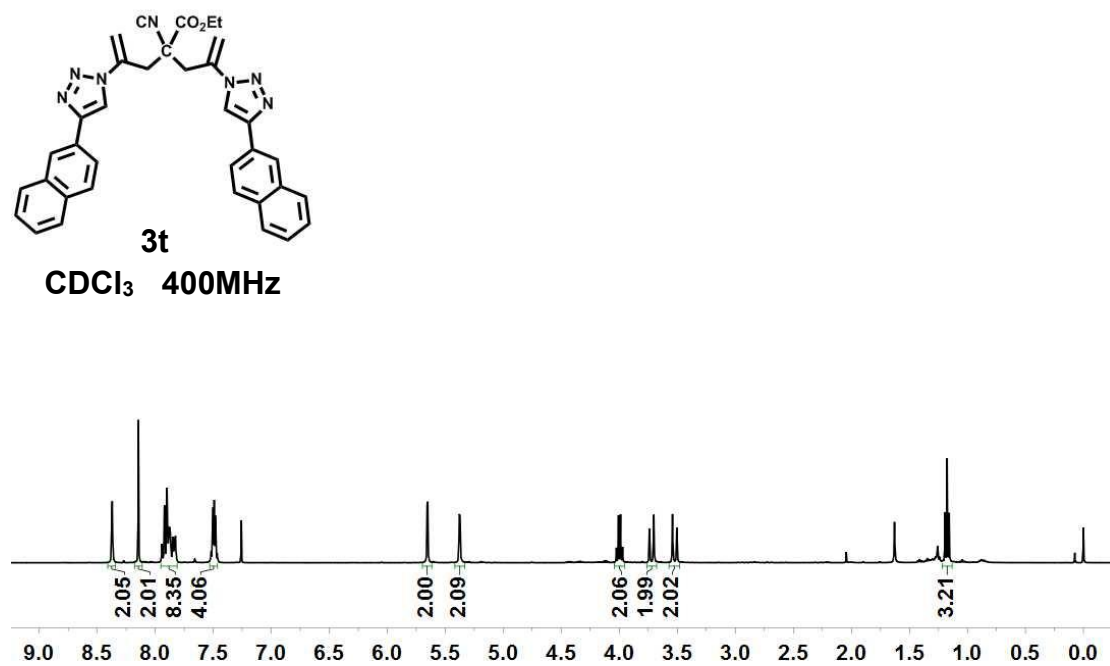

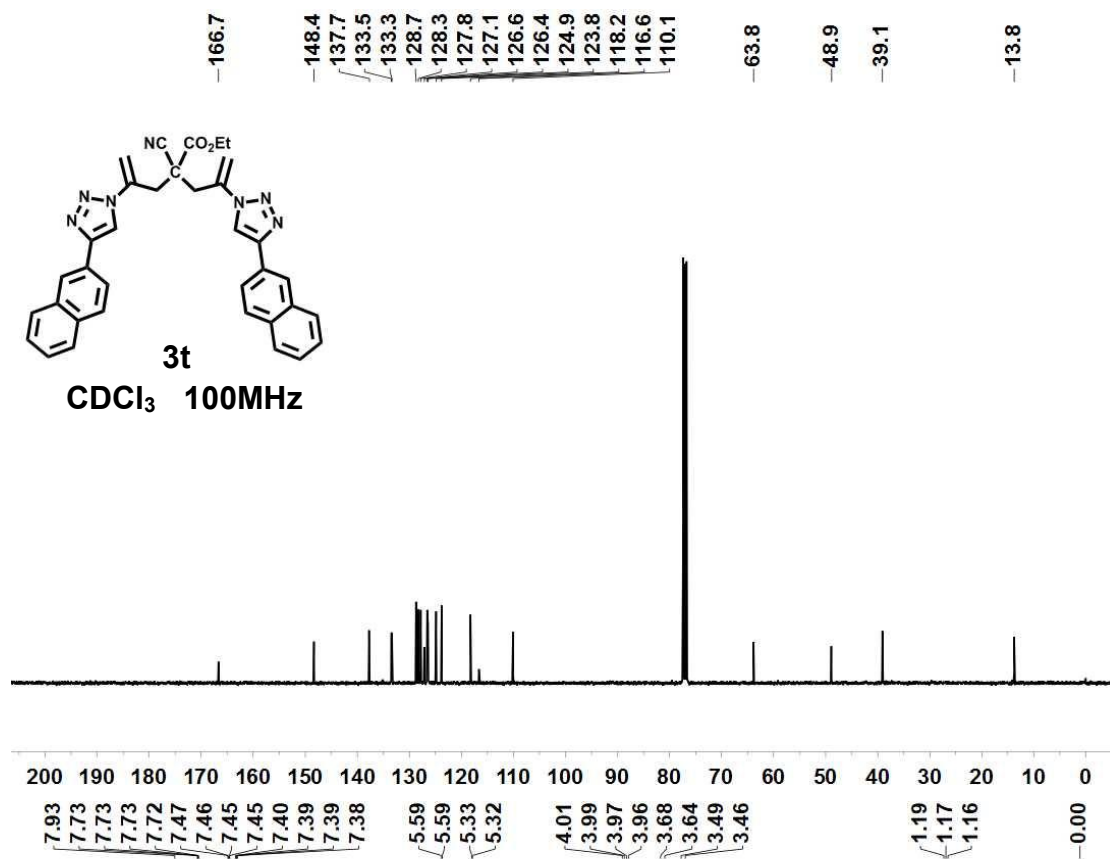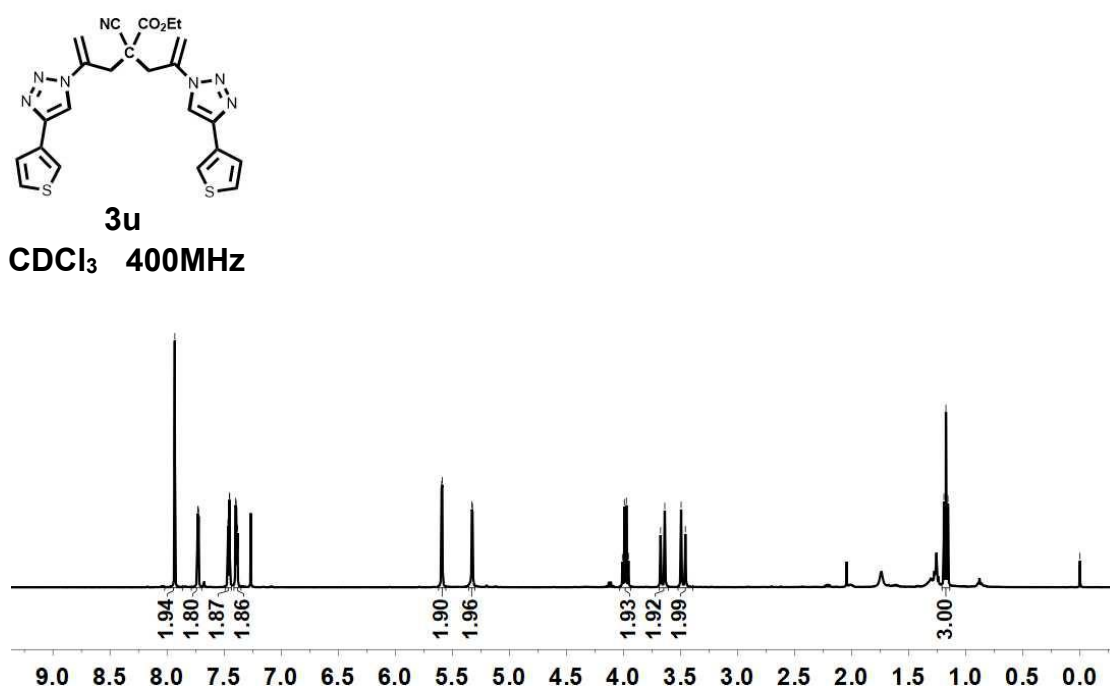

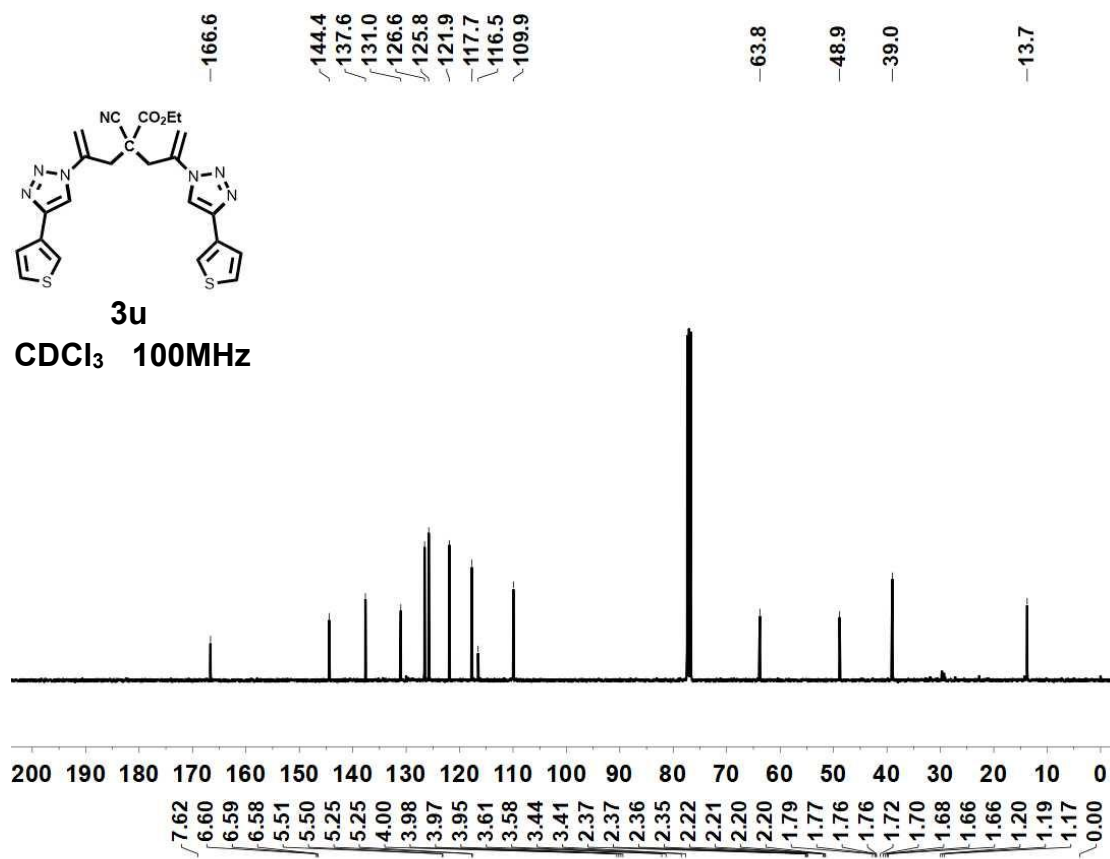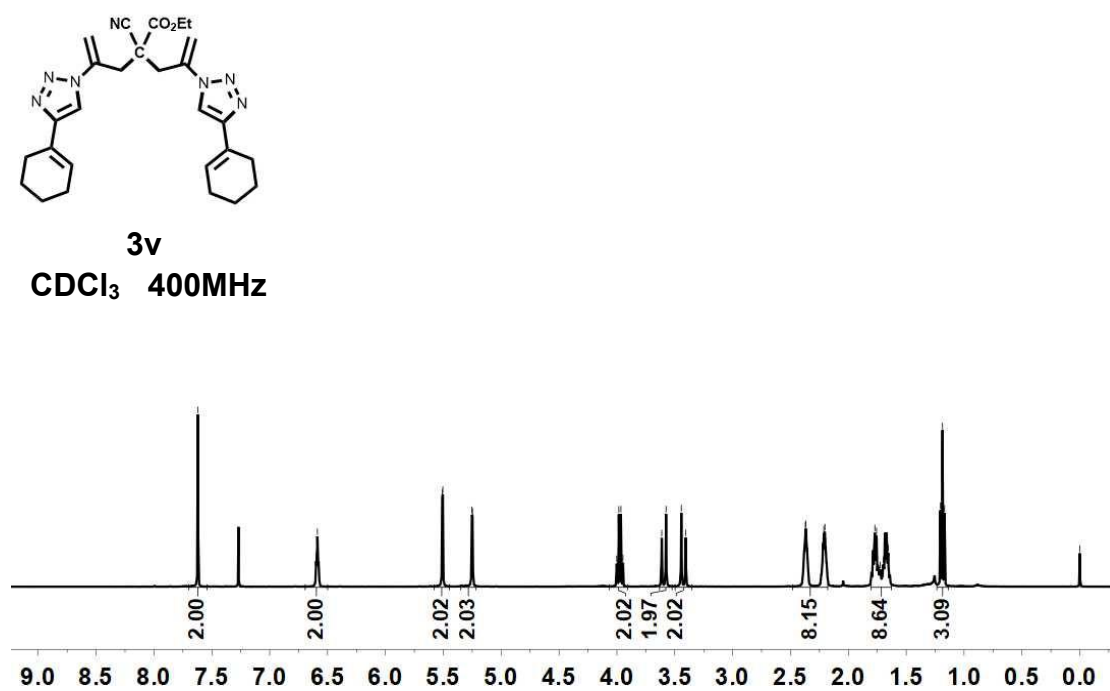

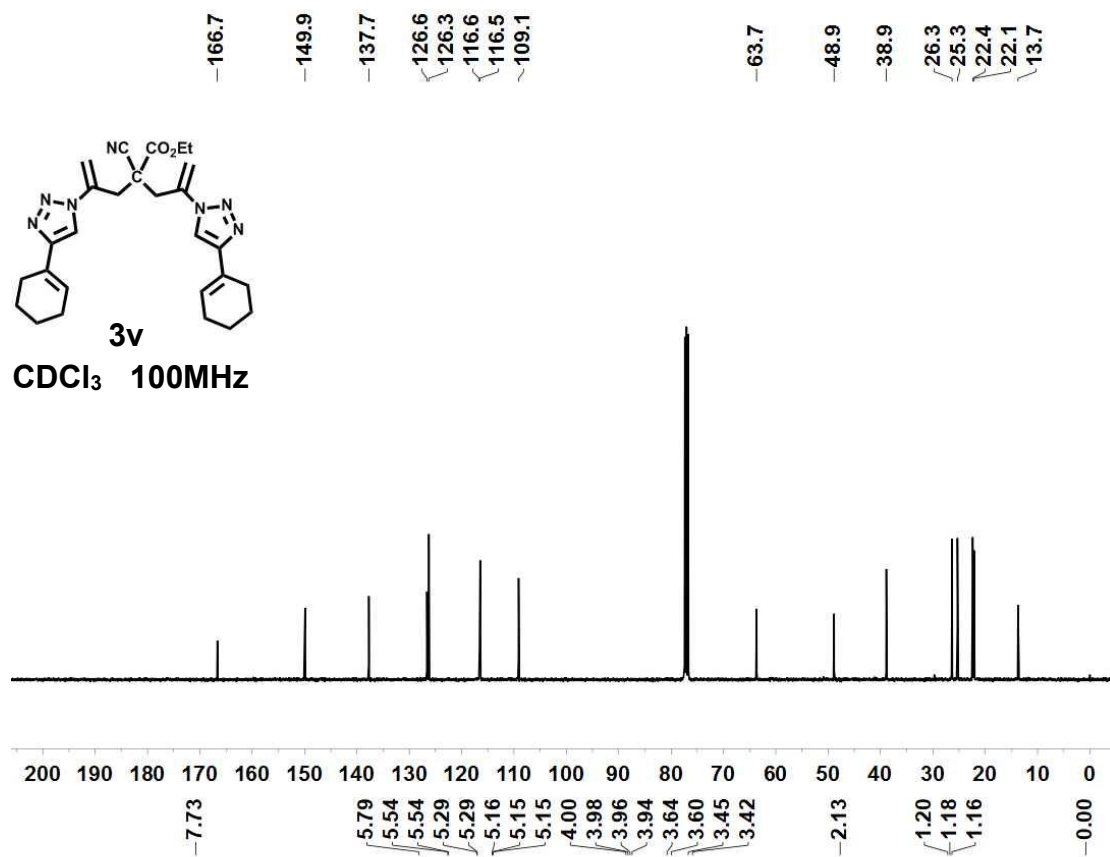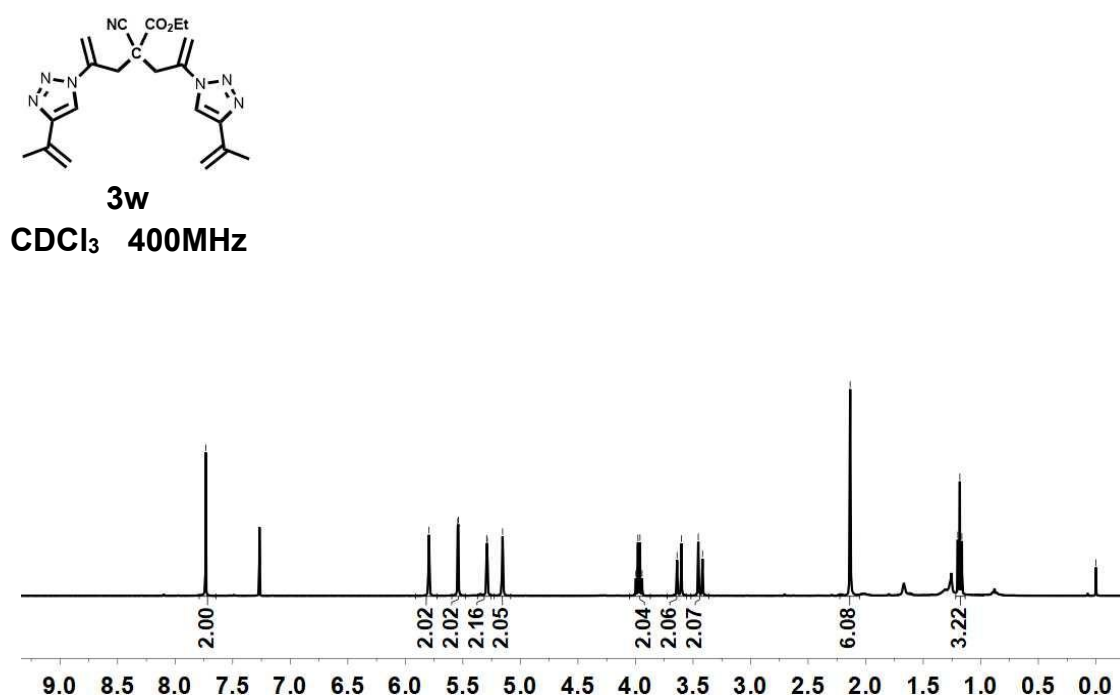

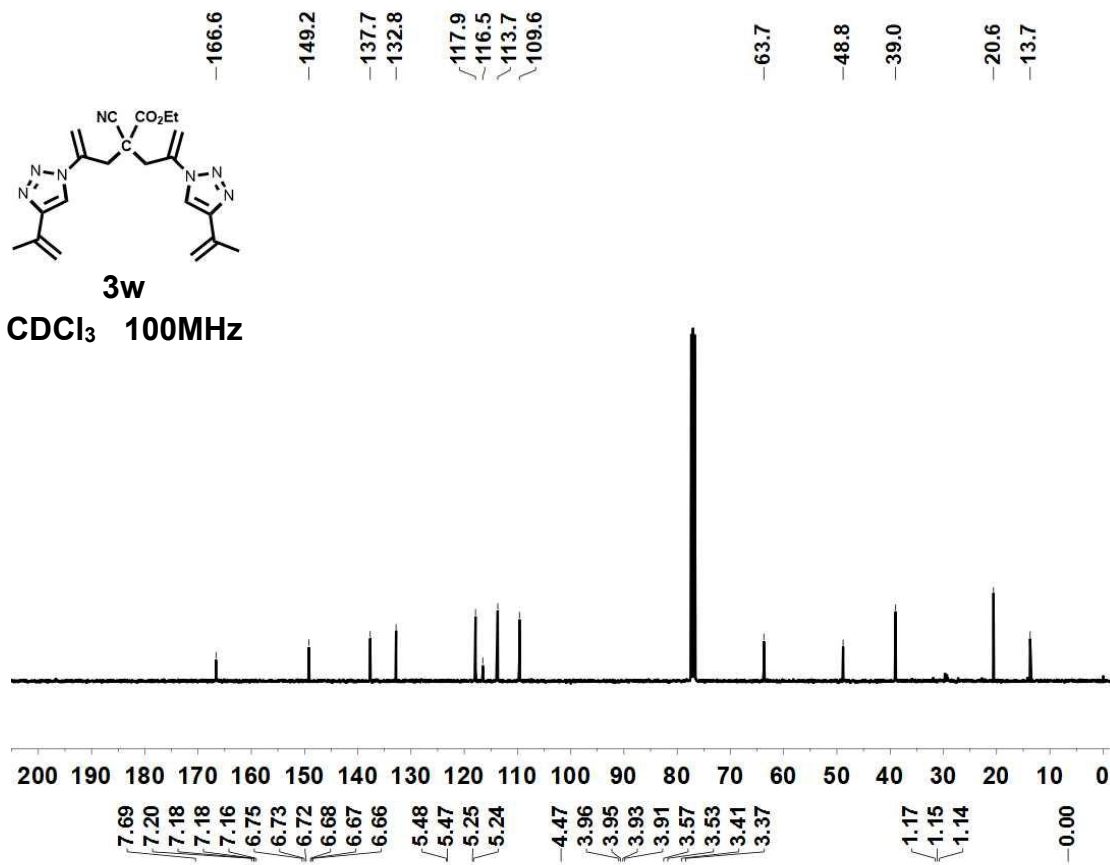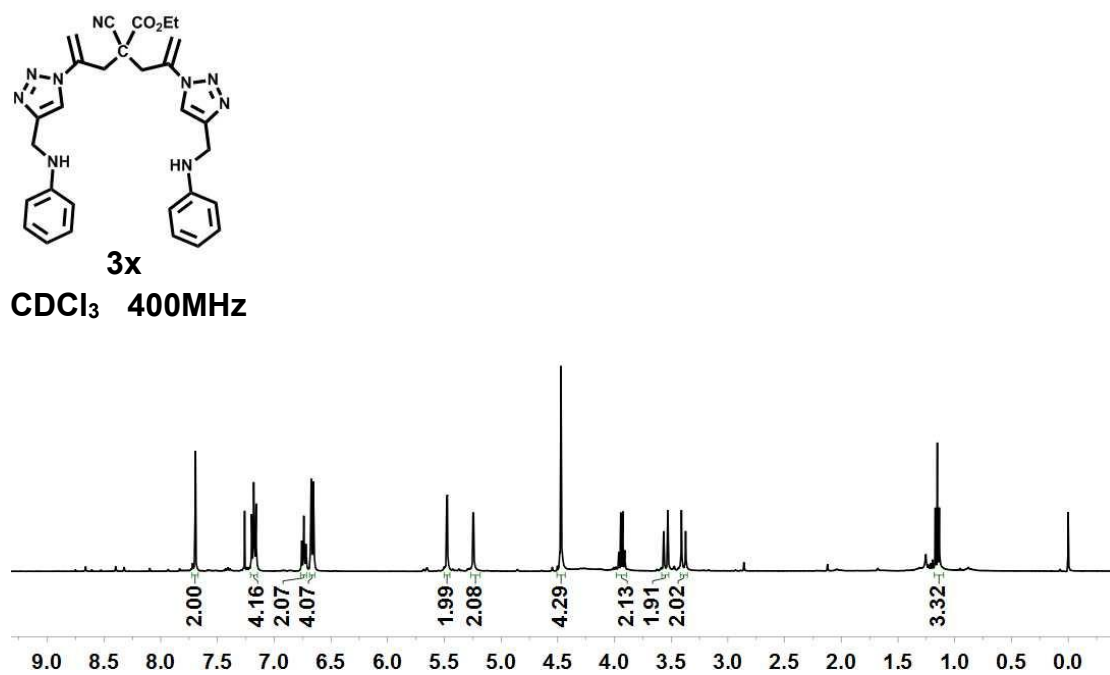

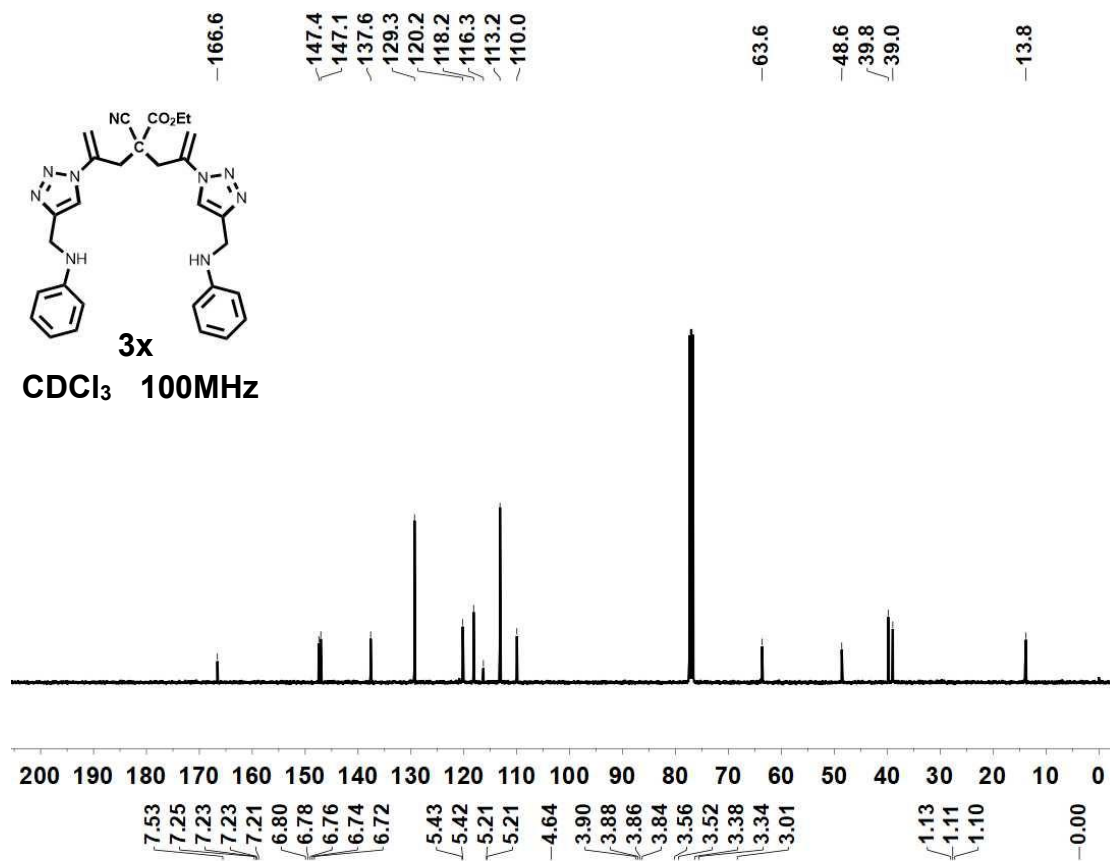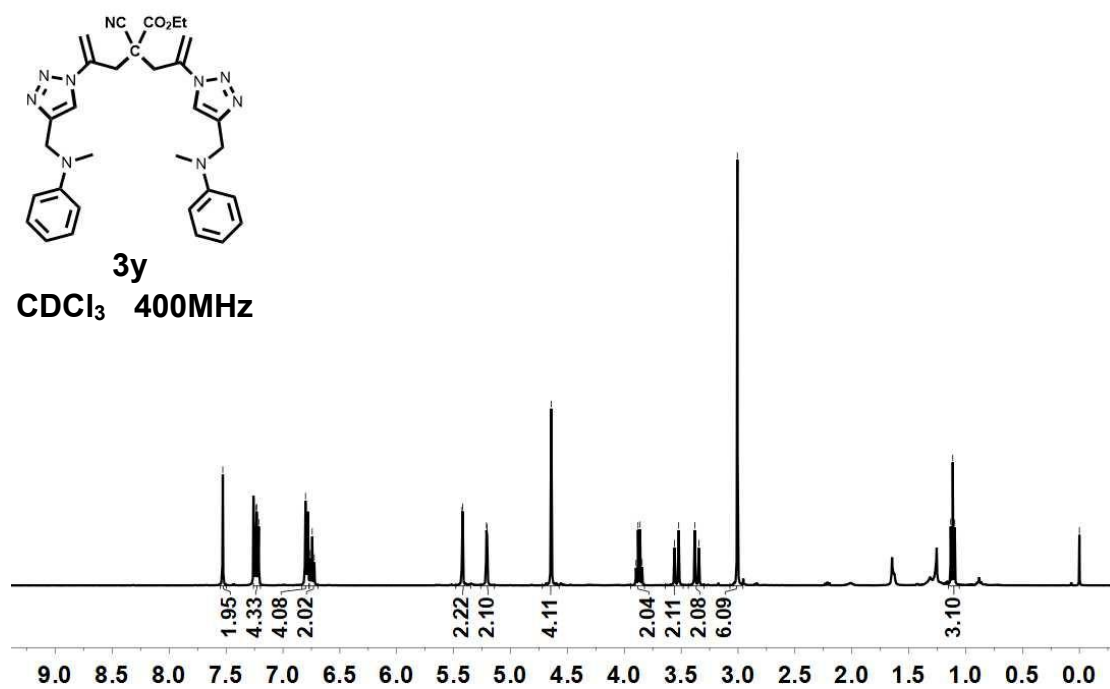

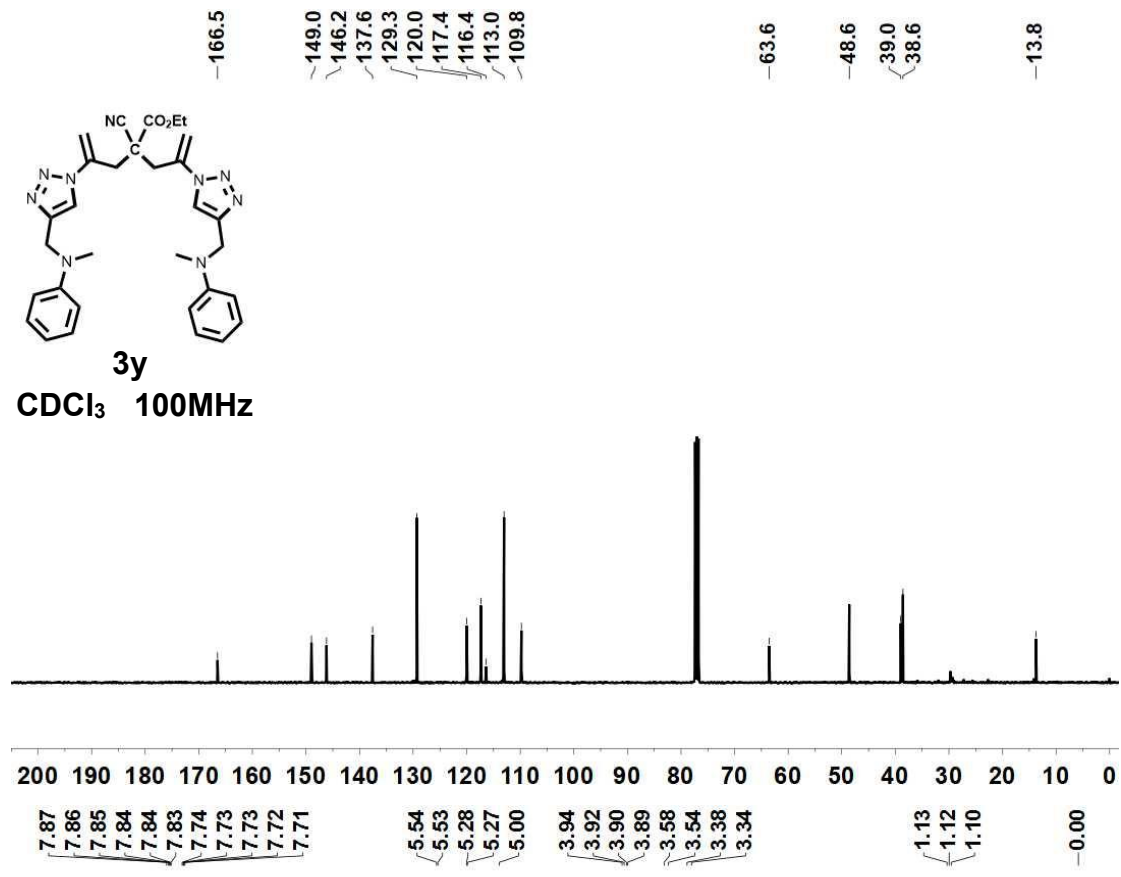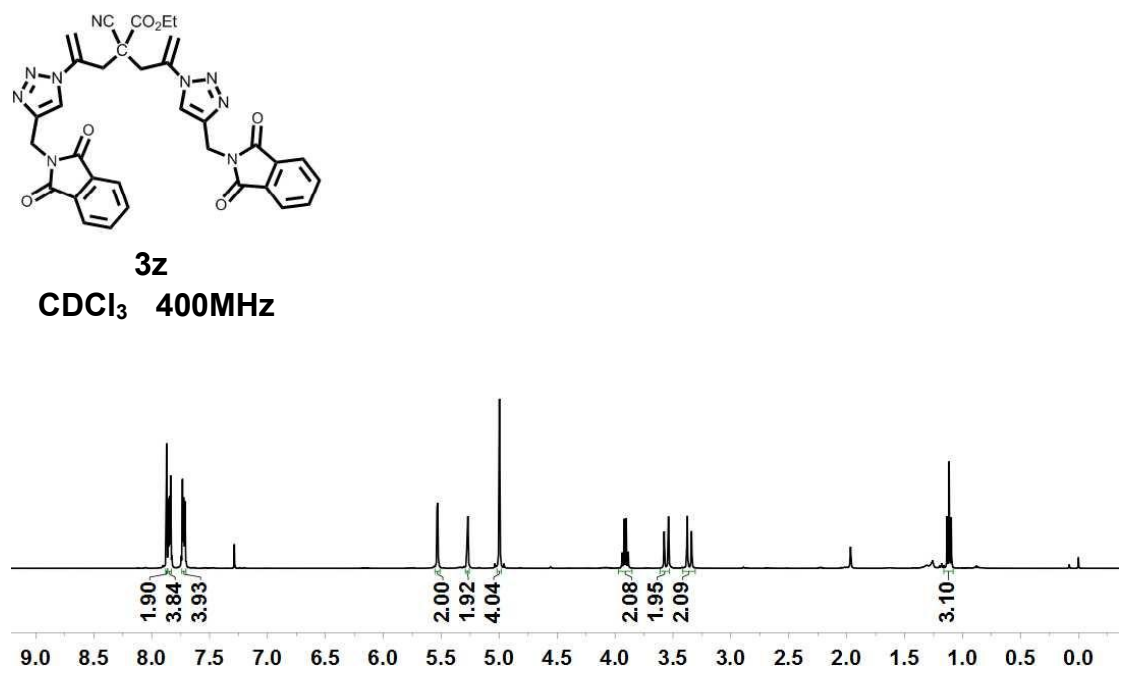

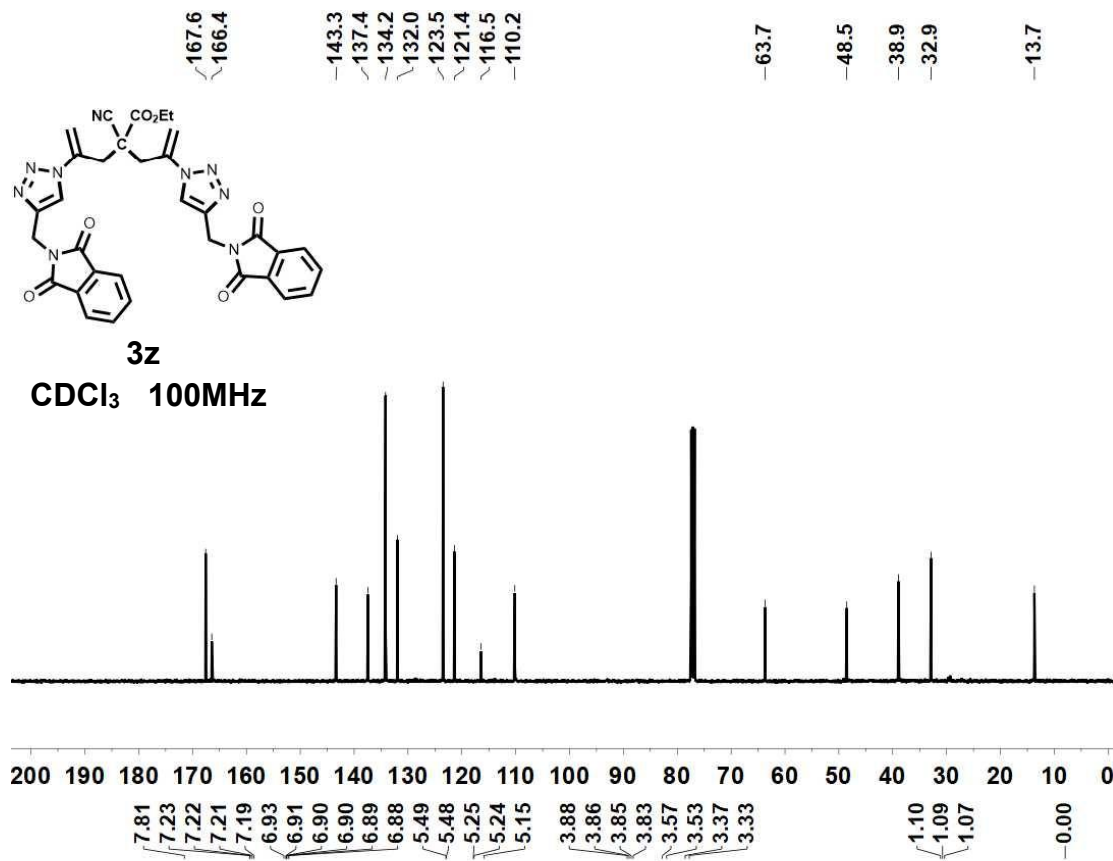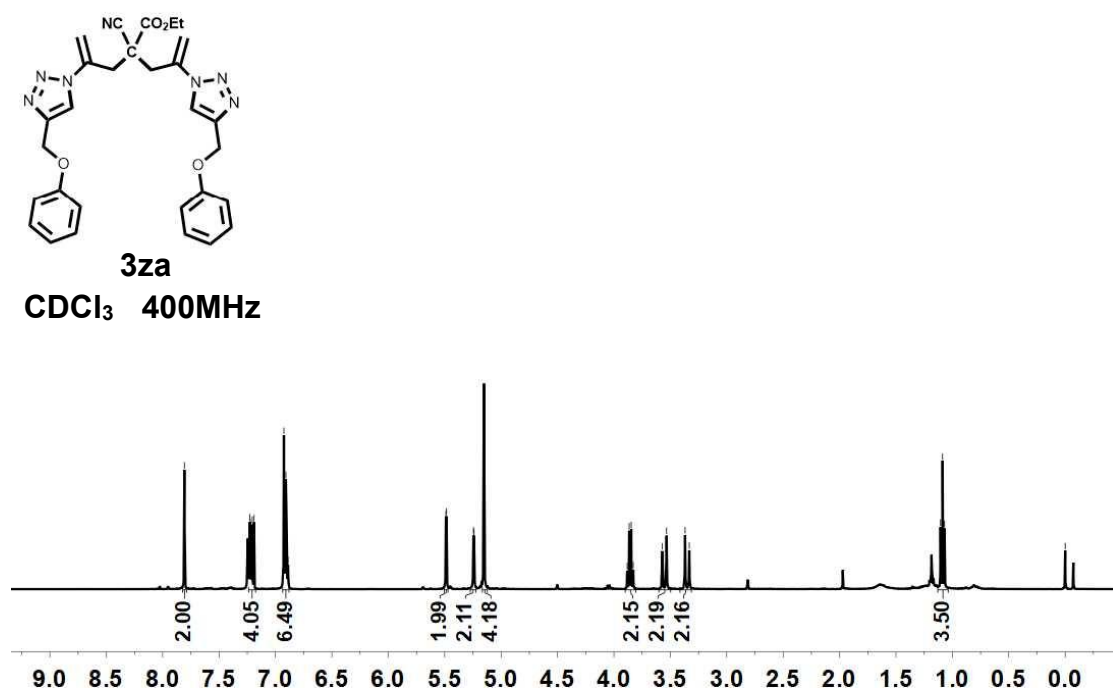



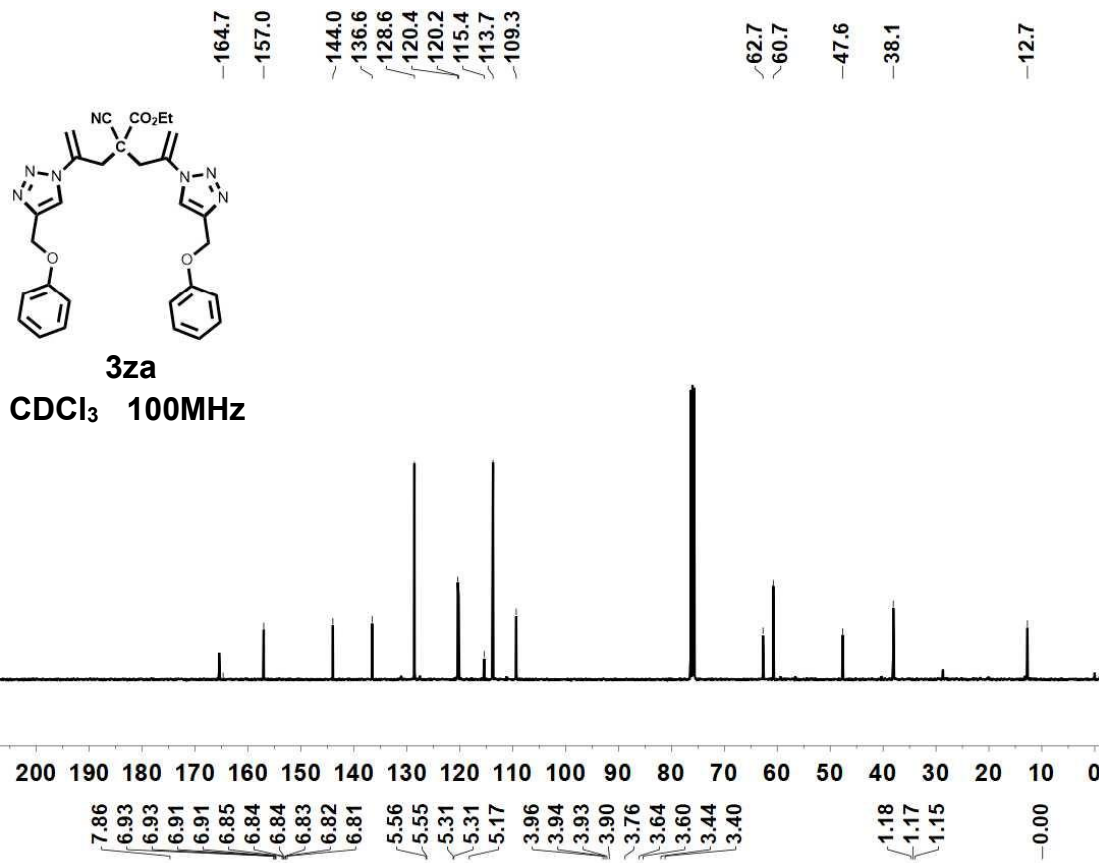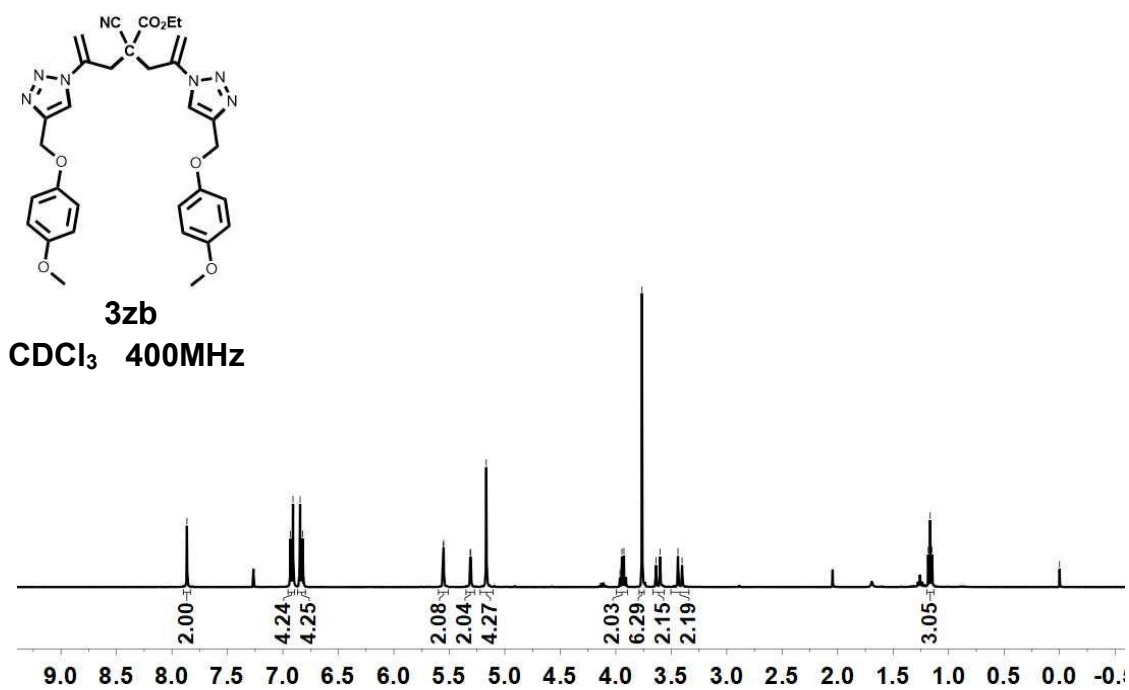

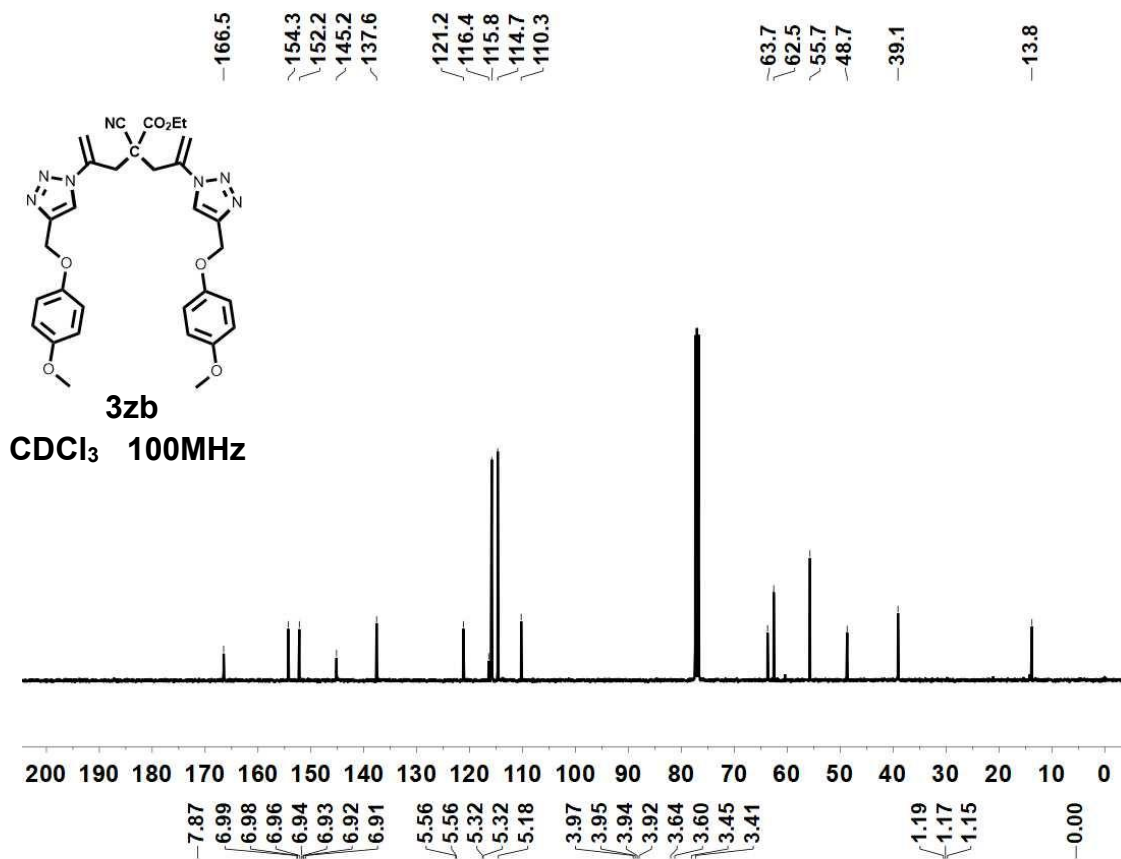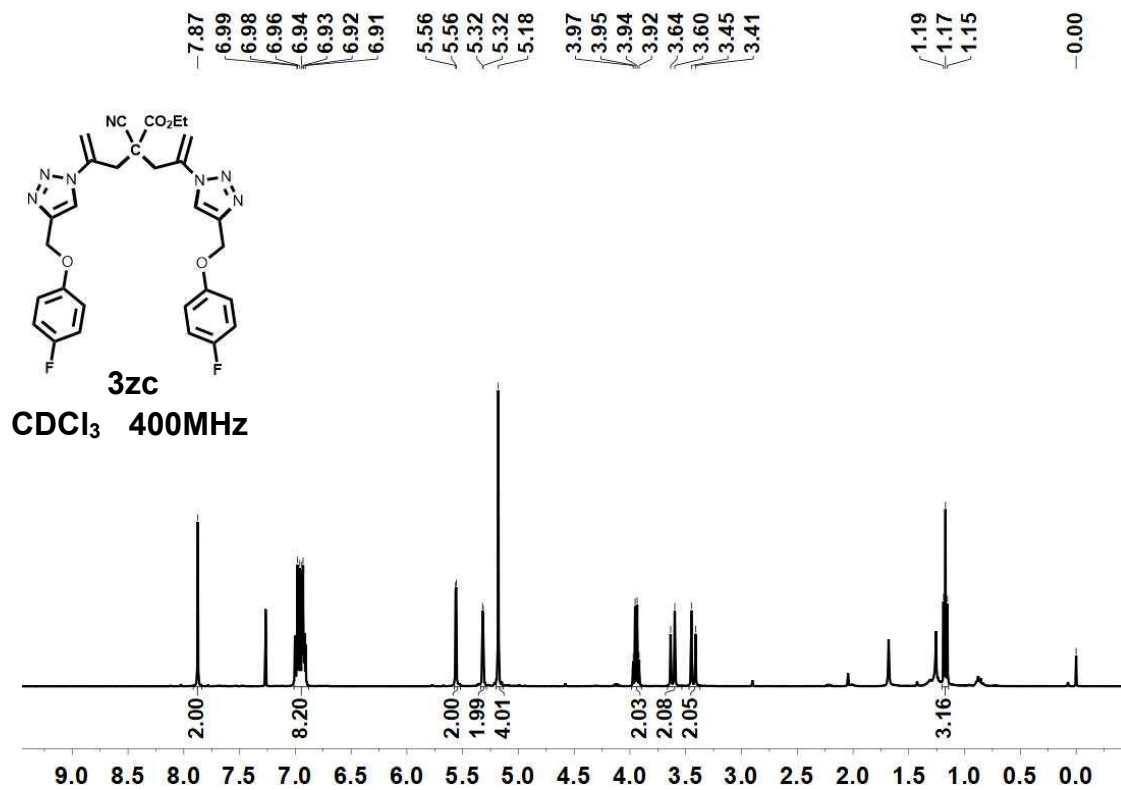

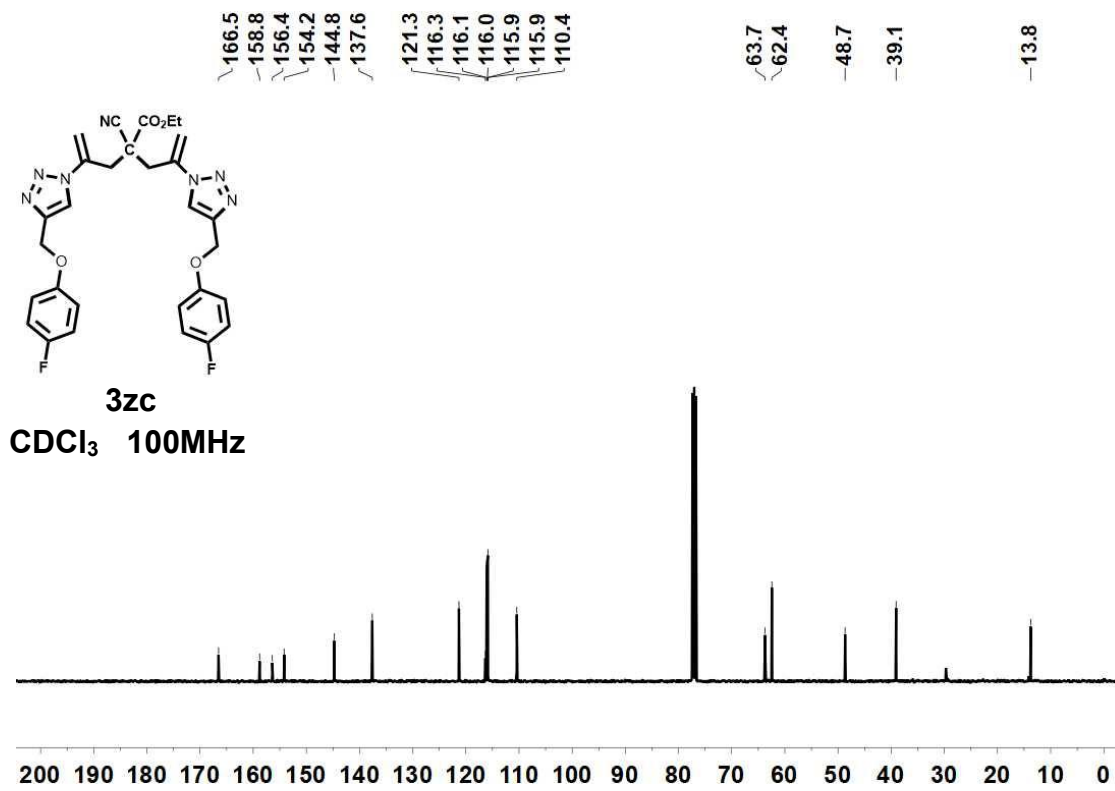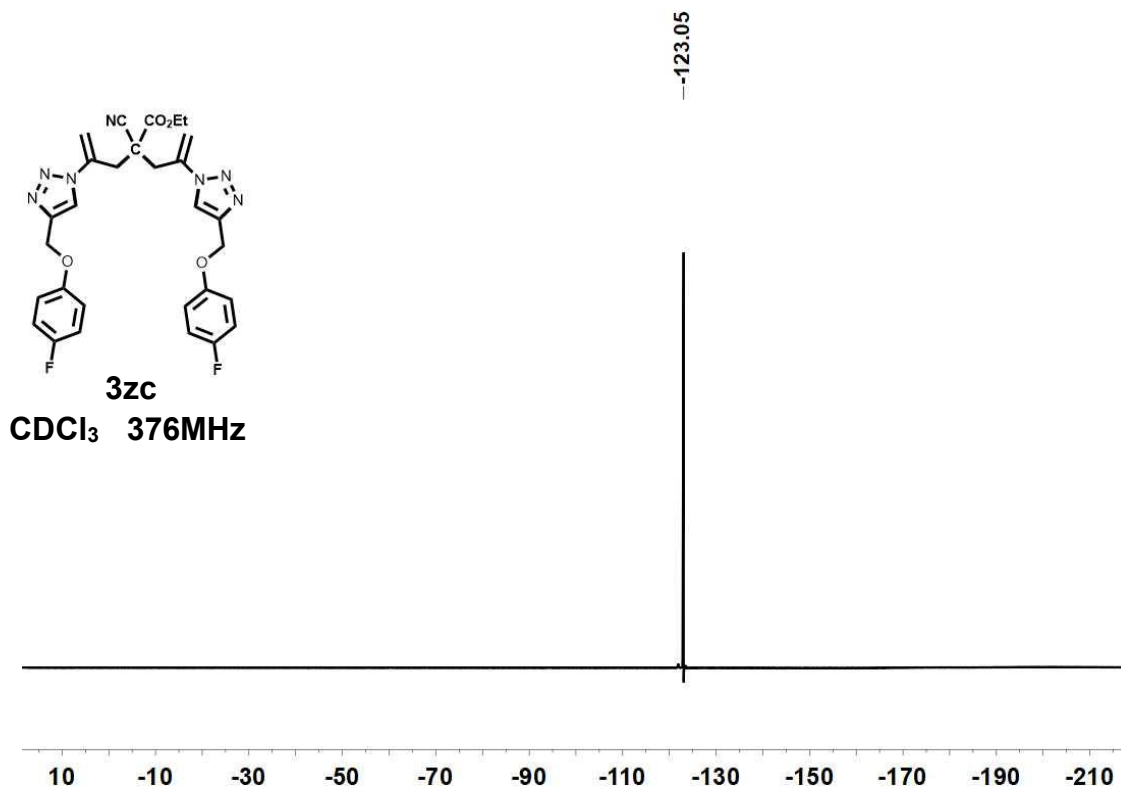

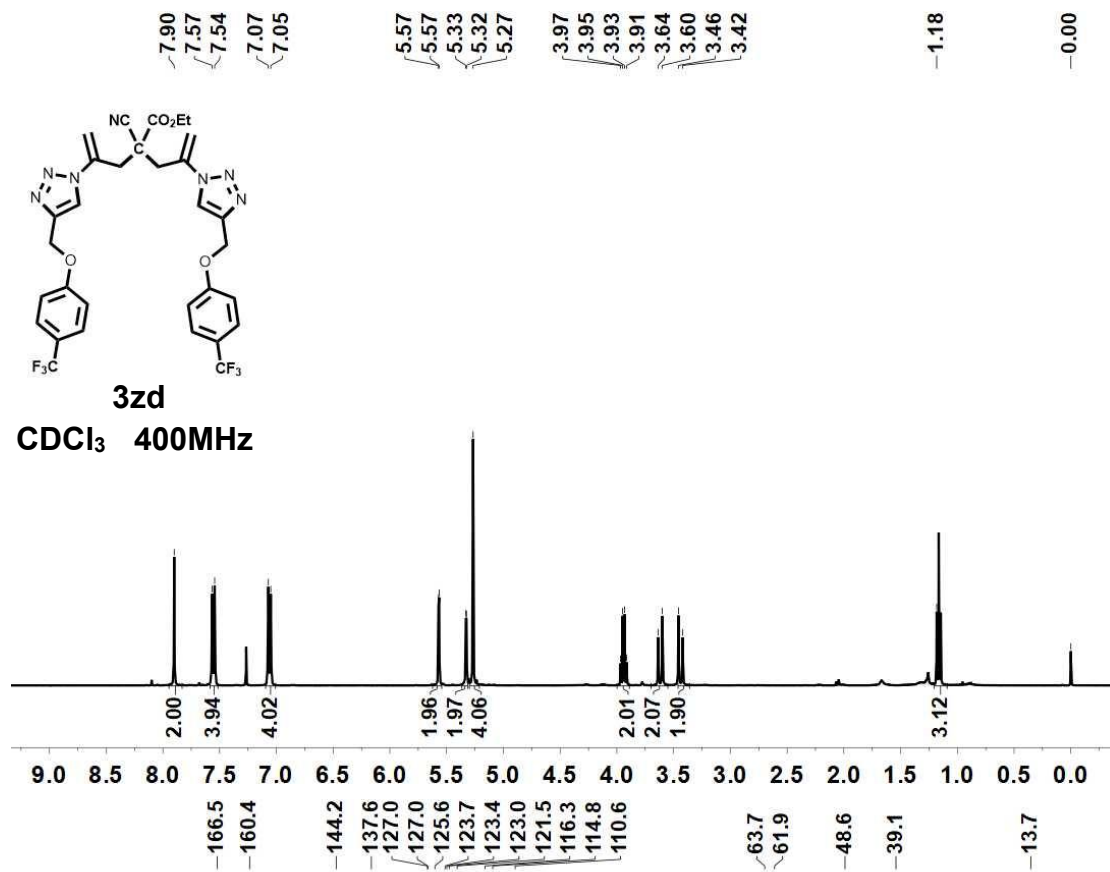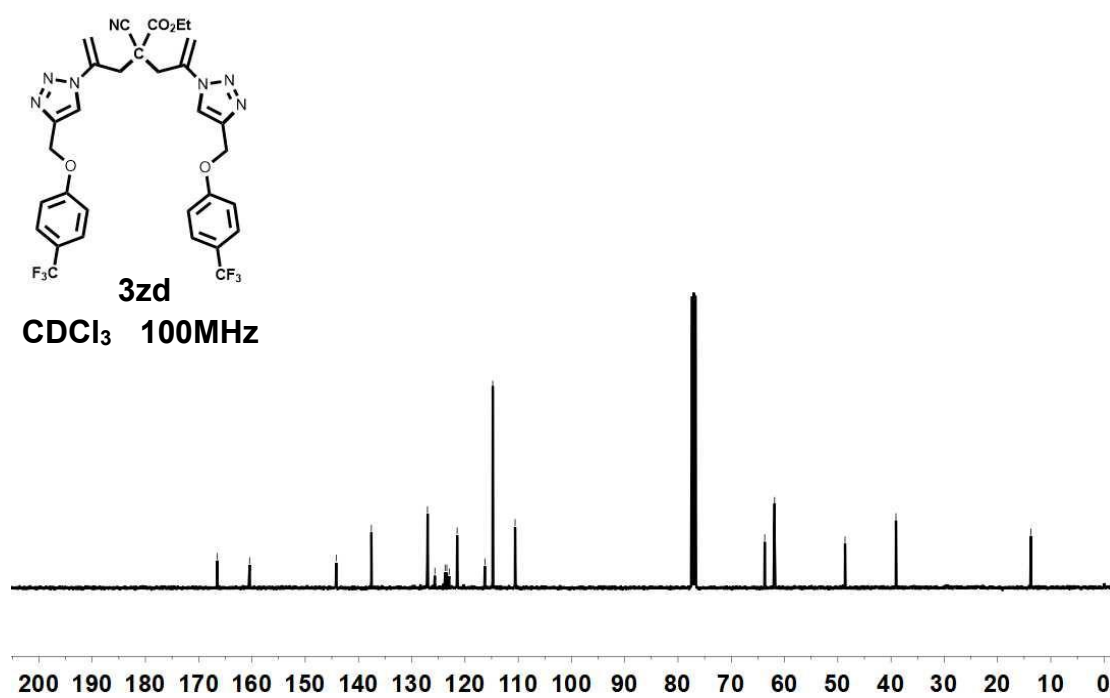

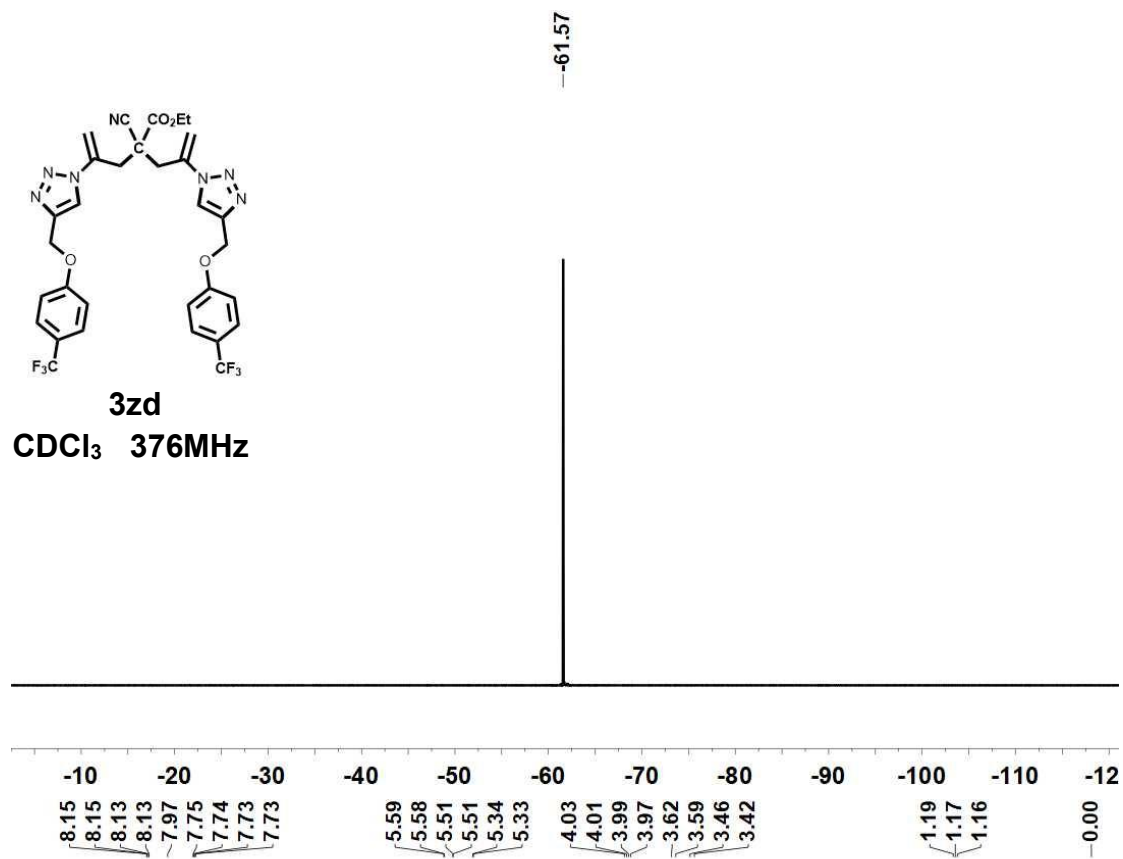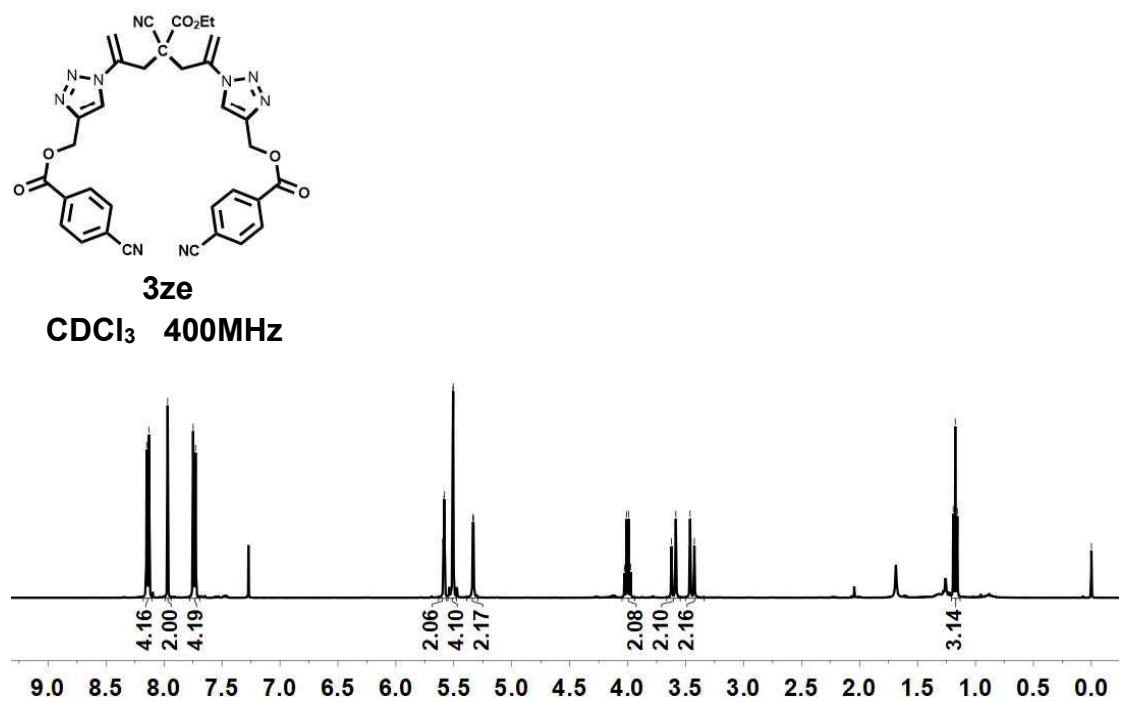

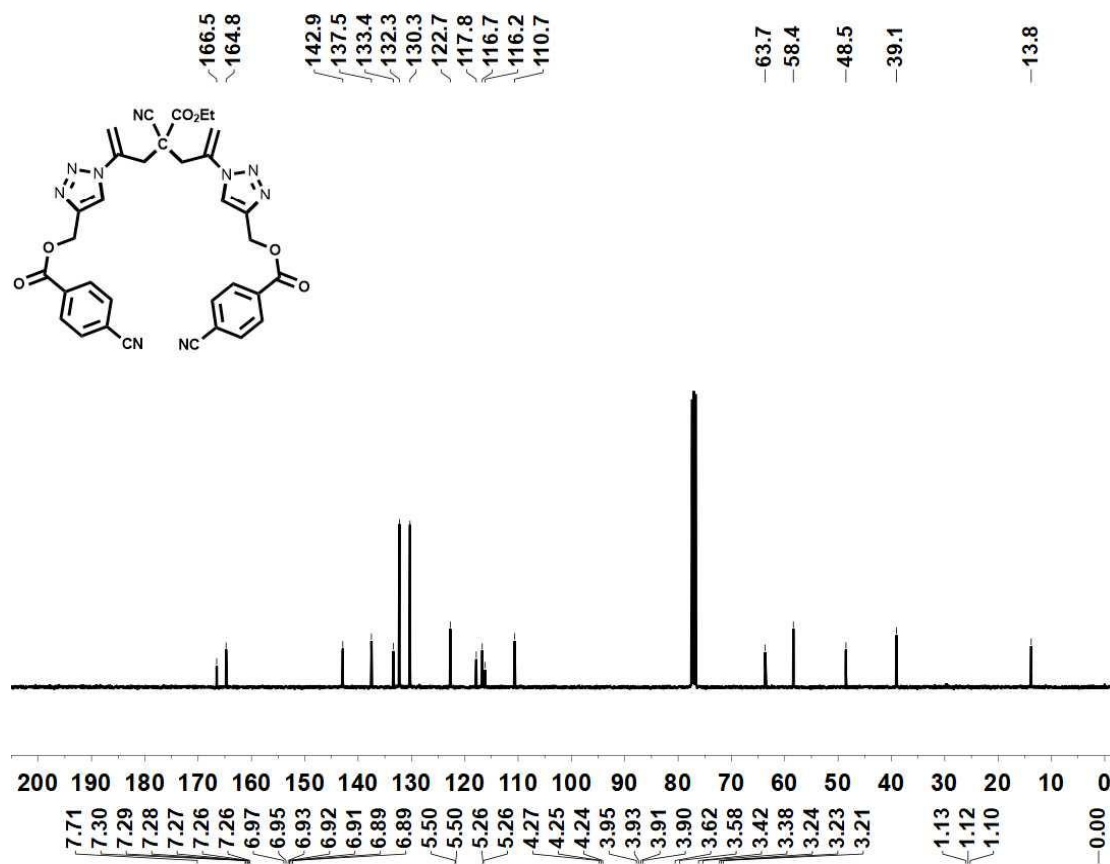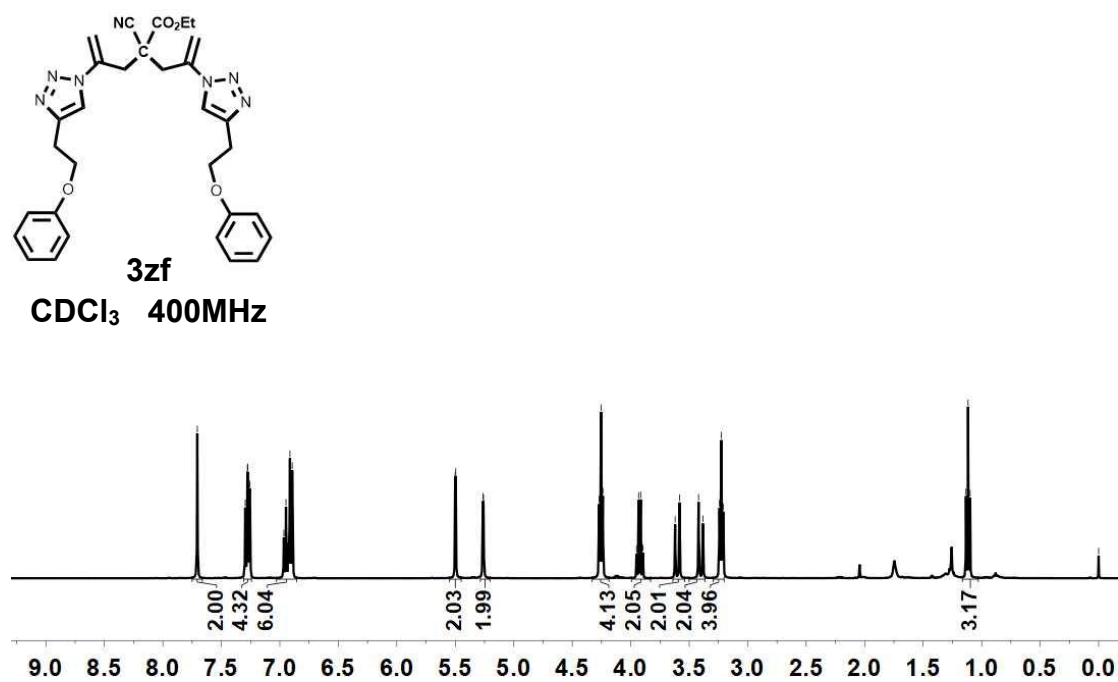

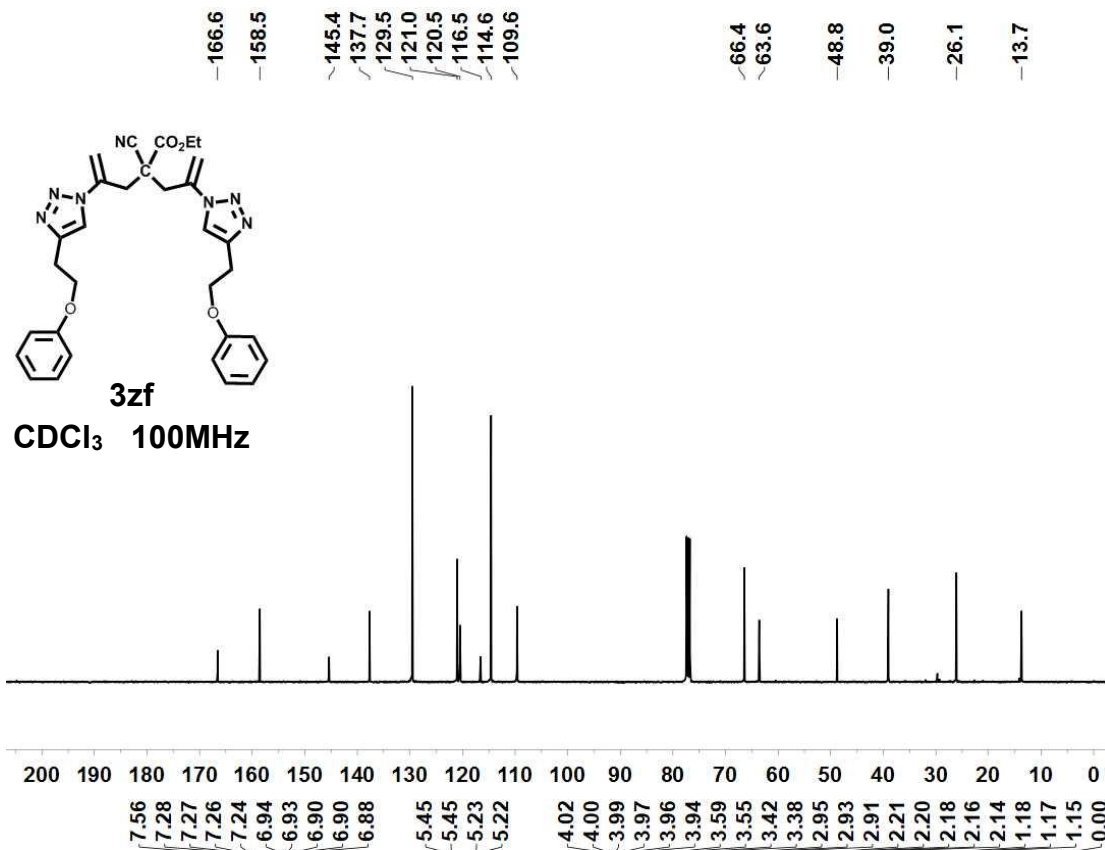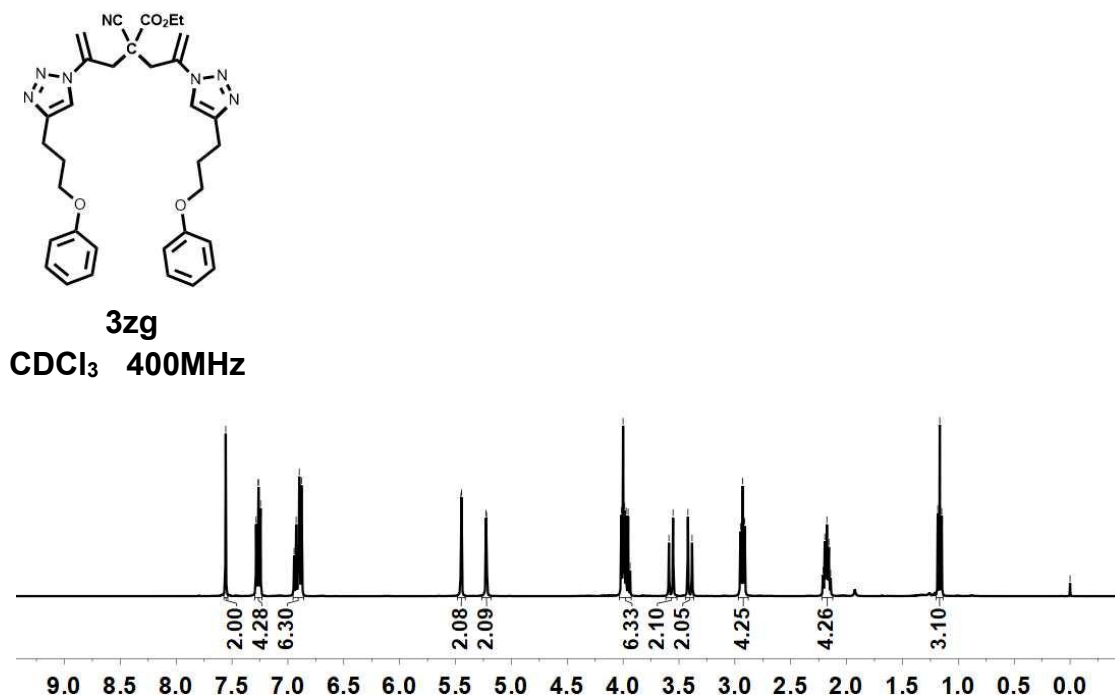

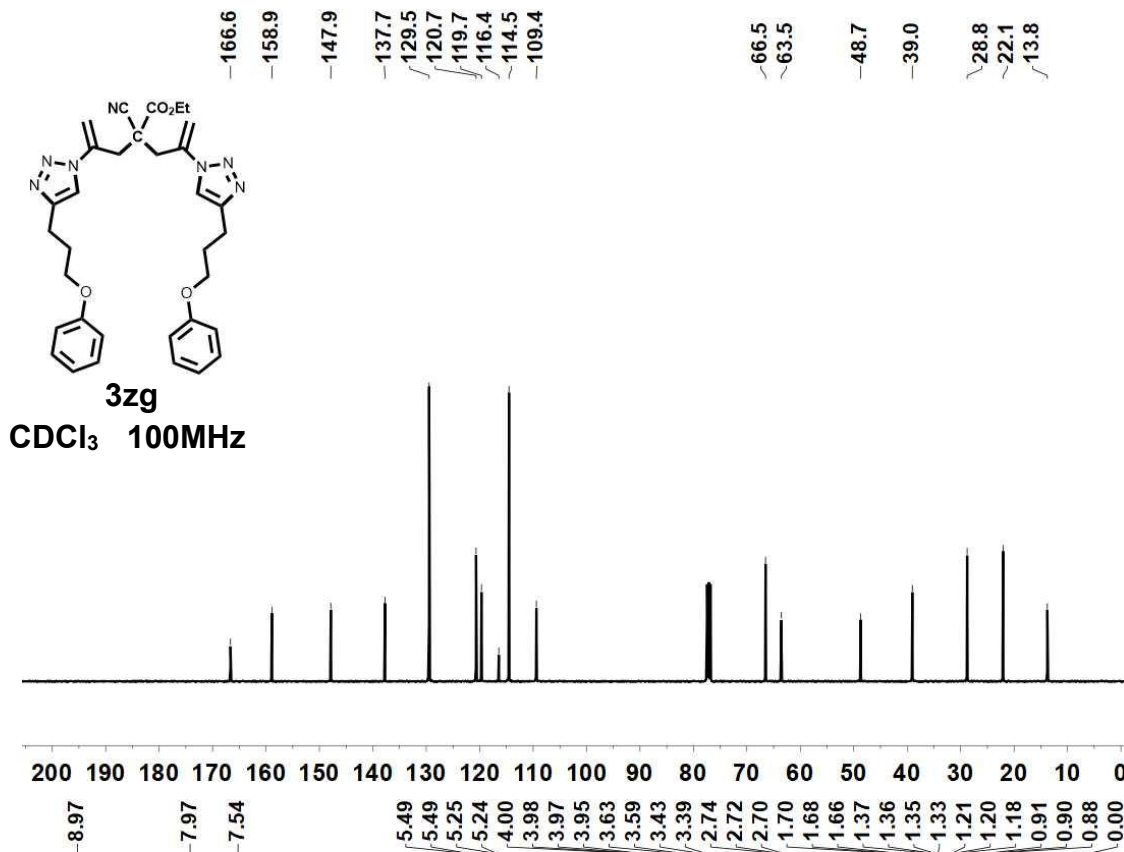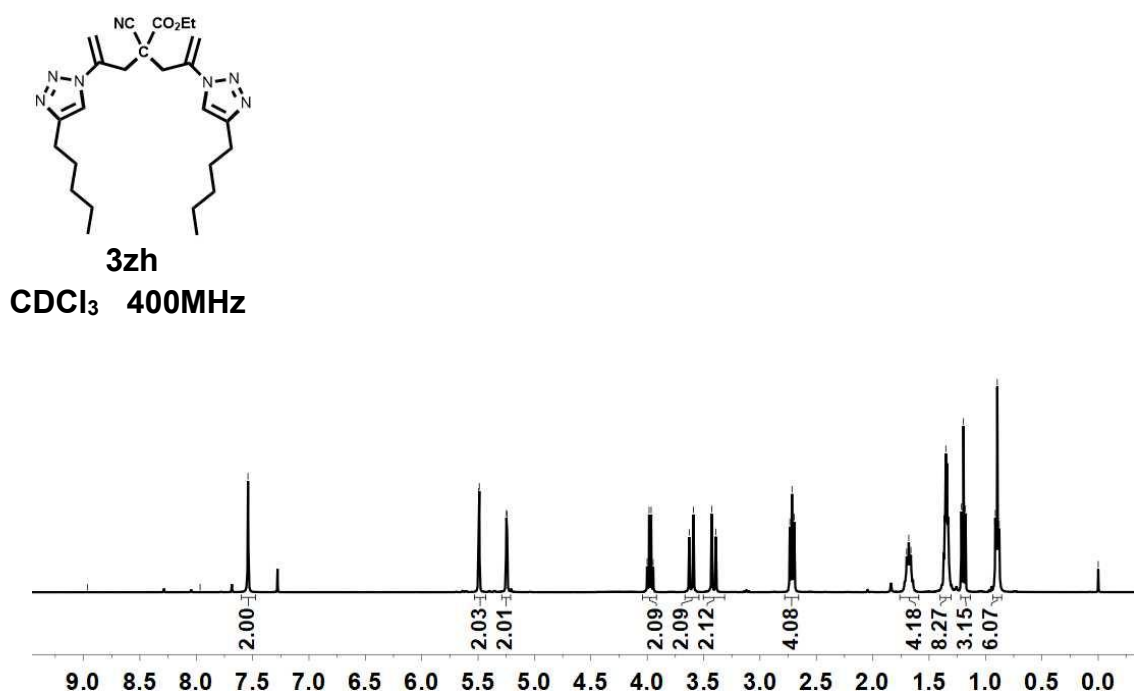



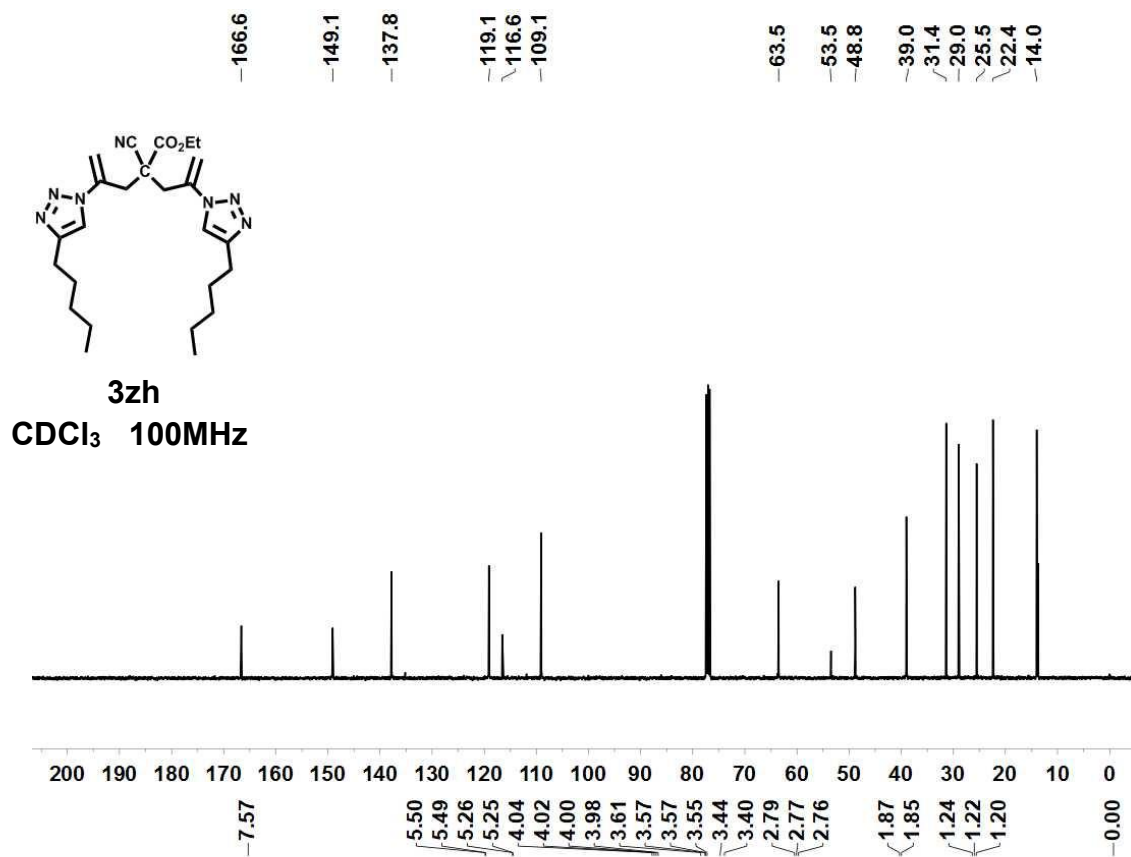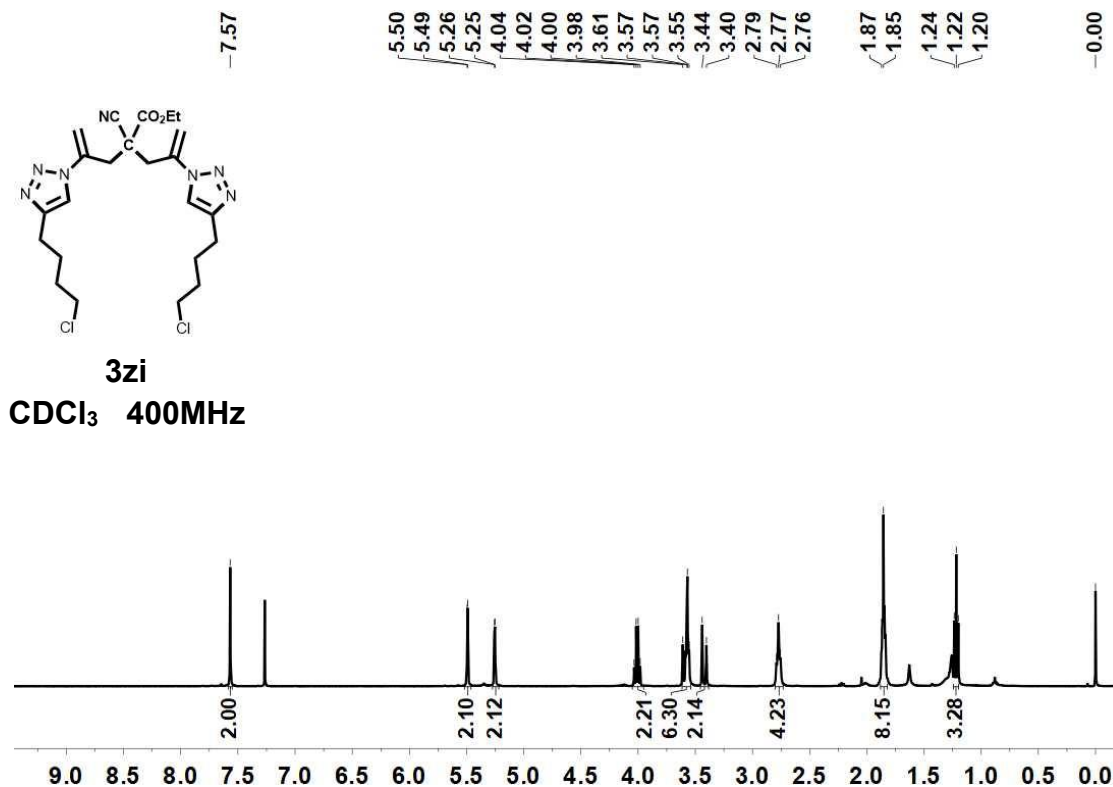

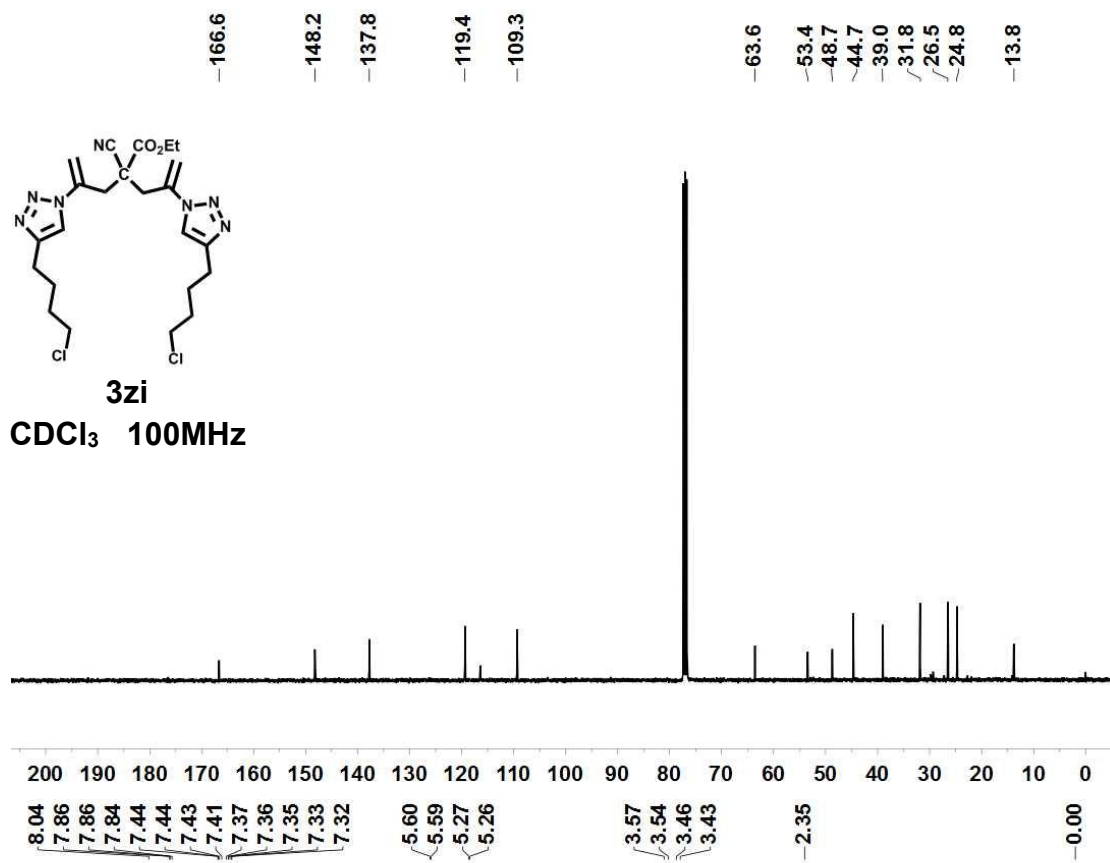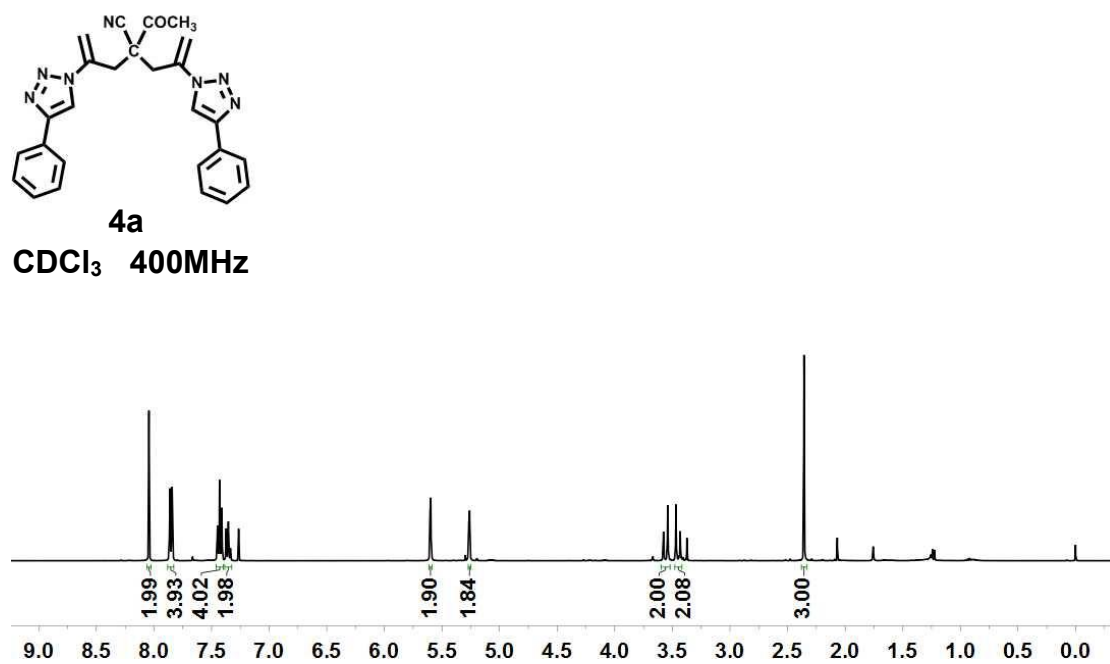

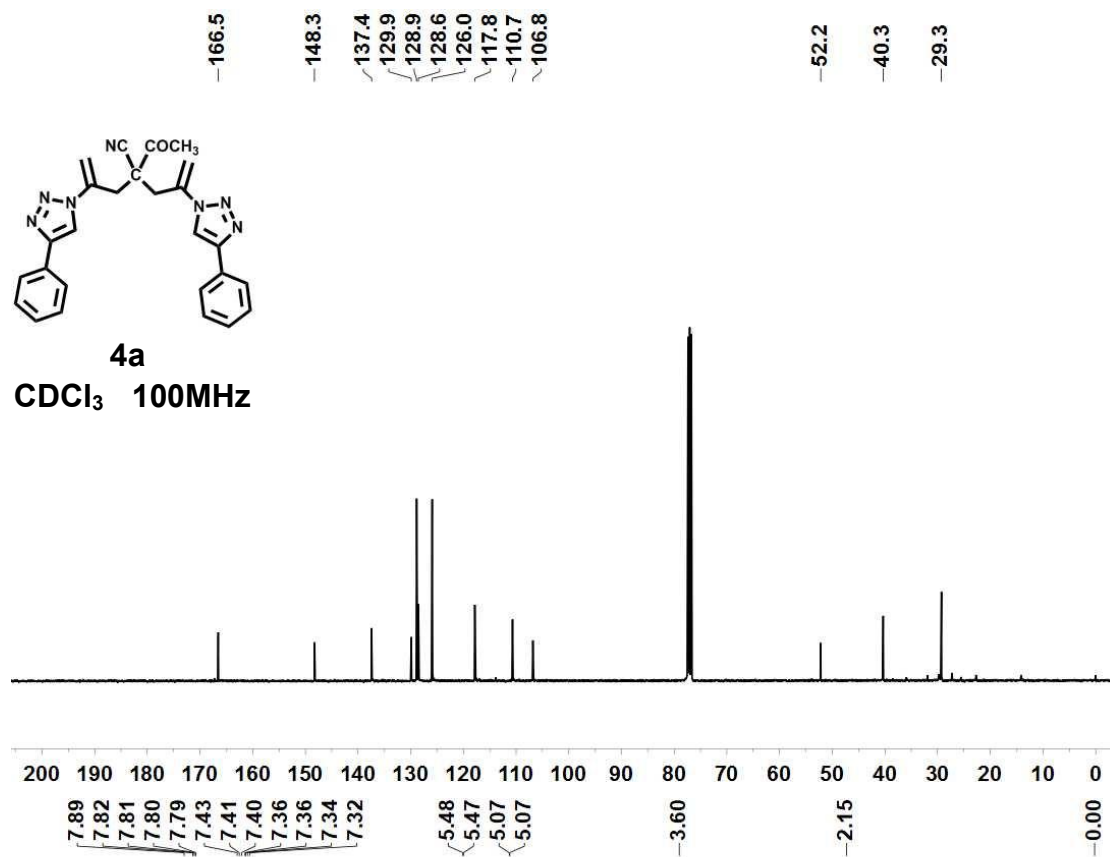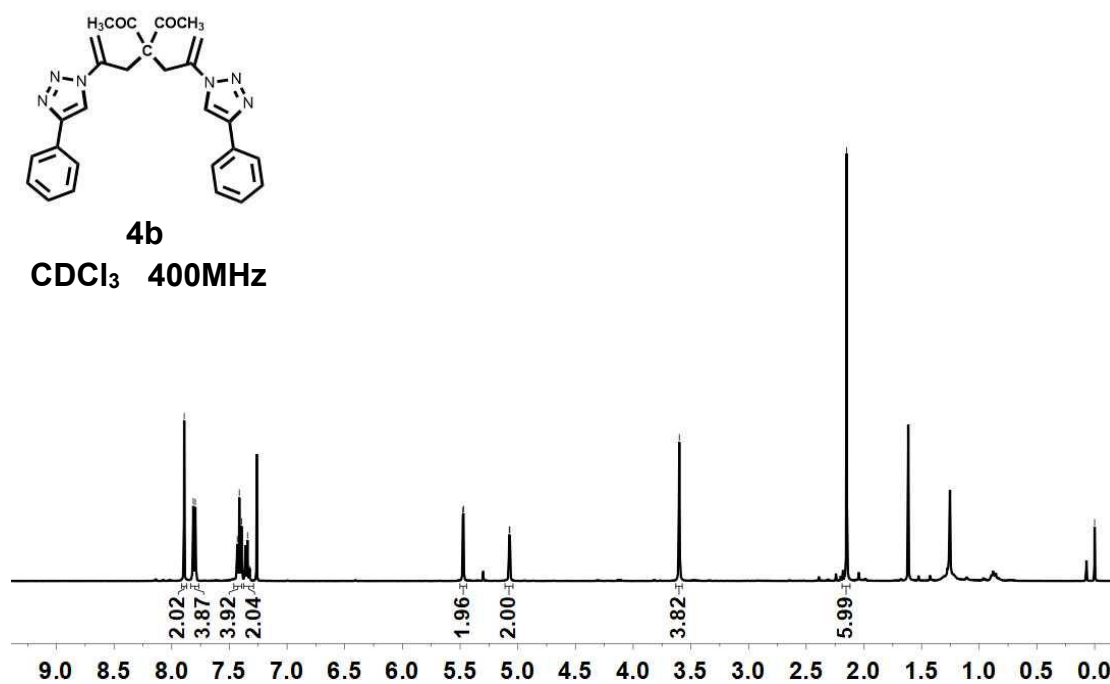

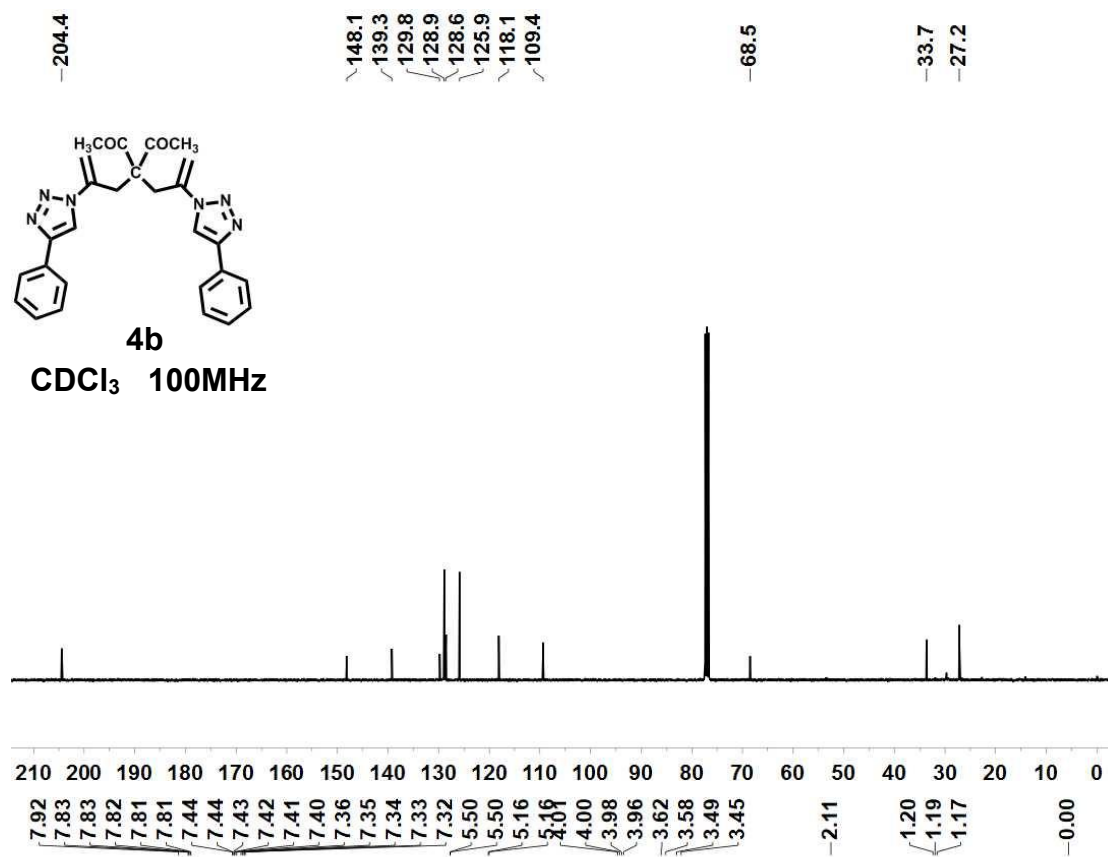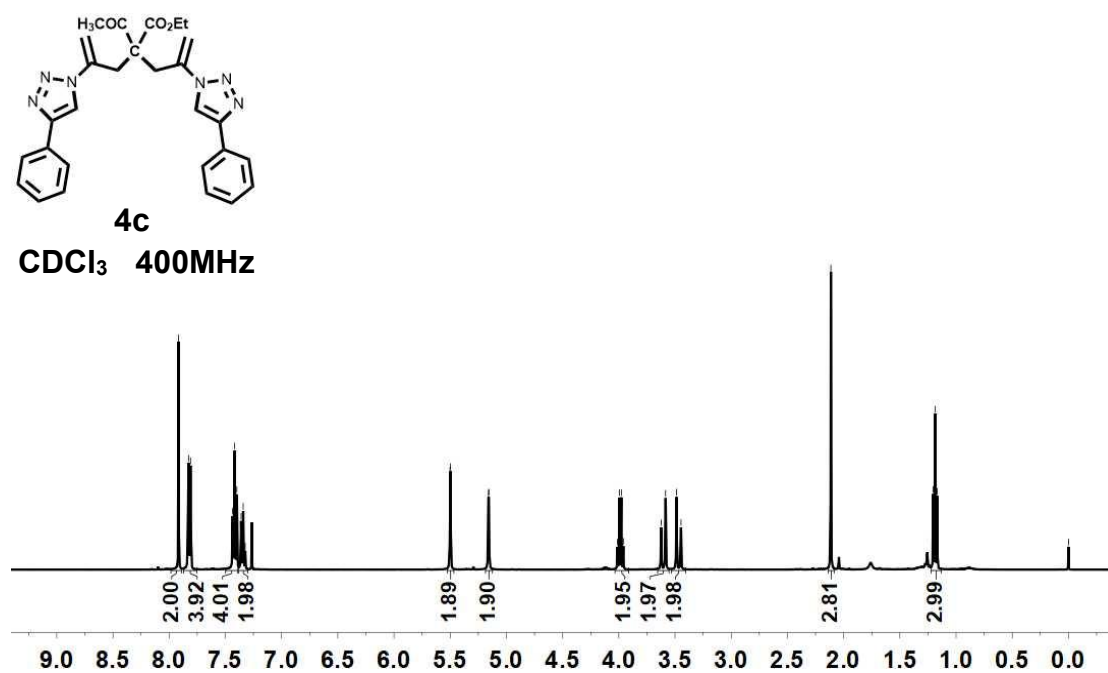

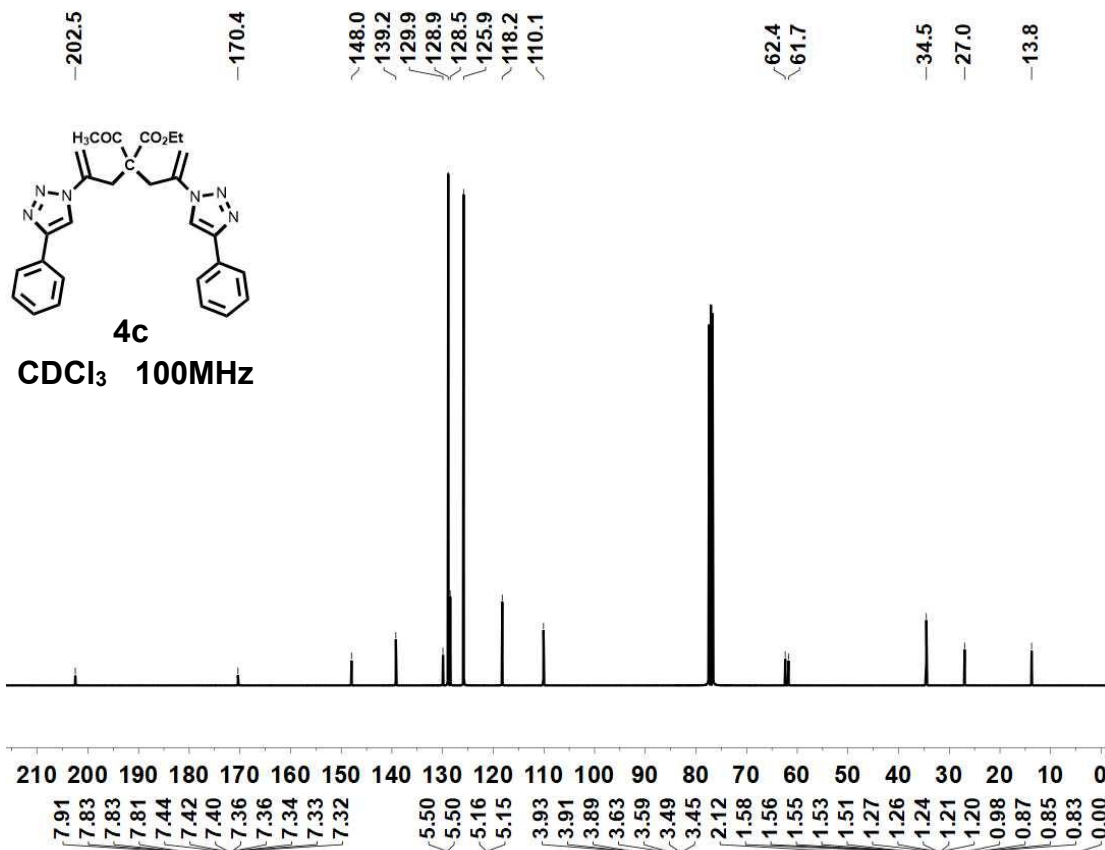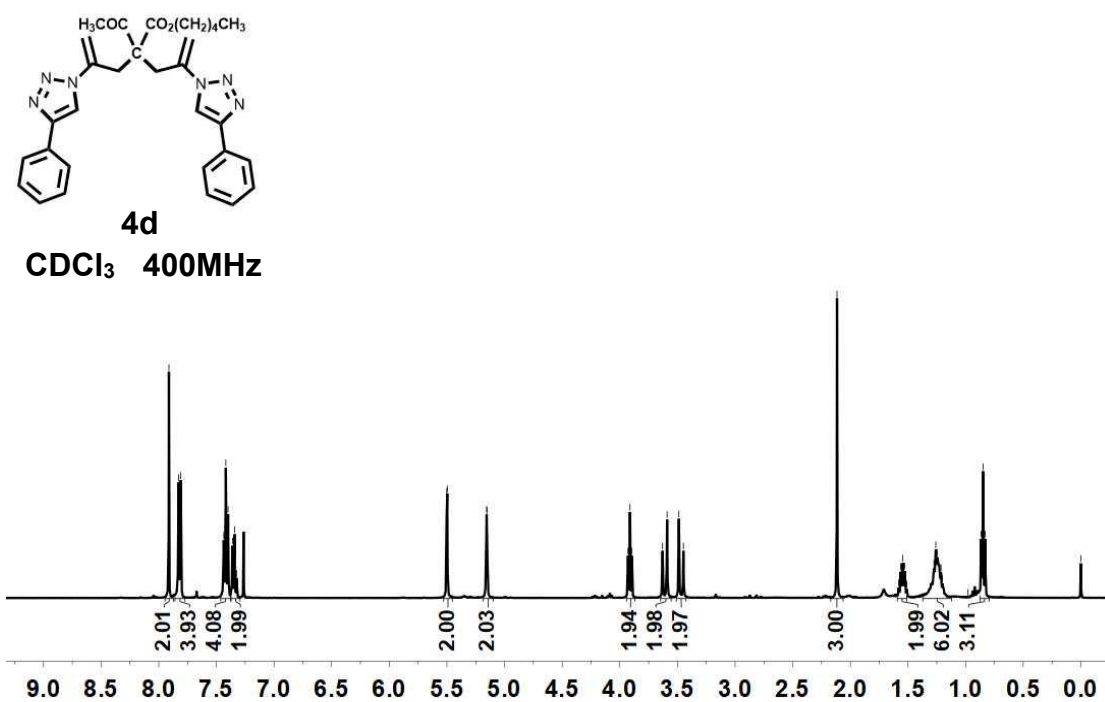

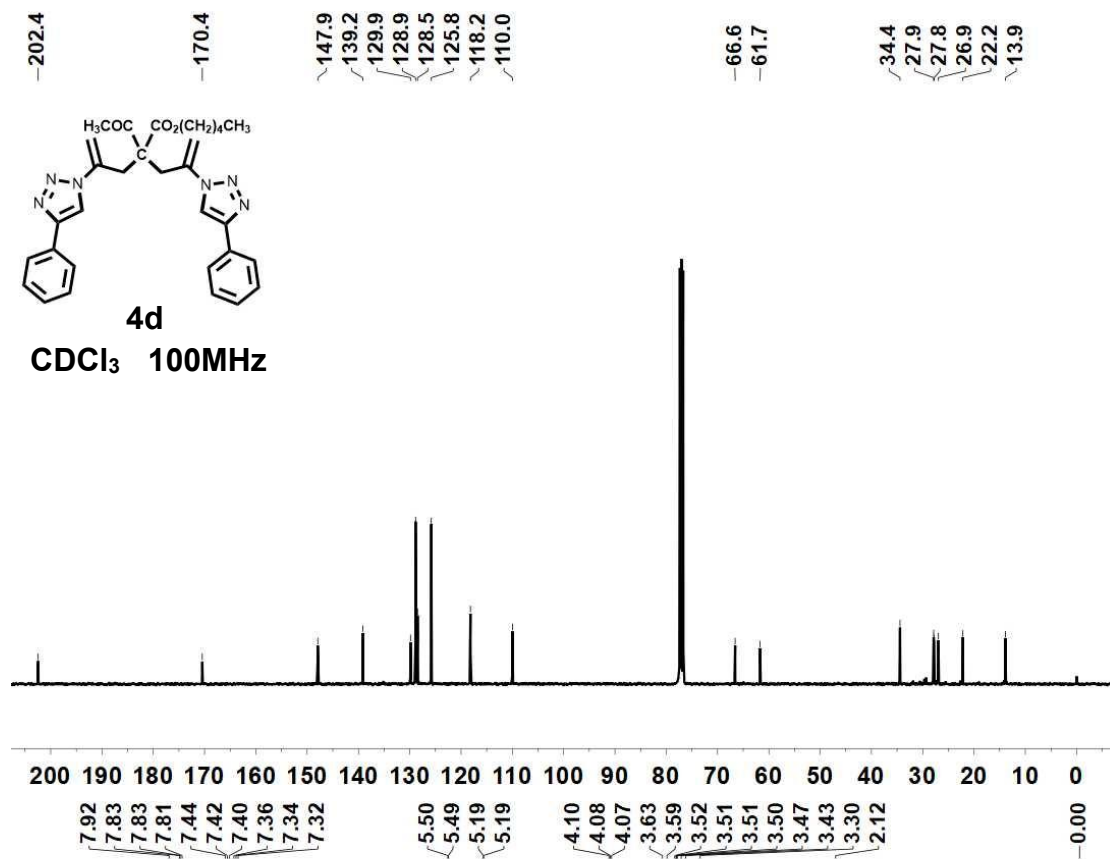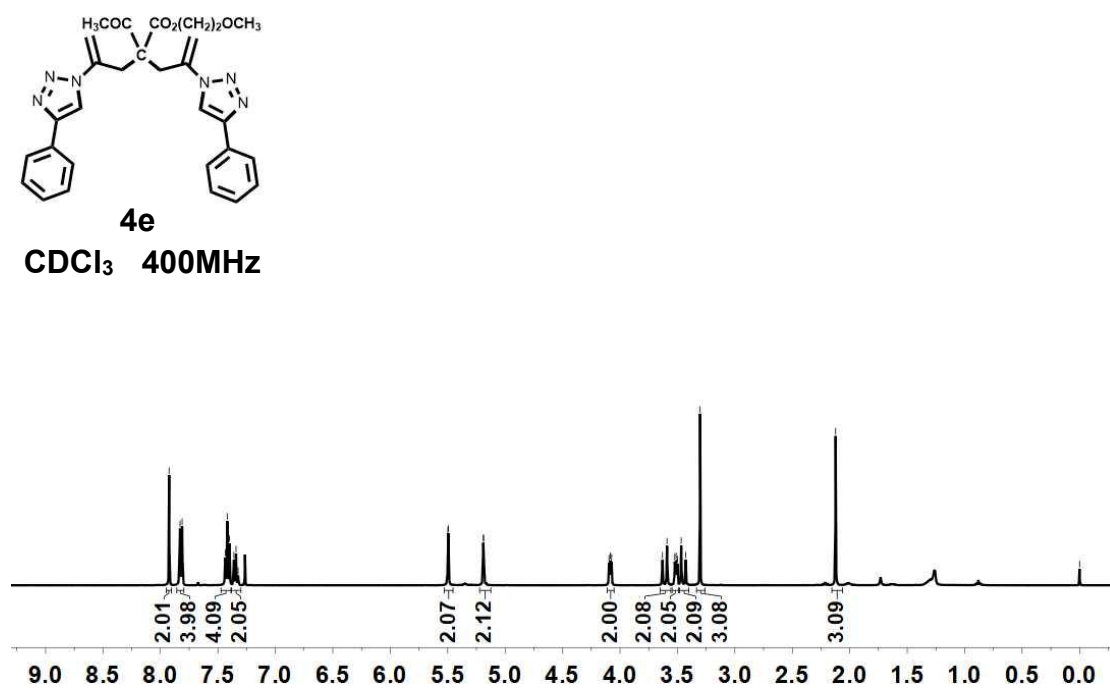

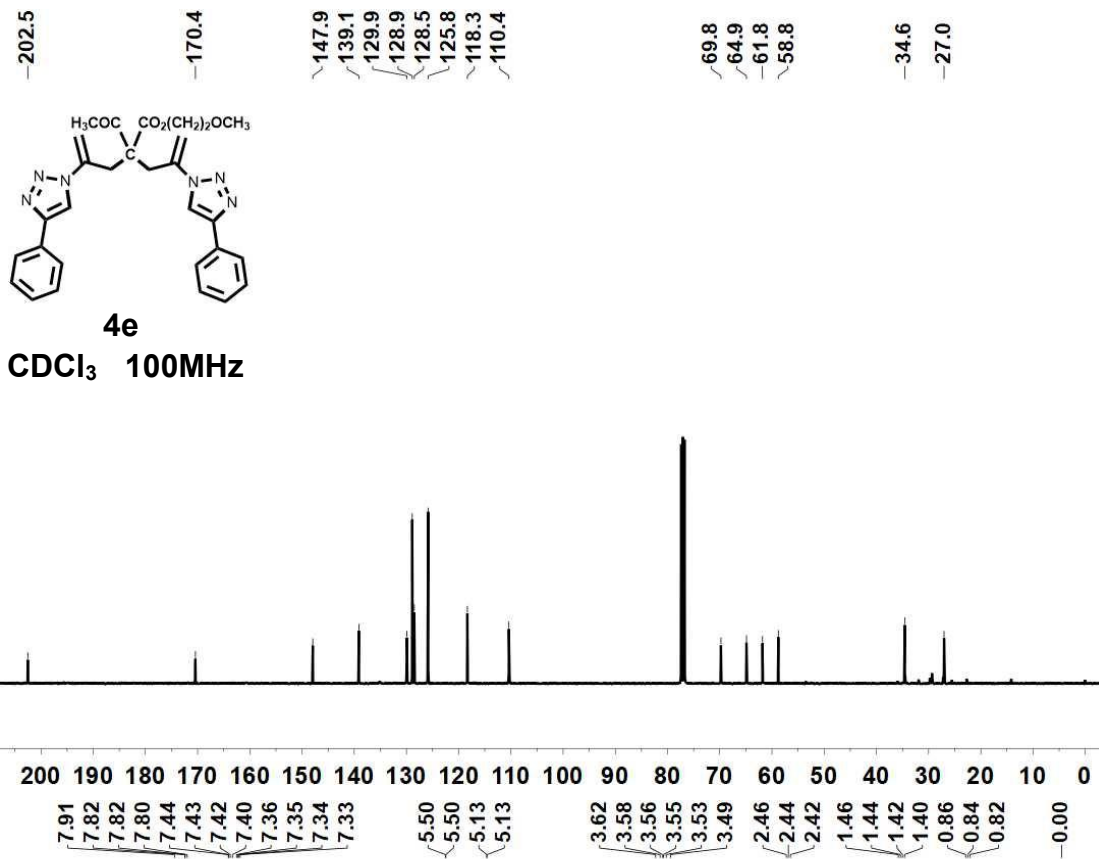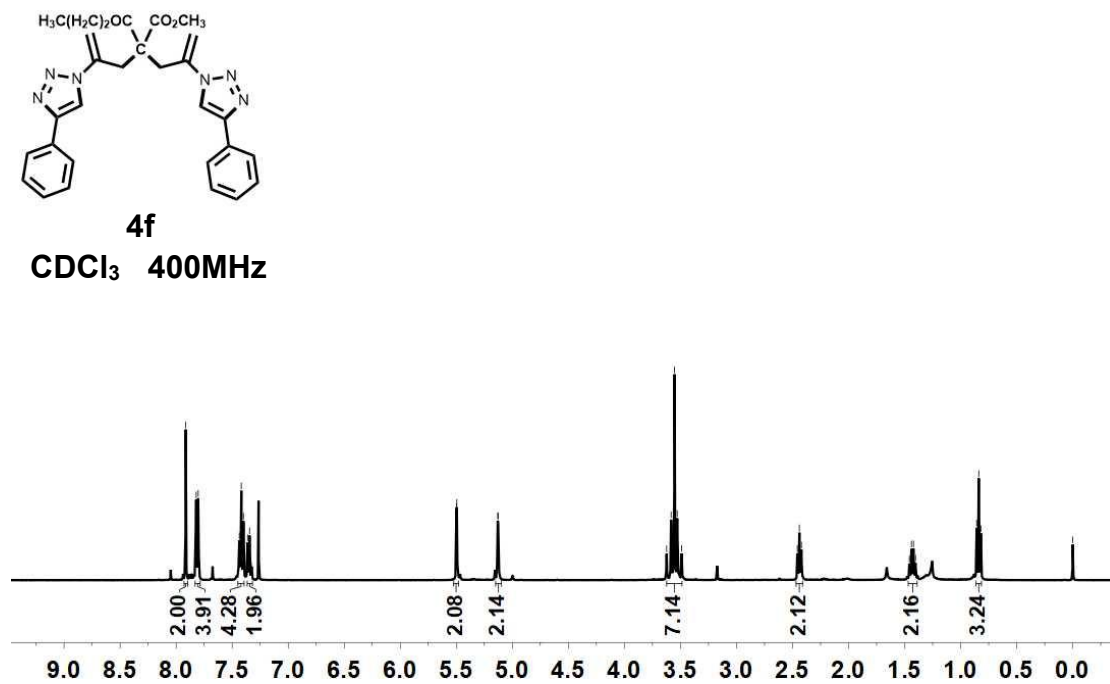

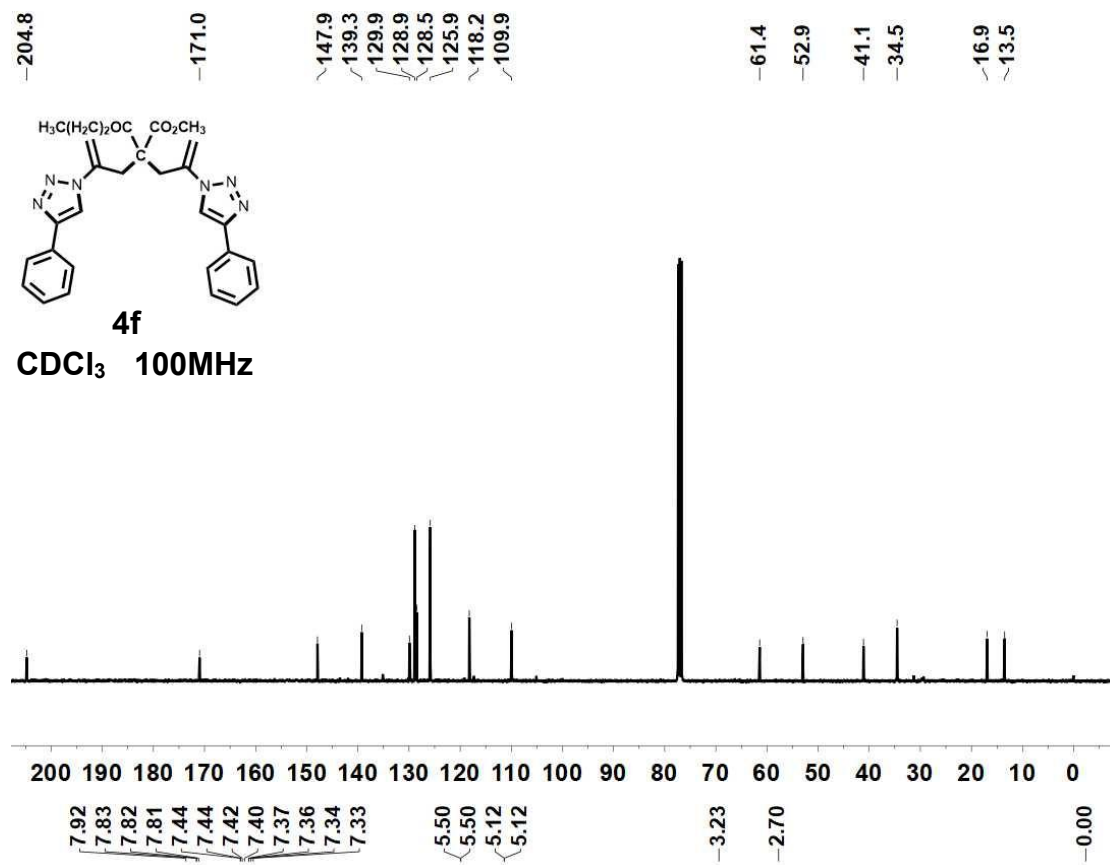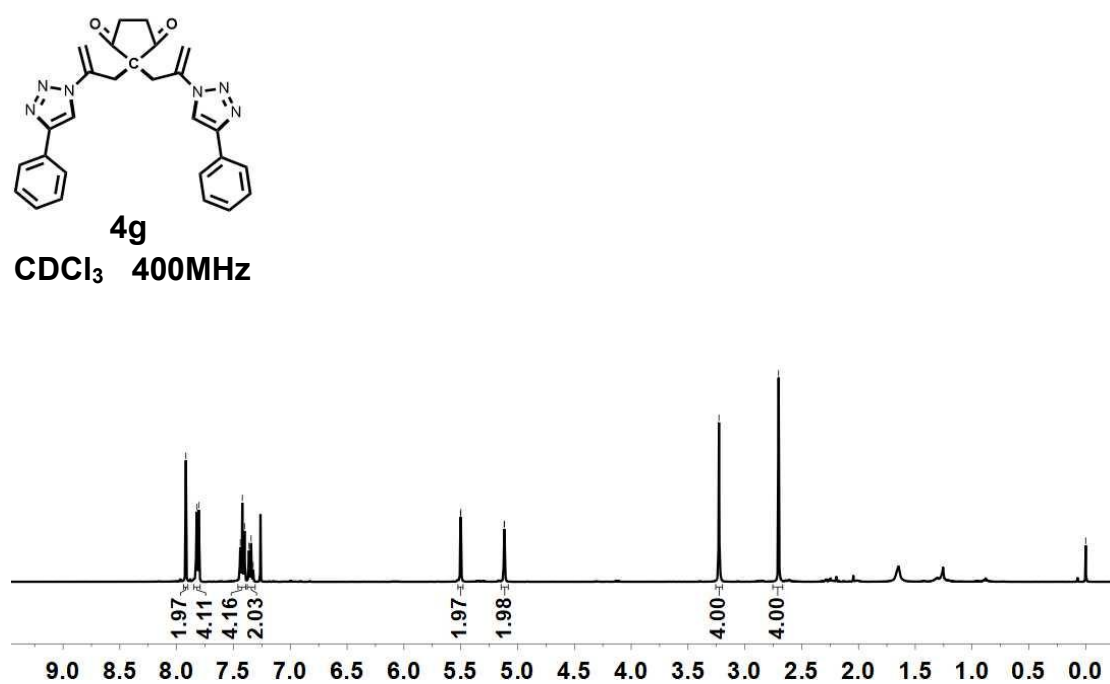



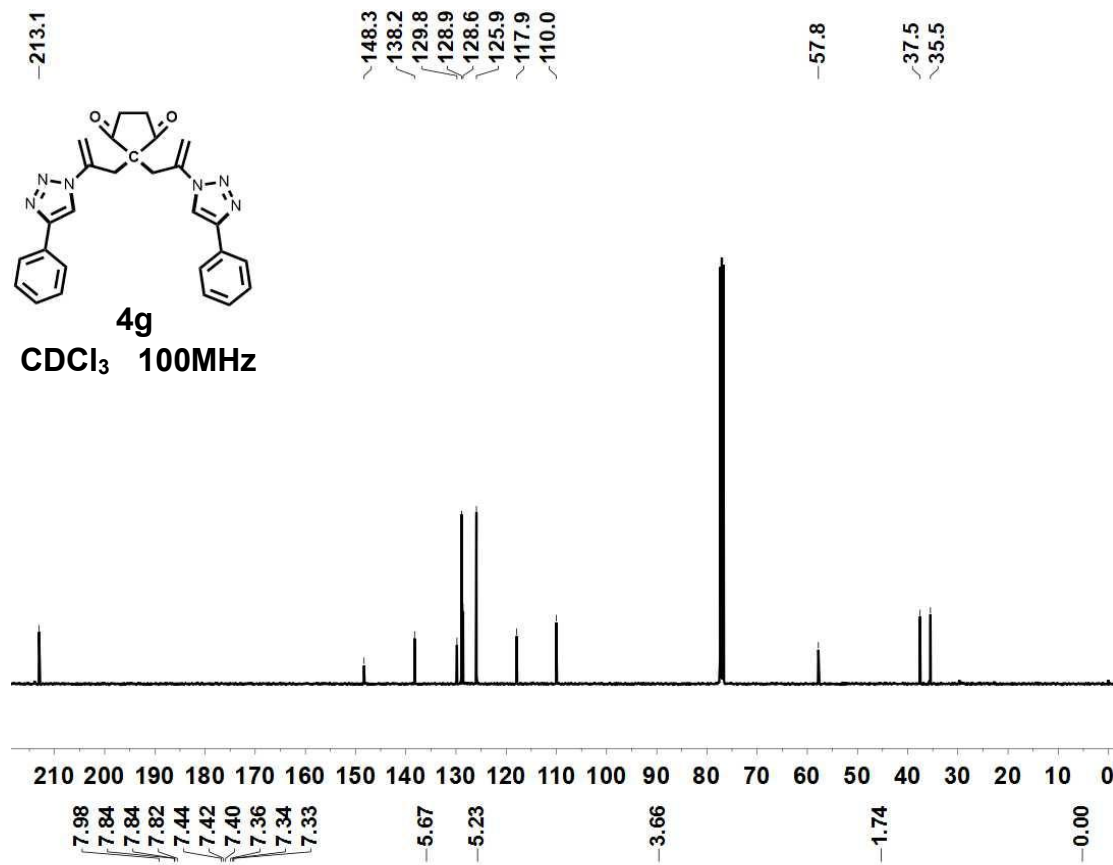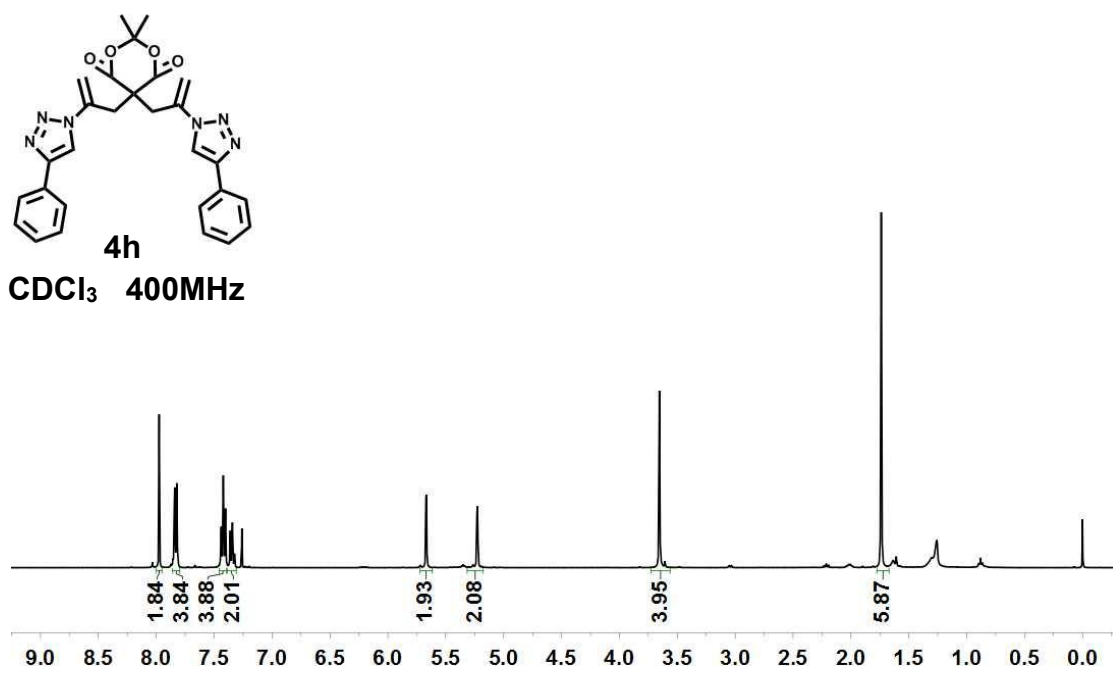

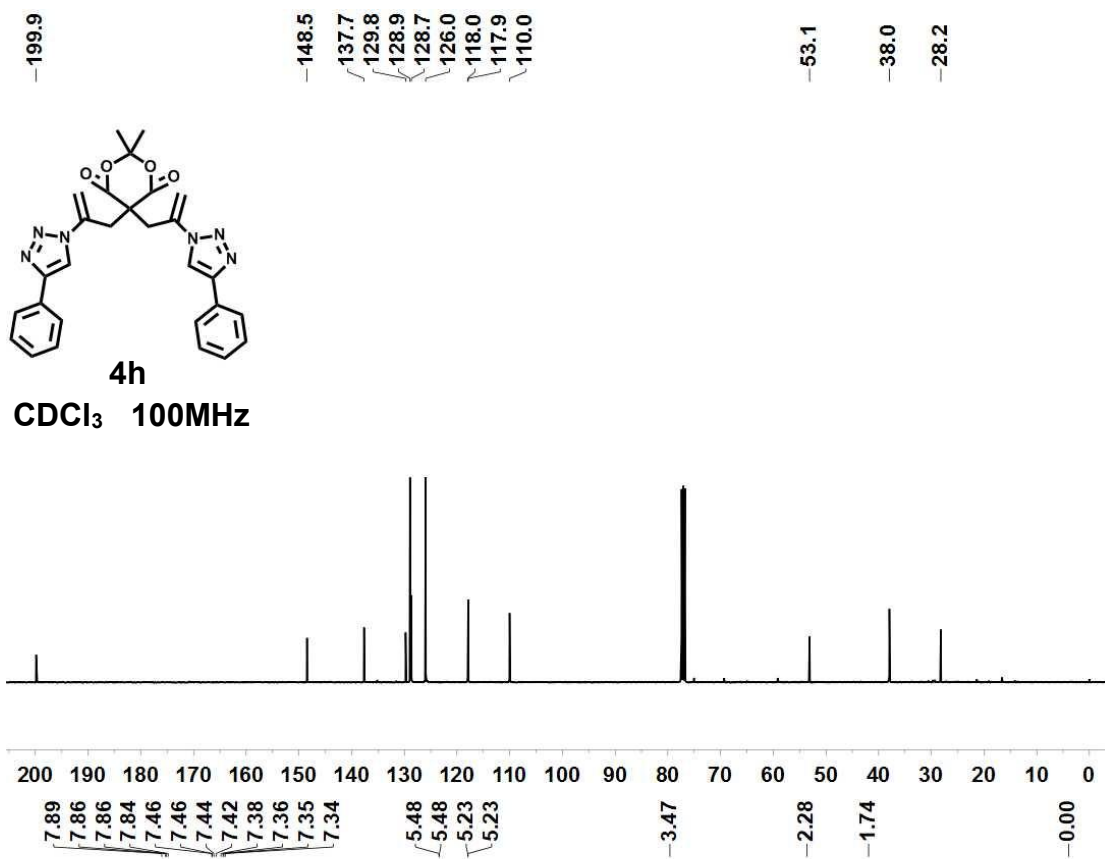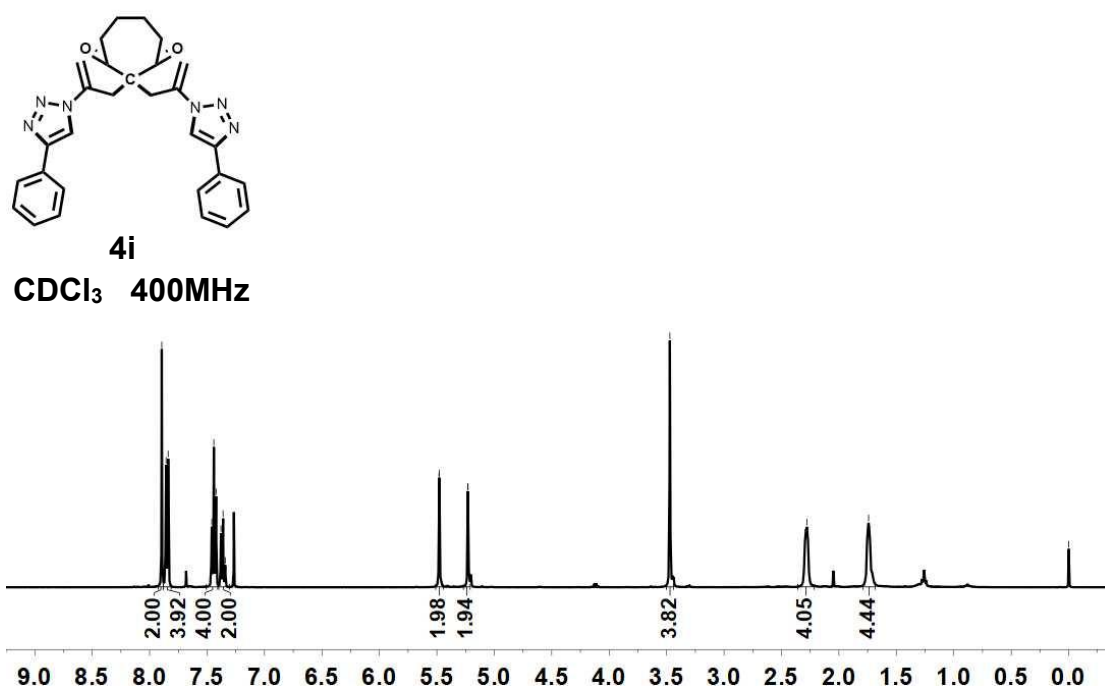

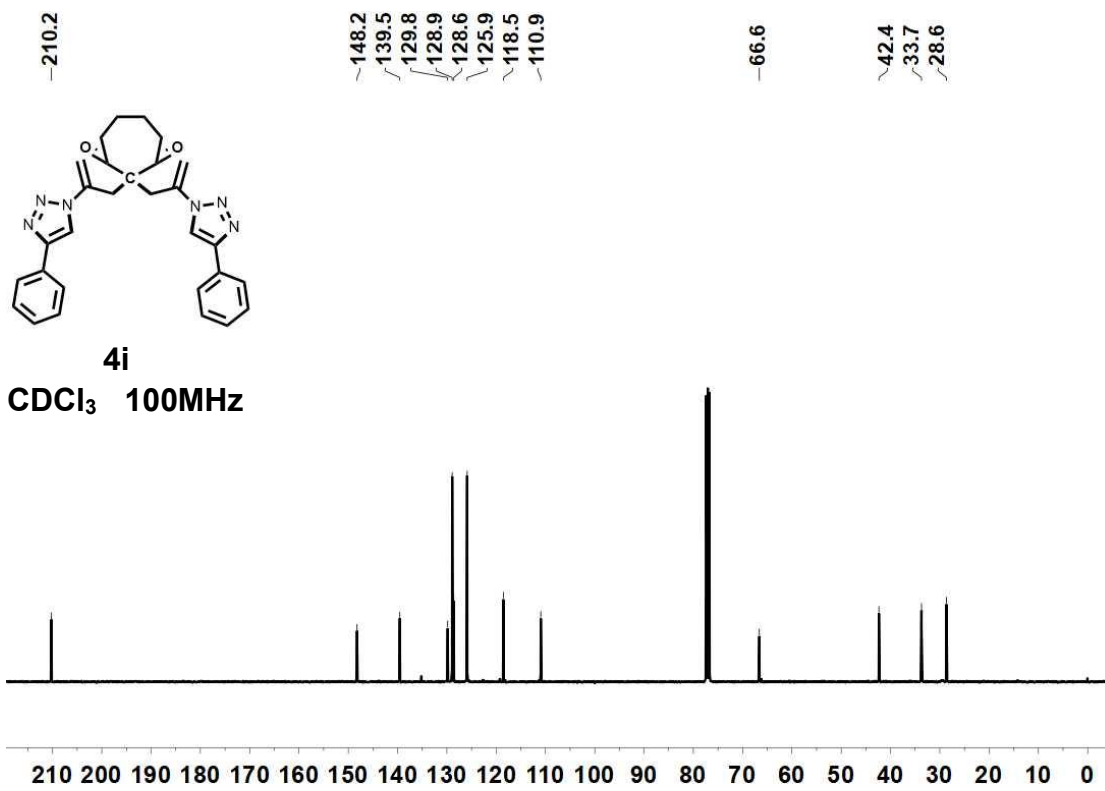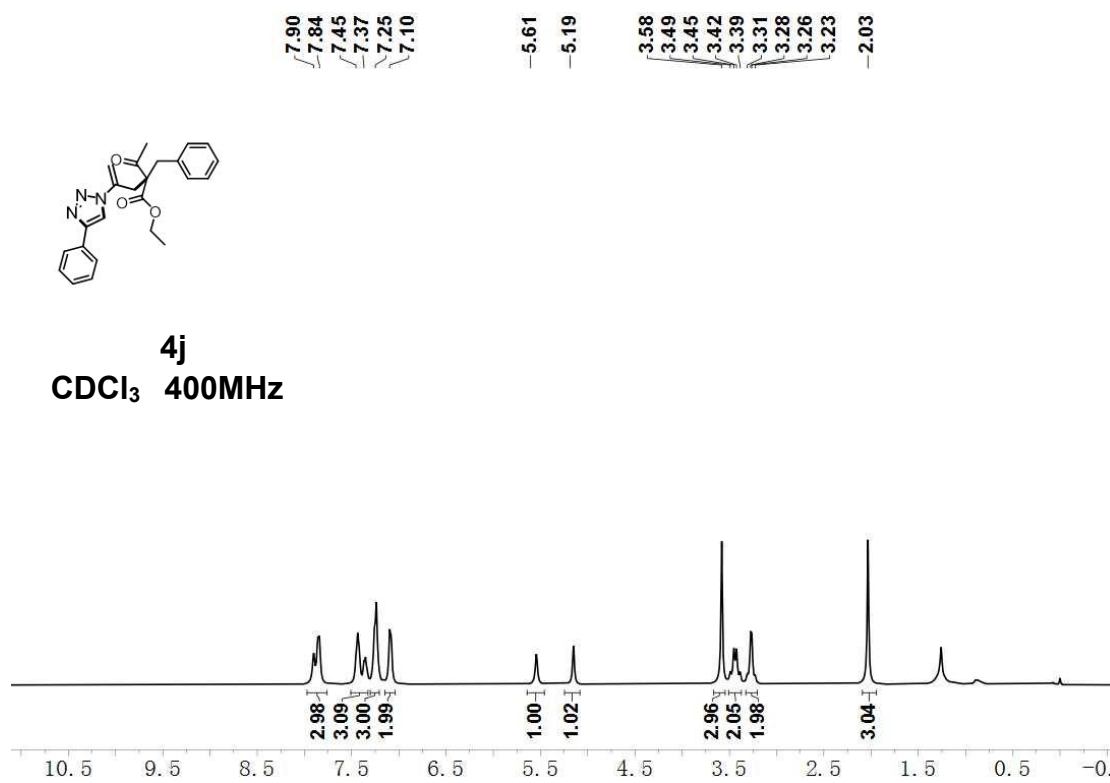

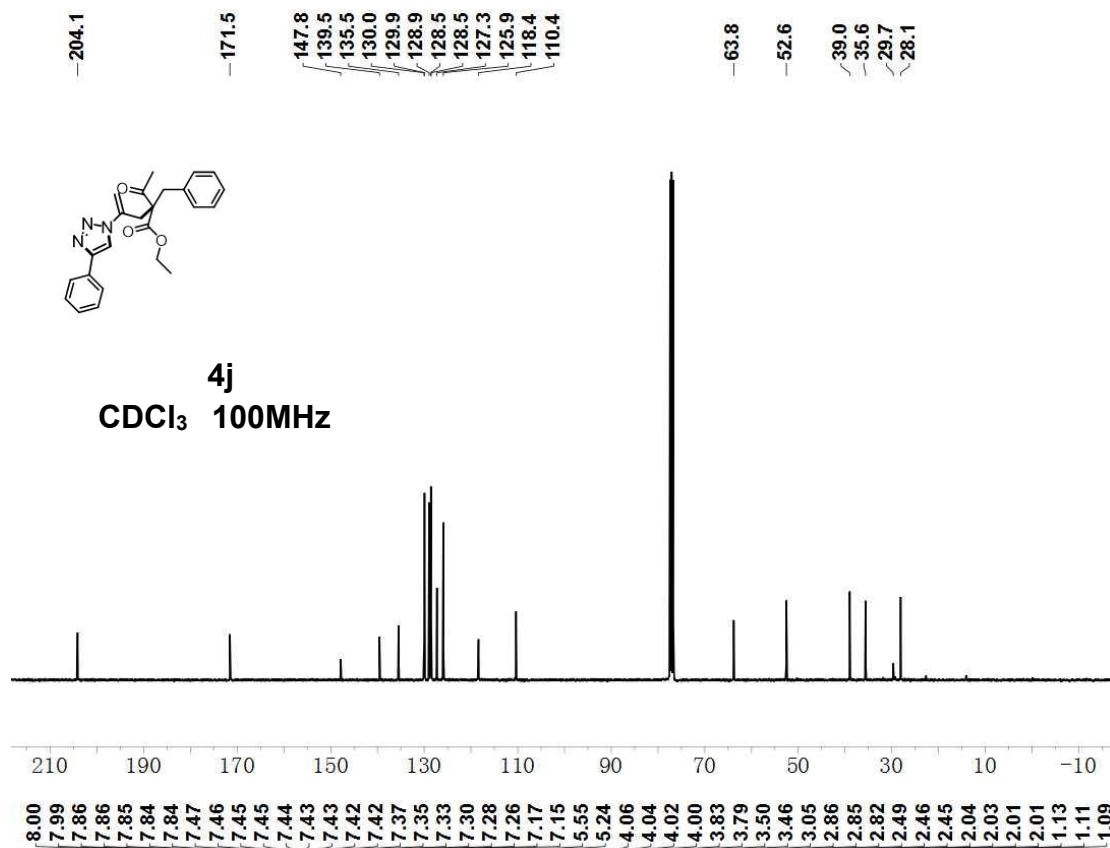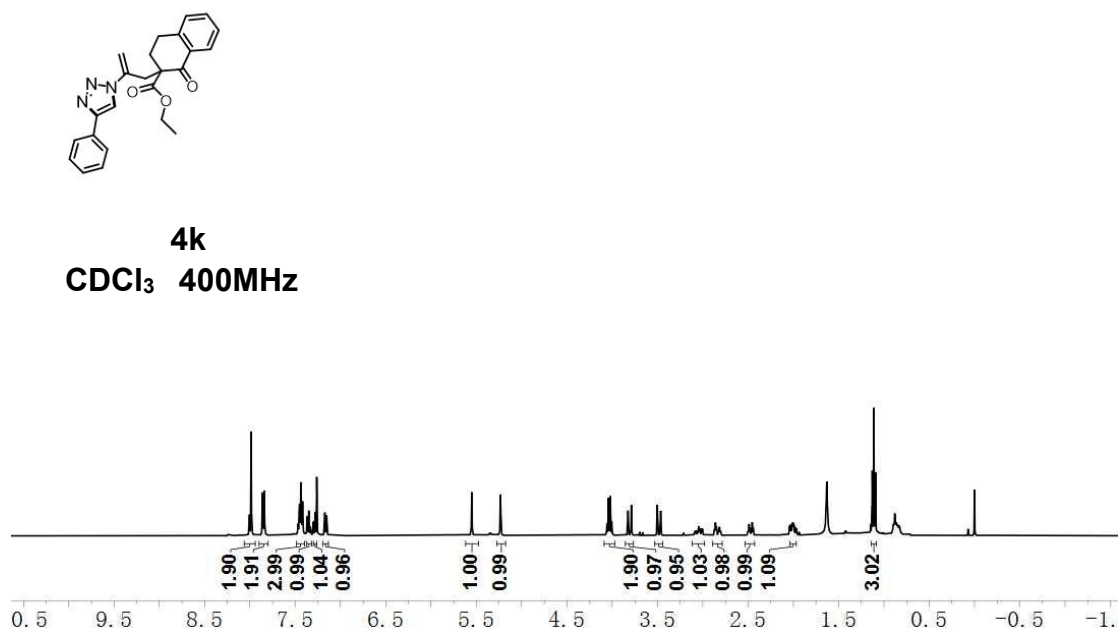

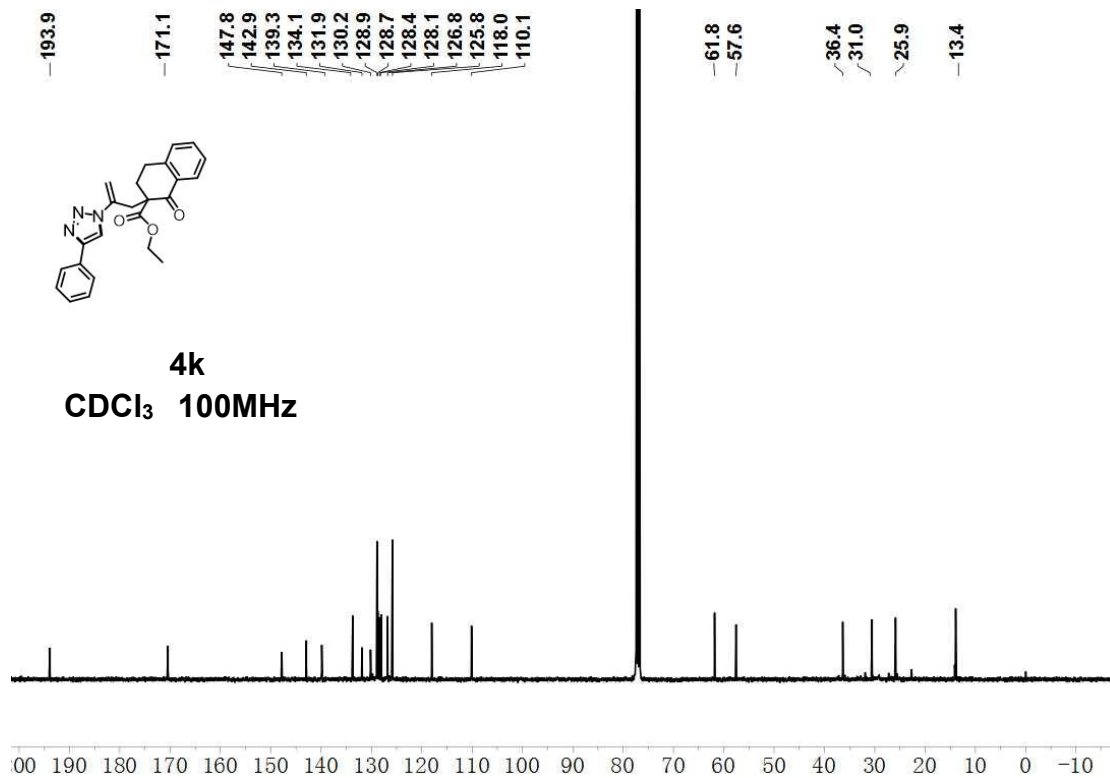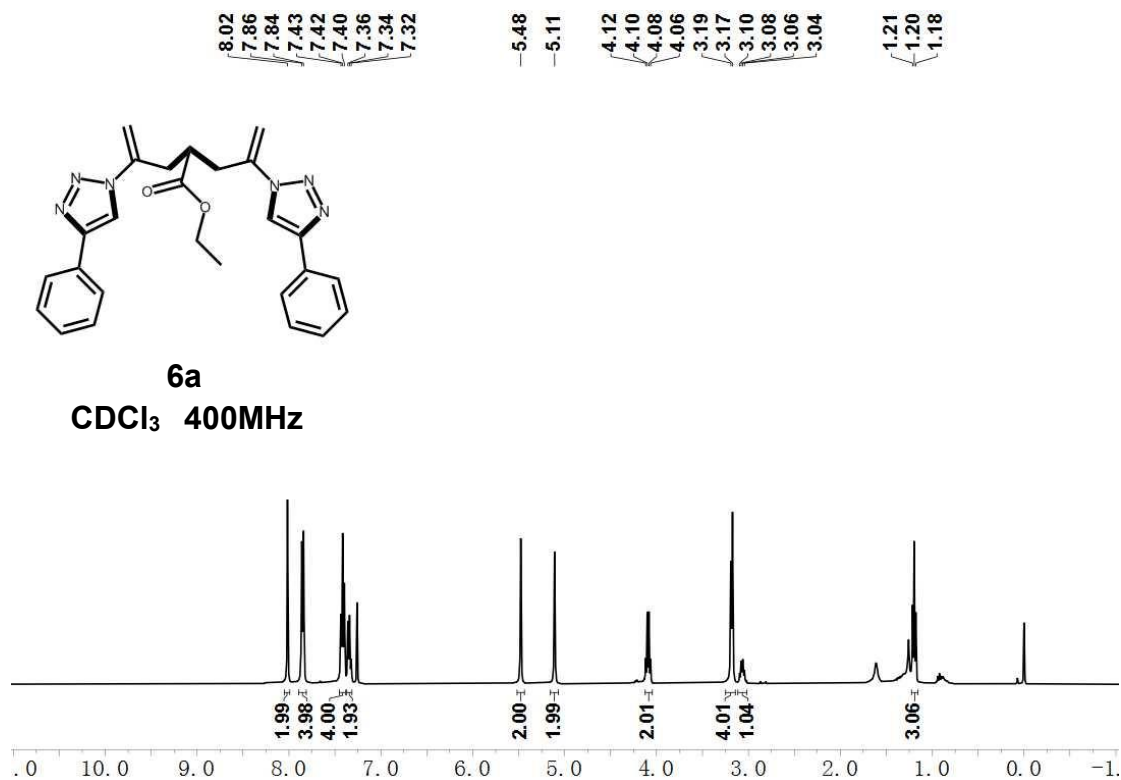

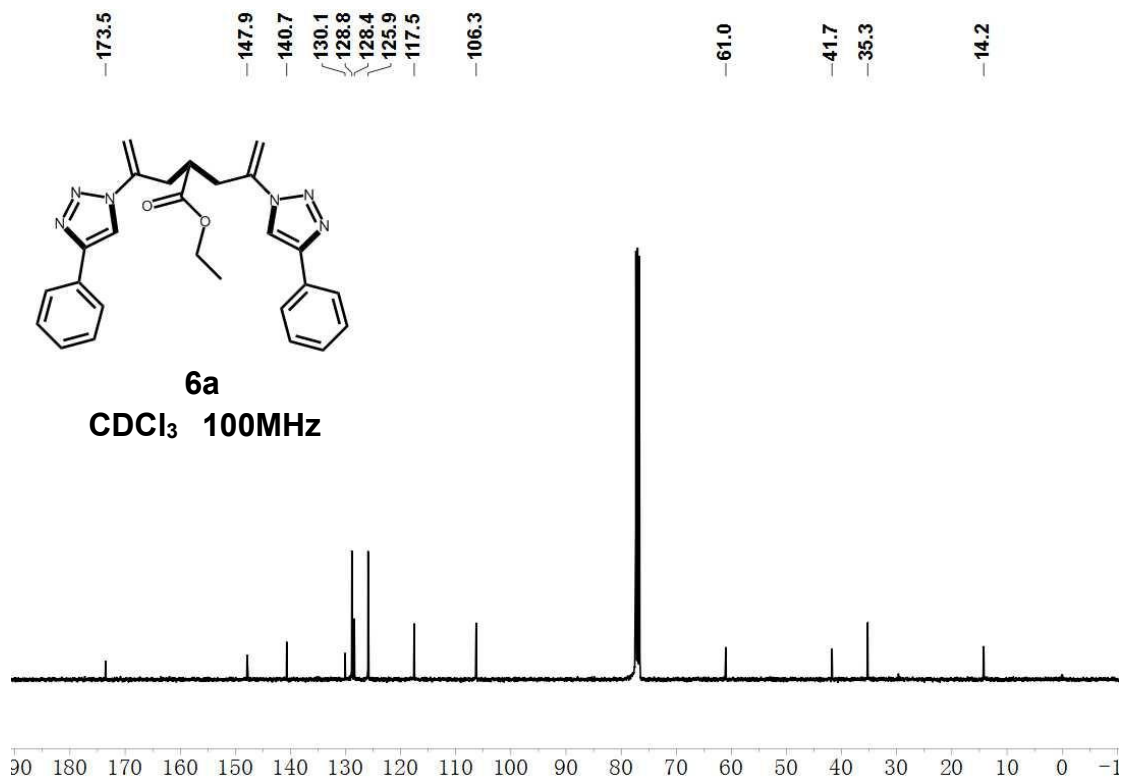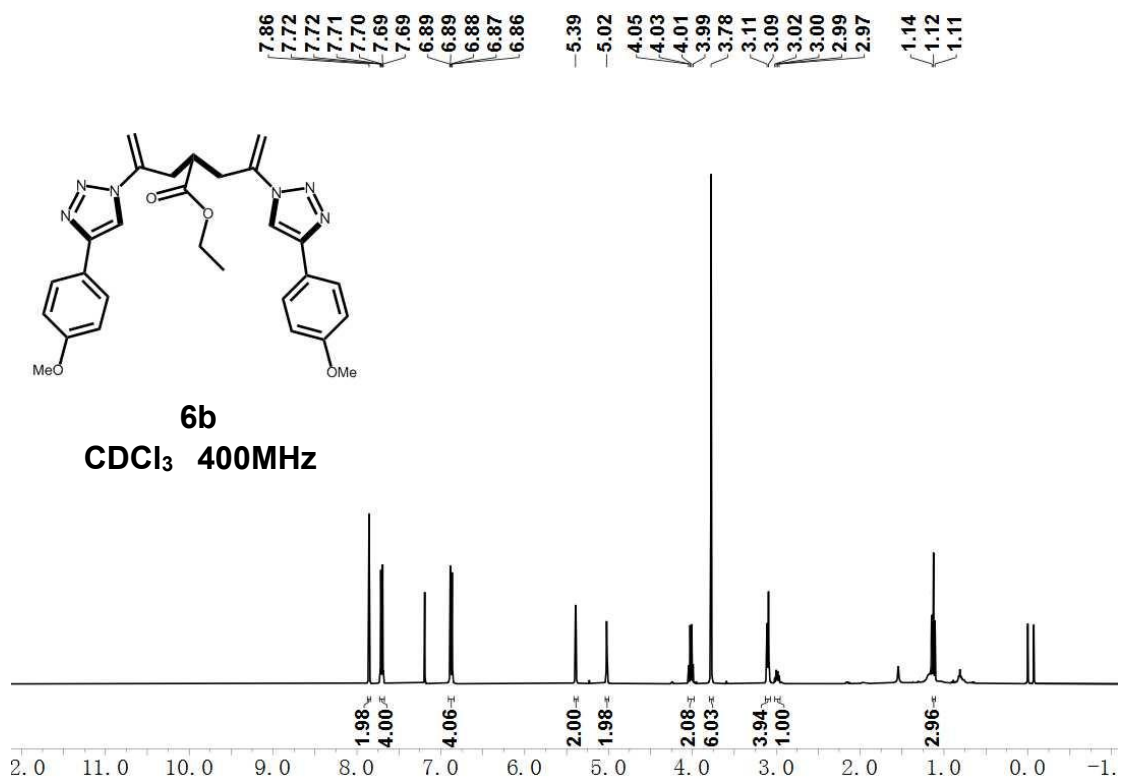

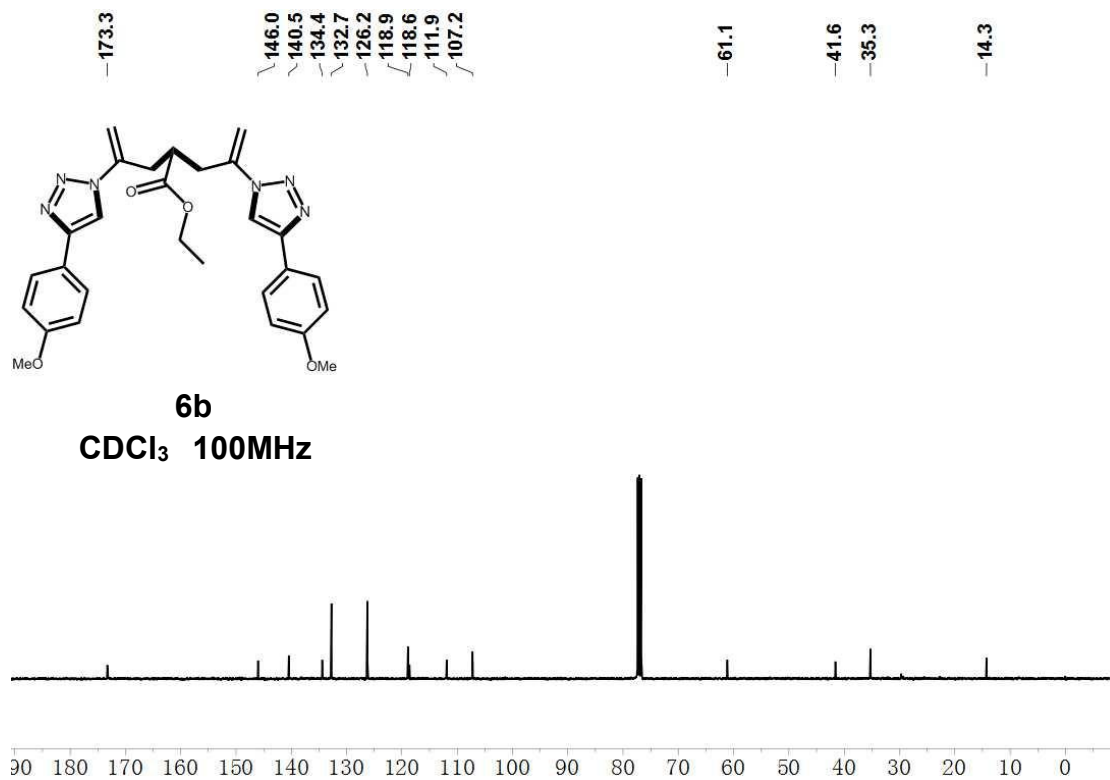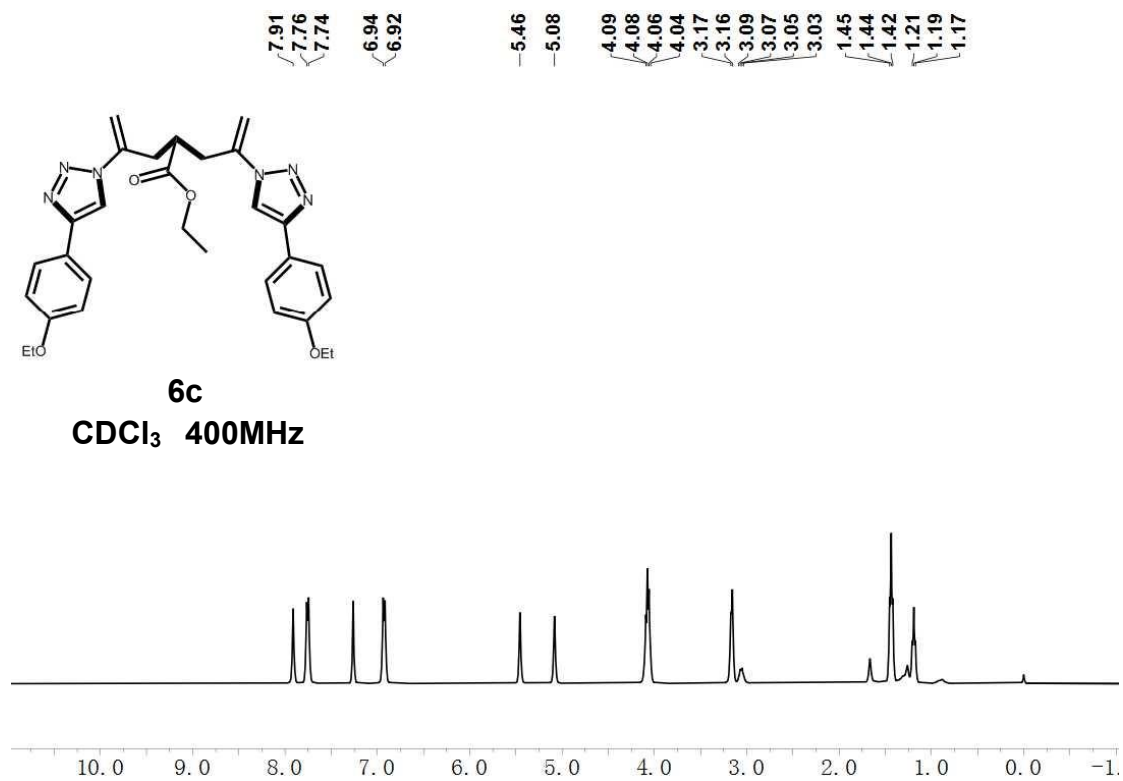

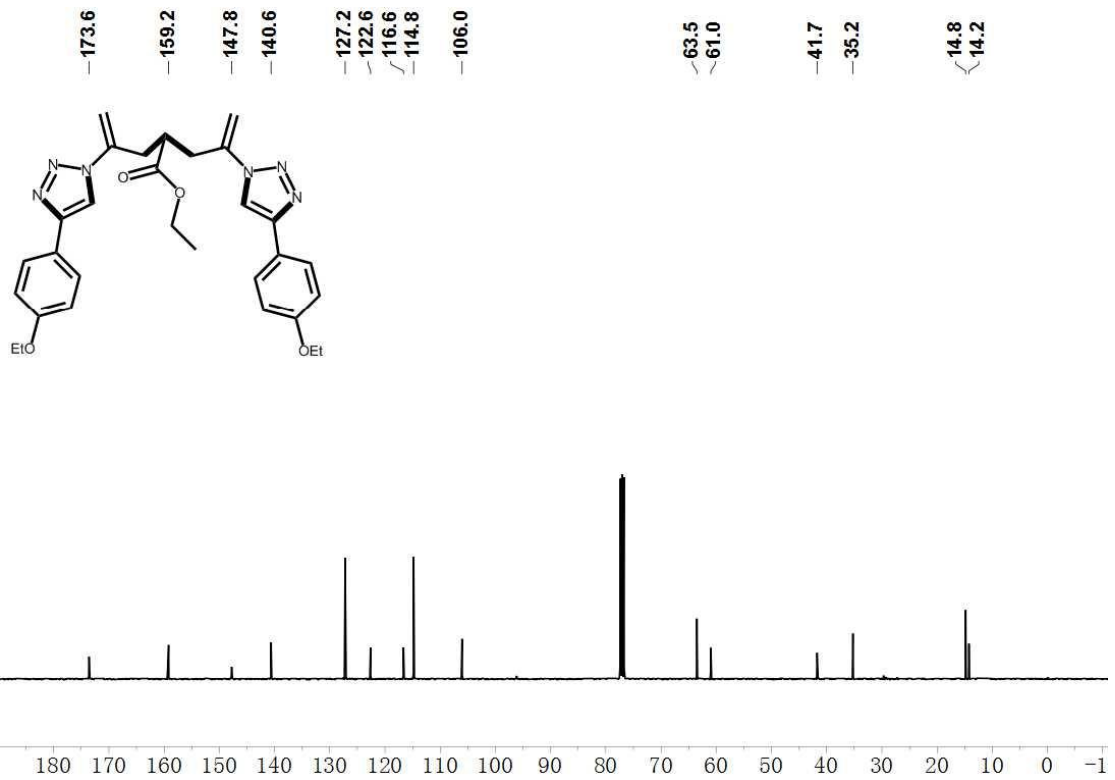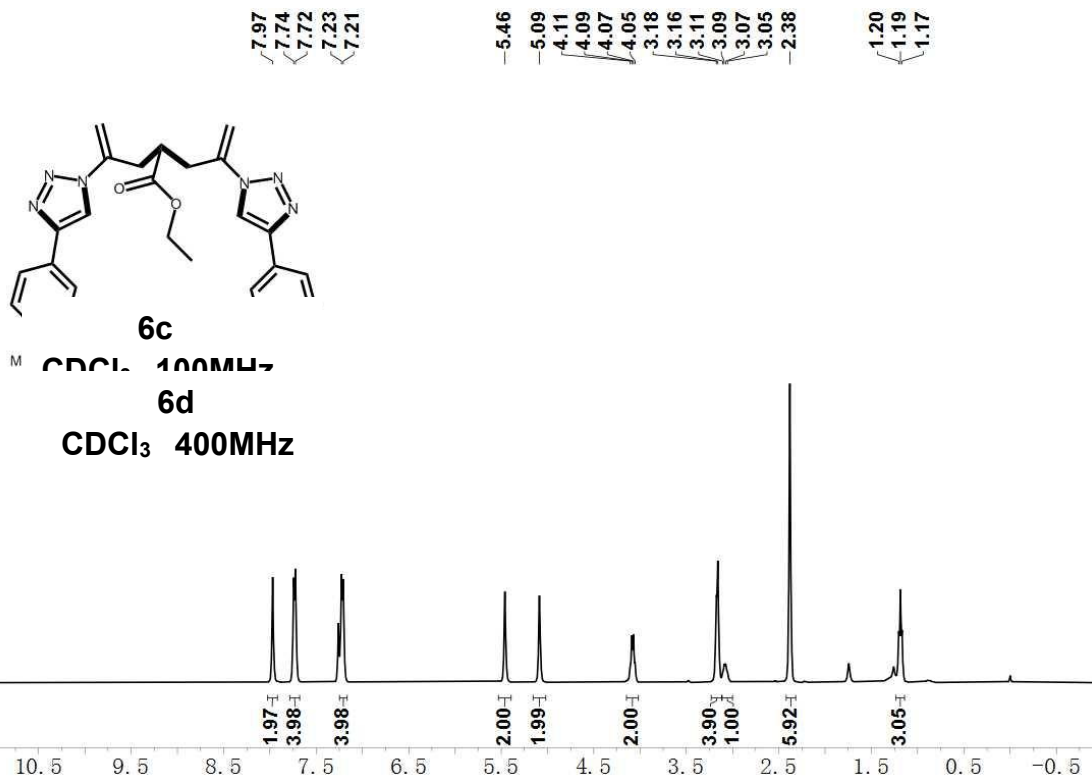



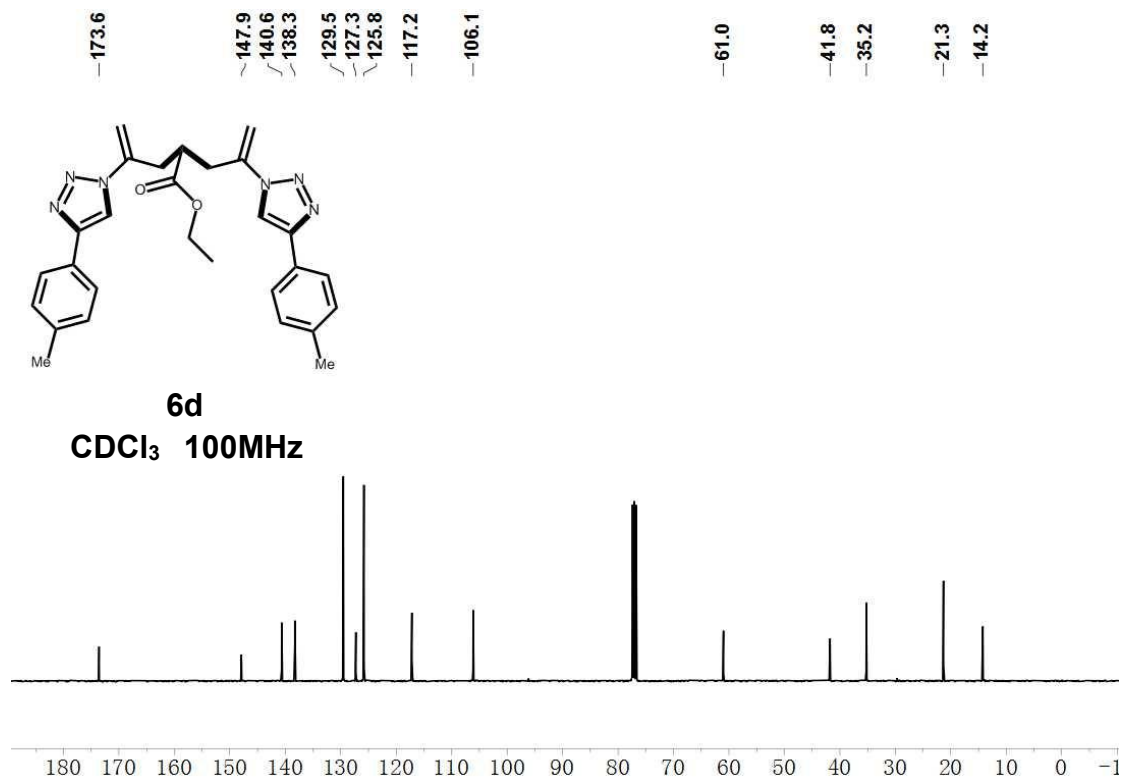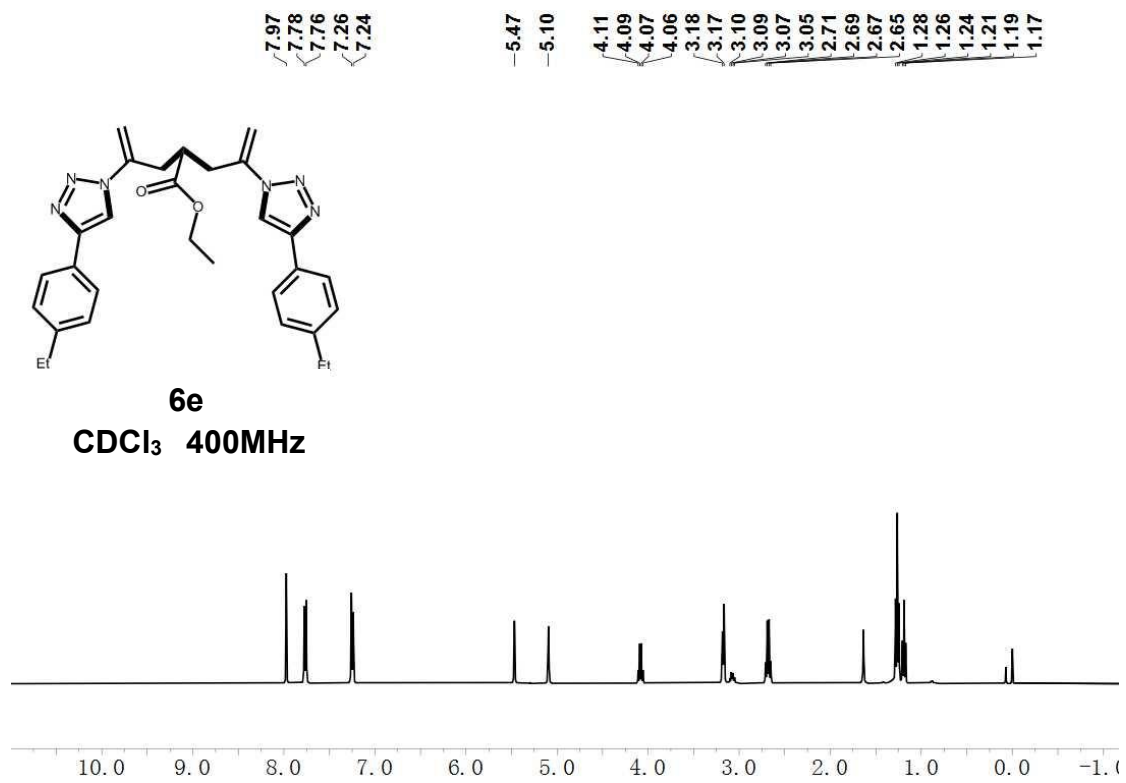

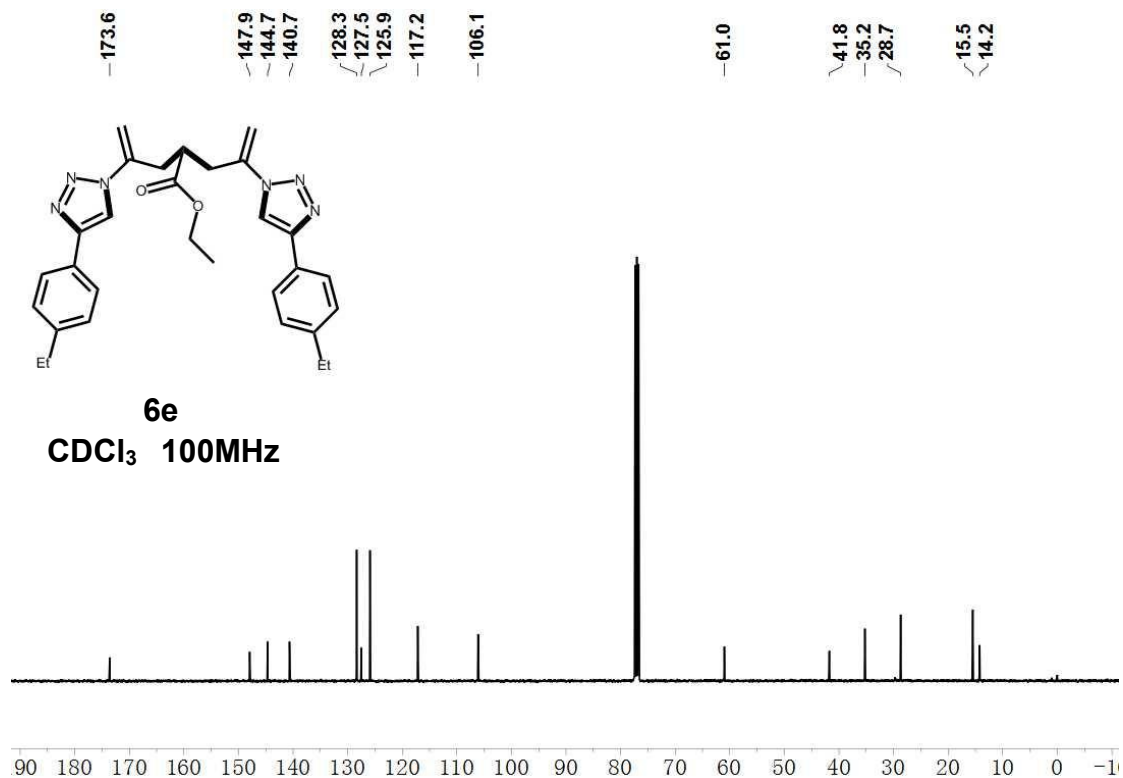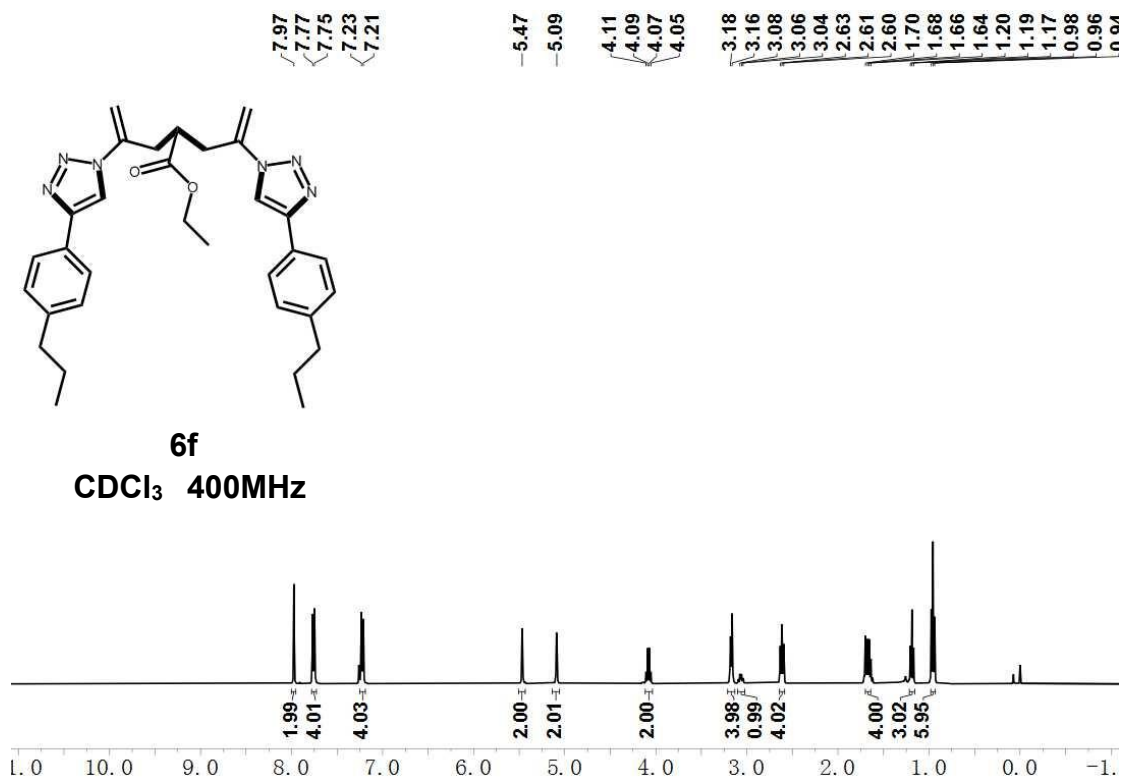

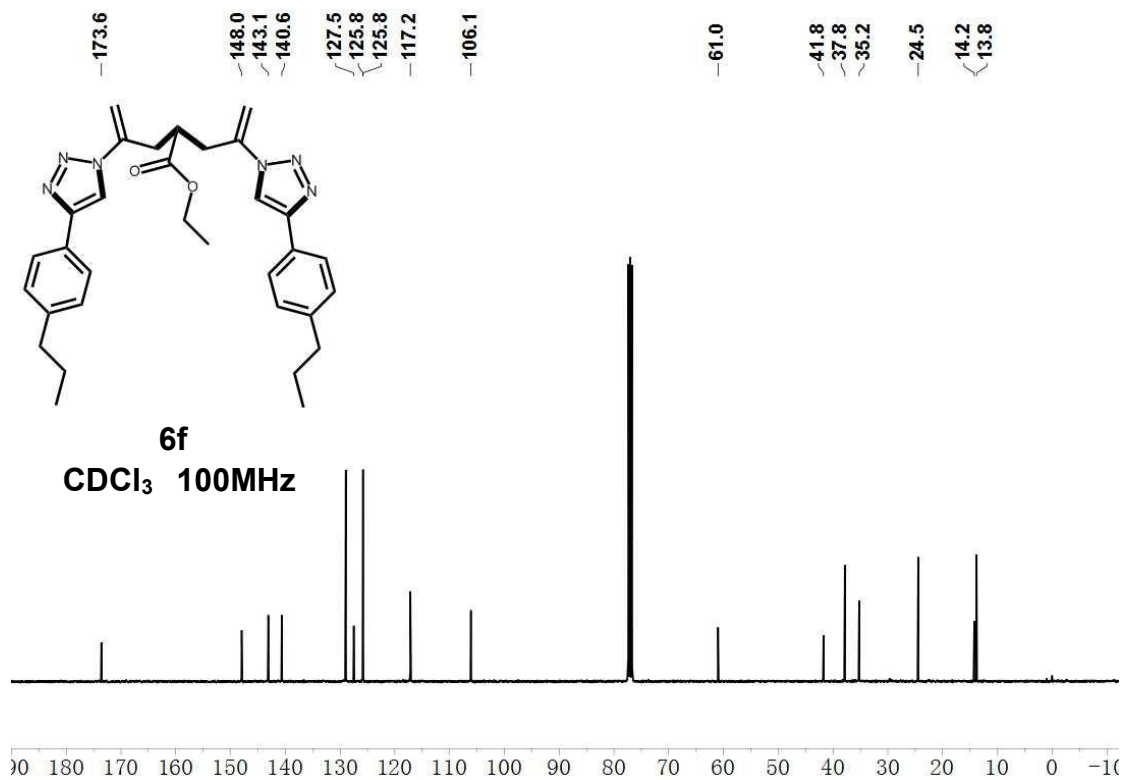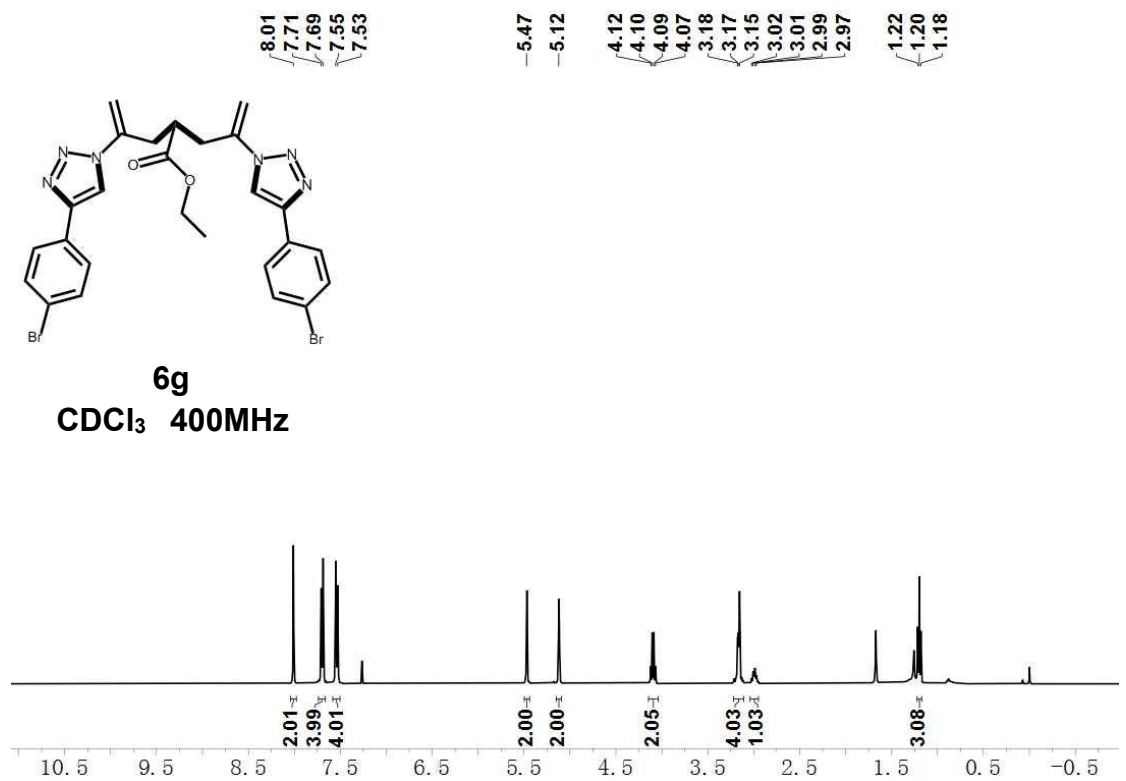

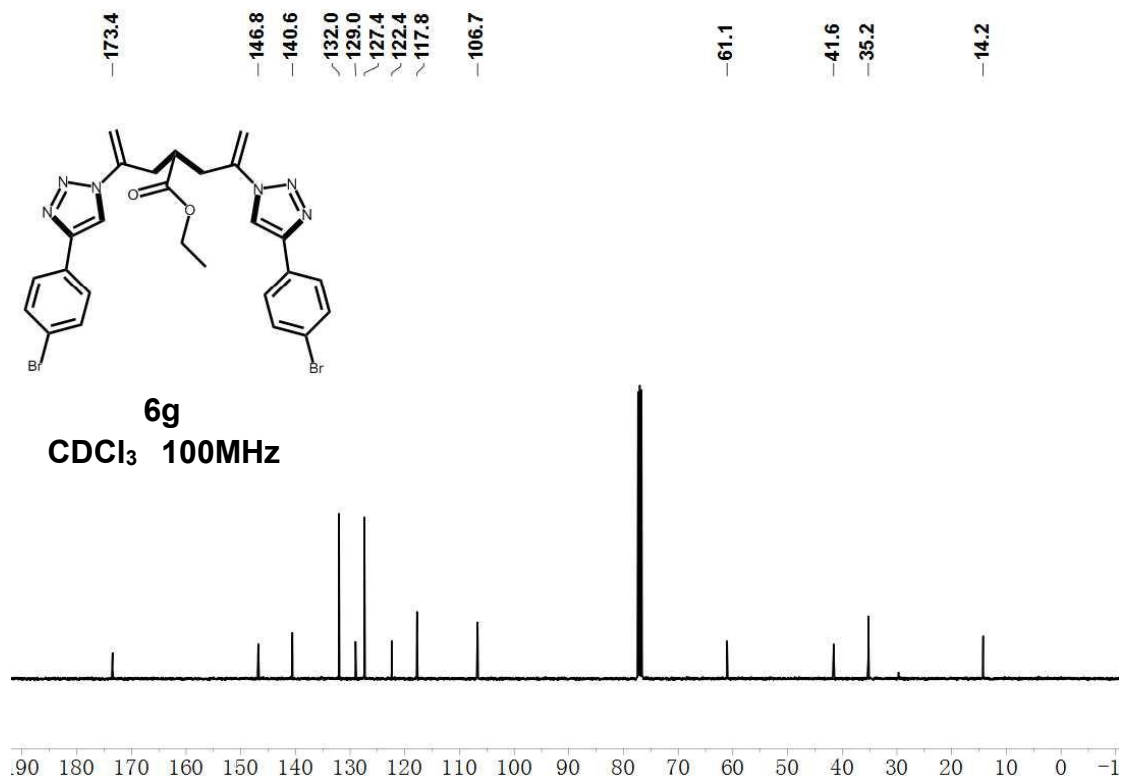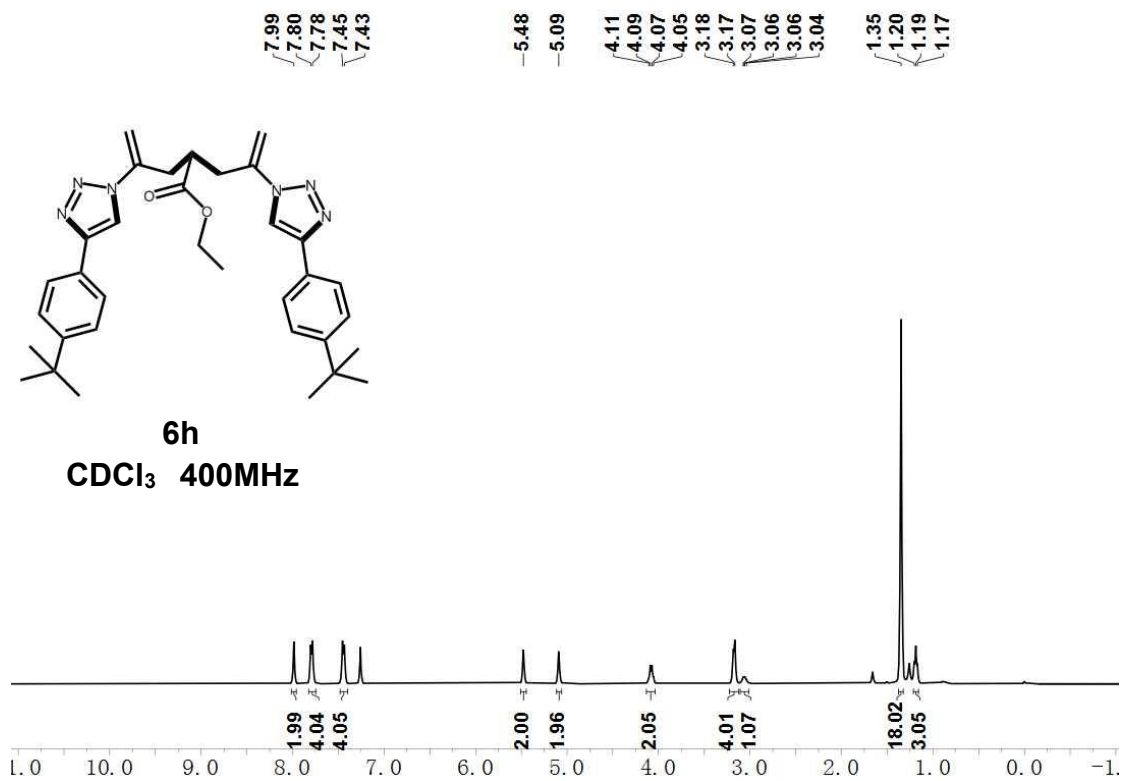

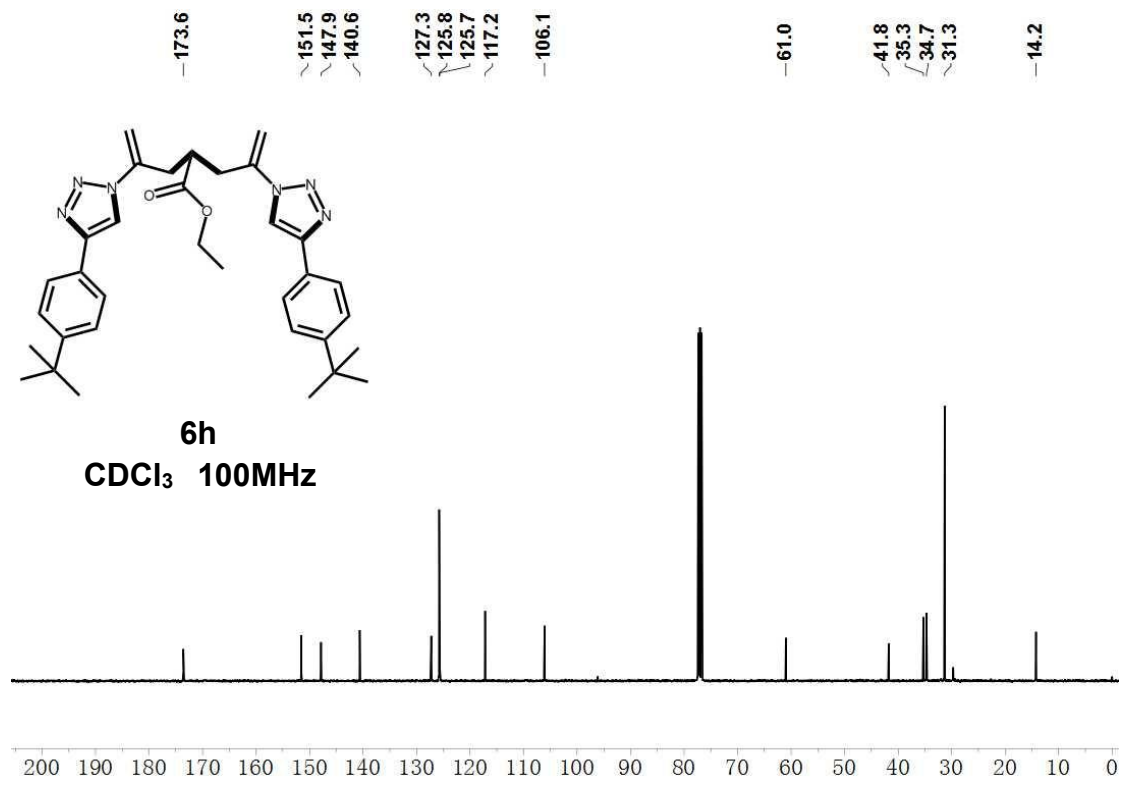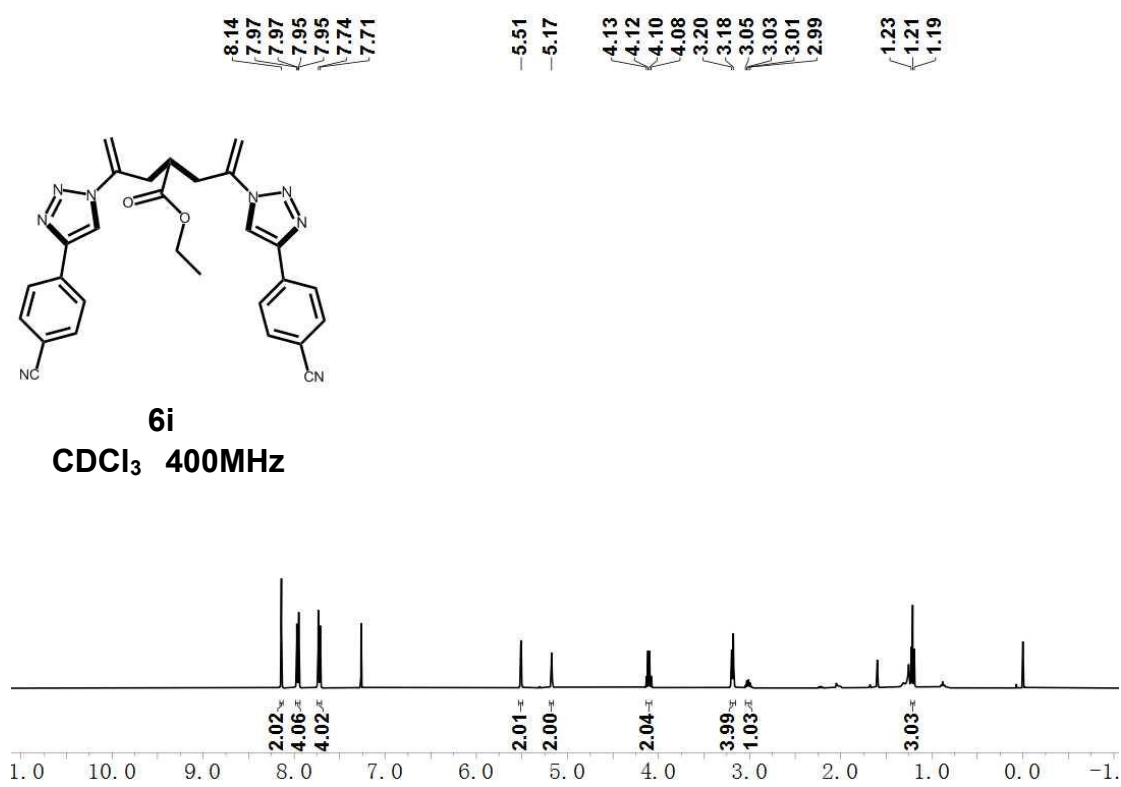

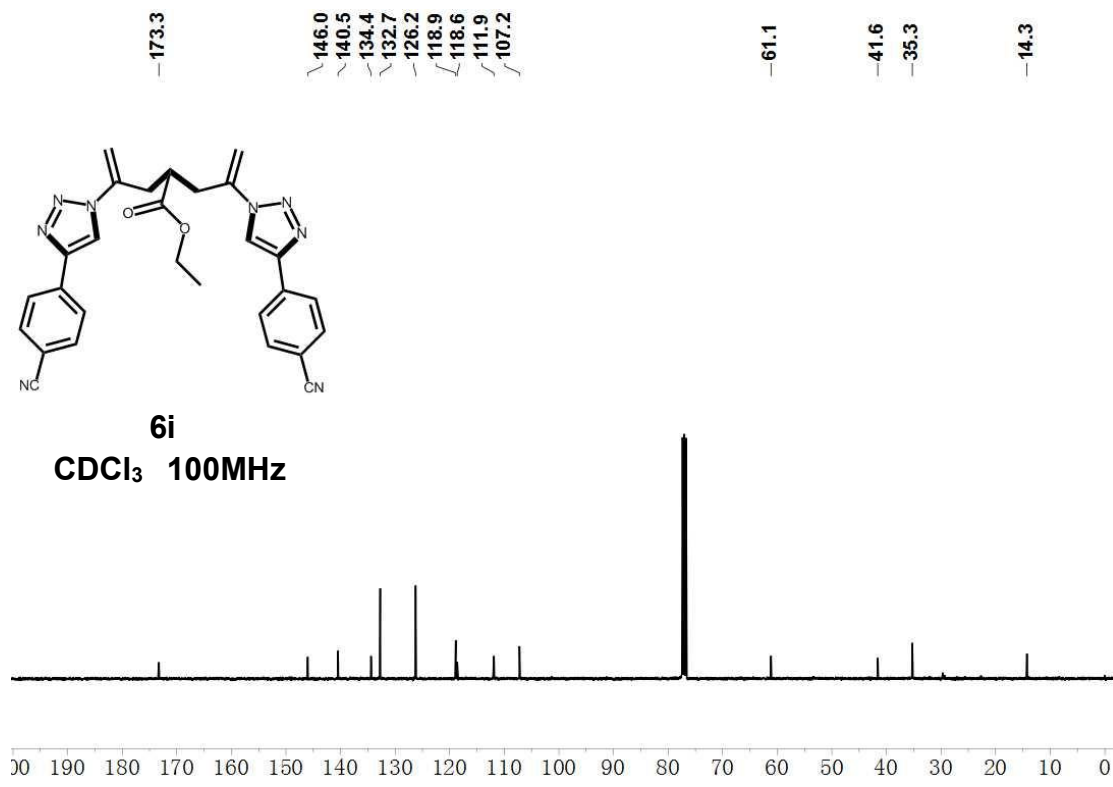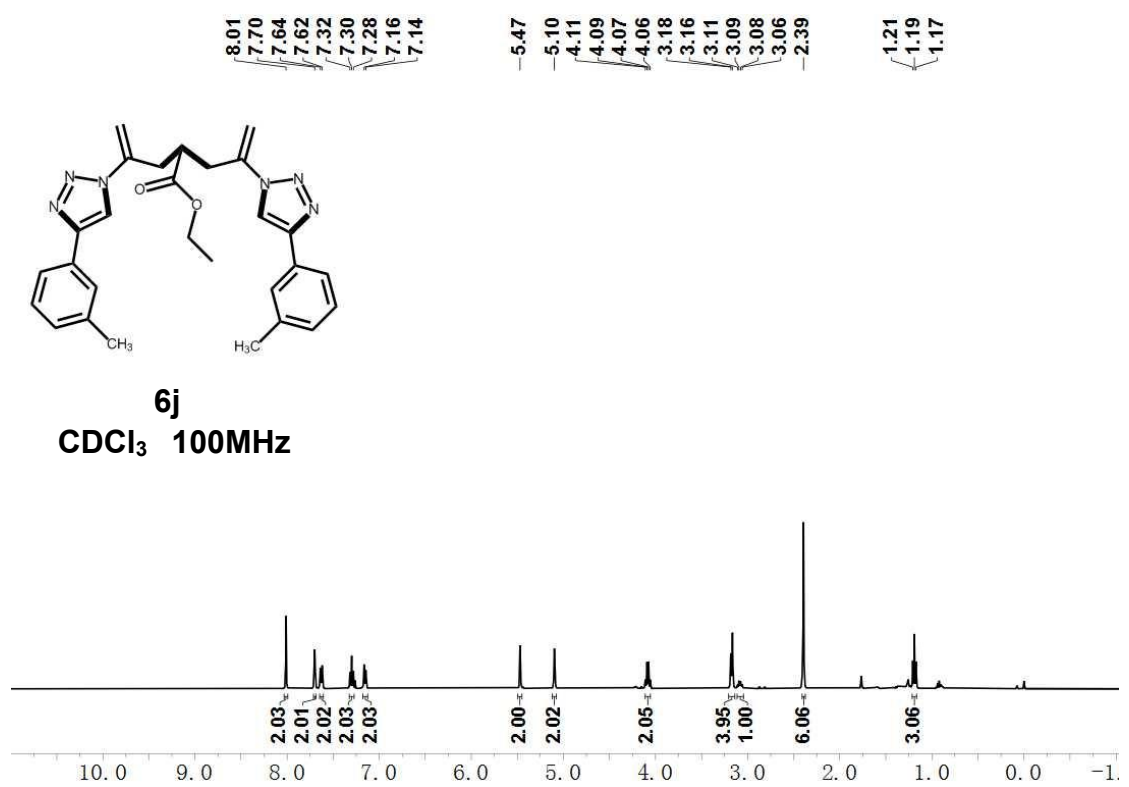

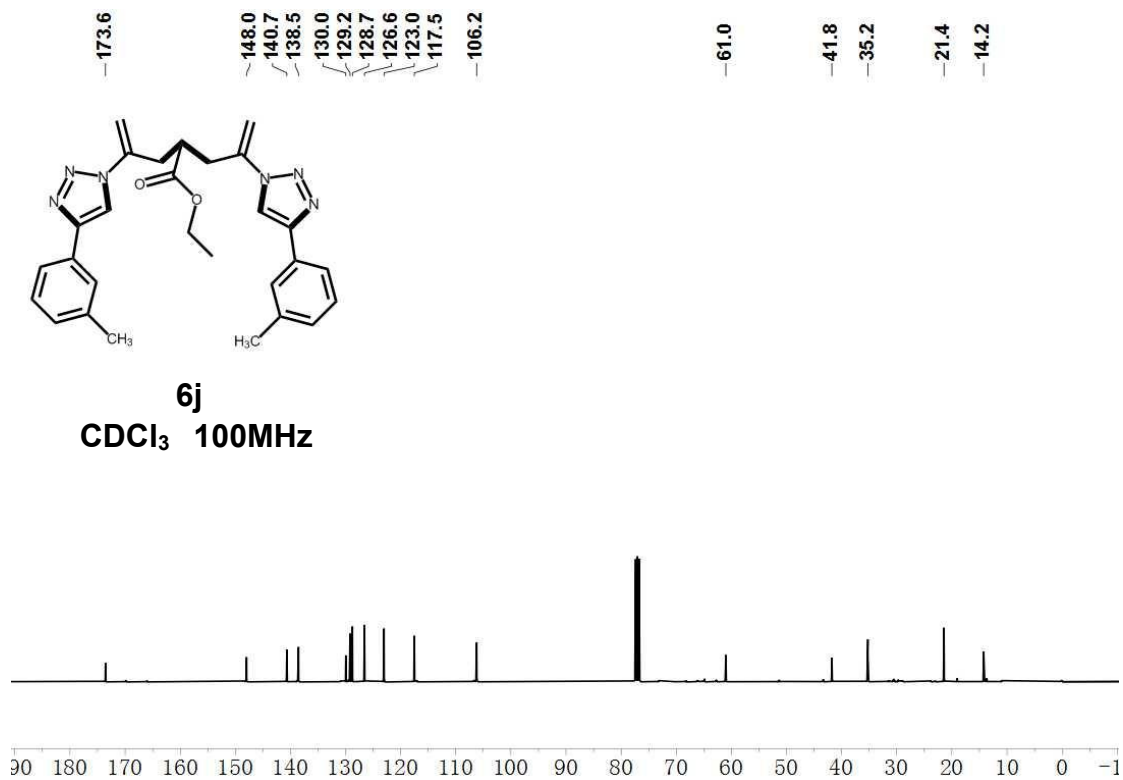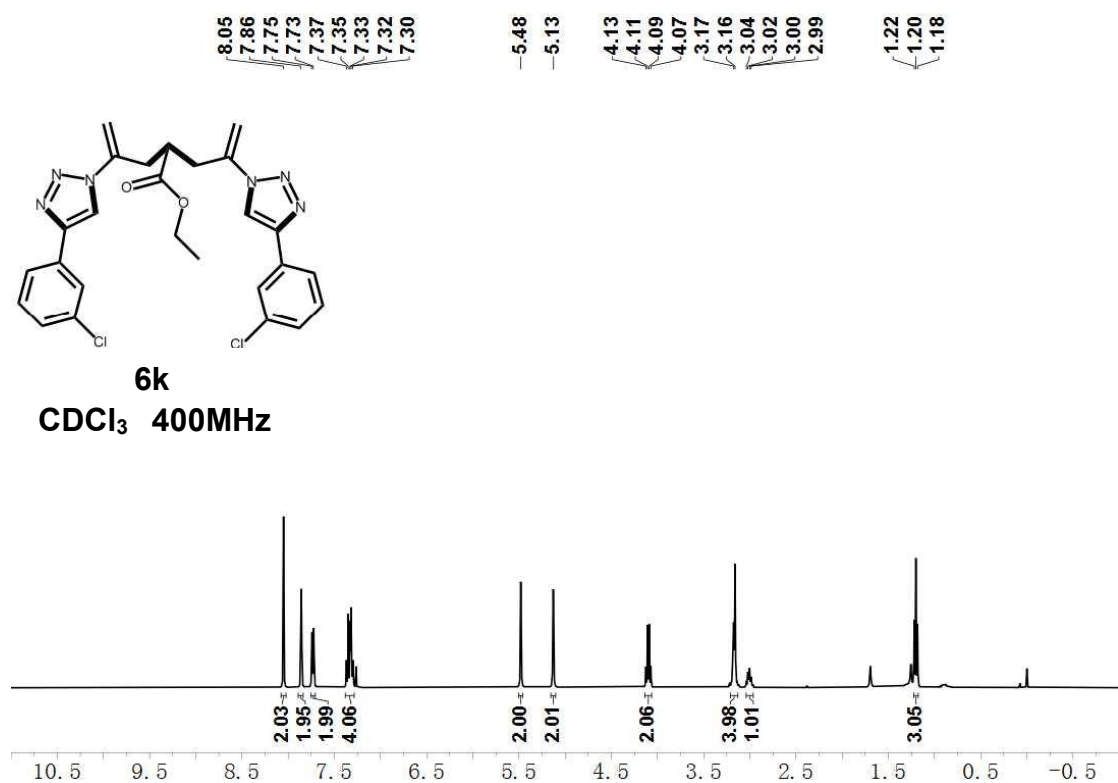

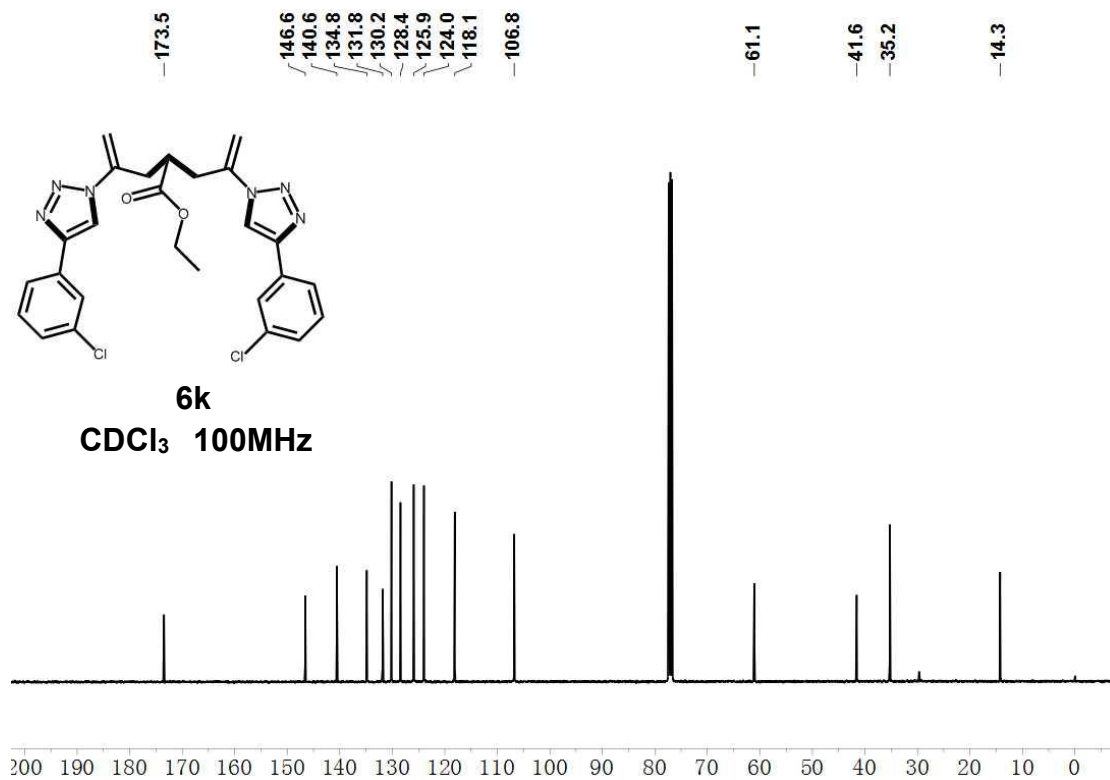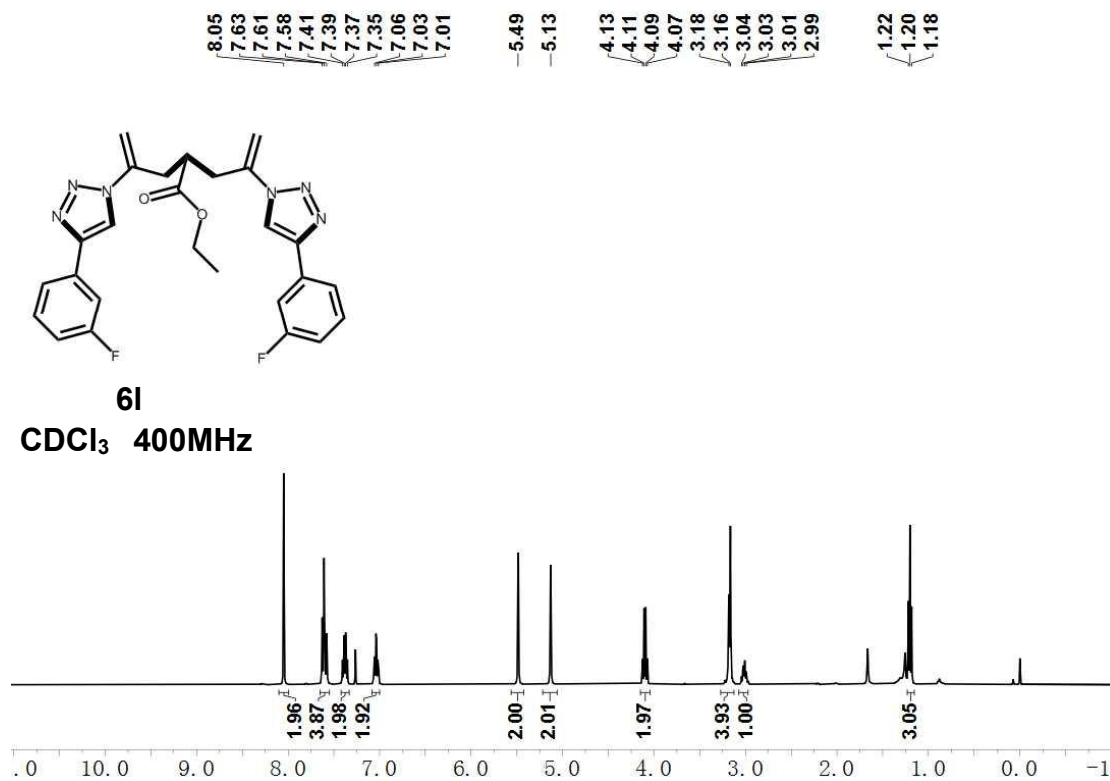



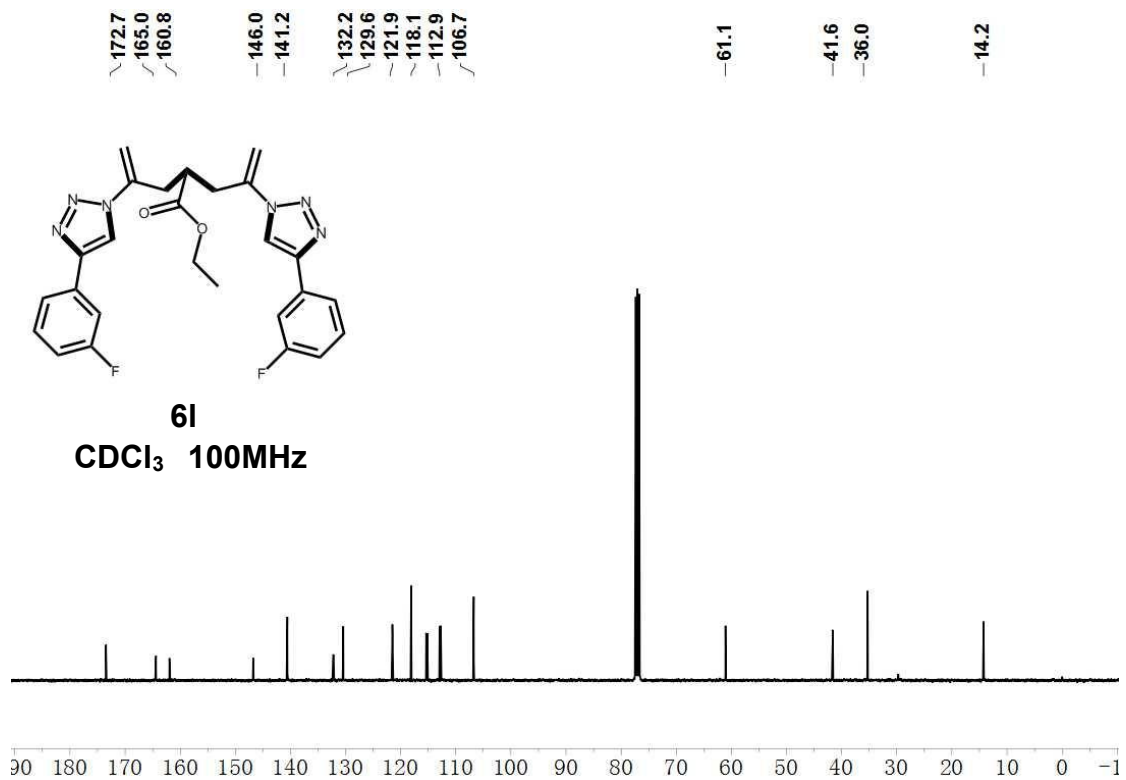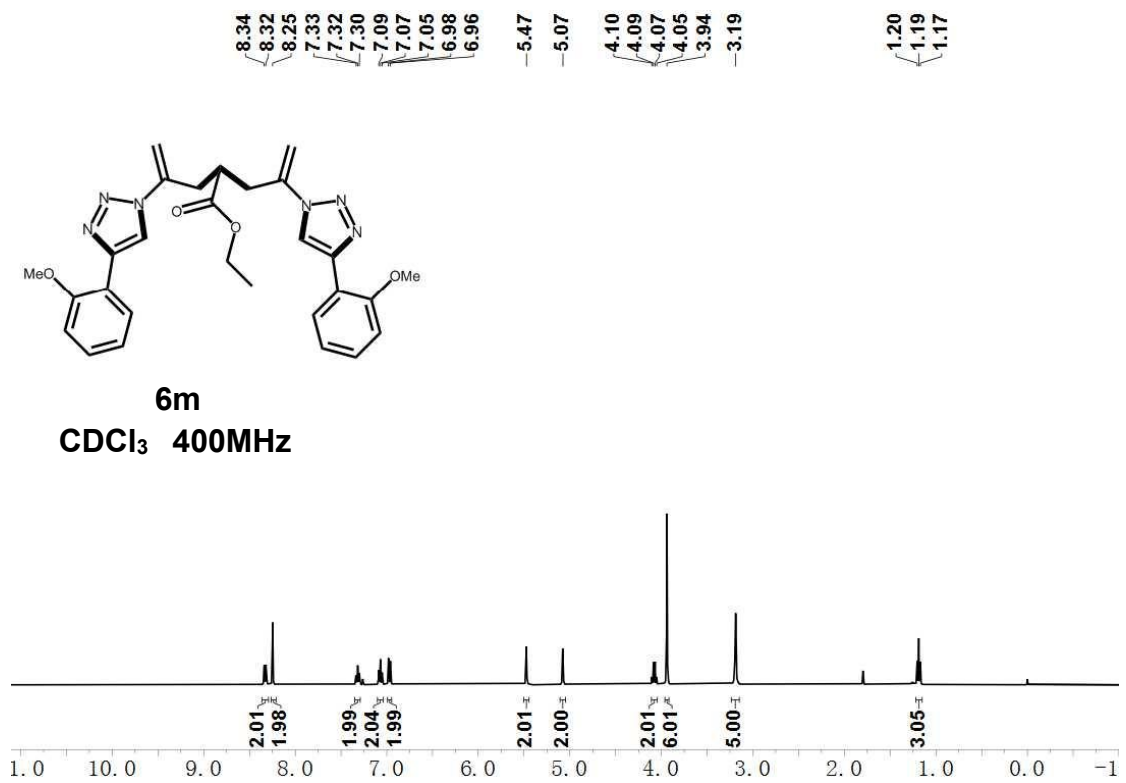

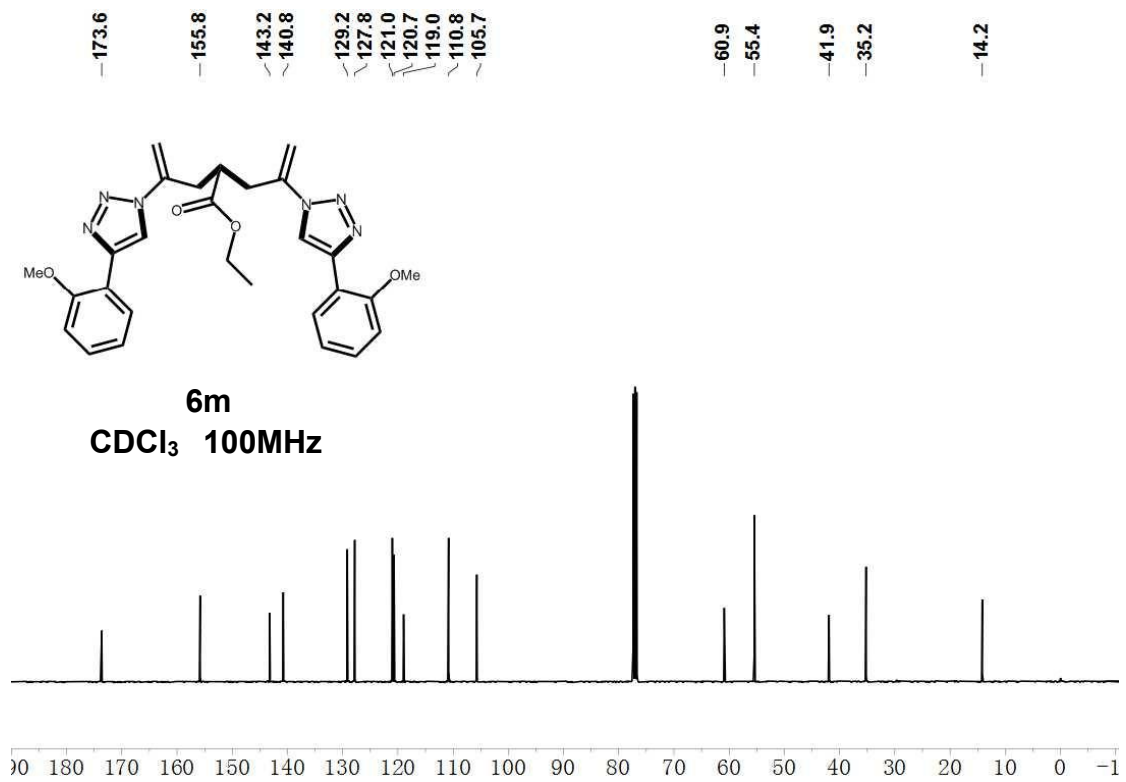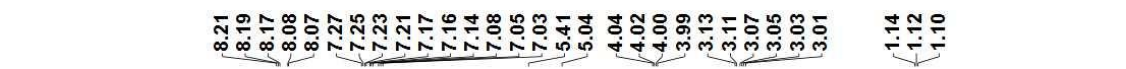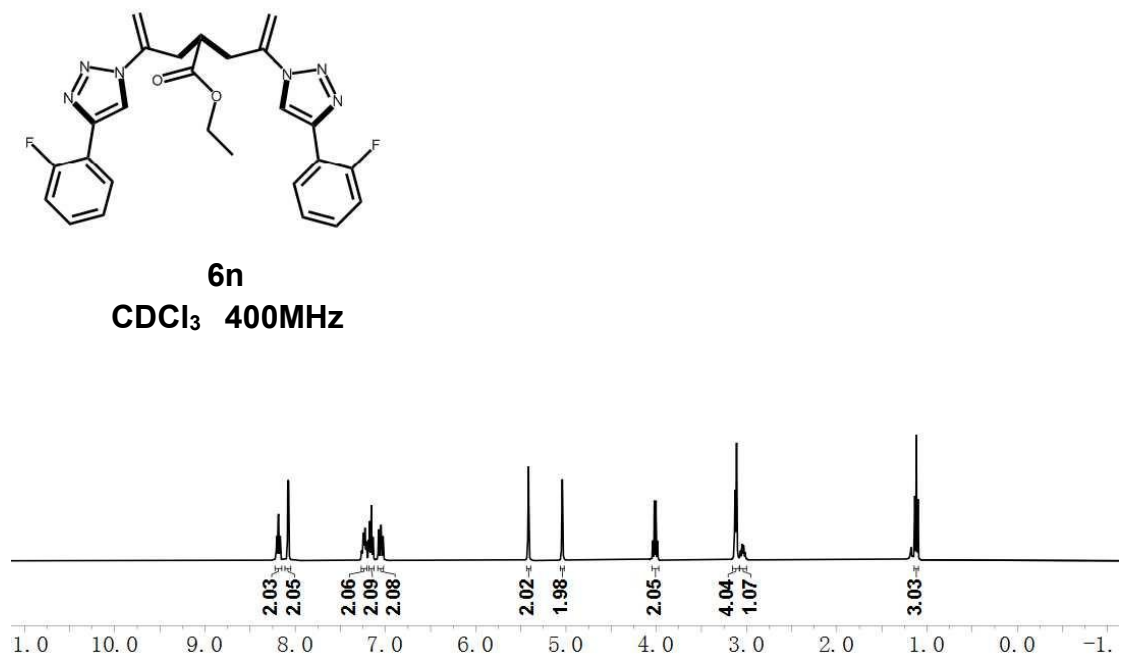

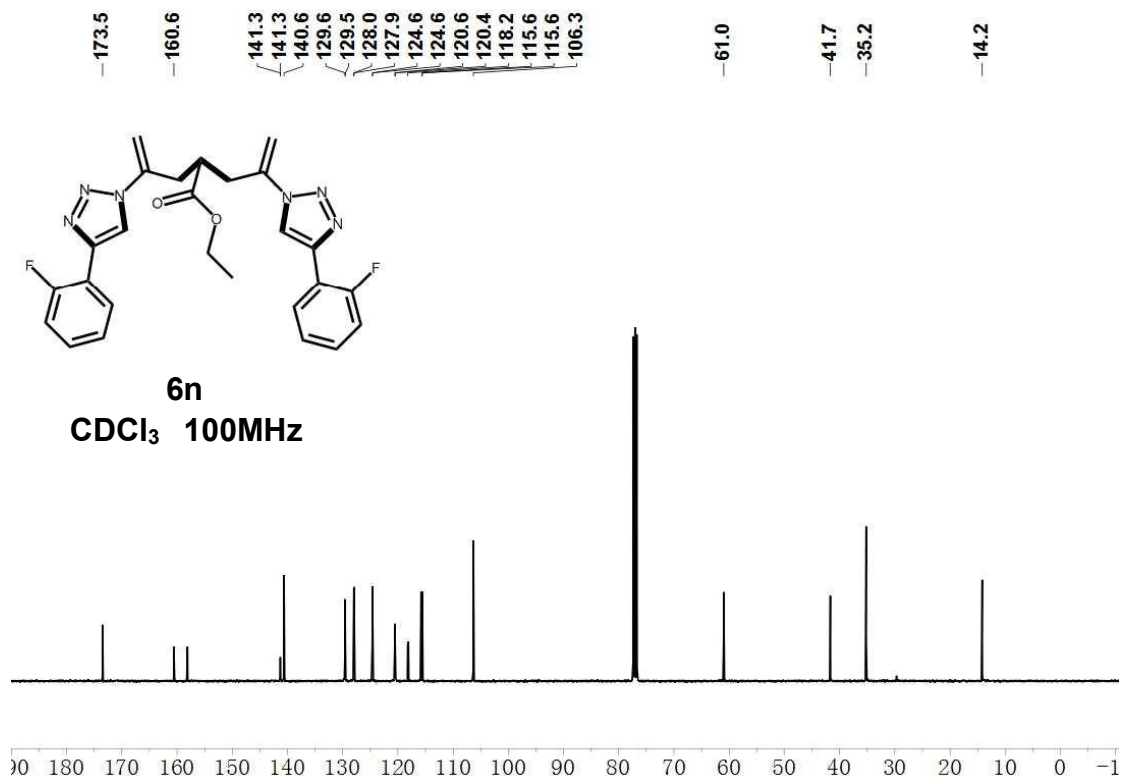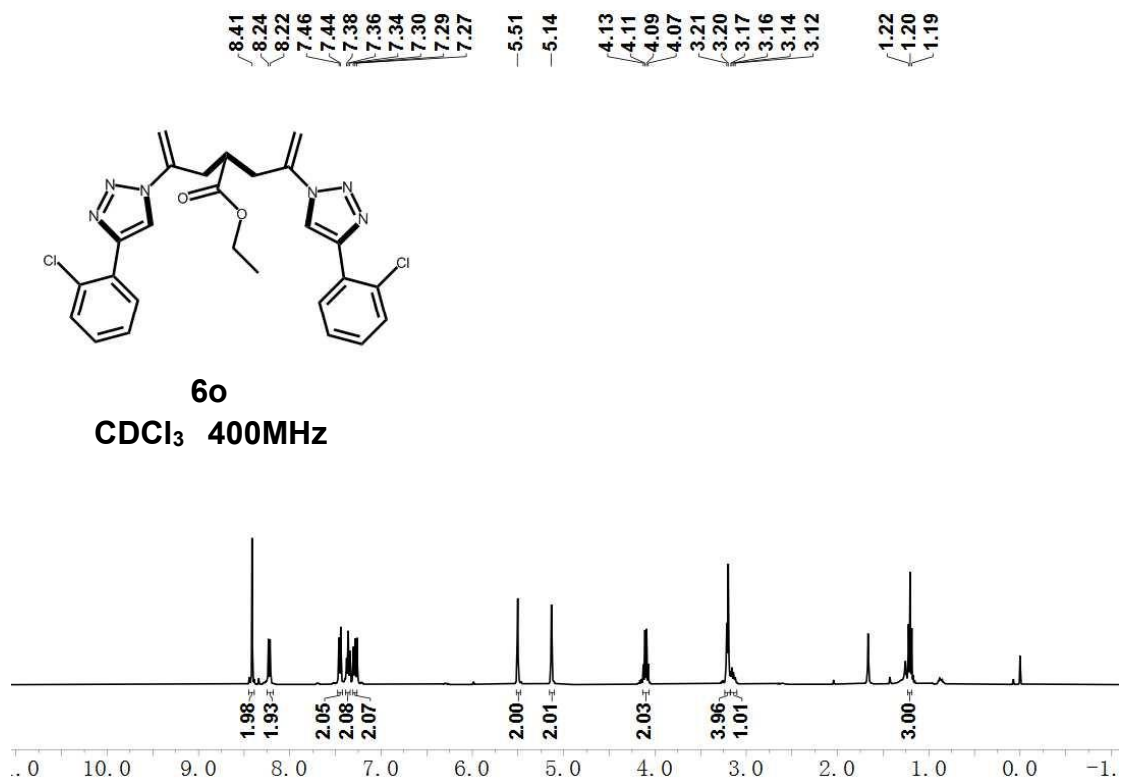

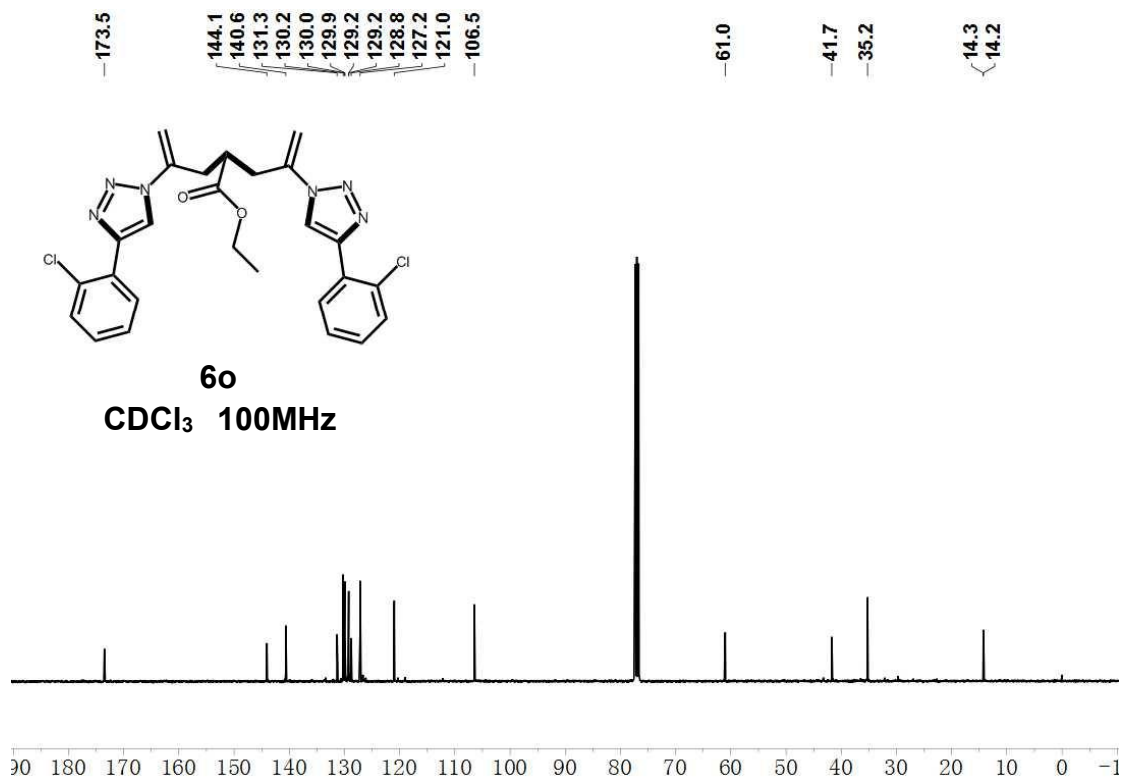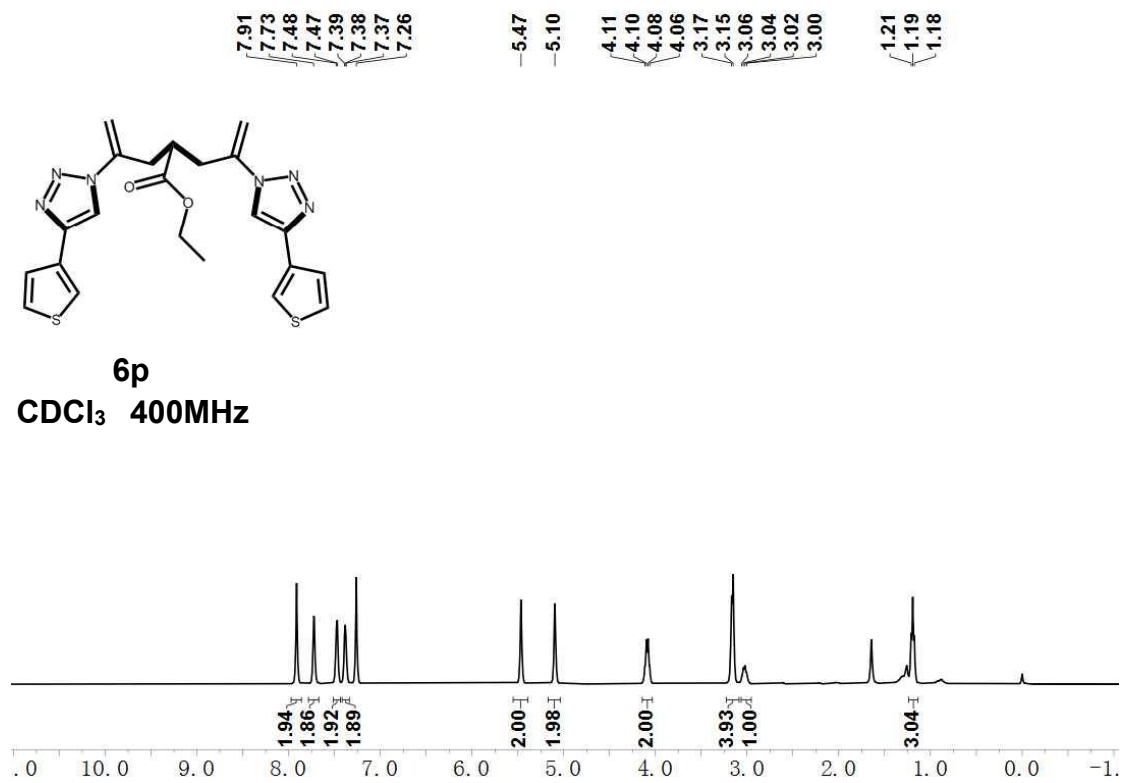

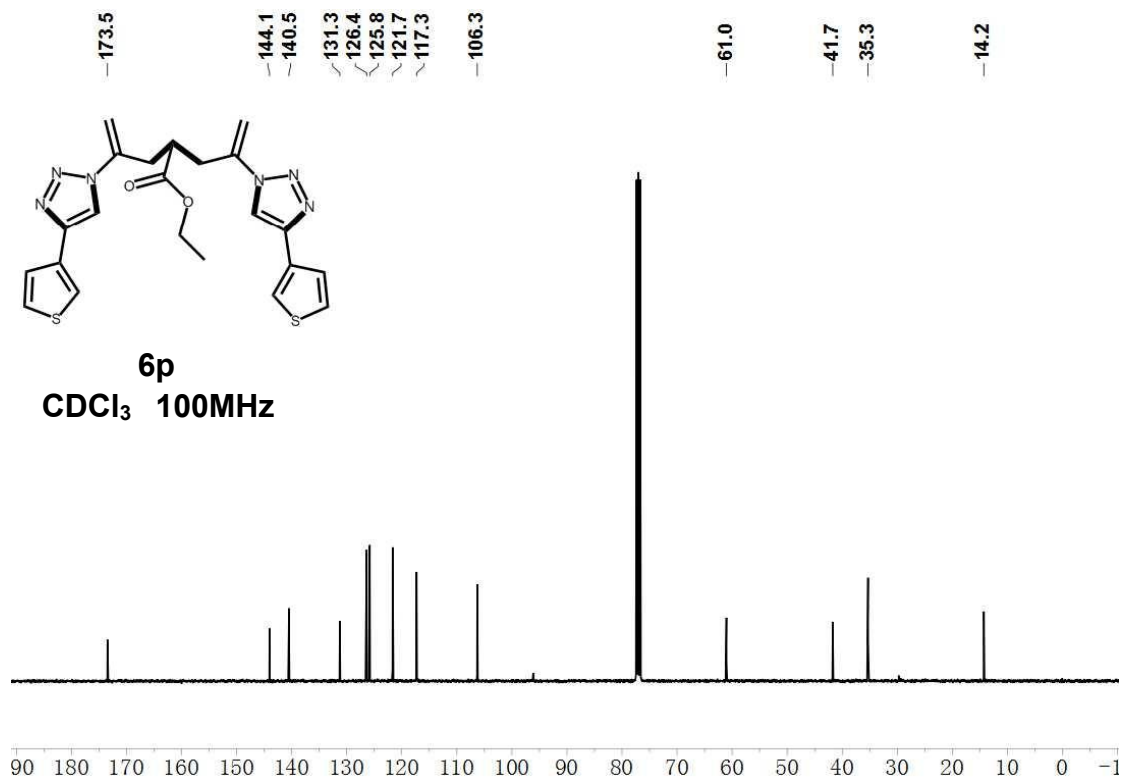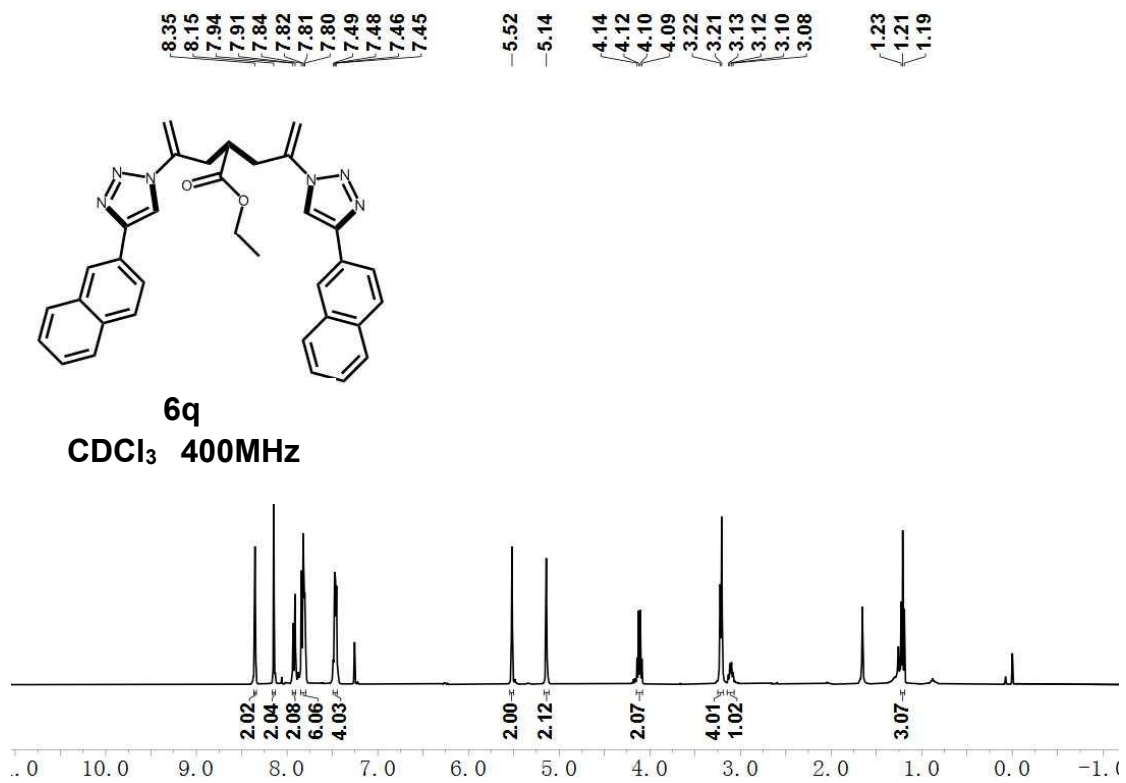

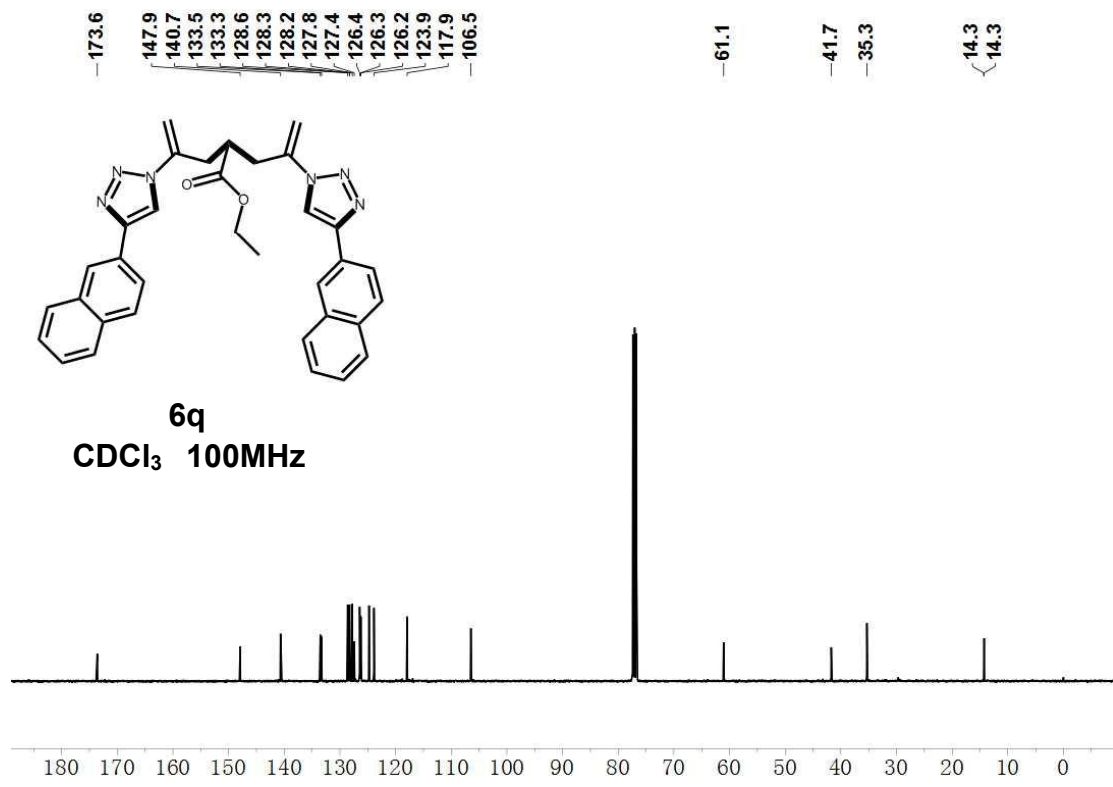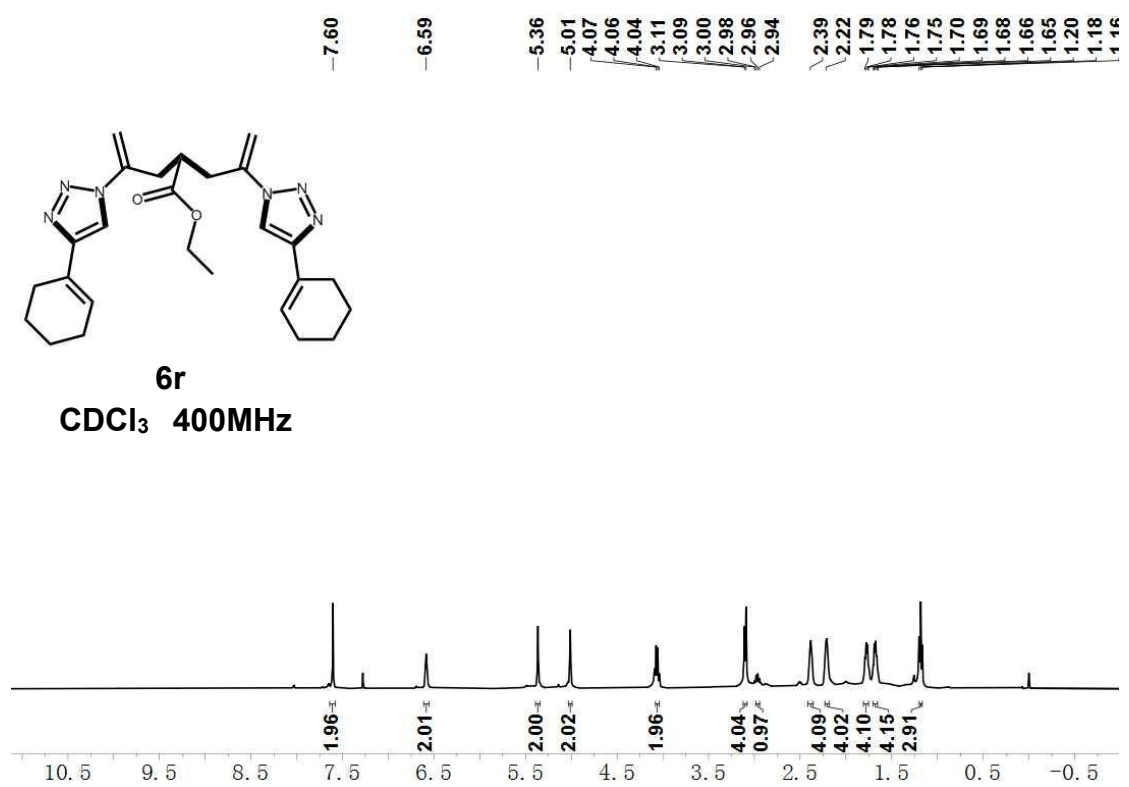

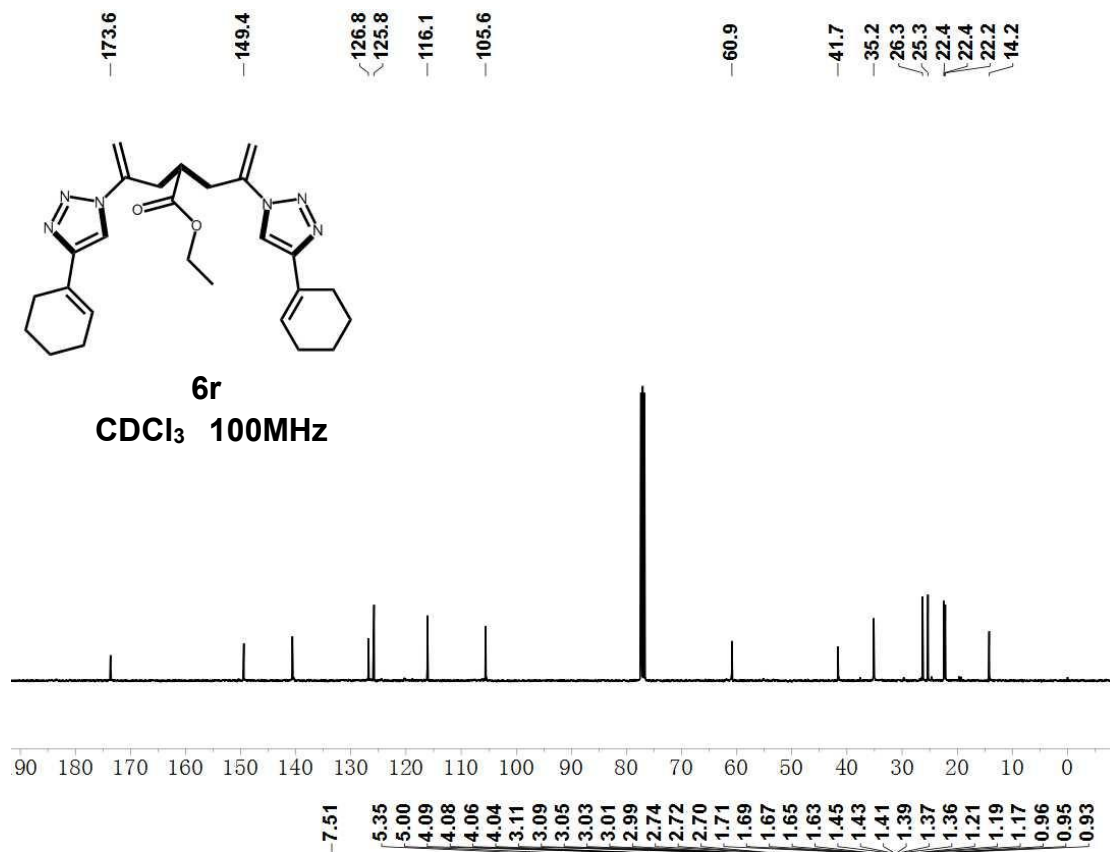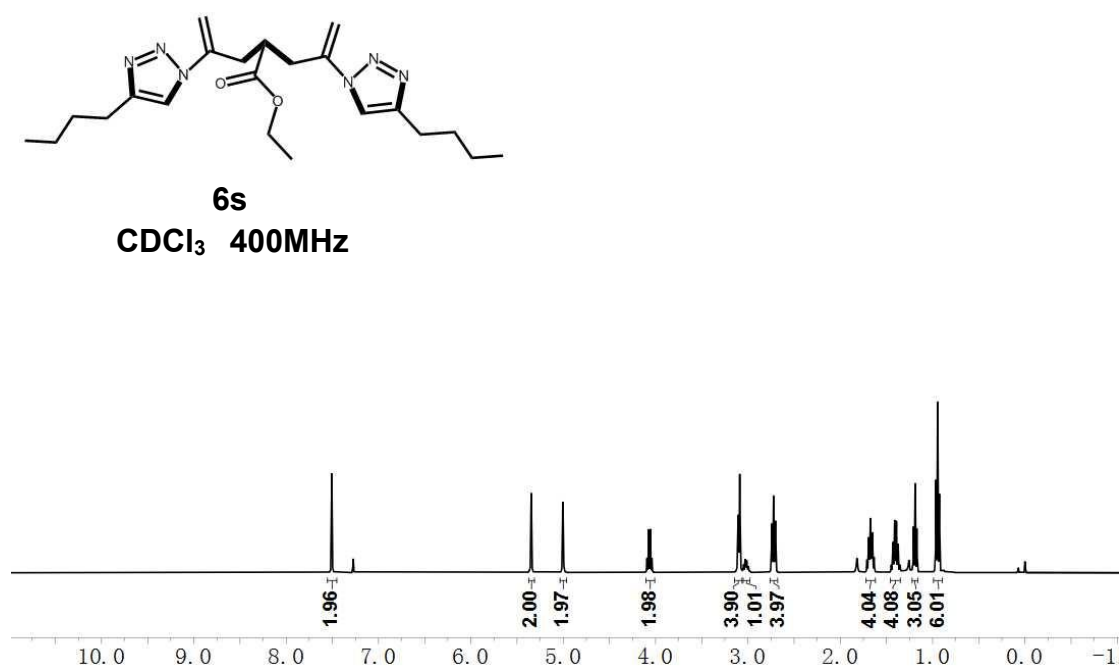

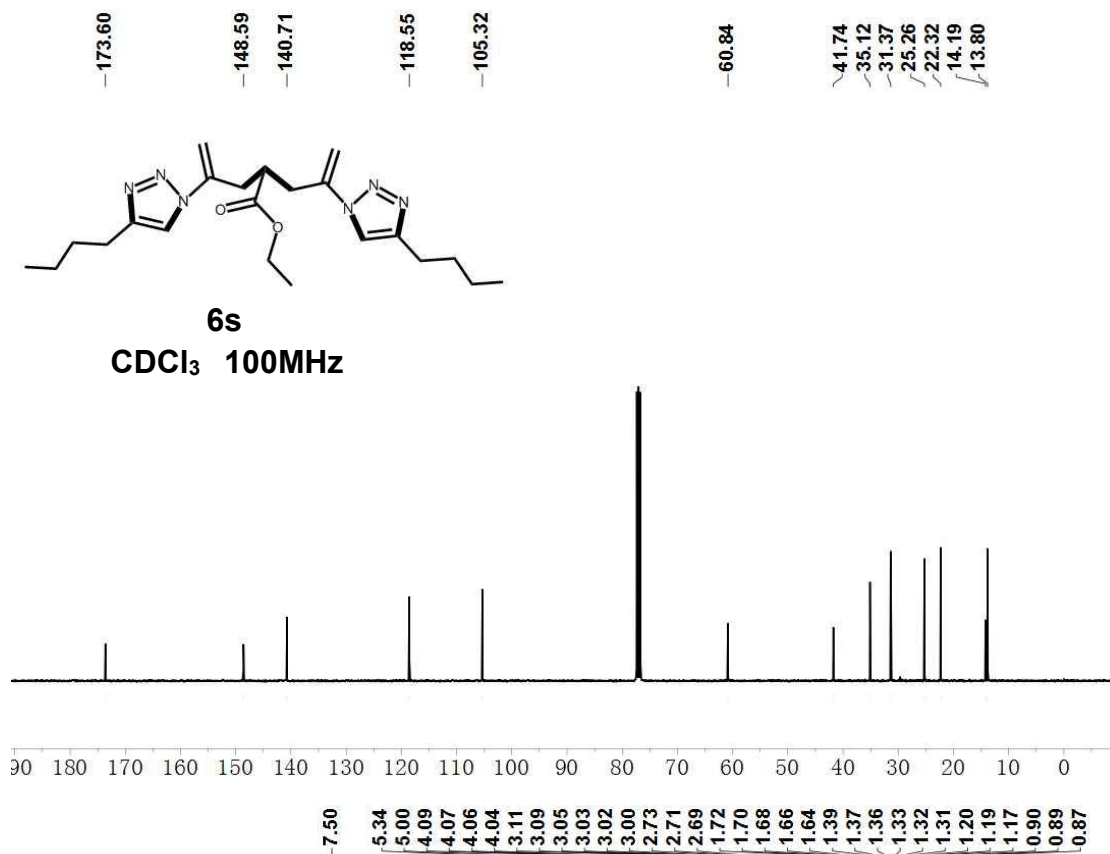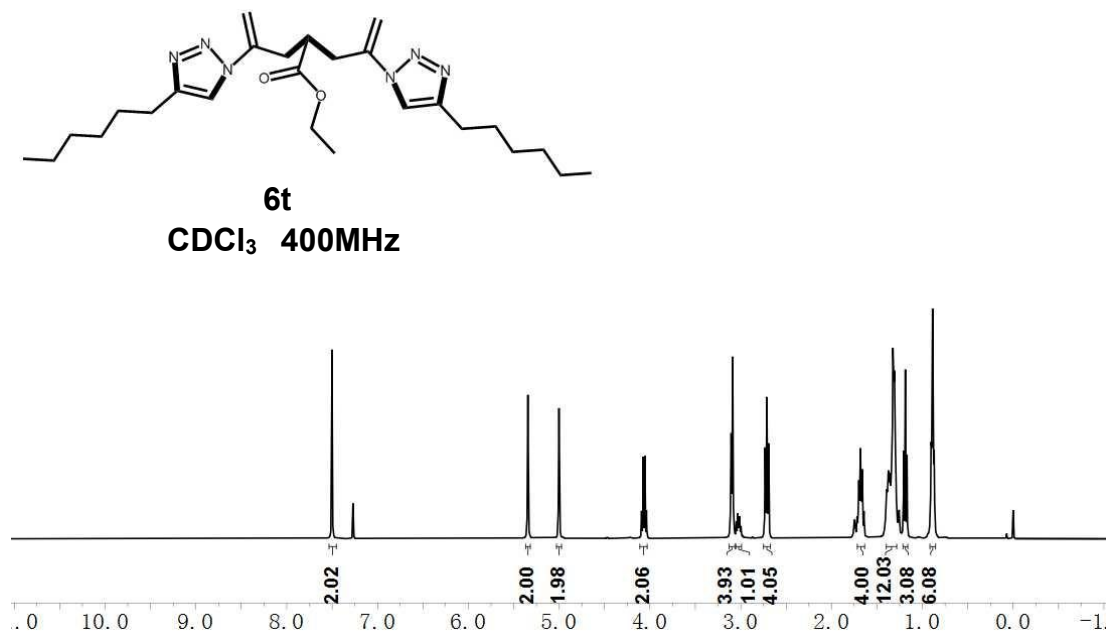

**6t**  
CDCl<sub>3</sub> 100MHz



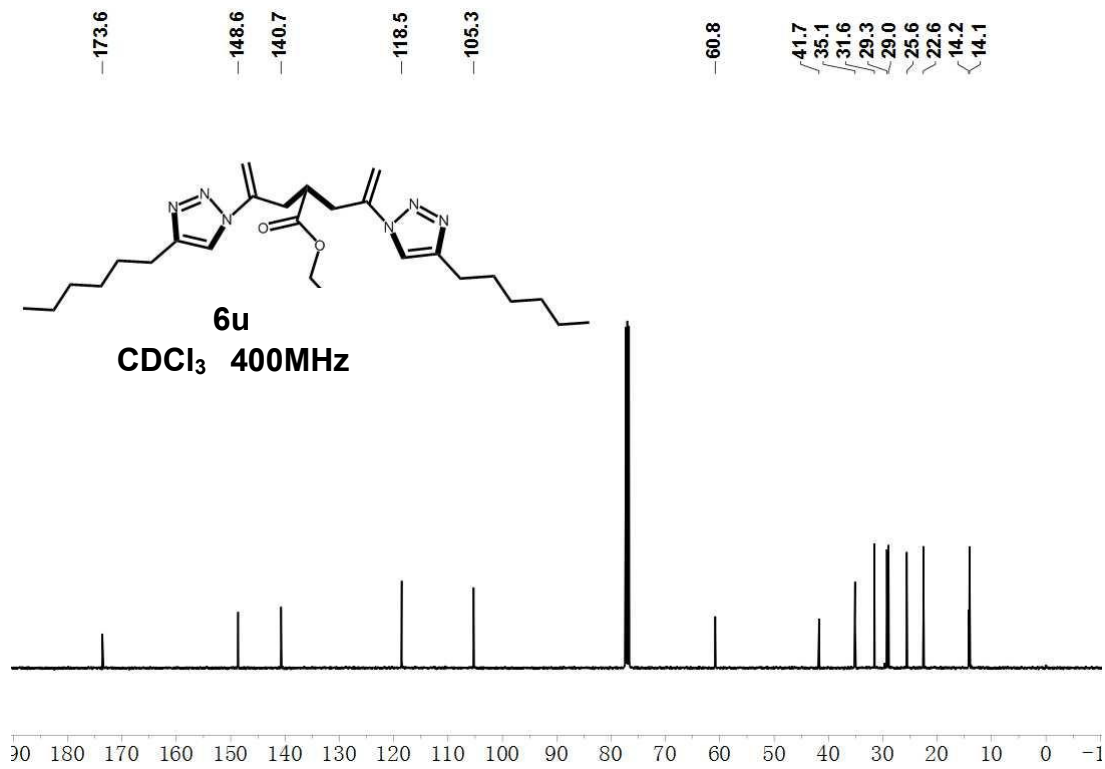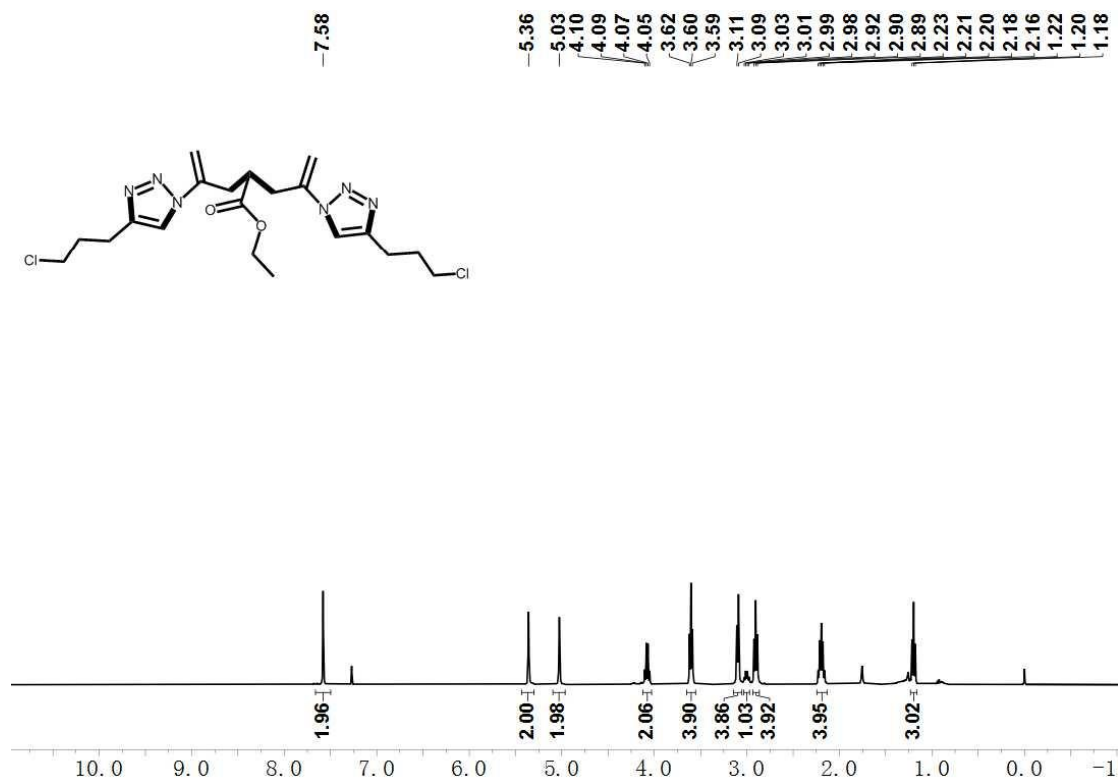

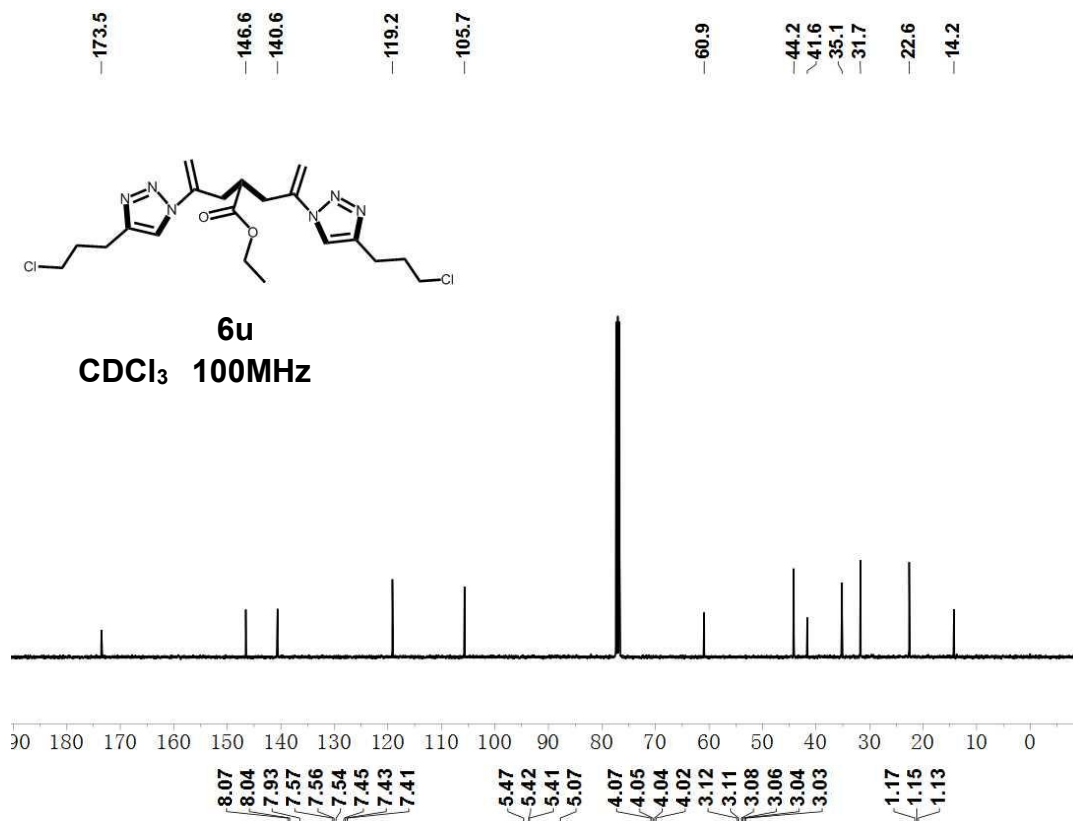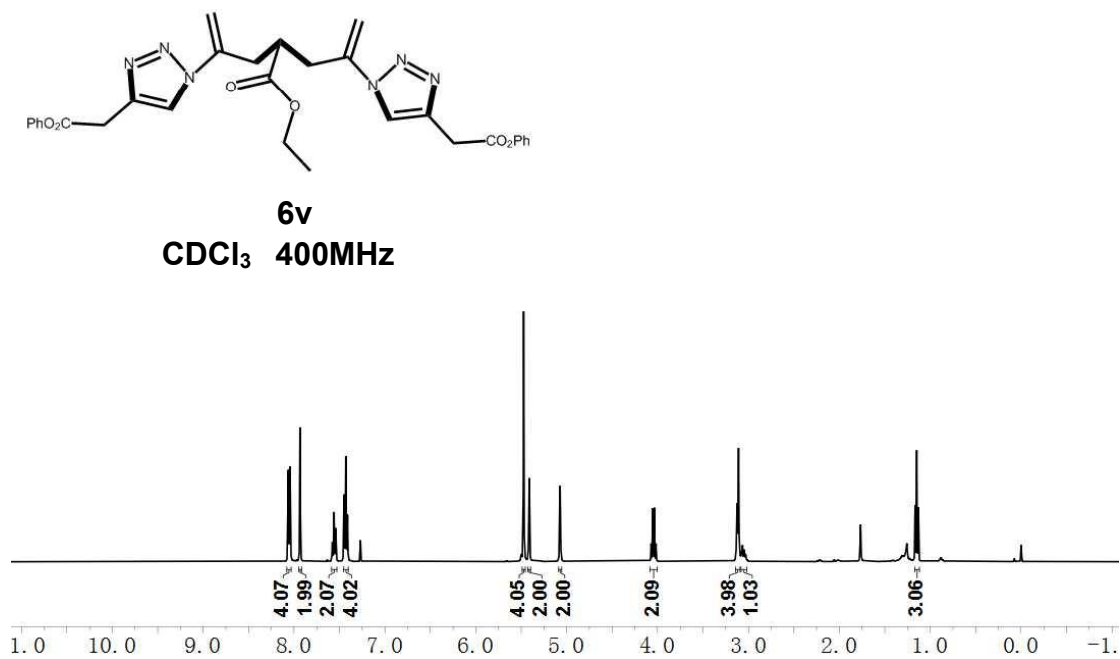

**6v**  
CDCl<sub>3</sub> 100MHz

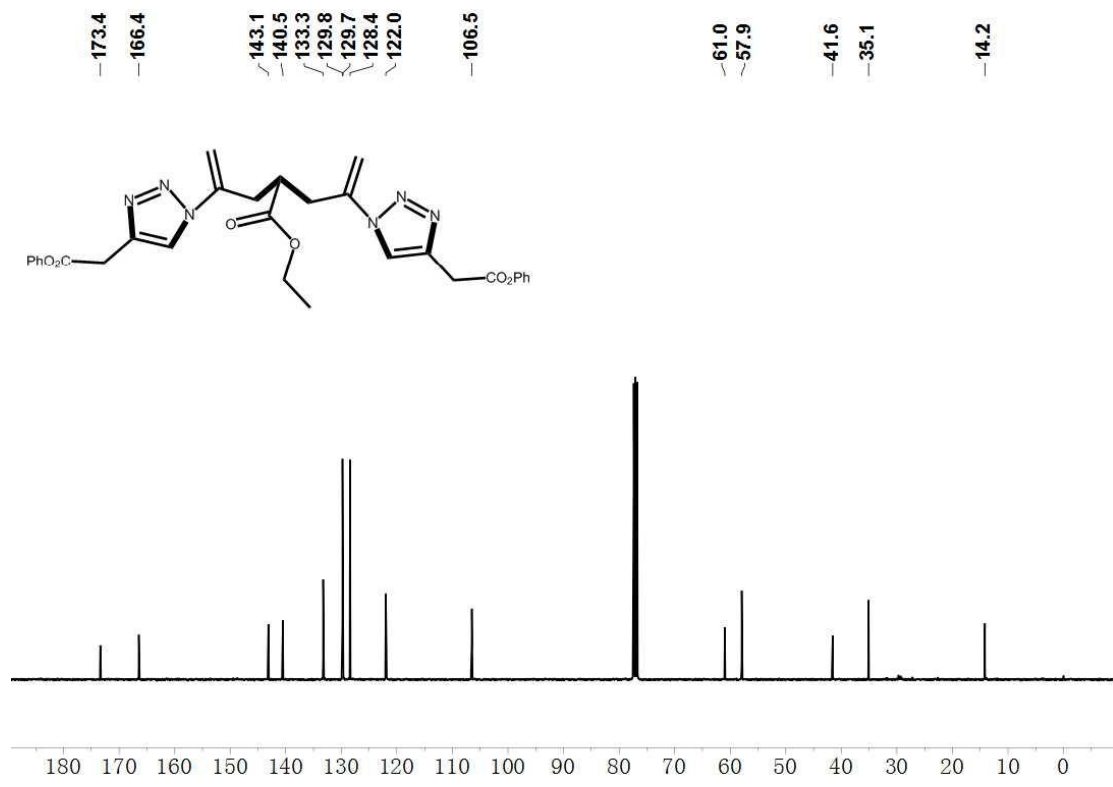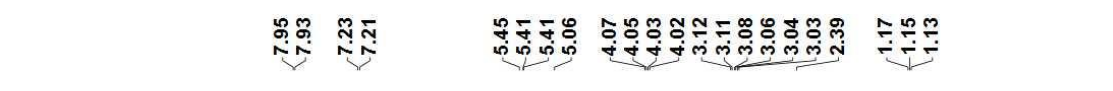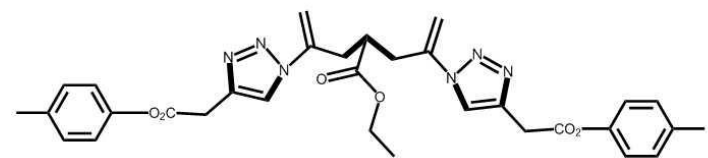

**6w**  
**CDCl<sub>3</sub> 400MHz**

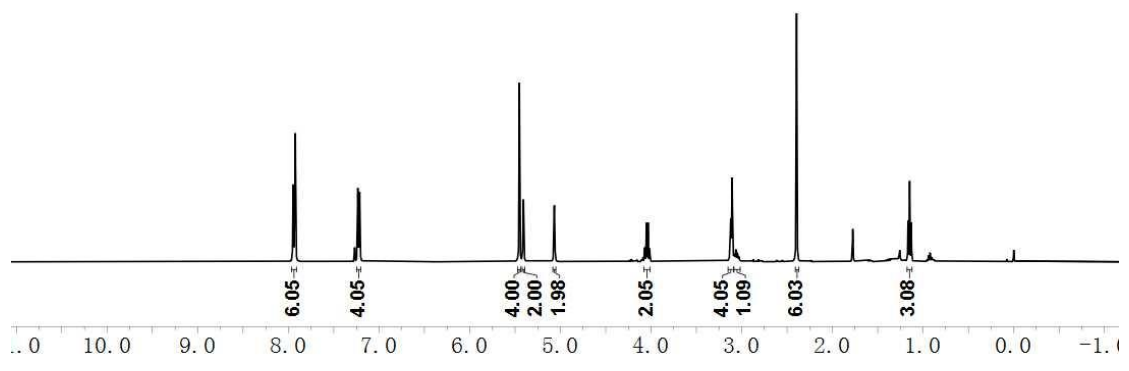

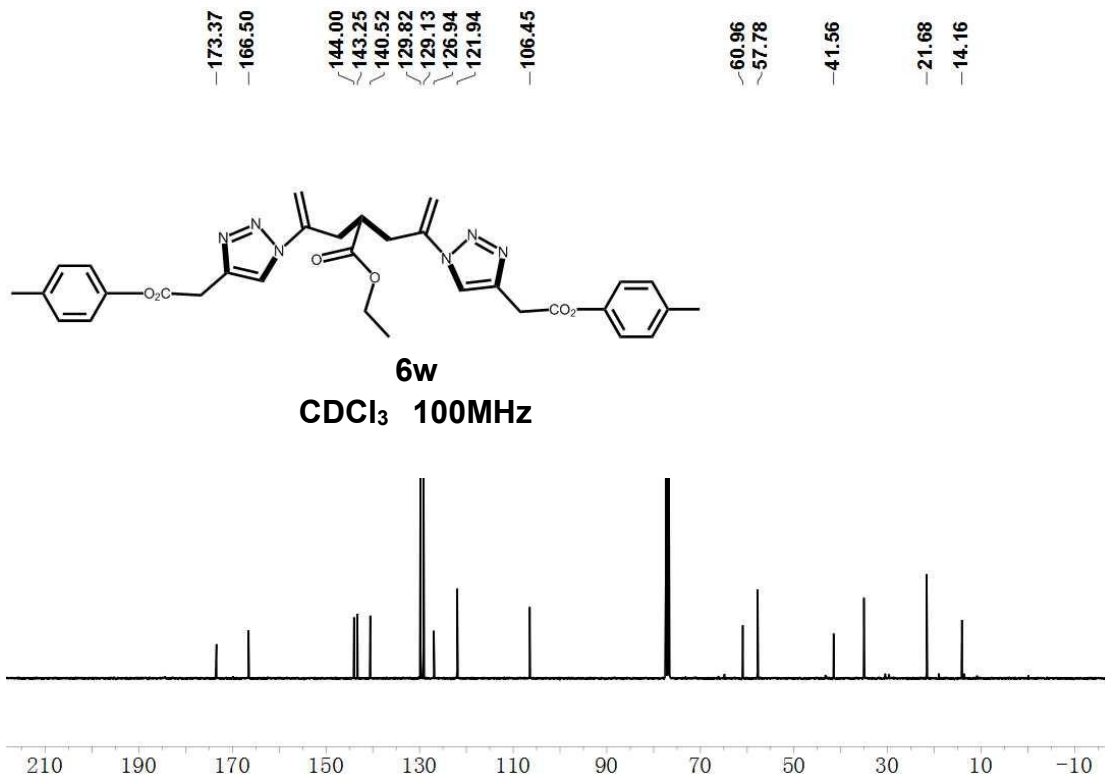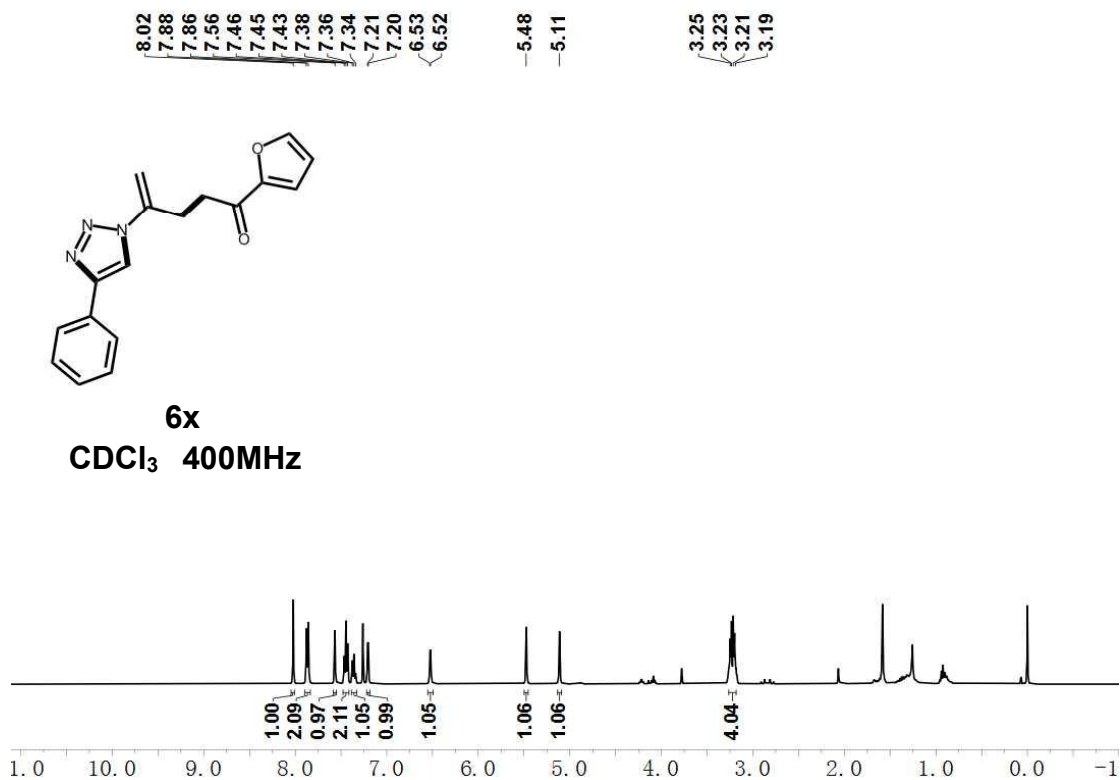

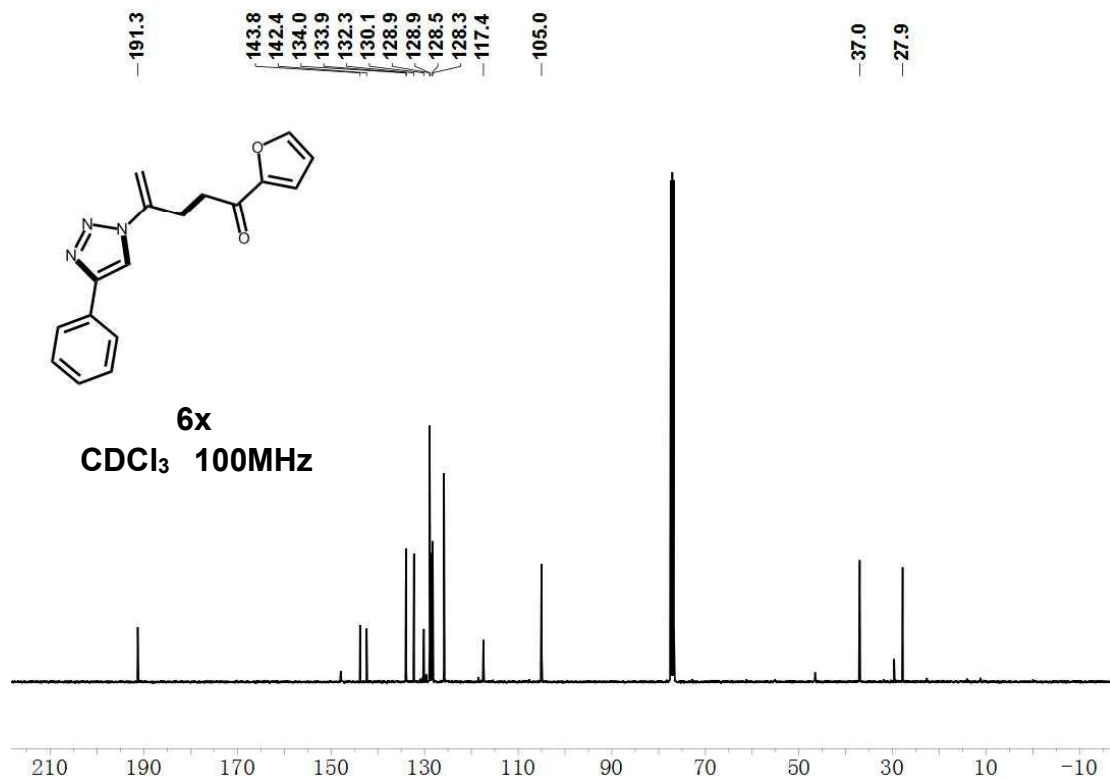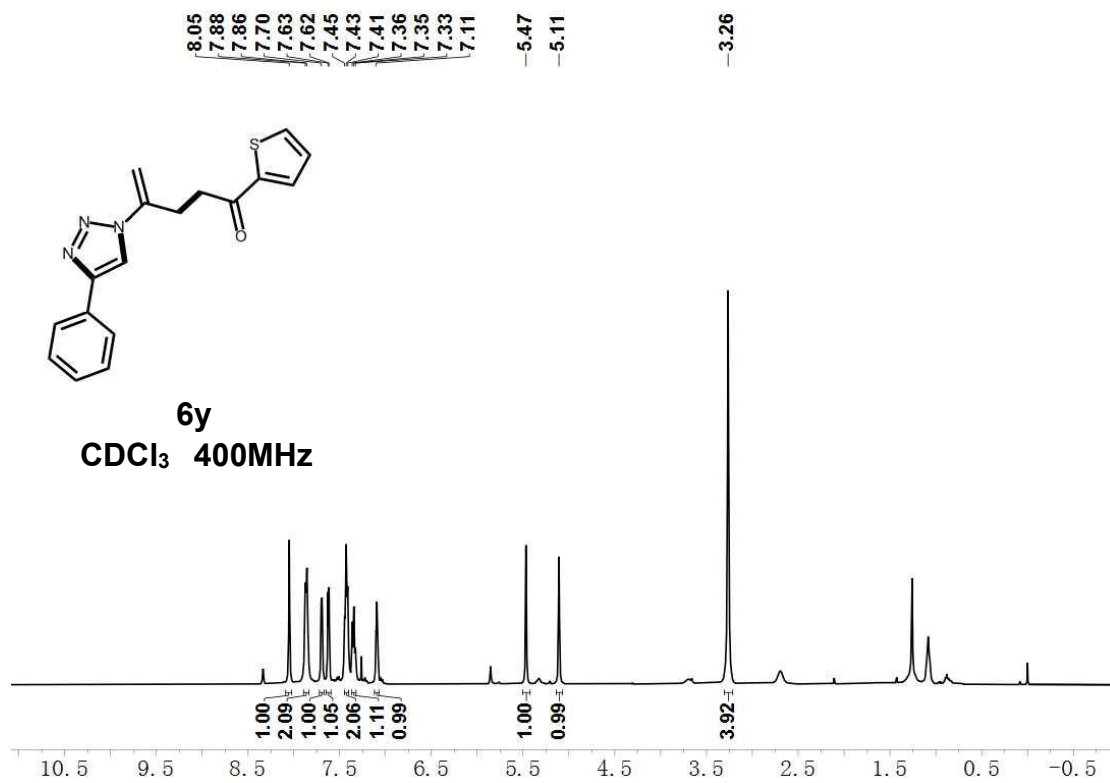

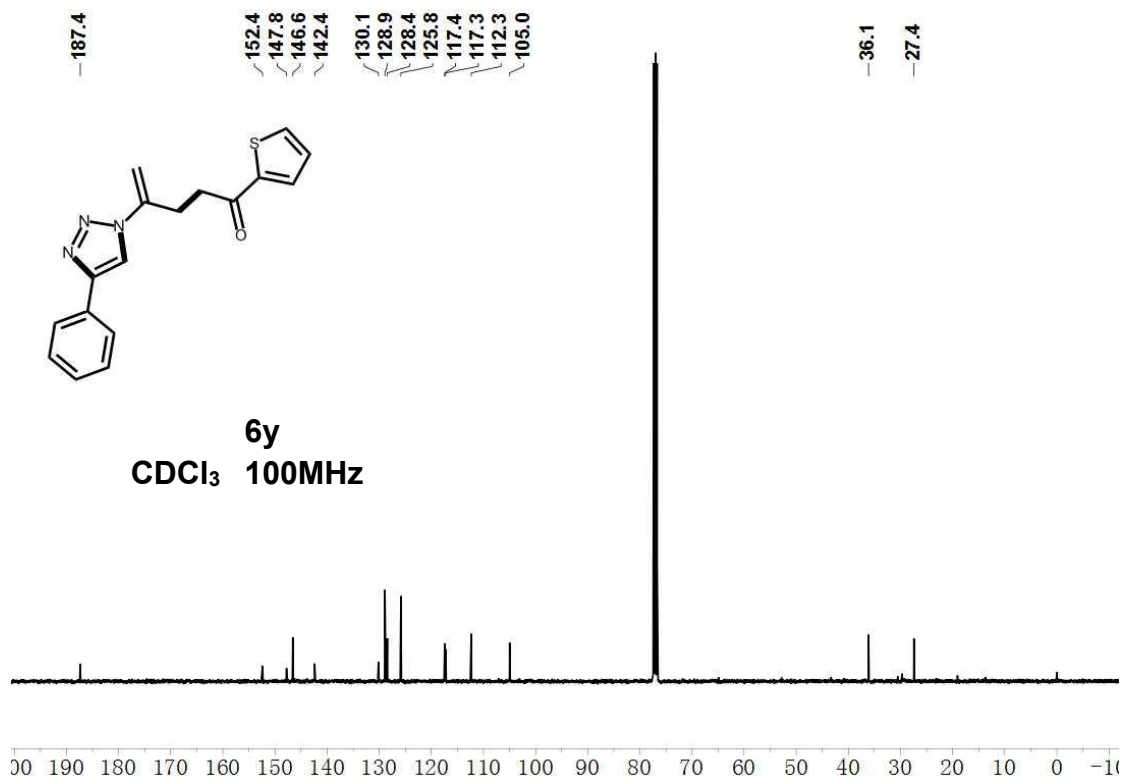

Supplement: d2qo01118b1.pdf [file d2qo01118b1.pdf]
